# Supplementary material for: EAT1 transcription factor, a non-cell-autonomous regulator of pollen production, activates meiotic small RNA biogenesis in rice anther tapetum
Source: PLoS Genet. 2018 Feb 12;14(2):e1007238. doi: 10.1371/journal.pgen.1007238 (PMC5825165; doi:10.1371/journal.pgen.1007238)
Supplement: S1 Data — (XLSX) [file pgen.1007238.s014.xlsx]

## Sheet: Fig 3
Fig 3D
Genotype	Target	Sample stage	Replicates	Qty(SDM)	Relative quantity	Mean	SE		Internal Standard	Qty(SDM)
WT	chr5-20	ST.1	replicate1	4.883e-06	0.000934724	0.000905315	0.000449876		Ubiquitine	0.005224
			replicate2	1.211e-06	0.000111819					0.01083
			replicate3	1.424e-05	0.0016694					0.00853
		ST.2	replicate1	0.005817	0.242577	0.364232	0.0770406			0.02398
			replicate2	0.003429	0.506949					0.006764
			replicate3	0.002547	0.343169					0.007422
		ST.3	replicate1	0.005741	0.428753	0.373636	0.0279419			0.01339
			replicate2	0.004964	0.354066					0.01402
			replicate3	0.00474	0.338088					0.01402
		ST.4	replicate1	3.639e-07	1.48774e-05	0.000151728	0.000124075			0.02446
			replicate2	1.108e-05	0.000399423					0.02774
			replicate3	1e-06	4.08831e-05					0.02446
		ST.5	replicate1	3.157e-06	0.000203809	0.000700748	0.000357459			0.01549
			replicate2	7.602e-06	0.000504111					0.01508
			replicate3	1.867e-05	0.00139432					0.01339
		ST.6	replicate1	1.093e-05	0.00225036	0.0015469	0.000667353			0.004857
			replicate2	1.168e-05	0.00217748					0.005364
			replicate3	1e-06	0.000212857					0.004698
Genotype	Target	Sample stage	Replicates	Qty(SDM)	Relative quantity	Mean	SE		Internal Standard	Qty(SDM)
eat1-4	chr5-20	ST.1	replicate1	1.172e-08	1.91378e-06	0.000487559	0.000483161		Ubiquitine	0.006124
			replicate2	1.108e-05	0.00145388					0.007621
			replicate3	6.53e-08	6.88528e-06					0.009484
		ST.2	replicate1	1e-06	8.70322e-05	0.000146115	2.97281e-05			0.01149
			replicate2	1e-06	0.000169895					0.005886
			replicate3	1.32e-06	0.000181418					0.007276
		ST.3	replicate1	1.164e-08	7.08029e-07	0.000112409	6.44174e-05			0.01644
			replicate2	2.299e-06	0.000223856					0.01027
			replicate3	1e-06	0.000112663					0.008876
		ST.4	replicate1	1.187e-06	4.98321e-05	0.000284072	0.000247843			0.02382
			replicate2	1.248e-05	0.000779513					0.01601
			replicate3	4.556e-07	2.28715e-05					0.01992
		ST.5	replicate1	1.093e-07	1.28136e-05	0.000996858	0.000963699			0.00853
			replicate2	3.044e-05	0.00292411					0.01041
			replicate3	1e-06	5.36481e-05					0.01864
		ST.6	replicate1	3.965e-09	3.88725e-07	0.00016551	0.000113403			0.0102
			replicate2	1e-06	0.000113417					0.008817
			replicate3	2.694e-06	0.000382725					0.007039
Genotype	Target	Sample stage	Replicates	Qty(SDM)	Relative quantity	Mean	SE		Internal Standard	Qty(SDM)
WT	chr6-97	ST.1	replicate1	8.751e-06	0.00122409	0.00107928	0.000492556		Ubiquitine	0.007149
			replicate2	1.741e-06	0.000163015					0.01068
			replicate3	1.612e-05	0.00185075					0.00871
		ST.2	replicate1	0.01441	0.668057	0.841627	0.0923891			0.02157
			replicate2	0.007712	0.983297					0.007843
			replicate3	0.006893	0.873527					0.007891
		ST.3	replicate1	0.01766	1.12843	1.16894	0.0798734			0.01565
			replicate2	0.01753	1.32302					0.01325
			replicate3	0.01601	1.05537					0.01517
		ST.4	replicate1	2.491e-06	9.65878e-05	0.000345107	0.00016838			0.02579
			replicate2	1.816e-05	0.000666178					0.02726
			replicate3	6.942e-06	0.000272556					0.02547
		ST.5	replicate1	2.306e-05	0.00160697	0.00153716	0.000173044			0.01435
			replicate2	1.778e-05	0.0012087					0.01471
			replicate3	2.322e-05	0.00179582					0.01293
		ST.6	replicate1	6.655e-08	1.2749e-05	0.000564536	0.000313384			0.00522
			replicate2	3.639e-06	0.000582986					0.006242
			replicate3	6.248e-06	0.00109787					0.005691
Genotype	Target	Sample stage	Replicates	Qty(SDM)	Relative quantity	Mean	SE		Internal Standard	Qty(SDM)
eat1-4	chr6-97	ST.1	replicate1	2.134e-07	2.98503e-05	0.000271007	0.00020018		Ubiquitine	0.007149
			replicate2	1e-06	0.000114811					0.00871
			replicate3	7.499e-06	0.00066836					0.01122
		ST.2	replicate1	0.002439	0.178551	0.120761	0.0589516			0.01366
			replicate2	1.962e-05	0.00286549					0.006847
			replicate3	0.001556	0.180867					0.008603
		ST.3	replicate1	0.002105	0.0988263	0.242261	0.105343			0.0213
			replicate2	0.002274	0.180333					0.01261
			replicate3	0.004991	0.447623					0.01115
		ST.4	replicate1	7.139e-06	3.15606e-05	4.10553e-05	5.02732e-06			0.2262
			replicate2	8.39e-07	4.29376e-05					0.01954
			replicate3	1.096e-06	4.86679e-05					0.02252
		ST.5	replicate1	1.306e-05	0.00144501	0.000805923	0.000425368			0.009038
			replicate2	1.175e-05	0.000972682					0.01208
			replicate3	1.894e-09	7.71487e-08					0.02455
		ST.6	replicate1	6.204e-06	0.000607045	0.000775482	0.000343063			0.01022
			replicate2	2.99e-06	0.000283681					0.01054
			replicate3	1.119e-05	0.00143572					0.007794
Genotype	Target	Sample stage	Replicates	Qty(SDM)	Relative quantity	Mean	SE		Internal Standard	Qty(SDM)
WT	chr10-100	ST.1	replicate1	1.081e-06	8.86066e-05	0.000172624	8.51813e-05		Ubiquitine	0.0122
			replicate2	7.788e-07	8.62841e-05					0.009026
			replicate3	2.998e-06	0.000342981					0.008741
		ST.2	replicate1	0.01308	0.671803	1.40116	0.369147			0.01947
			replicate2	0.01354	1.86501					0.00726
			replicate3	0.01514	1.66667					0.009084
		ST.3	replicate1	0.01693	1.26061	1.74945	0.365268			0.01343
			replicate2	0.01766	1.52373					0.01159
			replicate3	0.03287	2.46402					0.01334
		ST.4	replicate1	8.081e-06	0.000293748	0.000180903	5.66974e-05			0.02751
			replicate2	3.909e-06	0.000134146					0.02914
			replicate3	3.828e-06	0.000114817					0.03334
		ST.5	replicate1	8.31e-06	0.00055511	0.000567594	0.000109436			0.01497
			replicate2	9.424e-06	0.000763077					0.01235
			replicate3	8.788e-06	0.000384595					0.02285
		ST.6	replicate1	9.623e-06	0.00205	0.000963618	0.000551022			0.004696
			replicate2	1.343e-06	0.000256					0.005237
			replicate3	3.104e-06	0.000585					0.005304
Genotype	Target	Sample stage	Replicates	Qty(SDM)	Relative quantity	Mean	SE		Internal Standard	Qty(SDM)
eat1-4	chr10-100	ST.1	replicate1	8.31e-06	0.00108062	0.00100251	0.000343379		Ubiquitine	0.00769
			replicate2	1.114e-05	0.00155435					0.007167
			replicate3	3.748e-06	0.000372565					0.01006
		ST.2	replicate1	0.001127	0.113426	0.0577256	0.0314163			0.009936
			replicate2	3.43e-05	0.00469477					0.007306
			replicate3	0.0003871	0.0550562					0.007031
		ST.3	replicate1	0.0006674	0.0354058	0.0413111	0.015644			0.01885
			replicate2	0.0002341	0.0176546					0.01326
			replicate3	0.0005886	0.070873					0.008305
		ST.4	replicate1	3.964e-06	0.000136033	0.000183052	8.04646e-05			0.02914
			replicate2	5.39e-06	0.000339849					0.01586
			replicate3	1.39e-06	7.32736e-05					0.01897
		ST.5	replicate1	2.921e-05	0.00303544	0.00209521	0.000682359			0.009623
			replicate2	8.138e-06	0.000768461					0.01059
			replicate3	4.142e-05	0.00248173					0.01669
		ST.6	replicate1	9.228e-06	0.000505367	0.0016982	0.000961711			0.01826
			replicate2	8.974e-06	0.000987891					0.009084
			replicate3	1.935e-05	0.00360134					0.005373
Genotype	Target	Sample stage	Replicates	Qty(SDM)	Relative quantity	Mean	SE		Internal Standard	Qty(SDM)
WT	chr10-101	ST.1	replicate1	1.102e-05	0.00186716	0.00134679	0.000416275		Ubiquitine	0.005902
			replicate2	4.734e-06	0.000523788					0.009038
			replicate3	1.531e-05	0.00164943					0.009282
		ST.2	replicate1	0.02044	1.03128	1.56652	0.304158			0.01982
			replicate2	0.01574	2.08449					0.007551
			replicate3	0.0122	1.5838					0.007703
		ST.3	replicate1	0.0284	2.2084	2.24898	0.0337481			0.01286
			replicate2	0.03247	2.31598					0.01402
			replicate3	0.02936	2.22256					0.01321
		ST.4	replicate1	8.756e-05	0.003407	0.00285729	0.0004078			0.0257
			replicate2	5.403e-05	0.00206064					0.02622
			replicate3	8.698e-05	0.00310421					0.02802
		ST.5	replicate1	3.202e-05	0.00192082	0.00165051	0.000367597			0.01667
			replicate2	3.138e-05	0.00210745					0.01489
			replicate3	1.203e-05	0.000923254					0.01303
		ST.6	replicate1	8.952e-06	0.00208769	0.00249521	0.000216247			0.004288
			replicate2	1.312e-05	0.00257356					0.005098
			replicate3	1.269e-05	0.00282439					0.004493
Genotype	Target	Sample stage	Replicates	Qty(SDM)	Relative quantity	Mean	SE		Internal Standard	Qty(SDM)
eat1-4	chr10-101	ST.1	replicate1	2.259e-05	0.00328391	0.00301822	0.00022768		Ubiquitine	0.006879
			replicate2	2.098e-05	0.00256511					0.008179
			replicate3	3.138e-05	0.00320564					0.009789
		ST.2	replicate1	0.003365	0.296999	0.172408	0.0754951			0.01133
			replicate2	0.000251	0.0362455					0.006925
			replicate3	0.001587	0.183979					0.008626
		ST.3	replicate1	0.0009926	0.0662175	0.157685	0.0696757			0.01499
			replicate2	0.001426	0.112372					0.01269
			replicate3	0.002697	0.294464					0.009159
		ST.4	replicate1	3.075e-05	0.00137584	0.00151212	0.000377338			0.02235
			replicate2	3.159e-05	0.00222308					0.01421
			replicate3	1.798e-05	0.000937435					0.01918
		ST.5	replicate1	3.837e-05	0.00447777	0.00291759	0.000788173			0.008569
			replicate2	2.566e-05	0.00194247					0.01321
			replicate3	3.942e-05	0.00233254					0.0169
		ST.6	replicate1	2.057e-05	0.00188889	0.00253929	0.00106412			0.01089
			replicate2	9.196e-06	0.00110956					0.008288
			replicate3	2.895e-05	0.00461944					0.006267
Genotype	Target	Sample stage	Replicates	Qty(SDM)	Relative quantity	Mean	SE		Internal Standard	Qty(SDM)
WT	chr12-83	ST.1	replicate1	5.794e-05	0.00865422	0.00806036	0.00144474		Ubiquitine	0.006695
			replicate2	5.357e-05	0.00531448					0.01008
			replicate3	8.848e-05	0.0102124					0.008664
		ST.2	replicate1	0.004465	0.213636	0.274576	0.0305231			0.0209
			replicate2	0.002519	0.30193					0.008343
			replicate3	0.00262	0.308163					0.008502
		ST.3	replicate1	0.01228	0.918474	0.914921	0.0407717			0.01337
			replicate2	0.01092	0.842593					0.01296
			replicate3	0.01267	0.983696					0.01288
		ST.4	replicate1	9.059e-05	0.00372798	0.00342943	0.000428096			0.0243
			replicate2	6.993e-05	0.00258521					0.02705
			replicate3	9.421e-05	0.00397511					0.0237
		ST.5	replicate1	5.273e-05	0.00379626	0.00544448	0.000938514			0.01389
			replicate2	9.421e-05	0.00704637					0.01337
			replicate3	7.16e-05	0.0054908					0.01304
		ST.6	replicate1	5.273e-05	0.0102568	0.0115	0.0011598			0.005141
			replicate2	6.365e-05	0.0105137					0.006054
			replicate3	8.442e-05	0.0138575					0.006092
Genotype	Target	Sample stage	Replicates	Qty(SDM)	Relative quantity	Mean	SE		Internal Standard	Qty(SDM)
eat1-4	chr12-83	ST.1	replicate1	6.939e-05	0.0109001	0.00915054	0.00102409		Ubiquitine	0.006366
			replicate2	6.939e-05	0.00919804					0.007544
			replicate3	8.508e-05	0.0073535					0.01157
		ST.2	replicate1	0.004792	0.347246	0.198177	0.0982735			0.0138
			replicate2	9.348e-05	0.0127063					0.007357
			replicate3	0.001715	0.234578					0.007311
		ST.3	replicate1	0.003585	0.213775	0.349708	0.0945813			0.01677
			replicate2	0.005922	0.531598					0.01114
			replicate3	0.003238	0.303752					0.01066
		ST.4	replicate1	0.0001164	0.00532967	0.00481705	0.00066052			0.02184
			replicate2	0.0001068	0.00561514					0.01902
			replicate3	8.31e-05	0.00350633					0.0237
		ST.5	replicate1	0.0001003	0.0106003	0.0072224	0.00177658			0.009462
			replicate2	7.273e-05	0.00648796					0.01121
			replicate3	9.57e-05	0.00457895					0.0209
		ST.6	replicate1	9.202e-05	0.00751797	0.00844604	0.00134837			0.01224
			replicate2	6.724e-05	0.00671728					0.01001
			replicate3	8.376e-05	0.0111029					0.007544

## Sheet: Fig 4
Fig 4B
Repeats in 5' upstream
24-PHAS Loci	24-PHAS_chr2_1	24-PHAS_chr2_2	24-PHAS_chr2_3	24-PHAS_chr2_4	24-PHAS_chr2_5	24-PHAS_chr2_6	24-PHAS_chr2_7	24-PHAS_chr3_8	24-PHAS_chr4_11	24-PHAS_chr4_12	24-PHAS_chr4_13	24-PHAS_chr5_14	24-PHAS_chr5_15	24-PHAS_chr5_16	24-PHAS_chr5_17	24-PHAS_chr5_18	24-PHAS_chr5_19	24-PHAS_chr5_20	24-PHAS_chr5_21	24-PHAS_chr6_22	24-PHAS_chr6_24	24-PHAS_chr6_25	24-PHAS_chr6_26	24-PHAS_chr6_27	24-PHAS_chr6_28	24-PHAS_chr6_29	24-PHAS_chr6_30	24-PHAS_chr6_31	24-PHAS_chr6_32	24-PHAS_chr6_33	24-PHAS_chr6_34	24-PHAS_chr6_35	24-PHAS_chr6_36	24-PHAS_chr6_37	24-PHAS_chr6_38	24-PHAS_chr6_39	24-PHAS_chr6_40	24-PHAS_chr7_41	24-PHAS_chr7_43	24-PHAS_chr7_44	24-PHAS_chr7_45	24-PHAS_chr7_46	24-PHAS_chr7_47	24-PHAS_chr7_48	24-PHAS_chr7_49	24-PHAS_chr7_50	24-PHAS_chr8_51	24-PHAS_chr8_52	24-PHAS_chr8_53
Position (10 bp window)
-2000	-	+	-	+	+	+	+	+	-	-	-	+	+	-	-	-	-	+	-	-	-	+	-	-	+	-	+	-	+	-	-	+	+	-	-	-	-	-	-	-	-	+	+	-	-	-	-	-	-
-1990	-	+	-	+	+	+	+	+	-	-	-	+	+	-	-	-	-	+	-	-	-	+	-	-	+	-	+	-	+	-	-	+	+	-	-	-	-	-	-	-	-	+	+	-	-	-	-	-	-
-1980	-	+	-	+	+	+	+	+	-	-	-	+	+	-	-	-	-	+	-	-	-	+	-	-	+	-	+	-	+	-	-	+	+	-	-	-	-	-	-	-	-	-	+	-	-	-	-	-	-
-1970	-	+	-	+	+	+	+	+	-	-	-	+	+	-	-	-	-	+	-	-	-	+	-	-	+	-	+	-	+	-	-	+	+	-	-	-	-	-	-	-	-	-	+	-	-	-	-	-	-
-1960	-	+	-	+	+	+	+	+	-	-	-	+	+	-	-	-	-	+	-	-	-	+	-	-	+	-	+	-	+	-	-	+	+	-	-	-	-	-	-	-	-	-	+	-	-	-	-	-	-
-1950	-	+	-	+	+	+	+	+	-	-	-	+	+	-	-	-	-	+	-	-	-	+	-	-	+	-	+	-	+	-	-	+	+	-	-	-	-	-	-	-	-	-	+	-	-	-	-	-	-
-1940	-	+	-	+	+	+	+	+	-	-	-	+	+	-	-	-	-	+	-	-	-	+	-	-	+	-	+	-	+	-	-	+	+	-	-	-	-	-	-	-	-	-	+	-	-	-	-	-	-
-1930	-	+	-	+	+	+	+	+	-	-	-	+	+	-	-	-	-	+	-	-	-	+	-	-	+	-	+	-	+	-	-	+	+	-	-	-	-	-	-	-	-	-	+	-	-	-	-	-	-
-1920	-	+	-	+	+	+	+	+	-	-	-	+	+	-	-	-	-	+	-	-	-	+	-	-	+	-	+	-	+	-	-	+	+	-	-	-	-	-	-	-	-	-	+	-	-	-	-	-	-
-1910	-	+	-	+	+	+	+	+	-	-	-	+	+	-	-	-	-	+	-	-	-	+	-	-	+	-	+	-	+	-	-	+	+	-	-	-	-	-	-	-	-	-	+	-	-	-	-	-	-
-1900	-	+	-	+	+	+	+	+	-	-	-	+	+	-	-	+	-	+	-	-	-	+	-	-	+	-	+	-	+	-	-	+	+	-	-	-	-	-	-	-	-	-	+	-	-	-	-	-	-
-1890	-	+	-	+	+	+	+	-	-	-	-	+	+	-	-	+	-	+	-	-	-	+	-	-	+	-	-	-	+	-	-	+	+	-	-	-	-	-	-	-	-	-	+	-	-	-	-	-	-
-1880	-	+	-	-	+	+	+	-	-	-	-	+	+	-	-	+	-	+	-	-	-	+	-	-	-	-	-	-	+	-	-	+	-	-	-	-	-	-	-	-	-	-	+	-	-	-	-	-	-
-1870	-	+	-	-	+	+	+	-	-	-	-	+	+	-	-	+	-	+	-	-	-	+	-	-	-	-	-	-	+	-	-	+	-	-	-	-	-	-	-	-	-	-	+	-	-	-	-	-	-
-1860	-	+	-	-	+	+	+	-	-	-	-	+	+	-	-	+	-	+	-	-	-	-	-	-	-	-	-	-	+	-	-	+	-	-	-	-	-	-	-	-	-	-	+	-	-	-	-	-	-
-1850	-	-	-	-	+	+	+	-	-	-	-	+	+	-	-	+	-	+	-	-	-	-	-	-	-	-	-	-	+	-	-	+	-	-	-	-	-	-	-	-	-	-	+	-	-	-	-	-	-
-1840	-	-	-	-	+	+	+	-	-	-	-	+	+	-	-	+	-	+	-	+	-	-	-	-	+	-	-	-	+	-	-	+	-	-	-	-	-	-	-	-	-	-	+	-	-	-	-	-	-
-1830	-	-	-	-	+	+	+	-	-	-	-	+	+	-	-	+	-	+	-	+	-	-	-	-	+	-	-	-	+	-	-	+	-	-	-	-	-	-	-	-	-	-	+	-	-	-	-	-	-
-1820	-	-	-	-	+	+	+	-	-	-	-	+	+	-	-	+	-	+	-	+	-	-	-	-	+	-	-	-	+	-	-	+	+	-	-	-	-	-	+	-	-	-	+	-	-	-	-	-	-
-1810	-	-	-	-	+	+	+	-	-	-	-	+	+	-	-	+	-	+	-	+	-	+	-	-	+	-	-	-	+	-	-	+	+	-	-	-	-	-	+	-	-	-	+	-	-	-	-	-	-
-1800	-	-	-	-	+	+	+	-	-	+	-	+	+	-	-	+	-	+	-	+	-	+	-	-	+	+	-	-	+	-	-	+	+	-	-	-	-	-	+	-	-	-	+	-	-	-	-	-	-
-1790	-	-	-	-	+	+	+	-	-	+	-	+	+	-	-	+	-	+	-	+	-	+	-	-	+	+	+	-	+	-	-	+	+	-	-	-	-	-	+	-	-	-	+	-	-	-	-	-	-
-1780	-	-	+	-	+	+	+	-	-	+	-	+	+	-	-	+	-	+	-	+	-	+	-	-	+	+	+	-	+	-	-	+	+	-	-	-	-	-	+	-	-	-	+	-	-	-	-	-	-
-1770	-	-	+	-	+	+	+	-	-	+	-	+	+	-	-	+	-	+	-	+	-	+	-	-	+	+	+	-	+	-	-	+	+	-	-	-	-	-	+	-	-	-	+	-	-	-	-	-	-
-1760	-	-	+	-	+	+	+	-	-	+	-	+	+	-	-	+	-	+	-	+	-	+	-	-	+	+	+	-	+	-	-	-	+	-	-	-	-	-	+	-	-	-	+	-	-	-	-	-	-
-1750	-	-	+	-	+	+	+	-	-	+	-	+	+	-	-	+	-	+	-	+	-	+	-	-	+	+	+	-	+	-	-	-	+	-	-	-	-	-	+	-	-	-	+	-	-	-	-	-	-
-1740	-	-	+	-	+	+	+	-	-	+	-	+	+	-	-	+	-	+	-	+	-	+	-	-	+	+	+	-	+	-	-	-	+	-	-	-	-	-	+	-	-	-	+	-	-	-	-	-	-
-1730	-	-	+	-	+	+	+	-	-	+	-	+	+	-	-	+	-	+	-	+	-	+	-	-	+	+	+	-	+	-	-	-	+	-	-	-	-	-	+	-	-	-	+	-	-	-	-	-	-
-1720	-	-	+	-	+	+	+	-	-	+	-	+	+	-	-	+	-	+	-	+	-	+	-	-	+	+	+	-	+	-	-	-	+	-	-	-	-	-	+	-	-	-	+	-	-	-	-	-	-
-1710	-	-	+	-	+	+	+	+	-	+	-	+	+	-	-	+	-	+	-	+	-	+	-	-	+	+	+	-	+	-	-	-	+	-	-	-	-	-	+	-	-	-	+	-	-	-	-	-	-
-1700	-	-	+	-	+	+	+	+	-	+	-	+	+	-	-	+	-	+	-	+	-	+	-	-	+	+	+	-	+	-	-	-	+	-	-	-	-	-	+	-	-	-	+	-	-	-	-	-	-
-1690	-	-	+	-	-	+	+	+	-	+	-	+	+	-	-	+	-	+	-	+	-	+	-	-	+	-	+	-	+	-	-	-	+	-	-	-	-	-	+	-	-	-	+	-	-	-	-	-	-
-1680	-	-	+	-	-	+	+	+	-	+	-	+	+	-	-	+	-	+	-	+	-	+	-	-	+	-	+	-	+	-	-	-	+	-	-	-	-	-	+	-	-	-	+	-	-	-	-	-	-
-1670	-	-	+	-	-	+	+	+	+	+	-	+	+	-	-	+	-	+	-	+	-	+	-	-	+	-	+	-	+	-	-	-	+	-	-	-	-	-	+	-	-	-	+	-	-	-	-	-	-
-1660	-	-	+	-	-	+	+	+	+	+	-	+	+	-	-	+	-	+	-	+	-	+	-	-	-	-	+	-	+	-	-	-	-	-	-	-	+	-	+	-	-	-	+	-	-	-	+	-	-
-1650	-	-	+	-	-	+	+	+	+	+	-	+	+	-	-	+	-	+	-	+	-	+	-	-	-	-	+	-	+	-	-	-	-	-	-	-	+	-	+	-	-	-	+	-	-	-	+	-	-
-1640	-	-	+	-	-	+	+	+	+	+	-	+	+	-	-	+	-	+	-	+	-	-	-	-	-	-	+	-	+	-	-	-	-	-	-	-	+	-	-	-	-	-	+	-	-	-	+	-	-
-1630	-	-	+	-	-	+	+	+	+	+	-	+	+	-	-	+	-	+	-	+	-	-	-	-	-	-	+	-	+	-	-	-	-	-	-	-	+	-	-	-	-	-	+	-	-	-	+	-	-
-1620	-	-	+	-	-	+	+	-	+	+	-	+	+	-	-	+	-	+	-	+	-	-	-	-	-	-	+	-	+	-	-	-	-	-	-	-	+	-	-	-	-	-	+	-	-	-	+	-	-
-1610	-	-	+	-	-	+	+	-	-	+	-	+	+	-	-	+	-	+	-	+	-	-	-	-	-	-	+	-	+	-	-	-	-	-	-	-	+	-	-	-	-	-	+	-	-	-	+	-	-
-1600	-	-	+	-	-	+	+	-	+	+	-	+	+	-	-	+	-	+	-	+	-	-	-	-	-	-	+	-	+	-	-	-	-	-	-	-	+	-	-	-	-	-	+	-	-	-	+	-	-
-1590	-	-	-	-	-	+	+	-	+	+	-	+	+	-	-	+	-	+	-	+	-	-	-	-	-	-	+	-	+	-	-	-	-	-	-	-	+	-	-	-	-	-	+	-	-	-	+	-	-
-1580	-	-	-	-	-	+	+	-	+	+	-	+	+	-	-	-	-	+	-	+	-	-	-	-	-	-	+	-	+	-	-	-	-	-	-	-	+	-	-	-	-	-	+	-	-	-	+	-	+
-1570	-	-	-	-	-	+	+	-	+	+	-	+	+	-	-	-	-	+	-	+	-	-	-	-	-	-	+	-	+	-	-	-	-	-	-	-	+	-	-	-	-	-	+	-	-	-	+	-	+
-1560	-	-	-	-	-	+	+	-	+	+	-	+	+	-	+	-	-	+	-	+	-	-	-	+	-	-	+	+	+	-	-	-	-	-	-	-	+	-	-	-	-	-	+	-	-	-	+	-	+
-1550	-	-	-	-	-	+	+	-	+	+	-	+	+	-	+	-	-	+	-	+	-	-	-	+	-	-	+	+	+	-	-	-	-	-	-	-	+	-	-	+	-	-	+	-	-	-	+	-	+
-1540	-	-	-	-	-	+	+	-	+	+	-	+	+	-	+	-	-	+	-	+	-	-	-	+	-	-	+	+	+	-	-	-	-	-	-	-	+	-	-	+	-	-	+	-	-	-	+	-	+
-1530	-	-	-	-	-	+	+	-	+	+	-	+	+	-	+	-	-	+	-	+	-	-	-	+	-	-	+	+	+	-	-	-	-	-	-	-	+	-	-	+	-	-	+	-	-	-	+	-	+
-1520	-	-	-	-	-	+	+	-	+	+	-	-	+	-	+	-	-	+	-	+	-	-	-	+	-	-	+	+	+	-	-	-	-	-	-	-	+	-	-	+	-	-	+	-	-	-	+	-	+
-1510	-	-	-	-	-	+	+	-	+	+	-	-	+	-	+	-	-	+	-	+	-	-	-	+	-	-	+	+	+	-	-	-	-	-	-	-	+	-	-	+	-	-	-	-	-	-	+	-	+
-1500	-	-	-	-	-	+	+	-	+	+	-	-	+	-	+	-	-	+	-	+	-	-	-	+	-	-	+	+	+	-	-	-	-	-	-	-	+	-	-	+	-	-	-	-	-	-	+	-	+
-1490	-	-	-	-	+	+	+	-	+	+	-	-	+	-	-	-	-	+	-	+	-	-	-	+	-	-	+	+	+	-	-	-	-	-	-	-	+	-	-	+	-	-	-	-	-	-	+	+	+
-1480	-	-	-	-	+	+	+	-	+	+	-	-	+	-	-	-	-	+	-	+	-	-	-	+	-	-	+	+	+	-	-	+	-	-	-	-	+	-	-	+	-	-	-	-	-	-	+	+	+
-1470	-	-	-	-	+	+	+	-	+	+	-	-	+	-	-	-	-	+	-	+	-	-	-	+	-	-	+	+	+	-	-	+	-	-	-	-	+	-	-	+	-	-	-	-	-	-	+	+	+
-1460	-	-	-	-	+	+	+	-	+	+	-	-	+	-	-	-	-	+	-	+	-	-	-	+	-	-	+	+	+	-	-	+	-	-	-	-	+	-	-	+	-	-	-	-	-	-	+	+	+
-1450	-	-	-	-	+	+	+	-	+	+	-	-	+	-	-	-	-	+	-	+	-	-	-	+	-	-	+	+	+	-	-	+	-	-	-	-	+	-	-	+	-	-	-	-	-	-	+	+	+
-1440	-	+	-	-	+	+	+	-	+	+	-	-	+	-	-	-	-	+	-	+	-	-	-	+	-	-	+	+	+	-	-	+	-	-	-	-	+	-	-	+	-	-	-	-	-	-	+	+	+
-1430	-	+	-	-	+	+	+	-	+	+	-	-	+	-	-	-	-	+	-	+	-	-	-	+	-	-	+	+	+	-	-	+	-	-	-	-	+	-	-	+	-	-	-	-	-	-	+	+	+
-1420	-	+	-	-	+	+	+	-	+	+	-	-	+	-	-	-	-	+	-	+	-	-	-	+	-	-	+	+	+	-	-	+	-	-	-	-	+	-	-	+	-	-	-	-	-	-	+	+	+
-1410	-	+	-	-	+	+	+	-	+	+	-	-	+	-	-	-	-	+	-	+	-	-	-	+	-	-	+	+	+	-	-	+	-	-	-	-	+	-	-	+	-	-	-	-	-	-	+	+	-
-1400	-	+	-	-	+	+	+	-	+	+	-	-	+	-	-	-	-	+	-	+	-	-	-	+	-	-	+	+	+	-	-	+	-	-	-	-	+	-	-	+	-	-	-	-	-	-	+	+	-
-1390	-	+	-	-	+	+	+	-	+	+	-	-	+	-	-	-	-	+	-	+	-	-	-	+	-	-	+	+	+	-	-	+	-	-	-	-	+	-	-	+	-	-	-	-	-	-	+	+	-
-1380	-	+	-	-	+	+	+	-	+	+	-	-	+	-	-	-	-	+	-	-	-	-	-	+	-	-	+	-	+	-	-	+	-	-	-	-	+	-	-	+	-	-	-	-	-	-	+	+	-
-1370	-	+	-	-	+	+	-	-	+	+	-	-	+	-	-	-	-	+	-	-	-	-	-	+	-	-	+	-	+	-	-	+	-	-	-	-	+	-	-	+	-	-	-	-	-	-	+	+	-
-1360	-	+	-	-	+	+	-	-	+	+	-	-	+	-	-	-	-	+	-	-	-	-	-	+	-	-	+	-	+	-	-	+	-	-	-	-	+	-	-	+	-	-	-	-	-	-	+	+	-
-1350	-	+	-	-	+	+	-	-	+	+	-	-	+	-	+	-	-	+	-	-	-	-	-	+	-	-	+	-	+	-	-	+	+	-	-	-	+	-	-	+	-	-	-	-	-	-	+	-	-
-1340	-	+	-	-	+	+	-	-	+	+	-	-	+	-	+	-	-	+	-	-	-	-	-	+	-	-	+	-	+	-	-	+	+	-	-	-	-	-	-	+	-	-	-	-	-	-	+	-	-
-1330	-	+	-	-	+	+	-	-	+	+	-	-	+	-	+	-	-	+	-	-	-	-	-	+	-	-	+	-	-	-	-	+	+	-	-	-	-	-	-	+	-	-	-	-	-	-	+	-	-
-1320	-	+	-	-	+	+	-	-	+	+	-	-	+	-	+	-	-	+	-	-	-	-	-	+	-	-	+	-	-	-	-	+	+	-	-	-	-	-	-	+	-	-	-	-	-	-	+	-	-
-1310	-	+	-	-	+	+	-	-	+	+	-	-	+	-	+	-	-	+	-	-	-	-	-	+	-	+	+	-	-	-	-	+	+	-	-	-	-	-	-	+	-	-	-	-	-	-	+	-	-
-1300	-	+	-	-	+	+	-	-	+	+	-	-	+	-	+	-	-	+	-	-	-	-	-	-	-	+	+	-	-	-	-	+	+	-	-	-	-	-	-	+	-	-	-	-	-	-	+	-	-
-1290	-	+	-	-	+	+	-	-	+	+	-	-	+	-	+	-	-	+	-	-	-	-	-	-	-	+	+	-	-	-	-	+	+	-	-	-	-	-	-	+	-	-	-	-	-	-	+	-	-
-1280	-	+	-	-	+	+	-	-	+	+	-	-	+	-	+	-	-	+	-	-	-	-	-	+	-	+	+	-	-	-	-	+	+	-	-	-	-	-	-	+	-	-	-	-	-	-	+	-	-
-1270	-	+	-	-	+	+	-	-	+	+	-	-	+	-	+	-	-	+	-	-	-	-	-	+	-	+	+	-	-	-	-	+	+	-	-	-	-	-	-	+	-	-	-	-	-	-	-	-	-
-1260	-	+	-	-	+	+	-	-	+	+	-	-	+	-	+	-	-	+	-	-	-	-	-	+	-	+	+	-	-	-	-	+	+	-	-	-	-	-	-	+	-	-	-	-	-	-	-	-	-
-1250	-	+	-	-	+	+	-	-	+	+	+	-	+	-	+	-	-	+	-	-	-	-	-	+	-	+	+	-	-	-	-	+	+	-	-	-	-	-	-	+	-	-	-	-	-	-	-	-	-
-1240	-	+	-	-	+	+	-	-	+	+	+	-	+	-	-	-	-	+	-	-	-	-	-	+	-	+	+	-	-	-	-	+	+	-	-	-	-	-	-	+	-	-	-	-	-	+	-	-	-
-1230	-	+	-	-	+	+	-	-	+	+	+	-	+	-	-	-	-	+	-	-	-	-	-	+	-	+	+	-	-	-	-	+	+	-	-	-	-	-	-	+	-	-	-	-	-	+	-	-	-
-1220	-	+	-	-	+	+	-	-	+	+	+	-	+	-	-	-	-	+	-	-	-	-	-	+	-	+	+	-	-	-	-	+	+	-	-	-	-	-	-	+	-	-	-	-	-	+	-	-	-
-1210	-	+	-	-	+	+	-	-	+	+	+	-	+	-	-	-	-	+	-	-	-	-	-	+	-	+	+	-	-	-	-	+	+	-	-	-	-	-	-	+	-	-	-	-	-	+	-	-	-
-1200	-	+	-	-	+	+	-	-	+	+	+	-	+	-	-	-	-	+	-	-	-	-	-	+	-	+	+	-	-	-	-	+	+	-	-	-	-	-	-	+	-	-	-	-	-	+	-	-	-
-1190	-	+	-	-	+	+	-	-	+	+	+	-	+	-	-	-	-	+	-	-	-	-	-	+	-	-	+	-	-	-	-	+	+	-	-	-	-	-	-	+	-	-	-	-	-	+	-	-	-
-1180	-	+	-	-	+	+	-	-	+	+	+	-	+	-	-	-	-	+	-	-	-	-	-	+	-	-	+	-	-	+	-	+	+	-	-	-	+	-	-	+	-	-	-	-	-	+	-	-	-
-1170	-	+	-	-	+	+	-	-	+	+	+	-	-	-	-	-	-	+	-	-	-	-	-	+	-	-	+	-	-	+	-	+	+	-	-	-	+	-	-	+	-	-	-	-	-	+	-	-	-
-1160	-	+	-	-	+	+	-	-	+	+	+	-	-	-	-	-	-	+	-	-	-	-	-	+	-	-	+	-	-	+	-	+	+	-	-	-	+	-	-	+	-	-	-	-	-	+	+	-	-
-1150	-	+	-	-	+	+	-	-	+	+	+	-	-	-	-	-	-	+	-	-	-	-	-	+	-	-	+	-	-	+	-	+	-	-	-	-	+	-	-	+	-	-	-	-	-	+	+	-	-
-1140	-	+	-	-	+	+	-	-	+	+	+	-	-	-	-	-	-	+	-	-	-	-	-	+	-	-	+	-	-	+	-	+	-	-	-	-	+	-	-	+	-	-	-	-	-	+	+	-	-
-1130	-	+	-	-	-	+	-	-	+	+	+	-	-	-	+	-	-	+	-	-	-	-	-	+	-	-	+	-	-	+	-	+	-	-	-	-	+	-	-	+	-	-	-	-	-	+	+	-	-
-1120	-	+	-	-	-	+	-	-	+	+	+	-	-	-	+	+	-	+	-	-	+	-	-	+	-	-	+	-	-	+	-	+	-	-	-	-	+	-	-	+	-	-	-	-	-	+	+	-	-
-1110	-	+	-	-	-	+	-	-	+	+	+	-	-	-	+	+	-	+	-	-	+	-	-	+	-	-	+	-	-	+	-	+	-	-	-	-	+	-	-	+	-	-	-	-	-	+	+	-	-
-1100	-	+	-	-	-	+	-	-	+	+	+	-	-	-	+	+	-	+	-	-	+	-	-	+	-	-	+	-	-	+	-	+	-	-	-	-	+	-	-	+	-	-	-	-	-	+	+	-	-
-1090	-	+	-	-	-	+	-	-	+	+	+	-	-	-	+	+	-	+	-	-	+	-	-	+	-	-	+	-	-	+	-	+	-	-	-	-	+	-	-	+	-	-	-	-	-	+	+	+	-
-1080	-	+	-	-	-	+	-	-	+	+	+	-	-	-	+	+	-	+	-	-	+	-	-	+	-	-	+	-	-	+	-	+	-	-	+	-	+	-	-	+	-	-	-	-	-	+	+	+	-
-1070	-	+	-	-	-	+	-	-	+	+	+	-	-	-	+	+	-	+	-	-	+	-	-	+	-	-	+	-	-	+	-	-	-	-	+	-	+	-	-	+	-	-	-	-	-	+	+	+	-
-1060	-	+	-	-	-	+	-	-	+	+	+	-	-	-	+	+	-	+	-	-	+	-	-	+	-	-	+	-	-	+	-	-	-	-	+	-	+	-	-	+	-	-	-	-	-	+	+	+	-
-1050	-	+	-	-	-	+	-	-	+	+	+	-	-	-	+	+	-	+	-	-	+	-	-	+	-	-	+	-	-	+	-	-	-	-	+	-	+	-	-	+	-	-	-	-	-	+	+	+	-
-1040	-	+	-	-	-	+	-	-	+	+	+	-	-	-	+	+	-	+	-	-	+	-	-	+	-	-	+	-	-	+	-	-	+	-	+	-	+	-	-	+	-	-	-	-	-	-	+	+	-
-1030	-	+	-	-	-	+	-	-	+	+	+	-	-	-	+	+	-	+	-	-	+	-	-	+	-	-	+	-	-	+	-	-	+	-	+	-	+	-	-	+	-	-	-	-	-	-	+	+	-
-1020	-	+	-	-	-	+	-	-	+	+	+	-	+	-	+	+	-	+	-	+	+	-	-	+	-	-	+	-	-	+	-	-	+	-	+	-	+	-	-	+	-	-	-	-	-	-	+	+	-
-1010	-	+	-	-	-	+	-	-	+	+	+	-	+	-	+	+	-	+	-	+	+	-	-	+	-	-	+	-	-	+	-	-	+	-	+	-	+	-	-	+	+	-	-	-	-	-	+	+	-
-1000	-	+	-	-	-	+	-	-	+	+	+	-	+	-	+	+	-	+	-	+	+	-	-	+	-	-	+	-	-	+	-	-	+	-	+	-	+	-	-	+	+	-	-	-	-	-	+	+	-
-990	-	+	-	-	-	+	-	-	+	+	+	-	+	-	+	+	-	+	-	+	+	-	-	+	-	-	+	-	-	+	-	-	+	-	+	-	+	-	-	+	+	-	-	-	-	-	+	+	-
-980	-	+	-	-	-	+	-	-	+	+	+	-	+	-	+	+	-	+	-	+	+	-	-	+	-	-	+	-	-	-	-	-	+	-	+	-	+	-	-	+	+	-	-	-	-	-	+	-	-
-970	-	+	-	-	-	+	-	-	+	-	+	-	+	-	+	+	-	+	-	+	+	-	-	+	-	-	+	-	-	-	-	-	+	-	+	-	+	-	-	+	+	-	-	-	-	-	+	-	-
-960	-	+	-	-	-	+	-	-	+	-	+	-	+	-	+	+	-	+	-	+	-	-	+	+	-	-	+	-	-	-	-	-	+	-	+	-	+	-	-	+	+	-	-	-	-	-	+	-	-
-950	-	+	-	-	-	+	-	-	+	-	+	-	+	-	+	+	-	+	-	+	-	-	+	+	-	-	+	-	-	-	-	-	+	-	+	-	+	-	-	+	+	-	-	-	-	-	+	-	-
-940	-	+	-	-	-	+	-	-	+	-	+	-	+	-	+	+	-	+	-	+	-	-	+	+	-	-	+	-	-	-	-	-	+	-	+	-	+	-	-	+	+	-	-	-	-	-	+	-	-
-930	-	+	-	-	-	+	-	-	+	-	+	-	+	-	+	+	-	+	-	+	-	-	+	+	-	-	+	-	-	-	-	-	+	-	+	-	+	-	-	+	+	-	-	-	-	-	+	-	-
-920	-	+	-	-	-	+	-	-	+	-	+	-	+	-	+	+	-	+	-	+	-	-	+	+	-	-	+	-	-	-	-	-	+	-	+	-	+	-	-	+	+	-	-	-	-	-	-	-	-
-910	-	+	-	-	-	+	-	-	+	-	+	-	+	-	+	+	-	+	-	+	-	-	+	+	-	-	+	-	-	-	-	-	+	-	+	-	+	-	-	+	+	-	-	-	-	-	-	-	-
-900	-	+	-	-	-	+	-	-	+	-	+	-	+	-	-	+	-	+	-	+	-	-	+	+	+	-	+	-	-	-	-	-	+	-	+	-	+	-	-	+	+	-	-	-	-	-	-	-	-
-890	-	+	-	-	-	+	-	-	+	-	+	-	+	-	-	+	-	+	-	+	-	-	+	+	+	-	+	-	-	-	-	-	+	-	+	-	+	-	-	+	-	-	-	-	-	-	-	-	-
-880	-	+	-	-	-	+	-	-	+	-	+	-	+	-	-	+	-	+	-	+	-	-	+	+	+	-	+	-	-	-	-	-	+	-	+	-	+	-	-	+	-	-	-	-	-	-	-	-	-
-870	-	+	-	-	-	+	-	-	+	-	+	-	+	-	-	+	-	+	-	+	-	+	+	+	+	-	+	-	-	-	-	-	+	-	+	-	+	-	-	+	-	-	-	-	-	-	-	-	-
-860	-	+	-	-	-	+	-	-	+	-	+	-	+	-	-	+	-	+	-	+	-	+	+	+	+	-	+	-	-	-	-	-	+	+	+	-	+	-	-	+	-	-	-	-	-	-	-	-	-
-850	-	+	-	-	-	+	-	-	+	-	+	-	+	-	-	+	-	+	-	+	-	+	+	+	+	-	+	-	-	-	-	-	+	+	+	-	+	-	-	+	-	-	-	-	-	-	-	-	-
-840	-	+	-	-	-	+	-	-	+	-	+	-	+	-	-	+	-	+	-	+	-	+	+	+	+	-	+	-	-	-	-	-	+	+	+	-	+	-	-	+	-	-	-	-	-	-	-	-	-
-830	-	+	-	-	-	+	-	-	+	-	+	-	+	-	-	+	-	+	-	+	-	+	+	+	+	-	+	-	+	-	-	-	+	+	+	-	+	-	-	+	-	-	-	-	-	-	-	-	-
-820	-	+	-	-	-	+	-	-	+	-	+	-	+	-	-	+	-	+	-	+	-	+	+	+	+	-	+	-	+	-	-	-	+	+	-	-	+	-	-	+	-	-	-	-	-	-	-	-	-
-810	-	+	-	-	-	+	-	-	+	-	+	-	+	-	-	-	-	+	-	+	-	+	+	+	-	-	+	-	+	-	-	-	+	+	+	-	+	-	-	+	-	+	-	-	-	-	-	-	-
-800	-	+	-	-	-	+	-	-	+	-	+	-	+	-	-	-	-	+	-	+	-	+	-	+	-	-	+	-	+	-	-	-	+	+	+	-	+	-	-	-	-	+	-	-	-	-	-	-	-
-790	-	+	-	-	-	+	-	-	+	-	+	-	+	-	-	-	-	+	-	+	-	+	-	+	-	-	+	-	+	-	-	-	+	+	+	-	+	-	-	-	-	+	-	-	-	-	-	-	-
-780	-	+	-	-	-	+	-	-	+	-	+	-	+	-	-	-	-	+	-	+	-	+	-	-	-	-	+	-	+	-	-	-	+	+	+	-	+	-	-	-	-	+	-	-	-	-	-	-	-
-770	-	+	-	-	-	+	+	-	+	-	+	-	+	-	-	-	-	+	-	+	-	+	-	-	-	-	-	-	+	-	-	-	+	+	+	-	+	-	-	-	-	+	-	-	-	-	-	-	-
-760	-	+	-	-	-	+	+	-	+	-	+	-	+	-	-	+	-	+	-	+	-	+	-	-	-	-	-	-	+	-	-	-	+	+	+	-	+	-	-	-	-	+	-	-	-	-	-	-	-
-750	-	+	-	-	-	+	+	-	+	-	+	-	+	-	-	+	-	+	-	+	-	+	-	-	-	-	-	-	+	-	-	-	+	+	+	-	+	-	-	-	-	+	-	-	-	-	-	-	-
-740	-	+	-	-	-	+	+	-	+	-	+	-	+	-	-	+	-	+	-	+	-	+	-	-	-	-	-	-	+	-	-	-	+	+	+	-	+	-	-	-	-	+	-	-	-	-	-	+	-
-730	-	+	-	-	-	-	+	-	+	-	+	-	+	-	-	+	-	+	-	+	-	+	-	-	-	-	-	-	+	-	-	-	+	+	+	-	+	-	-	-	-	-	-	-	-	-	-	+	-
-720	-	+	-	-	-	-	+	-	+	-	+	-	+	-	-	+	-	+	-	+	-	+	-	+	-	-	-	-	+	-	-	-	+	+	+	-	+	-	-	-	-	-	-	-	-	-	-	+	-
-710	-	+	-	-	-	-	+	-	+	-	+	-	+	-	-	+	-	+	-	+	-	+	-	+	-	-	-	-	+	-	-	-	+	+	+	-	+	-	-	-	-	-	-	-	-	-	-	+	-
-700	-	+	-	-	-	-	+	-	+	-	-	-	+	-	-	+	-	+	-	+	-	+	-	+	-	-	-	-	+	-	-	-	+	+	+	-	+	-	-	-	-	-	-	-	-	-	-	+	-
-690	-	+	-	-	-	-	+	-	+	-	-	-	+	-	-	+	-	+	-	+	-	+	-	+	-	-	-	-	+	-	-	-	+	+	+	-	+	-	-	-	+	-	-	-	+	-	-	+	-
-680	-	+	-	-	-	-	+	-	+	-	-	-	+	-	-	+	-	+	-	+	-	+	-	+	-	-	-	-	+	-	-	-	+	+	+	-	+	-	-	-	+	-	-	-	+	-	-	+	-
-670	-	+	-	-	-	-	+	-	+	-	-	-	+	-	-	+	-	+	-	+	-	+	-	+	-	-	-	-	+	-	-	-	+	+	+	+	+	-	-	-	+	-	-	-	+	-	-	+	-
-660	-	+	-	-	-	-	+	-	+	-	-	-	+	-	-	+	-	+	-	+	-	-	-	+	-	+	-	-	+	-	-	-	+	+	+	+	+	-	-	-	+	-	-	-	+	-	-	+	-
-650	-	+	-	-	-	-	+	-	+	-	-	-	+	-	-	-	-	-	-	+	-	-	-	+	-	+	-	-	+	-	-	-	+	+	+	+	+	-	-	-	+	-	-	-	+	-	-	+	-
-640	-	+	-	-	-	-	+	-	+	-	-	-	+	-	-	-	-	-	-	+	-	-	-	+	-	+	-	-	+	-	-	-	+	+	-	+	+	-	-	-	+	-	-	-	+	-	-	+	-
-630	-	+	-	-	-	-	+	-	+	-	-	-	+	-	-	-	-	-	-	+	-	-	-	+	-	+	-	-	+	-	-	-	+	+	-	+	+	-	-	+	+	-	-	-	+	-	-	+	-
-620	-	+	-	-	-	-	+	-	+	-	-	-	+	-	-	-	-	-	-	+	-	-	-	+	-	+	-	+	+	-	-	-	+	-	-	+	-	-	-	+	+	-	-	-	+	-	-	+	-
-610	-	+	-	-	-	-	+	-	+	-	-	-	+	-	-	-	-	-	-	+	-	-	-	+	-	+	-	+	+	-	-	-	+	-	-	+	-	-	-	+	+	-	-	-	+	-	-	+	-
-600	-	+	-	-	-	-	+	-	+	-	-	-	+	-	-	-	-	-	-	+	-	-	-	+	-	+	-	+	-	+	-	-	+	-	-	+	-	-	-	+	+	-	-	-	+	-	-	+	-
-590	-	+	-	-	-	-	+	-	+	-	-	-	+	-	-	-	-	-	+	+	-	-	-	+	-	+	-	+	-	+	-	-	+	-	-	+	-	-	-	+	+	-	-	-	+	-	-	+	-
-580	-	+	-	-	-	-	-	-	+	-	-	-	+	+	-	-	-	-	+	+	-	-	-	+	-	+	-	+	-	+	-	-	+	-	-	+	-	-	-	+	+	-	-	-	+	-	-	+	-
-570	-	+	-	-	-	-	-	-	-	-	-	-	+	+	-	-	-	-	+	+	-	-	-	+	-	+	-	+	-	+	-	-	+	-	-	+	-	-	-	+	+	-	-	-	+	-	-	-	-
-560	-	+	-	-	-	-	+	-	-	-	-	-	+	+	-	-	-	-	+	+	-	-	-	+	-	+	-	+	-	+	-	-	+	-	-	+	-	-	-	+	+	-	-	-	+	-	-	-	-
-550	-	+	-	-	-	-	+	-	-	-	-	-	+	+	-	-	-	-	+	+	-	-	-	-	-	+	-	+	-	+	-	-	+	-	-	+	-	-	-	+	+	-	-	-	+	-	-	-	-
-540	-	+	-	-	-	-	+	-	-	-	-	-	+	+	-	-	-	-	+	+	-	-	-	-	-	+	-	+	-	-	-	-	+	-	-	+	-	-	-	+	+	-	-	-	+	-	-	-	-
-530	-	+	-	-	-	+	+	-	-	-	-	-	+	+	-	-	-	-	+	+	-	-	-	-	-	+	-	+	-	-	-	-	+	-	-	+	-	-	-	+	+	-	-	-	+	-	-	-	-
-520	-	+	-	-	-	+	+	-	-	-	-	-	-	+	-	-	-	-	+	+	-	-	-	-	-	+	-	+	-	-	-	-	+	-	-	+	-	-	-	+	+	-	-	-	+	-	-	-	-
-510	-	+	-	-	-	+	+	-	-	-	-	-	-	+	-	-	-	-	+	+	-	-	-	-	-	+	-	+	-	-	+	-	+	-	-	+	-	-	-	+	+	-	-	-	+	-	-	-	-
-500	-	+	-	-	-	+	+	-	-	-	-	-	-	+	-	-	-	-	+	+	-	-	-	-	-	+	-	+	-	-	+	-	+	-	-	+	-	-	-	+	+	-	-	-	+	-	-	-	-
-490	-	+	-	-	-	+	+	-	-	-	-	-	-	+	-	-	-	+	+	+	-	-	-	-	-	+	-	+	-	-	+	-	+	-	-	+	-	-	+	+	+	-	-	-	+	-	-	-	-
-480	-	+	-	-	-	+	+	-	-	-	-	-	-	+	-	-	-	+	+	+	-	-	-	-	-	+	+	+	-	-	+	-	+	+	-	+	-	-	+	+	-	-	-	-	+	-	-	-	-
-470	-	+	-	-	-	+	+	-	-	-	-	-	-	+	-	-	-	+	+	+	-	-	-	+	-	+	+	+	-	-	+	-	+	+	-	+	-	-	+	+	-	-	-	-	+	-	-	-	-
-460	-	+	-	-	-	+	+	-	-	-	-	-	-	+	-	-	-	+	+	-	-	-	-	+	-	-	+	+	-	-	+	-	-	+	-	+	-	-	+	-	-	-	-	-	+	-	-	-	-
-450	-	+	-	-	-	+	+	-	-	-	-	-	-	+	-	-	-	+	-	-	-	-	-	+	-	-	+	-	-	-	+	-	-	+	-	+	-	-	+	-	-	-	-	-	+	-	-	-	-
-440	-	+	-	-	-	+	+	-	-	-	-	-	-	+	-	-	-	+	-	-	-	-	-	+	-	-	+	-	-	-	+	-	-	+	-	+	-	-	+	-	-	-	-	-	+	-	-	-	-
-430	-	-	-	-	-	-	+	-	-	-	-	-	-	+	-	-	-	+	-	-	-	-	-	+	-	-	+	-	-	-	+	-	-	+	-	+	-	-	+	-	-	-	-	-	+	-	-	-	-
-420	-	-	-	-	-	-	+	-	-	-	-	-	-	+	-	-	-	+	-	-	-	-	-	+	-	-	-	-	-	-	+	-	-	+	-	+	-	-	+	-	-	-	-	-	-	-	-	-	-
-410	-	-	-	-	-	-	+	-	-	-	-	-	-	+	-	-	-	+	-	-	-	-	-	+	-	-	-	-	-	-	+	-	-	+	+	-	-	-	+	-	-	-	-	-	-	-	-	-	-
-400	-	-	-	-	-	-	+	-	-	-	-	-	-	+	-	-	-	+	-	-	-	-	-	+	-	-	-	-	-	-	+	-	-	+	+	-	-	-	+	-	-	-	-	-	-	-	-	-	-
-390	-	-	-	-	-	-	+	-	-	-	-	-	-	+	-	-	-	+	-	-	-	-	-	+	-	-	-	-	-	-	+	-	-	+	+	+	-	-	+	-	-	-	-	-	-	-	-	-	-
-380	-	-	-	-	-	-	+	-	-	-	-	-	-	+	-	-	-	+	-	-	-	-	-	+	-	-	-	-	-	-	+	-	-	+	+	+	+	-	+	-	-	-	-	-	-	-	-	-	-
-370	-	-	-	-	-	-	+	-	-	-	-	-	-	+	-	-	-	+	-	-	-	-	-	+	-	-	-	-	-	-	+	-	-	+	+	+	+	-	+	-	-	-	-	-	-	-	-	-	-
-360	-	-	-	-	-	-	+	-	-	-	-	-	-	+	-	-	-	+	-	-	-	-	-	+	-	-	-	-	-	-	+	-	-	+	+	+	+	-	+	-	-	-	-	-	-	-	-	-	-
-350	-	-	-	-	-	-	+	-	-	-	-	-	-	+	-	-	-	+	-	-	-	-	-	+	-	-	-	-	-	-	+	-	-	+	+	+	+	-	+	-	-	-	-	-	-	-	-	-	-
-340	-	-	-	-	-	-	+	-	-	-	-	-	-	+	-	-	-	+	-	-	-	-	-	+	-	-	-	-	-	-	+	-	-	-	+	+	+	-	+	-	-	-	-	-	-	-	-	-	-
-330	-	-	-	-	-	-	+	-	-	-	-	-	-	+	-	-	-	+	-	-	-	-	-	+	+	-	-	-	-	-	+	-	-	-	+	+	+	-	+	-	-	-	-	-	-	-	-	-	-
-320	-	-	-	-	-	-	+	-	-	-	-	-	-	-	-	-	-	+	-	-	-	-	-	+	+	-	-	-	-	-	+	-	-	-	+	+	+	-	+	-	-	-	-	-	-	-	-	-	-
-310	-	-	-	-	-	-	+	-	-	-	-	-	-	-	-	-	-	+	-	-	-	-	-	+	+	-	-	-	-	-	-	-	-	-	+	+	+	-	+	-	-	-	-	-	-	-	-	-	-
-300	-	-	-	-	-	-	-	-	-	-	-	-	-	-	-	-	-	+	-	-	-	-	-	+	+	-	-	-	-	-	-	-	-	-	+	+	+	-	+	-	-	-	-	-	-	-	-	-	-
-290	-	-	-	-	-	-	-	-	-	-	-	-	-	-	-	-	-	+	-	-	-	-	-	+	+	-	-	-	-	-	-	-	-	-	+	+	+	-	+	-	-	-	-	-	-	-	-	-	-
-280	-	-	-	-	-	-	-	-	-	-	-	-	-	-	-	-	-	+	-	-	-	-	-	+	+	-	-	-	-	-	-	-	-	-	+	+	+	-	+	-	-	-	-	-	-	-	-	-	-
-270	-	-	-	-	-	-	-	-	-	-	-	-	-	-	-	-	-	+	-	-	-	-	-	+	+	-	-	-	-	-	-	-	-	-	+	+	-	-	+	-	-	-	-	-	-	-	-	-	-
-260	-	-	-	-	-	-	-	-	-	-	-	-	-	-	-	-	-	+	-	-	-	-	-	+	+	-	-	-	-	-	-	-	-	-	+	+	-	-	+	-	-	-	-	-	-	-	-	-	-
-250	-	-	-	-	-	-	-	-	-	-	-	-	-	-	-	-	-	+	-	-	-	-	-	+	+	-	-	-	-	-	-	-	-	-	+	+	-	-	+	-	-	-	-	-	-	-	-	-	-
-240	-	-	-	-	-	-	-	-	-	-	-	-	-	-	-	-	-	-	-	-	-	-	-	+	+	-	-	-	-	-	-	-	-	-	+	+	-	-	+	-	-	-	-	-	-	-	-	-	-
-230	-	-	-	-	-	-	-	-	-	-	-	-	-	-	-	-	-	-	-	-	-	-	-	+	+	-	-	-	-	-	-	-	-	-	+	-	-	-	-	-	-	-	-	-	-	-	-	-	-
-220	-	-	-	-	-	-	-	-	-	-	-	-	-	-	-	-	-	-	-	-	-	-	-	+	+	-	-	-	-	-	-	-	-	-	+	-	-	-	-	-	-	-	-	-	-	-	-	-	-
-210	-	-	-	-	+	-	-	-	-	-	-	-	-	-	-	-	-	-	-	-	-	-	-	+	+	-	-	-	-	-	-	-	-	-	+	-	-	-	-	-	-	-	-	-	-	-	-	-	-
-200	-	-	-	-	+	-	-	-	-	-	-	-	-	-	-	-	-	-	-	-	-	-	-	-	+	-	-	-	-	-	-	-	-	-	+	-	-	-	-	-	-	-	-	-	-	-	-	-	-
-190	-	-	-	-	+	-	-	-	-	-	-	-	-	-	-	-	-	-	-	-	-	-	-	-	+	-	-	-	-	-	-	-	-	-	+	-	-	-	-	-	-	-	-	-	-	-	-	-	-
-180	-	-	-	-	+	-	-	-	-	-	-	-	-	-	-	-	-	-	-	-	-	-	-	-	+	-	-	-	-	-	-	-	-	-	+	-	-	-	-	-	-	-	-	-	-	-	-	-	-
-170	-	-	-	-	+	-	-	-	-	-	-	-	-	-	-	-	-	-	-	-	-	-	-	-	+	-	-	-	-	-	-	-	-	-	+	-	-	-	-	-	-	-	-	-	-	-	-	-	-
-160	-	-	-	-	+	-	-	-	-	-	-	-	-	-	-	-	-	-	-	-	-	-	-	-	-	-	-	-	-	-	-	-	-	-	+	-	-	-	-	-	-	-	-	-	-	-	-	-	-
-150	-	-	-	-	+	+	-	-	-	-	-	-	-	-	-	-	-	-	-	-	-	-	-	-	-	-	-	-	-	-	-	-	-	-	+	-	-	-	-	-	-	-	-	-	-	-	-	-	-
-140	-	-	-	-	+	+	-	-	-	-	-	-	-	-	-	-	-	-	-	-	-	-	-	-	-	-	-	-	-	-	-	-	-	-	+	-	-	-	-	-	-	-	-	-	-	-	-	-	-
-130	-	-	-	-	+	+	-	-	-	-	-	-	-	-	-	-	-	-	-	-	-	-	-	-	-	-	-	-	-	-	-	-	-	-	+	-	-	-	-	-	-	-	-	-	-	-	-	-	-
-120	-	-	-	-	+	+	-	-	-	-	-	-	-	-	-	-	-	-	-	-	-	-	-	-	-	-	-	-	-	-	-	-	-	-	+	-	-	-	-	-	-	-	-	-	-	-	-	-	-
-110	-	-	-	-	+	+	-	-	-	-	-	-	-	-	-	-	-	-	-	-	-	-	-	-	-	-	-	-	-	-	-	-	-	-	+	-	-	-	-	-	-	-	-	-	-	-	-	-	-
-100	-	-	-	-	+	+	-	-	-	-	-	-	-	-	-	-	-	-	-	-	-	-	-	-	-	-	-	-	-	-	-	-	-	-	+	-	-	-	-	-	-	-	-	-	-	-	-	-	-
-90	-	-	-	-	+	+	-	-	-	-	-	-	-	-	-	-	-	-	-	-	-	-	-	-	-	-	-	-	-	-	-	-	-	-	+	-	-	-	-	-	-	-	-	-	-	-	-	-	-
-80	-	-	-	-	+	+	-	-	-	-	-	-	-	-	-	-	-	-	-	-	-	-	-	-	-	-	-	-	-	-	-	-	-	-	+	-	-	-	-	-	-	-	-	-	-	-	-	-	-
-70	-	-	-	-	+	+	-	-	-	-	-	-	-	-	-	-	-	-	-	-	-	-	-	-	-	-	-	-	-	-	-	-	-	-	+	-	-	-	-	-	-	-	-	-	-	-	-	-	-
-60	-	-	-	-	+	+	-	-	-	-	-	-	-	-	-	-	-	-	-	-	-	-	-	-	-	-	-	-	-	-	-	-	-	-	+	-	-	-	-	-	-	-	-	-	-	-	-	-	-
-50	-	-	-	-	+	+	-	-	-	-	-	-	-	-	-	-	-	-	-	-	-	-	-	-	-	-	-	-	-	-	-	-	-	-	+	-	-	-	-	-	-	-	-	-	-	-	-	-	-
-40	-	-	-	-	-	+	-	-	-	-	-	-	-	-	-	-	-	-	-	-	-	-	-	-	-	-	-	-	-	-	-	-	-	-	+	-	-	-	-	-	-	-	-	-	-	-	-	-	-
-30	-	-	-	-	-	+	-	-	-	-	-	-	-	-	-	-	-	-	-	-	-	-	-	-	-	-	-	-	-	-	-	-	-	-	+	-	-	-	-	-	-	-	-	-	-	-	-	-	-
-20	-	-	-	-	-	+	-	-	-	-	-	-	-	-	-	-	-	-	-	-	-	-	-	-	-	-	-	-	-	-	-	-	-	-	+	-	-	-	-	-	-	-	-	-	-	-	-	-	-
-10	-	-	-	-	-	+	-	-	-	-	-	-	-	-	-	-	-	-	-	-	-	-	-	-	-	-	-	-	-	-	-	-	-	-	+	-	-	-	-	-	-	-	-	-	-	-	-	-	-
0	-	-	-	-	-	+	-	-	-	-	-	-	-	-	-	-	-	-	-	-	-	-	-	-	-	-	-	-	-	-	-	-	-	-	+	-	-	-	-	-	-	-	-	-	-	-	-	-	-
10	-	-	-	-	-	+	-	-	-	-	-	-	-	-	-	-	-	-	-	-	-	-	-	-	-	-	-	-	-	-	-	-	-	-	+	-	-	-	-	-	-	-	-	-	-	-	-	-	-
20	-	-	-	-	-	-	-	-	-	-	-	-	-	-	-	-	-	-	-	-	-	-	-	-	-	-	-	-	-	-	-	-	-	-	+	-	-	-	-	-	-	-	-	-	-	-	-	-	-
30	-	-	-	-	-	-	-	-	-	-	-	-	-	-	-	-	-	-	-	-	-	-	-	-	-	-	-	-	-	-	-	-	-	-	+	-	-	-	-	-	-	-	-	-	-	-	-	-	-
40	-	-	-	-	-	-	-	-	-	-	-	-	-	-	-	-	-	-	-	-	-	-	-	-	-	-	-	-	-	-	-	-	-	-	+	-	-	-	-	-	-	-	-	-	-	-	-	-	-
50	-	-	-	-	-	-	-	-	-	-	-	-	-	-	-	-	-	-	-	-	-	-	-	-	-	-	-	-	-	-	-	-	-	-	+	-	-	-	-	-	-	-	-	-	-	-	-	-	-
60	-	-	-	-	-	-	-	-	-	-	-	-	-	-	-	-	-	-	-	-	-	-	-	-	-	-	-	-	-	-	-	-	-	-	-	-	-	-	-	-	-	-	-	-	-	-	-	-	-
70	-	-	-	-	-	-	-	-	-	-	-	-	-	-	-	-	-	-	-	-	-	-	-	-	-	-	-	-	-	-	-	-	-	-	-	-	-	-	-	-	-	-	-	-	-	-	-	-	-
80	-	-	-	-	-	-	-	-	-	-	-	-	-	-	-	-	-	-	-	-	-	-	-	-	-	-	-	-	-	-	-	-	-	-	-	-	-	-	-	-	-	-	-	-	-	-	-	-	-
90	-	-	-	-	-	-	-	-	-	-	-	-	-	-	-	-	-	-	-	-	-	-	-	-	-	-	-	-	-	-	-	-	-	-	-	-	-	-	-	-	-	-	-	-	-	-	-	-	-
100	-	-	-	-	-	-	-	-	-	-	-	-	-	-	-	-	-	-	-	-	-	-	-	-	-	-	-	-	-	-	-	-	-	-	-	-	-	-	-	-	-	-	-	-	-	-	-	-	-
110	-	-	-	-	-	-	-	-	-	-	-	-	-	-	-	-	-	-	-	-	-	-	-	-	-	-	-	-	-	-	-	-	-	-	-	-	-	-	-	-	-	-	-	-	-	-	-	-	-
120	-	-	-	-	-	-	-	-	-	-	-	-	-	-	-	-	-	-	-	-	-	-	-	-	-	-	-	-	-	-	-	-	-	-	-	-	-	-	-	-	-	+	-	-	-	-	-	-	-
130	-	-	-	-	-	-	-	-	-	-	-	-	-	-	-	-	-	-	-	-	-	-	-	-	-	-	-	-	-	-	-	-	-	-	-	-	-	-	-	-	-	+	-	-	-	-	-	-	-
140	-	-	-	-	-	-	-	-	-	-	-	-	-	-	-	-	-	-	-	-	-	-	-	-	-	-	-	-	-	-	-	-	-	-	-	-	-	-	-	-	-	+	-	-	-	-	-	-	-
150	-	-	-	-	-	-	-	-	-	-	-	-	-	-	-	-	-	-	-	-	-	-	-	-	-	-	-	-	-	-	-	-	-	-	-	-	-	-	-	-	-	+	-	-	-	-	-	-	-
160	-	-	-	-	-	-	-	-	-	-	-	-	-	-	-	-	-	-	-	-	-	-	-	-	-	-	-	-	-	-	-	-	-	-	-	-	-	-	-	-	-	+	-	-	-	-	-	-	-
170	-	-	-	-	-	-	-	-	-	-	-	-	-	-	-	-	-	-	-	-	-	-	-	-	-	-	-	-	-	-	-	-	-	-	-	-	-	-	-	-	-	+	-	-	-	-	-	-	-
180	-	-	-	-	-	-	-	-	-	-	-	-	-	-	-	-	-	-	-	-	-	-	-	-	-	-	-	-	-	-	-	-	-	-	-	-	-	-	-	-	-	+	-	-	-	-	-	-	-
190	-	-	-	-	-	-	-	-	-	-	-	-	-	-	-	-	-	-	-	-	-	-	-	-	-	-	-	-	-	-	-	-	-	-	-	-	-	-	-	-	-	+	-	-	-	-	-	-	-
200	-	-	-	-	-	-	-	-	-	-	-	-	-	-	-	-	-	-	-	-	-	-	-	-	-	-	-	-	-	-	-	-	-	-	-	-	-	-	-	-	-	+	-	-	-	-	-	-	-
210	-	-	-	-	-	-	-	-	-	-	-	-	-	-	-	-	-	-	-	-	-	-	-	-	-	-	-	-	-	-	-	-	-	-	-	-	-	-	-	-	-	+	-	-	-	-	-	+	-
220	-	-	-	-	-	-	-	-	-	-	-	-	-	-	-	-	-	-	-	-	-	-	-	-	-	-	-	-	-	-	-	-	-	-	-	-	-	-	-	-	-	+	-	-	-	-	-	+	-
230	-	-	-	-	-	-	-	-	-	-	-	-	-	-	-	-	-	-	-	-	-	-	-	-	-	-	-	-	-	-	-	-	-	-	-	-	-	-	-	-	-	+	-	-	-	-	-	+	-
240	-	-	-	-	-	-	-	-	-	-	-	-	-	-	-	-	-	-	-	-	-	-	-	-	-	-	-	-	-	-	-	-	-	-	-	-	-	-	-	-	-	+	-	-	-	-	-	+	-
250	-	-	-	-	-	-	-	-	-	-	-	-	-	-	-	-	-	-	-	-	-	-	+	-	-	-	-	-	-	-	-	-	-	-	-	-	-	-	-	-	-	+	-	-	-	-	-	+	-
260	-	-	-	-	-	-	-	-	-	-	-	-	-	-	-	-	-	-	-	-	-	-	+	-	-	-	-	-	-	-	-	-	-	-	-	-	-	-	-	-	-	+	-	-	-	-	-	+	-
270	-	-	-	-	-	-	-	-	-	-	-	-	-	-	-	-	-	-	-	-	-	-	+	-	-	-	-	-	-	-	-	-	-	-	-	-	-	-	-	-	-	+	-	-	-	-	-	+	-
280	-	-	-	-	-	-	-	-	-	-	-	-	-	-	-	-	-	-	-	-	-	-	+	-	-	-	-	-	-	-	-	-	-	-	-	-	-	-	-	-	-	+	-	-	-	-	-	+	-
290	-	-	-	-	-	-	-	-	-	-	-	-	-	-	-	-	-	-	-	-	-	-	+	-	-	-	-	-	-	-	-	-	-	-	-	-	-	-	-	-	-	+	-	-	-	-	-	+	-
300	-	-	-	-	-	-	-	-	-	-	-	-	-	-	-	-	-	-	-	-	-	-	+	-	-	-	-	-	-	-	-	-	-	-	-	-	-	-	-	-	-	+	-	-	-	-	-	+	-
310	-	-	-	-	-	-	-	-	-	-	-	-	-	-	-	-	-	-	-	-	-	-	+	-	-	-	-	-	-	-	-	-	-	-	-	-	-	-	-	-	-	+	-	-	-	-	-	+	-
320	-	-	-	-	-	-	-	-	-	-	-	-	-	-	-	-	-	-	-	-	-	-	+	-	-	-	-	-	-	-	-	-	-	-	-	-	-	-	-	-	-	+	-	-	-	-	-	-	-
330	-	-	-	-	-	-	-	-	-	-	-	-	-	-	-	-	-	-	-	-	-	-	+	-	-	-	-	-	-	-	-	-	-	-	-	-	-	-	-	-	-	+	-	-	-	-	-	-	-
340	-	-	-	-	+	-	-	-	-	-	-	-	-	-	-	-	-	-	-	-	-	-	+	-	-	-	-	-	-	-	-	-	-	-	-	-	-	-	-	-	-	+	-	-	-	-	-	-	-
350	-	-	-	-	+	-	-	-	-	-	-	-	-	-	-	-	-	-	-	-	-	-	+	-	-	-	-	-	-	-	-	-	-	-	-	-	-	-	-	-	+	+	-	-	-	-	-	-	-
360	-	-	-	-	+	-	-	-	-	-	-	-	-	-	-	-	-	-	-	-	-	-	+	-	-	-	-	-	-	-	-	-	-	-	-	-	-	-	-	-	+	+	-	-	-	-	-	-	-
370	-	-	-	-	+	-	-	-	-	-	-	-	-	-	-	-	-	-	-	-	-	-	+	-	-	-	-	-	-	-	-	-	-	-	-	-	-	-	-	-	+	+	-	-	-	-	-	-	-
380	-	-	-	-	+	-	-	-	-	-	-	-	-	-	-	-	-	-	-	-	-	-	+	-	-	-	-	-	-	-	-	-	-	-	-	-	-	-	-	-	+	+	-	-	-	-	-	-	-
390	-	-	-	-	+	-	-	-	-	-	-	-	-	-	-	-	-	-	-	-	-	-	+	-	-	-	-	-	-	-	-	-	-	-	-	-	-	-	-	-	+	+	-	-	-	-	-	-	-
400	-	-	-	-	+	-	-	-	-	-	-	-	-	-	-	-	-	-	-	-	-	-	+	-	-	-	-	-	-	-	-	-	-	-	-	-	-	-	-	-	+	+	-	-	-	-	-	-	-
410	-	-	-	-	-	-	-	-	-	-	-	-	-	-	-	-	-	-	-	-	-	-	+	-	-	-	-	-	-	-	-	-	-	-	-	-	-	-	-	-	+	+	-	-	-	-	-	-	-
420	-	-	-	-	-	-	-	-	-	-	-	-	-	-	-	-	-	-	-	-	-	-	+	-	-	-	-	-	-	-	-	-	-	-	-	-	-	-	-	-	+	+	-	-	-	-	-	-	-
430	-	-	-	-	-	-	-	-	-	-	-	-	-	-	-	-	-	-	-	-	-	-	+	-	-	-	-	-	-	-	-	-	-	-	-	-	-	-	-	-	+	+	-	-	-	-	-	-	-
440	-	-	-	-	-	-	-	-	-	-	-	-	-	-	-	-	-	-	-	-	-	-	+	-	-	-	-	-	-	-	-	-	-	-	-	-	-	-	-	-	+	+	-	-	-	-	-	-	-
450	-	-	-	-	-	-	-	-	-	-	-	-	-	-	-	-	-	-	-	-	-	-	+	-	-	-	-	-	-	-	-	-	-	-	-	-	-	-	-	-	+	+	-	-	-	-	-	-	-
460	-	-	-	-	-	-	-	-	-	-	-	-	-	-	-	-	-	-	-	-	-	-	+	-	-	-	-	-	-	-	+	-	-	-	-	-	-	-	-	-	+	+	-	-	-	-	-	-	-
470	-	-	-	-	-	-	-	-	-	-	-	-	-	-	-	-	-	-	-	-	-	-	+	-	-	-	-	-	-	-	+	-	-	-	-	-	-	-	-	-	-	+	-	-	-	-	-	-	-
480	-	-	-	-	+	-	-	-	-	-	-	-	-	-	-	-	-	-	-	-	-	-	+	-	-	-	-	-	-	-	+	-	-	-	-	-	-	-	-	-	-	+	-	-	-	-	-	-	-
490	-	-	-	-	+	-	-	-	-	-	-	-	-	-	-	-	-	-	-	-	-	-	+	-	-	-	-	-	-	-	+	-	-	-	-	-	-	-	-	-	-	+	-	-	-	-	-	+	-
500	-	-	-	-	+	-	-	-	-	-	-	-	-	-	-	-	-	-	-	-	-	-	+	-	-	-	-	-	-	-	+	-	-	-	-	-	-	-	-	-	-	+	-	-	-	-	-	+	-
Repeats in 3' downstream
24-PHAS Loci	24-PHAS_chr2_1	24-PHAS_chr2_2	24-PHAS_chr2_3	24-PHAS_chr2_4	24-PHAS_chr2_5	24-PHAS_chr2_6	24-PHAS_chr2_7	24-PHAS_chr3_8	24-PHAS_chr4_11	24-PHAS_chr4_12	24-PHAS_chr4_13	24-PHAS_chr5_14	24-PHAS_chr5_15	24-PHAS_chr5_16	24-PHAS_chr5_17	24-PHAS_chr5_18	24-PHAS_chr5_19	24-PHAS_chr5_20	24-PHAS_chr5_21	24-PHAS_chr6_22	24-PHAS_chr6_24	24-PHAS_chr6_25	24-PHAS_chr6_26	24-PHAS_chr6_27	24-PHAS_chr6_28	24-PHAS_chr6_29	24-PHAS_chr6_30	24-PHAS_chr6_31	24-PHAS_chr6_32	24-PHAS_chr6_33	24-PHAS_chr6_34	24-PHAS_chr6_35	24-PHAS_chr6_36	24-PHAS_chr6_37	24-PHAS_chr6_38	24-PHAS_chr6_39	24-PHAS_chr6_40	24-PHAS_chr7_41	24-PHAS_chr7_43	24-PHAS_chr7_44	24-PHAS_chr7_45	24-PHAS_chr7_46	24-PHAS_chr7_47	24-PHAS_chr7_48	24-PHAS_chr7_49	24-PHAS_chr7_50	24-PHAS_chr8_51	24-PHAS_chr8_52	24-PHAS_chr8_53
Position (10 bp window)
-500	+	-	-	-	-	-	-	-	-	-	-	-	-	-	-	-	-	-	-	-	+	-	-	-	-	-	-	-	-	-	-	-	+	-	-	-	-	-	+	-	-	+	-	-	-	-	-	-	-
-490	+	-	-	-	-	-	-	-	-	-	-	-	-	-	-	-	-	-	-	-	+	-	-	-	-	-	-	-	-	-	-	-	+	-	-	-	-	-	+	-	-	+	-	-	-	-	-	+	-
-480	+	-	-	-	-	-	-	-	-	-	-	-	-	-	-	-	-	-	-	-	+	-	-	-	-	-	-	-	-	-	-	-	+	-	-	-	-	-	+	-	-	+	-	-	-	-	-	+	-
-470	+	-	-	-	-	-	-	-	-	-	-	-	-	-	-	-	-	-	-	-	+	-	-	-	-	-	-	-	-	-	-	-	+	-	-	-	-	-	+	-	-	+	-	-	-	-	-	+	-
-460	+	-	-	-	-	-	-	-	-	-	-	-	-	-	-	-	-	-	-	-	+	-	+	-	-	-	-	-	-	-	-	-	+	-	-	-	-	-	+	-	-	+	-	-	-	-	-	+	-
-450	+	-	-	-	-	-	-	-	-	-	-	-	-	-	-	-	-	-	-	-	+	-	+	-	-	-	-	-	-	-	-	-	+	-	-	-	-	-	+	-	-	+	-	-	-	-	-	+	-
-440	+	-	-	-	-	-	-	-	-	-	-	-	-	-	-	-	-	-	-	-	+	-	+	-	-	-	-	-	-	-	-	-	+	-	-	-	-	-	+	-	-	+	-	-	-	-	-	+	-
-430	+	-	-	-	-	-	-	-	-	-	-	-	-	-	-	+	-	-	-	-	+	-	+	-	-	-	-	-	-	-	-	-	+	-	-	-	-	-	+	-	-	+	-	-	-	-	-	+	-
-420	+	-	-	-	-	-	-	-	-	-	-	-	-	-	-	+	-	-	-	-	+	-	+	-	-	-	-	-	-	-	-	-	+	-	-	-	-	-	+	-	-	-	-	-	-	-	-	+	-
-410	+	-	-	-	-	-	-	-	-	-	-	-	-	-	-	+	-	-	-	-	+	-	+	-	-	-	-	-	-	-	-	-	+	-	-	-	-	-	+	-	-	-	-	-	-	-	-	+	-
-400	+	-	-	-	-	-	-	-	-	-	-	-	-	-	-	+	-	-	-	-	+	-	+	-	-	-	-	-	-	-	-	-	+	-	-	-	-	-	+	-	-	-	-	-	-	-	-	+	-
-390	+	-	-	-	-	-	-	-	-	-	-	-	-	-	-	+	-	-	-	-	+	-	+	-	-	-	-	-	-	-	-	-	-	-	-	-	-	-	+	-	-	-	-	-	-	-	-	+	-
-380	+	-	-	-	+	-	-	-	-	-	-	-	-	-	-	+	-	-	-	-	+	-	+	-	-	-	-	-	-	-	-	-	-	-	-	-	-	-	+	-	-	-	-	-	-	-	-	+	-
-370	+	-	-	-	+	-	-	-	-	-	-	-	-	-	-	+	-	-	-	-	+	-	+	-	-	-	-	-	-	-	-	-	-	-	-	-	-	-	+	-	-	-	-	-	-	-	-	+	-
-360	+	-	-	-	+	-	-	-	-	-	-	-	-	-	-	+	-	-	-	-	+	-	+	-	-	-	-	-	-	-	-	-	-	-	-	-	-	-	+	-	-	-	-	-	-	-	-	+	-
-350	+	-	-	-	+	-	-	-	-	-	-	-	-	-	-	+	-	-	-	-	+	-	+	-	-	-	-	-	-	-	-	-	-	-	-	-	-	-	+	-	-	-	-	-	-	-	-	+	-
-340	+	-	-	-	+	-	-	-	-	-	-	-	-	-	-	+	-	-	-	-	+	-	+	-	-	-	-	-	-	-	-	-	-	-	-	-	-	-	+	-	-	-	-	-	-	-	-	+	-
-330	+	-	-	-	+	-	-	-	-	-	-	-	-	-	-	+	-	-	-	-	+	-	+	-	-	-	-	-	-	-	-	-	-	-	-	-	-	-	+	-	-	-	-	-	-	-	-	+	-
-320	+	-	-	-	-	-	-	-	-	-	-	-	-	-	-	+	-	-	-	-	+	-	+	-	-	-	-	-	-	-	-	-	-	-	-	-	-	-	+	-	-	-	-	-	-	-	-	+	-
-310	+	-	-	-	-	-	-	-	-	-	-	-	-	-	-	+	-	-	-	-	+	-	+	-	-	-	-	-	+	-	-	-	-	-	-	-	-	-	+	-	-	-	-	-	-	-	-	+	-
-300	+	-	-	-	-	-	-	-	-	-	-	-	-	-	-	+	-	-	-	-	+	-	+	-	-	-	-	-	+	-	-	-	-	-	-	-	-	-	+	-	-	-	-	-	-	-	-	+	-
-290	+	-	-	-	-	-	-	-	-	-	-	-	-	-	-	+	-	-	-	-	+	-	+	-	-	-	-	-	+	-	-	-	-	-	-	-	-	-	+	-	-	-	-	-	-	-	-	+	-
-280	+	-	-	-	-	-	-	-	-	-	-	-	-	-	-	+	-	-	-	-	+	-	+	-	-	-	-	-	+	-	-	-	-	-	-	-	-	-	+	-	-	-	-	-	-	-	-	+	-
-270	+	-	-	-	-	-	-	-	-	-	-	-	-	-	-	+	-	-	-	-	+	-	+	-	-	-	-	-	+	-	-	-	-	-	-	-	-	-	+	-	-	-	-	-	-	-	-	+	-
-260	+	-	-	-	-	-	-	-	-	-	-	-	-	-	-	+	-	-	-	-	+	-	+	-	-	-	-	-	+	-	-	-	-	-	-	-	-	-	+	-	-	-	-	-	-	-	-	+	-
-250	+	-	-	-	+	-	-	-	-	-	-	-	-	-	-	+	-	-	-	-	+	-	+	-	-	-	-	-	+	-	-	-	-	-	-	-	-	-	+	-	-	-	-	-	-	-	-	+	-
-240	+	-	-	-	+	-	-	-	-	-	-	-	-	-	-	+	-	-	-	-	+	-	+	-	-	-	-	-	+	-	+	-	-	-	-	-	-	-	+	-	-	-	-	-	-	-	-	+	-
-230	+	-	-	-	+	-	-	-	-	-	-	-	-	-	-	+	-	-	-	-	+	-	+	-	-	-	-	-	+	-	+	-	-	-	-	-	-	-	+	-	-	-	-	-	-	-	-	+	-
-220	+	-	-	-	+	-	-	-	-	-	-	-	-	-	-	+	-	-	-	-	+	-	+	-	-	-	-	-	+	-	+	-	-	-	-	-	-	-	+	-	-	-	-	-	-	-	-	+	-
-210	+	-	-	-	+	-	-	-	-	-	-	-	-	-	-	+	-	-	-	-	+	-	+	-	-	-	-	-	+	-	+	-	-	-	-	-	-	-	+	-	-	-	-	-	-	-	-	+	-
-200	+	-	-	-	+	-	-	-	-	-	-	-	-	-	-	+	-	-	-	-	+	-	+	-	-	-	-	-	+	-	+	-	-	-	-	-	-	-	+	-	-	-	-	-	-	-	-	+	-
-190	+	-	-	-	+	-	-	-	-	-	-	-	-	-	-	+	-	-	-	-	+	-	+	-	-	-	-	-	+	-	+	-	-	-	-	-	-	-	+	-	-	-	-	-	-	-	-	+	-
-180	+	-	-	-	+	-	-	-	-	-	-	-	-	-	-	+	-	-	-	-	+	-	+	-	-	-	-	-	+	-	+	-	-	-	-	-	-	-	+	-	-	-	-	-	-	-	-	+	-
-170	+	-	-	-	+	-	-	-	-	-	-	-	-	-	-	+	-	-	-	-	+	-	+	-	-	-	-	-	+	-	+	-	-	-	-	-	-	-	+	-	-	-	+	-	-	-	-	+	-
-160	+	-	-	-	+	-	-	-	+	-	-	-	-	-	-	+	-	-	-	-	+	-	+	-	-	-	-	-	+	-	+	-	-	-	-	-	-	-	+	-	-	-	+	-	-	-	-	+	-
-150	+	-	+	-	+	-	-	-	+	-	-	-	-	-	-	+	-	-	-	-	+	-	+	-	-	-	-	-	+	-	+	-	-	-	-	-	-	-	+	-	-	-	+	-	-	-	-	+	-
-140	+	-	+	-	+	-	-	-	+	-	-	-	-	-	-	+	-	-	-	-	+	-	+	-	-	-	-	-	+	-	+	-	-	-	-	-	-	-	+	-	-	-	+	-	-	-	-	+	-
-130	+	-	+	-	+	-	-	-	+	-	-	-	-	-	-	+	-	-	-	-	+	-	+	-	-	-	-	-	+	-	+	-	-	-	-	-	-	-	+	-	-	-	+	-	-	-	-	+	-
-120	+	-	+	-	-	-	-	-	+	-	-	-	-	-	-	+	-	-	-	-	+	-	+	-	-	-	-	-	+	-	+	-	-	-	-	-	-	-	+	-	-	-	+	-	-	-	-	+	-
-110	+	-	+	-	-	-	-	-	+	-	-	-	-	-	-	+	-	-	-	-	+	-	-	-	-	-	-	-	+	-	+	-	-	+	-	-	-	-	+	-	-	-	+	-	-	-	-	+	-
-100	+	-	+	-	-	-	-	-	+	-	-	-	-	-	-	+	-	-	-	-	+	-	-	-	-	-	-	-	+	-	+	-	-	+	-	-	-	-	+	+	-	-	+	-	-	-	-	+	-
-90	+	-	+	-	-	-	-	-	+	-	-	-	-	-	-	+	-	-	-	-	+	-	-	-	-	-	-	-	+	-	+	-	-	+	-	-	-	-	+	+	-	-	+	-	-	-	-	+	-
-80	+	-	+	-	-	-	-	-	+	-	-	-	-	-	-	+	-	-	-	-	+	-	-	-	-	-	-	-	+	-	+	-	-	+	-	-	-	-	+	+	-	-	+	-	-	-	-	+	-
-70	+	-	+	-	-	-	-	-	+	-	-	-	-	-	-	+	-	-	-	-	+	-	-	-	-	-	-	-	+	-	+	-	-	+	-	-	-	-	+	+	-	-	+	-	-	-	-	+	-
-60	+	-	+	-	-	-	-	-	+	-	-	-	-	-	-	+	-	-	-	-	+	-	-	-	-	-	-	-	+	-	-	-	-	+	-	-	-	-	+	+	-	-	+	-	-	-	-	+	-
-50	+	-	+	-	-	-	-	-	+	-	-	-	-	-	-	+	-	-	-	-	+	-	-	-	-	-	-	-	+	-	-	-	-	+	-	+	-	-	+	+	-	-	+	-	-	-	-	+	-
-40	+	-	+	-	-	-	-	-	+	-	-	-	-	-	-	+	-	-	-	-	+	-	-	-	-	-	-	-	+	-	-	-	-	+	-	+	-	-	+	+	-	-	+	-	-	-	-	+	-
-30	+	-	+	-	-	-	-	-	+	-	-	-	-	-	-	+	-	-	-	-	+	-	-	-	-	-	-	-	+	-	-	-	-	+	-	+	-	-	+	+	-	-	+	-	-	-	-	+	-
-20	+	-	+	-	-	-	-	-	+	-	-	-	-	-	-	+	-	-	-	-	+	-	-	-	-	-	-	-	+	-	-	-	-	+	-	+	-	-	+	+	-	-	+	-	-	-	-	+	-
-10	+	-	+	-	-	-	-	-	+	-	-	-	-	-	-	+	-	-	-	-	+	-	-	-	-	-	-	-	+	-	-	-	-	+	-	+	-	-	+	+	-	-	+	-	-	-	-	+	-
0	+	-	+	-	-	-	-	-	+	-	-	-	-	-	-	+	-	+	-	-	+	-	-	-	-	-	-	-	+	-	+	-	+	+	-	+	-	-	+	+	-	-	+	-	-	-	-	+	-
10	+	-	+	-	-	-	-	-	+	-	-	-	-	-	-	+	-	+	-	-	+	-	-	-	+	-	-	-	+	-	+	-	+	+	-	+	-	-	+	+	-	-	+	-	-	-	-	+	-
20	+	-	+	-	-	-	-	-	+	-	-	-	-	-	-	+	-	+	-	-	+	-	-	-	+	-	-	-	+	-	+	-	+	+	-	+	-	-	+	+	-	-	+	-	-	-	-	+	-
30	+	-	+	-	-	-	-	-	+	+	-	-	-	-	-	-	-	+	-	-	+	-	-	-	+	-	-	-	+	+	+	-	+	+	-	+	-	-	+	+	-	-	+	-	-	-	-	+	-
40	+	-	+	-	-	-	-	-	+	+	-	-	-	-	-	-	-	+	-	-	+	-	-	-	+	-	-	-	+	+	+	-	+	+	-	+	-	-	+	+	-	-	+	-	-	-	-	+	-
50	+	-	+	-	-	-	-	-	+	+	+	-	-	-	-	-	-	+	-	-	+	-	-	-	+	-	-	-	+	+	+	-	+	+	-	+	-	-	+	+	-	-	+	-	-	-	-	+	-
60	+	-	+	-	-	-	-	-	+	+	+	-	-	-	-	-	-	+	-	-	+	-	-	-	+	-	-	-	+	+	+	-	+	+	-	+	-	-	+	+	-	-	+	-	-	-	-	+	-
70	+	-	+	-	-	-	-	-	+	+	+	-	-	-	-	-	-	+	-	-	+	-	-	-	+	-	-	-	+	+	+	-	+	+	-	+	-	-	+	+	-	-	+	-	-	-	-	+	-
80	+	-	+	-	-	-	-	-	+	+	+	-	-	-	-	-	-	+	-	-	+	-	-	+	+	-	-	-	+	+	+	-	+	+	-	+	-	-	+	+	-	-	+	-	-	-	-	+	-
90	+	-	+	-	-	-	-	-	+	+	+	-	-	-	-	-	-	+	-	-	+	-	-	+	+	-	-	-	+	+	+	-	+	+	-	+	-	-	+	+	-	-	+	-	-	-	-	+	-
100	+	-	+	-	-	-	-	-	-	+	+	-	-	-	-	-	-	+	-	-	+	-	-	+	+	-	-	-	+	+	+	-	+	+	-	+	-	-	+	+	-	-	+	-	-	-	-	+	-
110	+	-	-	-	-	-	-	-	-	+	+	-	-	-	-	-	-	+	-	-	+	-	-	+	+	-	-	-	+	+	+	-	+	+	-	+	-	-	+	+	-	-	+	-	-	-	-	+	-
120	+	-	-	-	-	-	-	-	-	+	+	-	-	-	-	-	-	+	-	-	+	-	-	+	+	-	-	-	+	+	+	-	+	+	-	+	-	-	+	+	-	-	+	-	-	-	-	+	-
130	+	-	-	-	-	-	-	-	-	+	-	-	-	-	-	-	-	+	-	-	+	-	-	+	+	-	-	-	+	+	+	-	+	+	-	+	-	-	+	+	-	-	+	-	-	-	-	+	-
140	+	-	-	-	-	-	-	-	-	+	-	-	-	-	-	-	-	+	-	-	+	-	-	+	+	-	-	-	+	+	+	-	+	+	-	+	-	-	+	+	-	-	+	-	-	-	-	-	-
150	+	-	-	-	-	-	+	-	-	+	-	+	-	-	-	-	-	+	-	-	+	-	-	+	+	-	-	-	+	+	+	-	+	-	-	+	-	-	+	+	-	-	+	-	-	-	-	-	-
160	+	-	-	-	-	-	+	-	-	+	-	+	-	-	-	-	-	+	-	-	+	-	-	-	+	-	-	-	+	+	+	-	+	-	-	+	-	-	+	+	-	-	+	-	-	-	-	-	-
170	+	-	-	-	-	-	+	-	-	+	-	+	-	-	-	-	-	+	-	-	+	-	-	-	+	-	-	-	+	+	+	-	+	-	-	+	-	-	+	-	-	-	+	-	-	-	-	-	-
180	+	-	-	-	-	-	+	-	-	+	-	+	-	-	-	-	-	-	-	-	+	-	-	-	+	-	-	-	+	+	+	-	+	-	-	+	-	-	+	-	-	-	+	-	-	-	-	-	+
190	+	-	-	-	-	-	+	-	-	+	-	+	-	-	-	-	-	-	-	-	+	-	-	-	+	-	-	-	+	+	+	-	+	-	-	+	-	-	+	-	-	-	+	-	-	-	-	-	+
200	+	-	-	-	-	-	+	-	-	+	-	+	-	-	-	-	-	-	-	-	+	-	-	-	+	-	-	-	+	+	+	-	+	-	-	+	-	-	+	-	-	-	+	-	-	-	-	-	+
210	+	-	-	-	-	-	+	-	-	+	-	+	-	-	-	-	-	-	-	-	-	-	-	-	+	-	-	-	+	+	+	-	+	-	-	+	-	-	+	-	-	-	+	-	-	-	-	-	+
220	+	-	-	-	-	-	+	-	-	+	-	+	-	-	-	-	-	-	-	-	-	-	-	-	+	-	-	-	+	+	+	-	+	-	-	+	-	-	+	-	-	-	+	-	-	-	-	-	+
230	+	-	-	-	-	-	+	-	-	+	-	+	-	-	-	-	-	-	-	-	-	-	-	-	+	-	-	-	+	+	+	-	+	-	-	+	-	-	+	-	-	-	+	-	-	-	-	-	+
240	+	-	-	-	-	-	+	-	-	+	-	+	-	-	-	-	-	-	-	-	-	+	-	-	+	-	-	-	+	+	+	-	+	-	-	+	-	-	+	-	-	-	+	-	-	-	-	-	+
250	+	-	-	-	-	-	+	-	-	+	-	+	-	-	-	-	-	-	-	-	-	+	-	-	+	-	-	-	+	+	+	-	+	-	-	-	-	-	+	-	-	-	+	-	-	-	-	-	+
260	+	-	-	-	-	-	+	-	-	+	-	+	-	-	-	-	-	-	-	-	-	+	-	-	+	-	-	-	+	+	+	-	+	-	-	-	-	-	+	-	-	-	+	-	-	-	-	-	+
270	+	-	-	-	-	-	+	-	-	+	-	+	-	-	-	-	-	-	-	+	-	+	-	-	+	-	-	-	+	-	+	-	+	-	-	-	-	-	+	-	-	-	+	-	-	-	-	-	+
280	+	-	-	-	-	-	+	-	-	+	-	+	-	-	-	-	-	-	-	+	-	+	-	-	+	-	-	-	+	-	+	-	+	-	-	-	-	-	+	-	-	-	+	-	-	-	-	-	+
290	+	-	-	-	-	-	+	-	-	-	-	+	-	-	-	+	-	-	-	+	-	+	-	-	+	-	-	-	+	-	+	-	+	-	-	-	-	-	+	-	-	-	+	-	-	-	-	-	+
300	+	-	-	-	-	-	+	-	-	-	-	+	-	-	-	+	-	-	-	+	-	+	-	-	+	-	-	-	+	-	+	-	+	-	-	-	-	-	-	-	-	-	+	-	-	-	-	-	+
310	+	-	-	-	-	-	+	-	-	-	-	+	-	-	-	+	-	-	-	+	-	+	-	-	+	-	-	-	+	-	+	-	+	-	-	-	-	-	-	-	-	-	+	-	-	-	-	-	+
320	+	-	-	-	-	-	+	-	-	-	-	+	-	-	-	+	-	-	-	+	-	+	-	-	+	-	-	-	+	-	+	-	+	-	-	-	-	-	-	-	-	-	+	-	-	-	-	-	+
330	+	-	-	-	-	-	+	-	-	-	-	+	-	-	-	+	-	-	-	+	-	+	+	-	+	-	-	-	+	-	+	-	+	-	-	-	-	-	-	-	+	-	+	-	-	-	-	-	+
340	+	-	-	-	-	-	+	-	-	-	-	+	-	-	-	+	-	-	-	+	-	+	+	-	+	-	-	-	+	-	+	-	+	-	-	-	-	-	-	-	+	-	+	-	-	-	-	-	+
350	+	-	-	-	-	-	+	-	-	-	-	-	-	-	-	+	-	-	-	+	-	+	+	-	+	-	-	-	+	-	+	-	+	-	-	-	-	-	-	-	+	-	+	-	-	-	-	-	-
360	+	-	-	-	-	-	+	-	-	-	-	-	-	-	-	+	-	-	-	+	-	+	+	-	+	-	-	-	+	-	+	-	+	-	-	-	-	-	-	-	+	-	+	-	-	-	-	+	-
370	+	-	-	-	-	-	+	-	-	-	-	-	-	-	-	+	-	-	-	+	-	+	+	-	+	-	-	-	+	-	+	-	+	-	-	-	-	-	-	-	+	-	+	-	-	-	-	+	-
380	+	-	-	-	-	-	+	-	-	-	-	-	-	-	-	+	-	-	-	+	-	+	+	-	+	-	-	-	+	-	+	-	+	-	-	-	-	-	-	-	+	-	+	-	-	-	+	+	-
390	+	-	-	-	-	-	-	-	-	-	-	-	-	-	-	+	-	-	-	+	-	+	+	-	+	-	-	-	+	-	+	-	+	-	-	-	-	-	-	-	+	-	+	-	-	-	+	+	-
400	+	-	-	-	-	-	-	-	-	-	-	-	-	-	-	+	-	-	-	+	-	+	+	-	-	-	-	-	+	-	+	-	+	-	-	-	-	-	-	-	+	-	+	-	-	-	+	+	-
410	+	-	-	-	+	-	-	-	-	-	-	-	-	-	-	+	-	-	-	+	-	+	+	-	-	-	-	-	+	-	+	-	+	-	-	-	-	-	-	-	-	-	+	-	-	-	+	+	-
420	+	-	-	-	+	-	-	-	-	-	-	-	-	-	-	+	-	-	-	+	-	+	+	-	-	-	-	-	+	-	+	-	+	-	-	-	-	-	-	-	-	-	+	-	-	-	+	+	-
430	+	-	-	-	+	-	-	-	-	-	-	-	-	-	-	+	-	-	-	+	-	+	+	+	-	-	-	-	+	-	+	-	+	-	-	-	-	-	-	-	-	-	+	-	-	-	+	+	-
440	+	-	-	-	+	-	-	-	-	-	-	-	-	-	-	+	-	-	-	+	-	+	+	+	-	-	-	-	+	-	+	-	+	-	-	-	-	-	-	-	-	-	+	-	-	-	+	+	-
450	+	-	-	-	+	-	-	-	-	-	-	-	-	-	-	+	-	-	-	+	-	+	+	+	-	-	-	-	+	-	+	-	+	-	-	-	-	-	-	-	-	-	+	-	-	-	+	+	-
460	+	-	-	-	+	-	-	-	-	-	-	-	-	-	-	+	-	-	-	+	-	+	+	+	-	-	-	-	+	-	+	-	+	-	-	-	-	-	-	-	-	-	+	-	-	-	+	+	-
470	+	-	-	-	+	-	-	-	-	-	-	-	-	-	-	+	-	+	-	+	-	+	+	+	-	-	-	-	+	-	+	-	+	-	-	-	-	-	-	-	-	-	+	-	-	-	+	+	-
480	+	-	-	-	+	+	-	-	-	-	-	-	-	-	-	+	-	+	-	+	-	+	+	+	-	-	-	-	+	-	+	-	+	-	-	-	-	-	-	-	-	-	+	-	-	-	+	+	-
490	+	-	-	-	+	+	-	-	-	-	-	-	-	-	-	+	-	+	-	+	-	+	+	+	-	-	-	-	-	-	+	-	+	-	-	-	-	-	-	-	-	-	+	-	-	-	+	+	-
500	+	-	-	-	+	+	-	-	-	-	-	-	-	-	-	+	-	+	-	+	-	+	+	+	-	-	-	-	-	-	+	-	+	-	-	-	-	-	+	-	-	-	+	-	-	-	+	+	-
510	+	-	-	-	+	+	-	-	-	-	-	-	-	-	-	+	-	+	-	+	-	+	+	+	-	-	-	-	-	-	+	-	+	-	-	-	-	-	+	-	-	-	+	-	-	-	+	+	-
520	+	-	-	-	+	+	-	-	-	-	-	-	-	-	-	+	-	+	-	+	-	+	+	+	-	-	-	-	-	-	+	-	+	-	-	-	-	-	+	-	-	-	+	-	-	-	+	+	-
530	+	-	-	-	+	+	-	-	-	-	-	-	-	-	-	+	-	+	+	+	-	+	+	+	-	-	-	-	-	-	+	-	+	-	-	-	-	-	+	-	-	-	+	-	-	-	+	+	-
540	+	-	-	-	+	+	-	-	-	-	-	-	-	-	-	+	-	-	+	+	-	+	+	+	+	-	-	-	-	-	+	-	+	-	-	-	-	-	+	-	-	-	+	-	-	-	+	+	-
550	+	-	+	+	+	+	-	-	-	-	-	-	+	-	-	+	-	-	+	+	-	+	+	+	+	-	-	-	-	-	+	-	+	-	-	-	-	-	+	-	-	-	+	-	-	-	+	+	-
560	+	-	+	+	+	+	-	-	-	-	-	-	+	-	-	+	-	+	+	+	-	+	+	+	+	-	-	-	-	-	+	-	+	-	-	-	-	-	+	-	-	-	+	-	-	-	+	+	-
570	+	-	+	+	+	+	-	-	-	-	-	-	+	-	-	+	-	+	+	+	-	+	+	+	+	-	-	-	-	-	+	-	+	-	-	-	-	-	+	-	-	-	+	-	-	-	+	+	-
580	+	-	+	+	+	+	-	-	-	-	-	-	+	-	-	+	-	+	+	+	-	+	+	+	+	-	-	-	-	-	+	-	+	-	-	-	-	-	+	-	-	-	+	-	-	+	+	+	-
590	+	-	+	+	+	+	-	-	-	-	-	-	+	-	-	+	-	+	+	+	-	+	+	+	+	-	-	-	-	-	+	-	+	-	-	-	-	-	+	-	-	-	+	-	-	+	+	+	-
600	+	-	+	+	-	+	-	-	-	-	-	-	+	-	-	+	-	+	+	+	-	+	+	+	+	-	-	-	-	-	+	-	+	-	-	-	-	-	+	-	-	-	+	-	-	+	+	+	-
610	-	-	+	+	-	+	-	-	-	-	-	-	+	-	+	+	-	+	+	+	-	+	+	+	+	-	-	-	-	-	+	-	+	-	-	-	-	-	+	-	-	-	+	-	-	+	+	+	-
620	-	-	+	+	-	+	-	-	-	-	-	-	+	-	+	+	-	+	+	+	-	+	+	+	+	-	-	-	-	-	+	-	+	-	-	-	-	-	+	-	-	-	+	-	-	+	-	+	-
630	-	-	+	+	-	+	-	-	-	-	-	-	+	-	+	+	-	+	+	+	-	+	+	+	+	-	-	-	-	-	+	-	+	-	-	-	-	-	+	-	-	-	+	-	-	+	-	+	-
640	-	-	+	+	-	+	-	-	-	-	-	-	+	-	+	+	-	+	+	+	-	+	+	+	+	-	-	-	-	-	+	-	+	-	-	-	-	-	+	-	-	-	+	-	-	+	-	+	-
650	-	-	+	+	-	+	-	-	-	-	-	-	+	-	+	+	-	+	+	+	-	+	+	+	+	-	-	-	-	-	+	-	+	-	-	-	-	-	+	-	-	-	+	-	-	+	-	+	+
660	-	-	+	+	-	+	-	-	-	-	-	-	+	-	+	+	-	+	+	+	-	+	+	+	+	-	-	-	-	-	+	-	+	-	-	-	-	-	+	-	-	+	+	-	-	+	-	+	+
670	-	-	+	+	-	+	-	-	-	-	-	-	+	-	+	+	-	+	+	+	-	+	+	+	+	-	-	-	-	-	+	-	+	-	-	-	-	-	+	-	-	+	+	-	-	+	-	+	+
680	-	-	+	+	-	+	-	-	-	-	-	-	+	-	+	+	-	+	+	+	-	-	+	+	+	-	-	-	-	-	+	-	+	-	-	-	-	-	+	-	-	+	+	-	-	+	-	+	+
690	-	-	-	+	-	-	-	-	-	-	-	-	+	-	+	+	-	+	+	+	-	-	+	+	+	-	-	-	-	-	+	-	+	-	-	-	-	-	+	-	-	+	+	-	-	+	-	+	+
700	-	-	-	+	-	-	-	-	-	-	-	-	+	-	+	+	-	+	+	+	-	-	+	+	+	-	-	-	-	-	+	-	+	-	-	-	-	-	+	-	-	+	+	-	-	+	-	+	+
710	-	-	-	+	-	-	-	-	-	-	-	-	-	-	+	+	-	+	+	+	-	-	+	+	+	-	+	-	-	-	+	-	+	-	-	-	-	-	+	-	-	+	+	-	-	+	-	+	+
720	-	-	-	+	-	-	-	-	-	-	-	-	-	-	+	+	-	+	+	+	-	-	+	+	+	-	+	-	-	-	+	-	+	-	-	-	-	-	+	-	-	+	+	-	-	+	-	+	+
730	-	-	-	+	-	-	-	-	-	-	-	-	-	-	+	+	-	+	+	+	-	-	+	+	+	-	+	-	-	-	+	-	+	-	-	-	-	-	+	-	-	+	+	-	-	+	-	+	+
740	-	-	-	+	-	-	-	-	-	-	-	-	-	-	+	+	-	+	+	+	-	-	+	+	+	-	+	-	-	-	+	-	+	-	-	-	-	-	+	-	-	+	+	-	-	+	-	+	+
750	-	-	-	+	-	-	-	-	-	-	-	-	-	-	+	+	-	+	+	+	-	-	+	+	+	-	+	-	-	-	+	-	+	-	-	-	-	-	+	-	-	+	+	-	-	+	-	+	+
760	-	-	-	+	-	-	-	-	-	-	-	-	-	-	+	+	-	+	-	+	-	-	+	+	+	-	+	-	-	-	+	-	+	-	-	-	-	-	+	-	-	+	+	-	-	+	-	+	+
770	-	-	-	+	-	-	-	-	-	-	-	-	-	-	+	+	-	+	-	+	-	-	+	+	+	-	+	-	-	-	+	-	+	-	-	-	-	-	+	-	-	+	+	-	-	+	-	+	+
780	-	-	-	+	-	-	-	-	-	-	-	-	-	-	+	+	-	+	-	+	-	-	+	+	+	+	+	-	-	-	+	-	+	-	-	-	-	-	+	-	-	+	+	-	-	+	-	+	+
790	-	-	-	+	-	-	-	-	-	-	-	-	-	-	+	+	-	+	-	+	-	-	+	+	+	+	+	-	-	-	+	-	+	-	-	-	-	-	+	-	-	+	+	-	-	+	+	+	+
800	-	-	-	+	-	-	-	-	-	-	-	-	-	-	+	+	-	+	-	+	-	-	+	+	+	+	+	-	-	-	+	-	+	-	-	-	-	-	+	-	-	+	+	-	-	+	+	-	+
810	-	-	-	+	-	-	-	-	-	-	-	-	-	-	+	+	-	+	-	+	-	-	+	+	+	+	+	-	-	-	+	-	+	-	-	-	-	-	+	-	-	+	+	-	-	+	+	-	+
820	-	-	-	+	-	-	-	-	-	-	-	-	-	-	+	+	-	+	-	+	-	-	+	+	+	+	-	-	-	-	+	-	+	-	-	-	-	-	+	-	-	+	+	-	+	+	+	-	+
830	-	-	-	+	-	-	-	-	-	-	-	-	-	-	+	+	-	+	-	+	-	-	+	+	+	+	-	-	-	-	+	-	+	-	-	-	-	-	+	-	-	+	+	-	+	+	+	-	-
840	-	-	-	+	-	-	-	-	-	-	-	-	-	-	+	+	-	+	-	+	-	-	+	+	+	+	-	-	-	-	+	-	+	-	-	-	-	-	+	-	-	+	+	-	+	+	+	-	-
850	-	-	-	+	-	-	-	-	-	-	-	-	-	-	+	+	-	+	-	+	-	-	+	+	+	+	-	-	-	-	+	-	+	-	-	-	-	-	+	-	-	+	+	-	+	-	+	-	-
860	-	-	-	+	-	-	-	-	-	-	-	-	-	-	+	+	-	+	-	+	-	-	+	+	+	+	-	-	-	-	+	-	+	-	-	-	-	-	+	-	-	+	+	-	+	-	+	-	-
870	-	-	-	+	-	-	-	-	-	-	-	-	-	-	+	+	-	+	-	+	-	-	+	+	+	+	-	-	-	-	+	-	+	-	-	-	-	-	+	-	-	+	+	-	+	-	+	-	-
880	-	-	-	+	-	-	-	-	-	-	-	-	-	-	+	+	-	+	-	+	-	-	+	+	+	+	-	-	-	-	+	-	+	-	+	-	-	-	+	-	-	+	+	-	+	-	+	-	-
890	-	-	-	+	-	-	-	-	-	-	-	-	-	+	+	+	-	+	-	+	-	-	+	+	+	+	-	-	-	-	+	-	+	-	+	-	-	-	+	-	-	+	+	-	+	-	+	-	-
900	-	-	-	+	-	-	-	-	-	-	-	-	-	+	+	+	-	+	-	+	-	-	+	+	+	+	-	-	-	-	+	-	+	-	+	-	-	-	+	-	-	+	+	-	+	-	+	-	-
910	-	-	-	+	+	-	-	-	-	-	-	-	-	+	+	+	-	+	-	+	-	-	+	+	+	+	-	-	-	-	+	-	+	-	+	-	-	-	+	-	-	+	+	-	+	-	+	-	-
920	-	-	+	+	+	-	-	-	-	-	-	-	-	+	+	+	-	+	-	+	-	-	+	+	+	+	-	-	-	-	+	-	+	-	+	-	-	-	+	-	-	+	+	-	+	-	+	-	-
930	-	-	+	+	+	-	-	-	-	-	-	-	-	+	+	+	-	+	-	+	-	-	+	+	+	+	-	-	-	-	+	-	+	-	+	-	-	-	+	-	-	+	+	-	+	-	+	-	+
940	-	-	+	+	+	-	-	-	-	-	-	-	-	+	+	+	-	+	-	+	-	-	+	+	+	+	-	-	-	-	+	+	+	-	+	-	-	-	+	-	-	+	+	-	+	-	-	-	+
950	-	-	+	+	+	-	-	-	-	-	-	-	-	+	+	+	-	+	-	+	-	-	+	+	-	+	-	-	-	-	+	+	+	-	+	-	-	-	+	-	-	+	+	-	+	-	-	-	+
960	-	-	+	+	+	-	-	-	-	-	-	-	-	+	+	+	-	+	-	+	-	-	+	+	-	+	-	-	-	-	+	+	+	-	+	-	-	-	+	-	-	+	+	-	+	-	-	-	+
970	-	-	+	+	+	-	-	-	-	-	-	-	-	+	+	+	-	+	-	+	-	-	+	+	-	+	-	-	-	-	+	+	+	-	+	-	-	-	+	-	-	+	+	-	+	-	-	-	+
980	-	-	+	+	+	-	-	-	-	-	-	-	-	+	+	+	-	+	-	+	-	-	+	+	+	+	-	+	-	-	+	+	+	-	+	-	-	-	+	-	-	+	+	-	+	-	-	-	+
990	-	-	+	+	+	-	-	-	-	-	-	-	-	+	+	+	-	-	-	+	-	-	+	+	+	+	-	+	-	-	+	+	+	-	+	-	-	-	+	-	-	+	+	-	+	-	-	-	+
1000	-	-	+	+	+	-	-	-	-	-	-	-	-	+	+	+	-	-	-	+	-	-	+	+	+	+	-	+	-	-	+	+	+	-	+	-	-	-	+	-	-	+	+	-	+	-	-	-	+
1010	-	-	+	+	+	-	-	-	-	-	-	-	-	+	-	+	-	-	-	+	-	-	+	+	+	+	-	+	-	-	+	+	+	-	+	-	-	-	+	-	-	+	+	-	+	-	-	-	+
1020	-	+	+	+	+	-	-	-	-	-	-	-	-	+	-	+	-	-	-	+	-	-	+	+	+	+	-	+	-	-	+	+	+	-	+	-	-	-	+	-	-	+	+	-	+	-	-	-	+
1030	-	+	+	+	+	-	-	-	-	+	-	-	-	+	-	+	-	-	-	+	-	-	+	+	+	+	-	+	-	-	+	+	+	-	+	-	-	-	+	-	-	+	+	-	+	-	-	-	+
1040	-	+	+	+	+	-	-	-	-	+	-	-	-	+	-	+	-	-	-	+	-	-	+	-	+	+	-	+	-	-	+	+	+	-	+	-	-	-	+	-	-	+	+	-	+	-	-	-	+
1050	-	+	+	+	+	-	-	-	-	+	-	-	-	+	-	-	-	-	-	+	-	-	+	-	+	+	-	+	-	-	+	+	+	-	+	-	-	-	+	-	-	+	+	-	+	-	-	-	+
1060	-	+	+	+	+	-	-	-	-	+	-	-	-	+	-	-	-	-	-	+	-	-	+	-	+	+	-	+	-	-	+	+	+	-	+	-	+	-	+	-	-	+	+	-	+	-	-	-	+
1070	-	+	+	+	+	-	-	-	-	+	-	-	-	+	-	-	-	-	-	+	-	-	+	-	+	+	-	+	-	-	+	+	+	-	+	-	+	-	+	-	-	+	+	-	+	-	-	-	+
1080	-	+	+	+	+	-	-	-	-	+	-	-	-	+	-	-	-	-	-	+	-	-	+	-	+	+	-	+	-	-	+	+	+	-	+	-	+	-	-	-	-	+	+	-	+	-	-	-	+
1090	-	+	+	+	+	-	-	-	-	+	-	-	-	+	-	-	-	-	-	+	-	-	+	-	+	+	-	+	-	-	+	+	+	-	+	-	+	-	-	-	-	+	+	-	+	-	-	-	+
1100	-	+	+	+	+	-	-	-	-	+	-	-	-	+	-	-	-	-	-	+	-	-	+	-	+	+	-	+	-	-	+	+	+	+	+	-	+	-	-	-	-	+	+	-	+	-	-	-	+
1110	-	+	+	+	+	-	-	-	-	+	-	-	-	+	-	-	-	-	-	+	-	-	+	-	+	+	-	+	-	-	+	+	+	+	+	-	+	-	-	-	-	+	+	-	+	-	-	-	+
1120	-	+	+	+	+	-	-	-	-	+	-	-	-	+	-	-	-	-	-	+	-	-	+	-	+	+	-	+	-	-	+	+	+	+	+	-	+	-	-	-	-	+	+	-	+	-	-	-	+
1130	-	+	+	+	+	-	-	-	-	+	-	-	-	+	-	-	-	-	-	+	-	-	+	-	+	+	-	+	-	-	+	+	+	+	+	-	+	-	-	-	-	+	+	-	+	-	-	-	+
1140	-	+	+	+	+	-	-	-	-	+	-	-	-	+	-	-	-	-	-	+	-	-	+	-	+	+	-	+	-	-	+	+	+	+	+	-	+	-	-	-	-	+	+	-	+	-	-	-	+
1150	-	+	+	+	+	-	-	-	-	+	-	-	-	+	-	-	-	-	+	+	-	-	+	-	+	+	-	+	-	-	+	+	+	+	+	-	+	-	-	-	-	+	+	-	+	-	-	-	+
1160	-	+	+	+	+	-	-	-	-	+	-	+	-	+	-	-	-	-	+	+	-	-	+	-	+	+	-	+	-	-	+	+	+	+	+	-	+	-	-	-	-	+	+	-	+	-	-	-	+
1170	-	+	+	+	+	-	-	-	-	+	-	+	-	+	-	-	-	-	+	+	-	-	+	-	+	+	-	+	-	-	+	+	+	+	+	-	+	-	-	-	-	+	+	-	+	-	-	-	+
1180	-	+	+	+	+	-	-	-	-	+	-	+	-	+	-	-	-	-	+	+	-	-	+	-	+	+	-	+	-	-	+	+	+	+	+	-	+	-	-	-	-	+	+	-	+	-	-	-	+
1190	-	+	+	+	+	-	-	-	-	+	-	+	-	+	-	-	-	-	+	+	-	+	+	-	-	+	-	+	-	-	+	+	+	+	+	-	+	-	-	-	-	+	+	-	+	-	-	-	+
1200	-	+	+	+	+	-	-	-	-	+	-	+	-	+	-	-	-	-	+	+	-	+	+	-	-	+	+	+	-	-	+	+	+	+	+	-	+	-	-	-	-	+	+	-	+	-	-	-	+
1210	-	+	+	+	+	-	+	-	-	+	-	+	-	+	-	-	-	-	+	+	-	+	+	-	-	+	+	+	-	-	+	+	+	+	+	-	+	-	-	-	-	+	+	-	+	-	-	-	+
1220	-	+	+	+	+	-	+	-	-	+	-	+	-	+	-	-	-	-	+	+	-	+	+	-	-	+	+	+	-	-	+	-	+	+	+	-	+	-	-	-	-	+	+	-	+	-	-	-	-
1230	-	+	+	+	+	-	+	-	-	+	-	+	-	+	-	-	-	-	+	+	-	+	+	-	-	+	+	-	-	-	+	-	+	+	+	-	+	-	-	+	-	+	+	-	+	-	-	-	-
1240	-	+	+	+	+	-	+	-	-	+	-	+	-	+	-	-	-	-	+	+	-	+	+	-	-	+	+	-	-	-	+	-	+	+	+	-	+	-	-	+	-	+	+	-	+	-	-	-	-
1250	-	+	+	+	+	-	+	-	-	+	-	+	-	+	-	-	-	-	+	+	-	+	+	-	-	+	+	-	-	-	+	-	+	+	+	-	+	-	-	+	-	+	+	-	+	-	-	-	-
1260	-	+	+	+	+	-	+	-	-	+	-	+	-	+	-	-	-	-	+	+	-	+	+	-	-	+	+	-	-	+	+	-	+	+	+	-	+	-	-	+	+	+	+	-	+	-	-	-	-
1270	-	+	+	+	+	-	+	-	-	+	-	+	-	+	-	-	-	-	+	+	-	+	+	-	-	+	+	-	-	+	+	+	+	+	+	-	+	-	-	+	+	+	+	-	+	-	-	-	-
1280	-	+	+	+	+	-	+	-	-	+	-	+	-	+	-	-	-	-	+	+	-	+	+	+	-	+	+	-	-	+	+	+	+	+	+	-	+	-	-	+	+	+	+	-	+	-	-	-	-
1290	-	+	+	+	+	-	+	-	-	+	-	-	-	+	-	-	-	-	+	+	-	+	+	+	-	+	+	-	-	+	+	+	+	+	+	-	+	-	-	+	+	+	+	-	+	-	-	-	-
1300	-	+	+	+	+	-	+	-	-	+	-	-	-	+	-	-	-	-	+	+	-	+	+	+	-	+	+	-	-	+	+	+	-	+	+	-	+	-	-	+	+	+	+	-	+	-	-	-	-
1310	-	+	+	+	+	-	+	-	-	+	-	-	-	+	-	-	-	-	+	+	-	+	+	+	-	+	+	-	-	+	+	+	-	+	+	-	+	-	-	+	+	+	+	-	+	-	-	-	-
1320	-	+	+	+	+	-	+	-	-	+	-	-	-	+	-	-	-	-	+	+	-	+	+	+	-	+	-	-	-	+	+	+	+	+	+	-	-	-	-	+	+	+	+	-	+	-	-	-	-
1330	-	+	+	+	+	-	+	-	-	+	-	-	-	+	-	-	-	-	+	+	-	+	+	+	-	+	-	-	-	+	+	+	+	+	+	-	+	-	-	+	+	+	+	-	+	-	-	-	-
1340	-	+	+	+	+	-	+	-	-	+	-	+	-	+	-	-	-	-	+	+	-	+	+	+	-	+	-	-	-	+	+	+	+	+	+	-	+	-	-	+	+	+	+	-	+	-	-	-	-
1350	-	+	+	+	+	-	+	-	-	+	-	+	-	+	-	-	-	-	+	+	-	+	+	+	-	+	-	-	-	+	+	+	+	+	+	-	+	-	-	-	+	+	+	-	+	-	+	-	-
1360	-	+	+	+	+	-	+	-	-	+	-	+	-	+	-	-	-	-	+	+	-	+	+	+	-	+	-	-	-	+	+	+	+	+	+	-	+	-	-	-	+	+	+	-	+	-	+	-	-
1370	-	+	+	+	+	-	+	-	-	+	-	+	-	+	-	-	-	-	+	+	-	+	+	+	-	+	-	-	-	-	+	+	+	+	+	-	+	-	-	-	+	+	+	-	+	-	+	-	-
1380	-	+	+	+	+	-	+	-	-	+	-	+	-	+	-	-	-	-	+	+	-	+	+	+	-	+	-	+	-	-	+	+	+	+	+	-	+	-	-	-	+	+	+	-	+	-	+	-	-
1390	-	+	+	+	+	-	+	-	-	+	-	+	-	+	-	-	-	-	+	+	-	-	+	+	-	+	-	+	-	-	+	+	+	+	+	-	+	-	-	-	+	+	+	-	+	-	+	-	-
1400	-	+	+	+	+	-	+	-	-	+	-	+	-	+	-	-	-	-	+	+	-	-	+	+	-	+	-	+	-	-	+	+	+	+	+	-	+	-	-	-	+	+	+	-	+	-	+	-	-
1410	-	+	+	+	+	-	+	-	-	+	-	+	-	+	-	-	-	-	+	+	-	-	+	+	-	+	-	+	-	-	+	+	+	+	+	-	+	-	-	-	+	+	+	-	+	-	+	-	-
1420	-	+	+	+	+	-	+	-	-	+	-	+	-	+	-	-	-	-	+	+	-	-	+	+	-	+	-	+	-	-	+	+	+	+	+	-	+	-	-	-	+	+	+	-	+	-	+	-	-
1430	-	+	+	+	+	-	-	-	-	+	-	+	-	+	-	-	-	-	+	+	-	-	+	+	-	+	-	+	-	-	+	+	+	+	+	-	+	-	-	-	+	+	+	-	+	-	+	-	-
1440	-	+	+	+	+	-	-	-	-	+	-	+	-	+	-	-	-	-	+	+	-	-	+	+	-	+	-	+	-	-	+	+	+	-	+	-	+	-	-	-	+	+	+	-	+	-	+	-	-
1450	-	+	+	+	+	-	-	-	-	+	-	+	-	+	-	-	-	-	+	+	-	-	+	+	-	+	-	+	-	-	+	+	+	-	+	-	+	-	-	-	+	+	+	-	+	-	+	-	-
1460	-	+	+	+	+	-	-	-	-	+	-	+	-	+	-	-	-	-	+	+	-	-	+	+	-	+	-	+	-	-	+	+	+	-	+	-	+	-	-	-	+	+	+	-	+	-	+	-	-
1470	-	+	+	+	+	-	-	-	-	+	-	+	-	+	-	-	-	-	+	+	-	-	+	+	-	+	-	+	-	-	+	+	+	-	+	-	+	-	-	-	+	+	+	-	+	-	+	-	-
1480	-	+	-	+	+	-	-	-	-	+	-	+	-	+	-	-	-	-	+	+	-	-	+	+	-	+	-	+	-	-	+	+	+	-	+	-	+	-	-	-	+	+	+	-	+	-	+	-	-
1490	-	+	-	+	+	-	-	-	-	+	-	+	-	+	-	-	-	-	+	+	-	-	+	-	-	+	-	+	-	-	+	-	+	-	+	-	+	-	-	-	+	+	+	-	+	-	+	-	-
1500	+	+	-	+	+	-	-	-	-	+	-	+	-	+	-	-	-	-	+	+	-	-	+	-	-	+	-	+	-	-	+	-	+	-	+	-	-	-	-	-	+	+	+	-	+	-	+	-	-
1510	+	+	-	+	+	+	-	-	-	+	-	+	-	+	-	-	-	-	+	+	-	-	+	-	-	+	-	+	-	-	+	-	+	-	+	+	-	-	-	-	+	+	+	-	+	-	+	-	-
1520	+	-	-	+	+	+	-	-	-	+	-	+	-	+	-	-	-	-	+	+	-	-	+	-	-	+	-	+	-	-	+	-	+	-	+	+	-	-	-	-	+	+	+	-	+	-	+	-	-
1530	+	-	-	+	+	+	-	-	-	+	-	+	-	+	-	-	-	-	+	+	-	-	+	-	-	+	-	+	-	-	+	-	+	-	+	+	-	-	+	-	+	+	+	-	+	-	+	-	-
1540	+	-	-	+	+	+	-	-	-	+	-	+	-	+	-	-	-	-	+	+	-	-	+	-	-	+	-	+	-	-	+	-	+	-	+	+	-	-	+	+	+	+	+	-	+	-	+	-	-
1550	+	-	-	+	+	+	-	-	-	+	-	+	-	+	-	-	-	-	+	+	-	-	+	-	-	+	-	+	-	-	+	-	+	-	+	+	-	-	+	+	+	+	+	-	+	-	+	-	-
1560	+	-	-	+	+	+	-	-	-	+	-	-	-	+	-	+	-	-	+	+	-	-	+	+	-	+	-	+	-	-	+	-	+	-	+	+	-	-	+	+	+	+	+	-	+	-	+	-	-
1570	+	-	-	+	+	+	-	-	-	+	-	-	+	+	-	+	-	-	+	+	-	-	+	+	-	+	-	+	-	-	+	-	+	-	+	+	-	-	+	+	+	+	+	-	+	-	+	-	-
1580	+	-	-	+	+	+	-	-	-	+	-	-	+	+	-	+	-	-	+	+	-	-	+	+	-	+	-	+	-	-	+	-	+	-	+	+	-	-	+	+	+	+	+	-	+	-	+	-	-
1590	+	-	-	+	+	+	-	-	-	+	-	-	+	+	-	+	-	-	+	+	-	-	+	+	-	+	-	+	-	-	+	-	-	-	+	+	-	-	+	+	+	+	+	-	+	-	+	-	-
1600	+	-	-	+	+	+	-	-	-	+	-	-	+	+	-	+	-	-	+	+	-	-	+	+	-	+	-	-	-	-	+	-	-	-	+	+	-	-	+	+	+	+	+	-	+	-	+	-	-
1610	+	-	-	+	+	+	-	-	-	+	-	-	+	+	-	+	-	-	+	+	-	-	+	+	-	+	-	-	-	-	+	-	-	-	+	+	-	-	+	+	+	+	+	-	+	-	+	-	-
1620	+	-	-	+	+	+	-	-	-	+	-	-	+	+	-	+	-	-	+	+	-	-	+	+	-	+	-	-	-	-	+	-	-	-	+	+	-	-	+	+	+	+	+	-	+	-	+	-	-
1630	+	-	+	+	+	+	-	-	-	+	-	-	+	+	-	+	-	+	+	+	-	-	+	+	-	+	-	-	-	-	+	-	-	-	+	+	-	-	+	+	+	+	+	-	+	-	+	-	-
1640	+	-	+	+	+	+	-	-	-	+	-	-	+	+	-	+	-	+	+	+	-	-	+	+	-	+	-	-	-	-	+	-	-	-	+	+	-	-	+	+	+	-	+	-	+	-	+	-	-
1650	+	-	+	+	+	+	-	-	-	+	-	-	+	+	-	+	-	+	+	+	-	-	+	+	-	+	-	-	-	-	+	-	-	-	+	+	-	-	+	+	+	-	+	-	+	-	+	-	-
1660	+	-	+	+	+	+	-	-	-	+	-	-	+	+	-	+	-	+	+	+	-	-	+	+	-	+	-	-	-	-	+	-	-	-	+	+	-	+	+	+	+	-	+	-	+	-	+	-	-
1670	+	-	+	+	+	+	-	-	-	+	-	-	+	+	-	+	-	+	+	+	-	-	+	+	-	+	-	-	-	-	+	-	-	-	+	+	-	+	+	+	+	-	+	-	+	-	+	-	-
1680	+	-	+	+	+	+	-	-	-	+	-	-	+	+	-	+	-	+	+	+	-	-	+	+	-	+	-	-	-	-	+	-	-	-	+	+	-	+	+	+	+	-	+	-	+	-	+	-	-
1690	+	-	+	+	+	+	-	-	-	+	-	-	+	+	-	+	-	+	+	+	-	-	+	+	-	+	-	-	-	-	+	-	-	-	+	+	-	+	+	+	+	-	+	-	+	-	+	-	-
1700	+	-	+	+	+	+	-	-	-	+	-	-	+	+	-	+	-	+	+	+	-	-	+	+	-	+	-	+	-	-	+	-	-	-	+	+	-	+	+	+	+	-	+	-	+	-	+	-	-
1710	+	-	+	+	+	+	-	-	-	+	+	-	+	+	-	+	-	+	+	+	-	-	+	+	-	+	-	+	-	-	+	-	-	-	+	+	-	+	+	+	+	-	+	-	+	-	+	-	-
1720	+	-	+	+	+	+	-	-	-	+	+	-	+	+	-	+	-	+	+	+	-	-	+	+	-	+	-	+	-	-	+	-	-	-	+	+	+	+	+	+	+	-	+	-	+	-	+	-	-
1730	+	-	+	+	+	+	-	-	-	+	+	-	+	+	-	+	-	+	+	+	-	-	+	+	-	+	-	+	-	-	+	-	-	-	+	+	+	+	+	+	+	-	+	-	+	-	+	-	-
1740	+	-	+	+	+	+	-	-	-	+	+	-	+	+	-	+	-	+	+	+	-	-	+	+	-	+	-	+	-	-	+	-	-	-	+	+	+	+	+	+	+	-	+	-	+	-	+	-	-
1750	+	-	+	+	+	-	-	-	-	+	+	-	+	+	-	+	-	+	+	+	-	-	+	+	-	+	-	+	-	-	+	-	-	-	+	+	+	+	+	-	+	-	+	-	+	-	+	-	-
1760	+	-	+	+	+	-	-	-	-	+	-	-	+	+	-	+	-	+	+	+	-	-	+	+	-	+	-	+	-	-	+	-	-	-	+	+	+	+	+	-	+	-	+	-	+	-	+	-	-
1770	+	-	+	+	+	-	-	-	-	+	-	-	+	+	-	+	-	+	+	+	-	-	+	+	-	+	-	+	-	-	+	-	-	-	+	+	+	+	+	-	+	-	+	-	+	-	+	-	-
1780	+	-	+	+	+	-	-	-	-	+	-	-	+	+	-	+	-	+	+	+	-	-	+	+	-	+	-	+	-	-	+	-	-	-	+	+	+	+	+	-	+	-	+	-	+	-	+	-	-
1790	+	-	-	+	+	-	-	-	-	+	-	-	+	+	-	+	-	+	+	+	-	-	+	+	-	+	-	+	-	-	+	-	-	-	+	+	+	+	+	-	+	-	+	-	+	-	+	-	-
1800	+	-	-	+	+	-	-	-	-	+	-	-	+	+	-	+	-	+	+	+	-	-	+	+	-	+	-	+	-	-	+	-	-	-	+	+	+	+	+	-	+	-	+	-	+	-	+	-	-
1810	+	-	-	+	+	-	-	-	-	+	-	-	-	+	-	+	-	+	+	+	-	-	+	+	-	+	-	+	-	-	+	-	-	-	+	+	+	+	+	-	+	-	+	-	+	-	+	-	-
1820	+	-	-	+	+	-	-	-	-	+	-	-	-	+	-	+	-	+	+	+	-	-	+	+	-	+	-	+	-	-	+	-	-	-	+	+	+	+	+	-	+	-	+	-	+	-	+	-	-
1830	+	-	-	+	+	-	-	-	-	+	-	-	-	+	-	+	-	+	+	+	-	-	+	+	-	+	-	+	-	-	+	-	-	-	+	+	+	-	+	-	+	-	+	-	+	-	+	-	-
1840	+	-	-	+	+	-	-	+	-	+	-	-	-	+	-	+	-	+	+	+	-	-	+	+	-	-	-	+	-	-	+	-	-	-	+	+	+	-	+	-	+	-	+	-	+	-	+	-	-
1850	+	-	-	+	+	-	-	+	-	+	-	-	-	+	-	+	-	+	+	+	-	-	+	+	-	-	+	+	-	-	+	-	-	-	+	+	+	-	+	-	+	-	+	-	+	-	+	-	-
1860	-	-	-	+	+	-	-	+	-	+	-	+	-	+	-	+	-	+	+	-	-	-	+	+	-	-	+	+	-	-	+	+	-	-	+	+	+	-	+	-	+	-	+	-	+	-	+	-	-
1870	-	-	-	+	+	-	-	+	-	+	+	+	-	+	-	+	-	+	+	-	-	-	+	+	-	-	+	+	-	-	+	+	-	-	+	+	+	-	+	-	+	-	+	-	+	-	+	-	-
1880	-	-	-	+	+	-	-	+	-	+	+	+	-	+	-	+	-	+	+	-	-	-	+	+	-	-	+	+	-	-	+	+	-	-	+	+	+	-	+	-	+	-	+	-	+	-	+	-	-
1890	-	-	-	+	+	-	-	+	-	+	+	+	-	+	-	+	-	+	+	-	-	-	+	+	-	-	+	+	-	-	+	+	-	-	+	+	+	-	+	-	+	-	+	-	+	-	+	-	-
1900	-	-	-	+	+	-	-	+	-	+	+	+	-	+	-	+	-	+	+	-	-	-	+	+	-	-	+	+	-	-	+	+	-	-	+	+	+	-	+	-	+	-	+	-	+	-	+	-	-
1910	-	-	-	+	+	-	-	+	-	+	+	+	+	+	-	+	-	+	+	-	-	-	+	+	-	-	+	+	-	-	+	+	+	+	+	+	+	-	+	-	+	-	+	-	+	-	+	-	-
1920	-	-	-	+	+	-	-	+	-	+	+	+	+	+	-	+	-	+	+	-	-	-	+	+	-	-	+	+	-	-	+	+	+	+	+	+	+	-	+	-	+	-	+	-	+	-	+	-	-
1930	-	-	-	+	+	-	-	+	-	+	+	+	+	+	+	+	-	+	+	-	-	-	+	+	-	-	+	+	-	-	+	+	+	+	+	+	+	-	+	-	+	-	+	-	+	-	+	-	-
1940	-	-	-	+	+	-	-	+	-	+	+	+	+	+	+	+	-	+	+	-	-	-	+	+	-	-	+	+	-	-	+	+	+	+	+	+	+	-	+	-	+	-	+	-	+	-	+	-	-
1950	-	-	-	+	+	-	-	+	-	+	+	+	+	+	+	+	-	+	+	-	-	-	+	+	-	-	+	+	-	-	+	+	+	+	+	+	+	-	+	-	+	-	+	-	+	-	+	-	-
1960	-	-	-	+	+	-	-	+	-	+	+	+	+	+	+	+	-	+	+	-	-	-	+	+	-	-	+	+	-	-	+	+	+	+	+	+	+	-	+	-	+	-	+	-	+	-	+	-	-
1970	-	-	-	+	+	-	-	+	-	+	+	+	+	+	+	+	-	-	+	-	-	-	+	+	-	-	+	+	-	-	+	+	+	+	+	+	+	-	+	-	+	-	+	-	+	-	+	-	-
1980	-	-	+	+	+	-	-	+	-	+	+	+	+	+	+	+	-	-	+	-	-	-	+	+	-	-	+	+	-	-	+	+	+	+	+	+	+	-	+	-	+	-	+	-	+	-	+	-	-
1990	-	-	+	+	+	-	-	+	-	+	+	+	+	+	+	+	-	-	+	-	-	-	+	+	-	-	+	+	-	-	+	+	+	+	+	+	+	-	+	-	+	-	+	-	+	-	+	-	-
2000	-	-	+	+	+	-	-	+	-	+	+	+	+	+	+	+	-	-	+	-	-	-	+	+	-	-	+	+	-	-	+	+	+	+	+	+	+	-	+	-	-	-	+	-	+	-	+	-	-
Genes in 5' upstream
24-PHAS Loci	24-PHAS_chr2_1	24-PHAS_chr2_2	24-PHAS_chr2_3	24-PHAS_chr2_4	24-PHAS_chr2_5	24-PHAS_chr2_6	24-PHAS_chr2_7	24-PHAS_chr3_8	24-PHAS_chr4_11	24-PHAS_chr4_12	24-PHAS_chr4_13	24-PHAS_chr5_14	24-PHAS_chr5_15	24-PHAS_chr5_16	24-PHAS_chr5_17	24-PHAS_chr5_18	24-PHAS_chr5_19	24-PHAS_chr5_20	24-PHAS_chr5_21	24-PHAS_chr6_22	24-PHAS_chr6_24	24-PHAS_chr6_25	24-PHAS_chr6_26	24-PHAS_chr6_27	24-PHAS_chr6_28	24-PHAS_chr6_29	24-PHAS_chr6_30	24-PHAS_chr6_31	24-PHAS_chr6_32	24-PHAS_chr6_33	24-PHAS_chr6_34	24-PHAS_chr6_35	24-PHAS_chr6_36	24-PHAS_chr6_37	24-PHAS_chr6_38	24-PHAS_chr6_39	24-PHAS_chr6_40	24-PHAS_chr7_41	24-PHAS_chr7_43	24-PHAS_chr7_44	24-PHAS_chr7_45	24-PHAS_chr7_46	24-PHAS_chr7_47	24-PHAS_chr7_48	24-PHAS_chr7_49	24-PHAS_chr7_50	24-PHAS_chr8_51	24-PHAS_chr8_52	24-PHAS_chr8_53
Position (10 bp window)
-2000	-	-	-	-	-	+	-	-	-	-	-	-	-	+	-	-	+	-	+	-	-	-	-	-	-	-	-	+	-	-	-	-	-	-	-	-	-	+	-	-	-	-	-	-	-	-	-	-	-
-1990	-	-	-	-	-	+	-	-	-	-	-	-	-	+	-	-	+	-	+	-	-	-	-	-	-	-	-	+	-	-	-	-	-	-	-	-	-	+	-	-	-	-	-	-	-	-	-	-	-
-1980	-	-	-	-	-	+	-	-	-	-	-	-	-	+	-	-	+	-	+	-	-	-	-	-	-	-	-	+	-	-	-	-	-	-	-	-	-	+	-	-	-	-	-	-	-	-	-	-	-
-1970	-	-	-	-	-	+	-	-	-	-	-	-	-	+	-	-	+	-	+	-	-	-	-	-	-	-	-	+	-	-	-	-	-	-	-	-	-	+	-	-	-	-	-	-	-	-	-	-	-
-1960	-	-	-	-	-	+	-	-	-	-	-	-	-	+	-	-	+	-	+	-	-	-	-	-	-	-	-	+	-	-	-	-	-	-	-	-	-	+	-	-	-	-	-	-	-	-	-	-	-
-1950	-	-	-	-	-	+	-	-	-	-	-	-	-	+	-	-	+	-	+	-	-	-	-	-	-	-	-	+	-	-	-	-	-	-	-	-	-	+	-	-	-	-	-	-	-	-	-	-	-
-1940	-	-	-	-	-	+	-	-	-	-	-	-	-	+	-	-	+	-	+	-	-	-	-	-	-	-	-	+	-	-	-	-	-	-	-	-	-	+	-	-	-	-	-	-	-	-	-	-	-
-1930	-	-	-	-	-	+	-	-	-	-	-	-	-	+	-	-	+	-	+	-	-	-	-	-	-	-	-	+	-	-	-	-	-	-	-	-	-	+	-	-	-	-	-	-	-	-	-	-	-
-1920	-	-	-	-	-	+	-	-	-	-	-	-	-	+	-	-	+	-	+	-	-	-	-	-	-	-	-	+	-	-	-	-	-	-	-	-	-	+	-	-	-	-	-	-	-	-	-	-	-
-1910	-	-	-	-	-	+	-	-	-	-	-	-	-	+	-	-	+	-	+	-	-	-	-	-	-	-	-	+	-	-	-	-	-	-	-	-	-	+	-	-	-	-	-	-	-	-	-	-	-
-1900	-	-	-	-	-	+	-	-	-	-	-	-	-	+	-	-	+	-	+	-	-	-	-	-	-	-	-	+	-	-	-	-	-	-	-	-	-	+	-	-	-	-	-	-	-	-	-	-	-
-1890	-	-	-	-	-	+	-	-	-	-	-	-	-	+	-	-	+	-	+	-	-	-	-	-	-	-	-	+	-	-	-	-	-	-	-	-	-	+	-	-	-	-	-	-	-	-	-	-	-
-1880	-	-	-	-	-	+	-	-	-	-	-	-	-	+	-	-	+	-	+	-	-	-	-	-	-	-	-	+	-	-	-	-	-	-	-	-	-	+	-	-	-	-	-	-	-	-	-	-	-
-1870	-	-	-	-	-	+	-	-	-	-	-	-	-	+	-	-	+	-	+	-	-	-	-	-	-	-	-	+	-	-	-	-	-	-	-	-	-	+	-	-	-	-	-	-	-	-	-	-	-
-1860	-	-	-	-	-	+	-	-	-	-	-	-	-	+	-	-	+	-	+	-	-	-	-	-	-	-	-	+	-	-	-	-	-	-	-	-	-	+	-	-	-	-	-	-	-	-	-	-	-
-1850	-	-	-	-	-	+	-	-	-	-	-	-	-	+	-	-	+	-	+	-	-	-	-	-	-	-	-	+	-	-	-	-	-	-	-	-	-	+	-	-	-	-	-	-	-	-	-	-	-
-1840	-	-	-	-	-	+	-	-	-	-	-	-	-	+	-	-	+	-	+	-	-	-	-	-	-	-	-	+	-	-	-	-	-	-	-	-	-	+	-	-	-	-	-	-	-	-	-	-	-
-1830	-	-	-	-	-	+	-	-	-	-	-	-	-	+	-	-	+	-	+	-	-	-	-	-	-	-	-	+	-	-	-	-	-	-	-	-	-	+	-	-	-	-	-	-	-	-	-	-	-
-1820	-	-	-	-	-	+	-	-	-	-	-	-	-	+	-	-	+	-	+	-	-	-	-	-	-	-	-	-	-	-	-	-	-	-	-	-	-	+	-	-	-	-	-	-	-	-	-	-	-
-1810	-	-	-	-	-	+	-	-	-	-	-	-	-	+	-	-	+	-	+	-	-	-	-	-	-	-	-	-	-	-	-	-	-	-	-	-	-	+	-	-	-	-	-	-	-	-	-	-	-
-1800	-	-	-	-	-	+	-	-	-	-	-	-	-	+	-	-	+	-	+	-	-	-	-	-	-	-	-	-	-	-	-	-	-	-	-	-	-	+	-	-	-	-	-	-	-	-	-	-	-
-1790	-	-	-	-	-	+	-	-	-	-	-	-	-	+	-	-	+	-	+	-	-	-	-	-	-	-	-	-	-	-	-	-	-	-	-	-	-	+	-	-	-	-	-	-	-	-	-	-	-
-1780	-	-	-	-	-	+	-	-	-	-	-	-	-	+	-	-	+	-	+	-	-	-	-	-	-	-	-	-	-	-	-	-	-	-	-	-	-	+	-	-	-	-	-	-	-	-	-	-	-
-1770	-	-	-	-	-	+	-	-	-	-	-	-	-	+	-	-	+	-	+	-	-	-	-	-	-	-	-	-	-	-	-	-	-	-	-	-	-	+	-	-	-	-	-	-	-	-	-	-	-
-1760	-	-	-	-	-	+	-	-	-	-	-	-	-	+	-	-	+	-	+	-	-	-	-	-	-	-	-	-	-	-	-	-	-	-	-	-	-	+	-	-	-	-	-	-	-	-	-	-	-
-1750	-	-	-	-	-	+	-	-	-	-	-	-	-	+	-	-	+	-	+	-	-	-	-	-	-	-	-	-	-	-	-	-	-	-	-	-	-	+	-	-	-	-	-	-	-	-	-	-	-
-1740	-	-	-	-	-	+	-	-	-	-	-	-	-	+	-	-	+	-	+	-	-	-	-	-	-	-	-	-	-	-	-	-	-	-	-	-	-	+	-	-	-	-	-	-	-	-	-	-	-
-1730	-	-	-	-	-	+	-	-	-	-	-	-	-	+	-	-	+	-	+	-	-	-	-	-	-	-	-	-	-	-	-	-	-	-	-	-	-	+	-	-	-	-	-	-	-	-	-	-	-
-1720	-	-	-	-	-	+	-	-	-	-	-	-	-	+	-	-	+	-	+	-	-	-	-	-	-	-	-	-	-	-	-	-	-	-	-	-	-	+	-	-	-	-	-	-	-	-	-	-	-
-1710	-	-	-	-	-	+	-	-	-	-	-	-	-	+	-	-	+	-	+	-	-	-	-	-	-	-	-	-	-	-	-	-	-	-	-	-	-	+	-	-	-	-	-	-	-	-	-	-	-
-1700	-	-	-	-	-	+	-	-	-	-	-	-	-	+	-	-	+	-	+	-	-	-	-	-	-	-	-	-	-	-	-	-	-	-	-	-	-	+	-	-	-	-	-	-	-	-	-	-	-
-1690	-	-	-	-	-	+	-	-	-	-	-	-	-	+	-	-	+	-	+	-	-	-	-	-	-	-	-	-	-	-	-	-	-	-	-	-	-	+	-	-	-	-	-	-	-	-	-	-	-
-1680	-	-	-	-	-	+	-	-	-	-	-	-	-	+	-	-	+	-	+	-	-	-	-	-	-	-	-	-	-	-	-	-	-	-	-	-	-	+	-	-	-	-	-	-	-	-	-	-	-
-1670	-	-	-	-	-	+	-	-	-	-	-	-	-	+	-	-	+	-	+	-	-	-	-	-	-	-	-	-	-	-	-	-	-	-	-	-	-	+	-	-	-	-	-	-	-	-	-	-	-
-1660	-	-	-	-	-	+	-	-	-	-	-	-	-	+	-	-	+	-	+	-	-	-	-	-	-	-	-	-	-	-	-	-	-	-	-	-	-	+	-	-	-	-	-	-	-	-	-	-	-
-1650	-	-	-	-	-	+	-	-	-	-	-	-	-	+	-	-	+	-	+	-	-	-	-	-	-	-	-	-	-	-	-	-	-	-	-	-	-	+	-	-	-	-	-	-	-	-	-	-	-
-1640	-	-	-	-	-	+	-	-	-	-	-	-	-	+	-	-	+	-	+	-	-	-	-	-	-	-	-	-	-	-	-	-	-	-	-	-	-	+	-	-	-	-	-	-	-	-	-	-	-
-1630	-	-	-	-	-	+	-	-	-	-	-	-	-	+	-	-	+	-	+	-	-	-	-	-	-	-	-	-	-	-	-	-	-	-	-	-	-	+	-	-	-	-	-	-	-	-	-	-	-
-1620	-	-	-	-	-	+	-	-	-	-	-	-	-	+	-	-	+	-	+	-	-	-	-	-	-	-	-	-	-	-	-	-	-	-	-	-	-	+	-	-	-	-	-	-	-	-	-	-	-
-1610	-	-	-	-	-	+	-	-	-	-	-	-	-	+	-	-	+	-	+	-	-	-	-	-	-	-	-	-	-	-	-	-	-	-	-	-	-	+	-	-	-	-	-	-	-	-	-	-	-
-1600	-	-	-	-	-	+	-	-	-	-	-	-	-	+	-	-	+	-	+	-	-	-	-	-	-	-	-	-	-	-	-	-	-	-	-	-	-	+	-	-	-	-	-	-	-	-	-	-	-
-1590	-	-	-	-	-	+	-	-	-	-	-	-	-	+	-	-	+	-	+	-	-	-	-	-	-	-	-	-	-	-	-	-	-	-	-	-	-	+	-	-	-	-	-	-	-	-	-	-	-
-1580	-	-	-	-	-	+	-	-	-	-	-	-	-	+	-	-	+	-	+	-	-	-	-	-	-	-	-	-	-	-	-	-	-	-	-	-	-	+	-	-	-	-	-	-	-	-	-	-	-
-1570	-	-	-	-	-	+	-	-	-	-	-	-	-	+	-	-	+	-	+	-	-	-	-	-	-	-	-	-	-	-	-	-	-	-	-	-	-	+	-	-	-	-	-	-	-	-	-	-	-
-1560	-	-	-	-	-	+	-	-	-	-	-	-	-	+	-	-	+	-	+	-	-	-	-	-	-	-	-	-	-	-	-	-	-	-	-	-	-	+	-	-	-	-	-	-	-	-	-	-	-
-1550	-	-	-	-	-	+	-	-	-	-	-	-	-	+	-	-	+	-	+	-	-	-	-	-	-	-	-	-	-	-	-	-	-	-	-	-	-	+	-	-	-	-	-	-	-	-	-	-	-
-1540	-	-	-	-	-	+	-	-	-	-	-	-	-	+	-	-	+	-	+	-	-	-	-	-	-	-	-	-	-	-	-	-	-	-	-	-	-	+	-	-	-	-	-	-	-	-	-	-	-
-1530	-	-	-	-	-	+	-	-	-	-	-	-	-	+	-	-	+	-	+	-	-	-	-	-	-	-	-	-	-	-	-	-	-	-	-	-	-	+	-	-	-	-	-	-	-	-	-	-	-
-1520	-	-	-	-	-	+	-	-	-	-	-	-	-	+	-	-	+	-	+	-	-	-	-	-	-	-	-	-	-	-	-	-	-	-	-	-	-	+	-	-	-	-	-	-	-	-	-	-	-
-1510	-	-	-	-	-	+	-	-	-	-	-	-	-	+	-	-	+	-	+	-	-	-	-	-	-	-	-	-	-	-	-	-	-	-	-	-	-	+	-	-	-	-	-	-	-	-	-	-	-
-1500	-	-	-	-	-	+	-	-	-	-	-	-	-	+	-	-	+	-	+	-	-	-	-	-	-	-	-	-	-	-	-	-	-	-	-	-	-	+	-	-	-	-	-	-	-	-	-	-	-
-1490	-	-	-	-	-	+	-	-	-	-	-	-	-	+	-	-	+	-	-	-	-	-	-	-	-	-	-	-	-	-	-	-	-	-	-	-	-	+	-	-	-	-	-	-	-	-	-	-	-
-1480	-	-	-	-	-	+	-	-	-	-	-	-	-	+	-	-	+	-	-	-	-	-	-	-	-	-	-	-	-	-	-	-	-	-	-	-	-	+	-	-	-	-	-	-	-	-	-	-	-
-1470	-	-	-	-	-	+	-	-	-	-	-	-	-	+	-	-	+	-	-	-	-	-	-	-	-	-	-	-	-	-	-	-	-	-	-	-	-	+	-	-	-	-	-	-	-	-	-	-	-
-1460	-	-	-	-	-	+	-	-	-	-	-	-	-	+	-	-	+	-	-	-	-	-	-	-	-	-	-	-	-	-	-	-	-	-	-	-	-	+	-	-	-	-	-	-	-	-	-	-	-
-1450	-	-	-	-	-	+	-	-	-	-	-	-	-	+	-	-	+	-	-	-	-	-	-	-	-	-	-	-	-	-	-	-	-	-	-	-	-	+	-	-	-	-	-	-	-	-	-	-	-
-1440	-	-	-	-	-	+	-	-	-	-	-	-	-	+	-	-	+	-	-	-	-	-	-	-	-	-	-	-	-	-	-	-	-	-	-	-	-	+	-	-	-	-	-	-	-	-	-	-	-
-1430	-	-	-	-	-	+	-	-	-	-	-	-	-	+	-	-	+	-	-	-	-	-	-	-	-	-	-	-	-	-	-	-	-	-	-	-	-	+	-	-	-	-	-	-	-	-	-	-	-
-1420	-	-	-	-	-	+	-	-	-	-	-	-	-	+	-	-	+	-	-	-	-	-	-	-	-	-	-	-	-	-	-	-	-	-	-	-	-	+	-	-	-	-	-	-	-	-	-	-	-
-1410	-	-	-	-	-	+	-	-	-	-	-	-	-	+	-	-	+	-	-	-	-	-	-	-	-	-	-	-	-	-	-	-	-	-	-	-	-	+	-	-	-	-	-	-	-	-	-	-	-
-1400	-	-	-	-	-	+	-	-	-	-	-	-	-	+	-	-	+	-	-	-	-	-	-	-	-	-	-	-	-	-	-	-	-	-	-	-	-	+	-	-	-	-	-	-	-	-	-	-	-
-1390	-	-	-	-	-	+	-	-	-	-	-	-	-	+	-	-	+	-	-	-	-	-	-	-	-	-	-	-	-	-	-	-	-	-	-	-	-	+	-	-	-	-	-	-	-	-	-	-	-
-1380	-	-	-	-	-	+	-	-	-	-	-	-	-	+	-	-	+	-	-	-	-	-	-	-	-	-	-	-	-	-	-	-	-	-	-	-	-	+	-	-	-	-	-	-	-	-	-	-	-
-1370	-	-	-	-	-	+	-	-	-	-	-	-	-	+	-	-	+	-	-	-	-	-	-	-	-	-	-	-	-	-	-	-	-	-	-	-	-	+	-	-	-	-	-	-	-	-	-	-	-
-1360	-	-	-	-	-	+	-	-	-	-	-	-	-	+	-	-	+	-	-	-	-	-	-	-	-	-	-	-	-	-	-	-	-	-	-	-	-	+	-	-	-	-	-	-	-	-	-	-	-
-1350	-	-	-	-	-	+	-	-	-	-	-	-	-	+	-	-	+	-	-	-	-	-	-	-	-	-	-	-	-	-	-	-	-	-	-	-	-	+	-	-	-	-	-	-	-	-	-	-	-
-1340	-	-	-	-	-	+	-	-	-	-	-	-	-	+	-	-	+	-	-	-	-	-	-	-	-	-	-	-	-	-	-	-	-	-	-	-	-	+	-	-	-	-	-	-	-	-	-	-	-
-1330	-	-	-	-	-	+	-	-	-	-	-	-	-	+	-	-	+	-	-	-	-	-	-	-	-	-	-	-	-	-	-	-	-	-	-	-	-	+	-	-	-	-	-	-	-	-	-	-	-
-1320	-	-	-	-	-	+	-	-	-	-	-	-	-	+	-	-	+	-	-	-	-	-	-	-	-	-	-	-	-	-	-	-	-	-	-	-	-	+	-	-	-	-	-	-	-	-	-	-	-
-1310	-	-	-	-	-	+	-	-	-	-	-	-	-	+	-	-	+	-	-	-	-	-	-	-	-	-	-	-	-	-	-	-	-	-	-	-	-	+	-	-	-	-	-	-	-	-	-	-	-
-1300	-	-	-	-	-	+	-	-	-	-	-	-	-	+	-	-	+	-	-	-	-	-	-	-	-	-	-	-	-	-	-	-	-	-	-	-	-	+	-	-	-	-	-	-	-	-	-	-	-
-1290	-	-	-	-	-	+	-	-	-	-	-	-	-	+	-	-	+	-	-	-	-	-	-	-	-	-	-	-	-	-	-	-	-	-	-	-	-	+	-	-	-	-	-	-	-	-	-	-	-
-1280	-	-	-	-	-	+	-	-	-	-	-	-	-	+	-	-	+	-	-	-	-	-	-	-	-	-	-	-	-	-	-	-	-	-	-	-	-	+	-	-	-	-	-	-	-	-	-	-	-
-1270	-	-	-	-	-	+	-	-	-	-	-	-	-	+	-	-	+	-	-	-	-	-	-	-	-	-	-	-	-	-	-	-	-	-	-	-	-	+	-	-	-	-	-	-	-	-	-	-	-
-1260	-	-	-	-	-	+	-	-	-	-	-	-	-	+	-	-	+	-	-	-	-	-	-	-	-	-	-	-	-	-	-	-	-	-	-	-	-	+	-	-	-	-	-	-	-	-	-	-	-
-1250	-	-	-	-	-	+	-	-	-	-	-	-	-	+	-	-	+	-	-	-	-	-	-	-	-	-	-	-	-	-	-	-	-	-	-	-	-	+	-	-	-	-	-	-	-	-	-	-	-
-1240	-	-	-	-	-	+	-	-	-	-	-	-	-	+	-	-	+	-	-	-	-	-	-	-	-	-	-	-	-	-	-	-	-	-	-	-	-	+	-	-	-	-	-	-	-	-	-	-	-
-1230	-	-	-	-	-	+	-	-	-	-	-	-	-	+	-	-	+	-	-	-	-	-	-	-	-	-	-	-	-	-	-	-	-	-	-	-	-	+	-	-	-	-	-	-	-	-	-	-	-
-1220	-	-	-	-	-	+	-	-	-	-	-	-	-	+	-	-	+	-	-	-	-	-	-	-	-	-	-	-	-	-	-	-	-	-	-	-	-	+	-	-	-	-	-	-	-	-	-	-	-
-1210	-	-	-	-	-	+	-	-	-	-	-	-	-	+	-	-	+	-	-	-	-	-	-	-	-	-	-	-	-	-	-	-	-	-	-	-	-	+	-	-	-	-	-	-	-	-	-	-	-
-1200	-	-	-	-	-	+	-	-	-	-	-	-	-	+	-	-	+	-	-	-	-	-	-	-	-	-	-	-	-	-	-	-	-	-	-	-	-	+	-	-	-	-	-	-	-	-	-	-	-
-1190	-	-	-	-	-	+	-	-	-	-	-	-	-	+	-	-	+	-	-	-	-	-	-	-	-	-	-	-	-	-	-	-	-	-	-	-	-	+	-	-	-	-	-	-	-	-	-	-	-
-1180	-	-	-	-	-	+	-	-	-	-	-	-	-	+	-	-	+	-	-	-	-	-	-	-	-	-	-	-	-	-	-	-	-	-	-	-	-	+	-	-	-	-	-	-	-	-	-	-	-
-1170	-	-	-	-	-	+	-	-	-	-	-	-	-	+	-	-	+	-	-	-	-	-	-	-	-	-	-	-	-	-	-	-	-	-	-	-	-	+	-	-	-	-	-	-	-	-	-	-	-
-1160	-	-	-	-	-	+	-	-	-	-	-	-	-	+	-	-	+	-	-	-	-	-	-	-	-	-	-	-	-	-	-	-	-	-	-	-	-	+	-	-	-	-	-	-	-	-	-	-	-
-1150	-	-	-	-	-	+	-	-	-	-	-	-	-	+	-	-	+	-	-	-	-	-	-	-	-	-	-	-	-	-	-	-	-	-	-	-	-	+	-	-	-	-	-	-	-	-	-	-	-
-1140	-	-	-	-	-	+	-	-	-	-	-	-	-	+	-	-	+	-	-	-	-	-	-	-	-	-	-	-	-	-	-	-	-	-	-	-	-	+	-	-	-	-	-	-	-	-	-	-	-
-1130	-	-	-	-	-	+	-	-	-	-	-	-	-	+	-	-	+	-	-	-	-	-	-	-	-	-	-	-	-	-	-	-	-	-	-	-	-	+	-	-	-	-	-	-	-	-	-	-	-
-1120	-	-	-	-	-	+	-	-	-	-	-	-	-	+	-	-	+	-	-	-	-	-	-	-	-	-	-	-	-	-	-	-	-	-	-	-	-	+	-	-	-	-	-	-	-	-	-	-	-
-1110	-	-	-	-	-	+	-	-	-	-	-	-	-	+	-	-	+	-	-	-	-	-	-	-	-	-	-	-	-	-	-	-	-	-	-	-	-	+	-	-	-	-	-	-	-	-	-	-	-
-1100	-	-	-	-	-	+	-	-	-	-	-	-	-	+	-	-	+	-	-	-	-	-	-	-	-	-	-	-	-	-	-	-	-	-	-	-	-	+	-	-	-	-	-	-	-	-	-	-	-
-1090	-	-	-	-	-	+	-	-	-	-	-	-	-	+	-	-	+	-	-	-	-	-	-	-	-	-	-	-	-	-	-	-	-	-	-	-	-	+	-	-	-	-	-	-	-	-	-	-	-
-1080	-	-	-	-	-	+	-	-	-	-	-	-	-	+	-	-	+	-	-	-	-	-	-	-	-	-	-	-	-	-	-	-	-	-	-	-	-	+	-	-	-	-	-	-	-	-	-	-	-
-1070	-	-	-	-	-	+	-	-	-	-	-	-	-	+	-	-	+	-	-	-	-	-	-	-	-	-	-	-	-	-	-	-	-	-	-	-	-	+	-	-	-	-	-	-	-	-	-	-	-
-1060	-	-	-	-	-	+	-	-	-	-	-	-	-	+	-	-	+	-	-	-	-	-	-	-	-	-	-	-	-	-	-	-	-	-	-	-	-	+	-	-	-	-	-	-	-	-	-	-	-
-1050	-	-	-	-	-	+	-	-	-	-	-	-	-	+	-	-	+	-	-	-	-	-	-	-	-	-	-	-	-	-	-	-	-	-	-	-	-	+	-	-	-	-	-	-	-	-	-	-	-
-1040	-	-	-	-	-	+	-	-	-	-	-	-	-	+	-	-	+	-	-	-	-	-	-	-	-	-	-	-	-	-	-	-	-	-	-	-	-	+	-	-	-	-	-	-	-	-	-	-	-
-1030	-	-	-	-	-	+	-	-	-	-	-	-	-	-	-	-	+	-	-	-	-	-	-	-	-	-	-	-	-	-	-	-	-	-	-	-	-	+	-	-	-	-	-	-	-	-	-	-	-
-1020	-	-	-	-	-	+	-	-	-	-	-	-	-	-	-	-	+	-	-	-	-	-	-	-	-	-	-	-	-	-	-	-	-	-	-	-	-	+	-	-	-	-	-	-	-	-	-	-	-
-1010	-	-	-	-	-	+	-	-	-	-	-	-	-	-	-	-	+	-	-	-	-	-	-	-	-	-	-	-	-	-	-	-	-	-	-	-	-	+	-	-	-	-	-	-	-	-	-	-	-
-1000	-	-	-	-	-	+	-	-	-	-	-	-	-	-	-	-	+	-	-	-	-	-	-	-	-	-	-	-	-	-	-	-	-	-	-	-	-	+	-	-	-	-	-	-	-	-	-	-	-
-990	-	-	-	-	-	+	-	-	-	-	-	-	-	-	-	-	+	-	-	-	-	-	-	-	-	-	-	-	-	-	-	-	-	-	-	-	-	+	-	-	-	-	-	-	-	-	-	-	-
-980	-	-	-	-	-	+	-	-	-	-	-	-	-	-	-	-	+	-	-	-	-	-	-	-	-	-	-	-	-	-	-	-	-	-	-	-	-	+	-	-	-	-	-	-	-	-	-	-	-
-970	-	-	-	-	-	+	-	-	-	-	-	-	-	-	-	-	+	-	-	-	-	-	-	-	-	-	-	-	-	-	-	-	-	-	-	-	-	+	-	-	-	-	-	-	-	-	-	-	-
-960	-	-	-	-	-	+	-	-	-	-	-	-	-	-	-	-	+	-	-	-	-	-	-	-	-	-	-	-	-	-	-	-	-	-	-	-	-	+	-	-	-	-	-	-	-	-	-	-	-
-950	-	-	-	-	-	+	-	-	-	-	-	-	-	-	-	-	+	-	-	-	-	-	-	-	-	-	-	-	-	-	-	-	-	-	-	-	-	+	-	-	-	-	-	-	-	-	-	-	-
-940	-	-	-	-	-	+	-	-	-	-	-	-	-	-	-	-	+	-	-	-	-	-	-	-	-	-	-	-	-	-	-	-	-	-	-	-	-	+	-	-	-	-	-	-	-	-	-	-	-
-930	-	-	-	-	-	+	-	-	-	-	-	-	-	-	-	-	+	-	-	-	-	-	-	-	-	-	-	-	-	-	-	-	-	-	-	-	-	+	-	-	-	-	-	-	-	-	-	-	-
-920	-	-	-	-	-	+	-	-	-	-	-	-	-	-	-	-	+	-	-	-	-	-	-	-	-	-	-	-	-	-	-	-	-	-	-	-	-	+	-	-	-	-	-	-	-	-	-	-	-
-910	-	-	-	-	-	-	-	-	-	-	-	-	-	-	-	-	+	-	-	-	-	-	-	-	-	-	-	-	-	-	-	-	-	-	-	-	-	+	-	-	-	-	-	-	-	-	-	-	-
-900	-	-	-	-	-	-	-	-	-	-	-	-	-	-	-	-	+	-	-	-	-	-	-	-	-	-	-	-	-	-	-	-	-	-	-	-	-	+	-	-	-	-	-	-	-	-	-	-	-
-890	-	-	-	-	-	-	-	-	-	-	-	-	-	-	-	-	+	-	-	-	-	-	-	-	-	-	-	-	-	-	-	-	-	-	-	-	-	+	-	-	-	-	-	-	-	-	-	-	-
-880	-	-	-	-	-	-	-	-	-	-	-	-	-	-	-	-	+	-	-	-	-	-	-	-	-	-	-	-	-	-	-	-	-	-	-	-	-	+	-	-	-	-	-	-	-	-	-	-	-
-870	-	-	-	-	-	-	-	-	-	-	-	-	-	-	-	-	+	-	-	-	-	-	-	-	-	-	-	-	-	-	-	-	-	-	-	-	-	-	-	-	-	-	-	-	-	-	-	-	-
-860	-	-	-	-	-	-	-	-	-	-	-	-	-	-	-	-	+	-	-	-	-	-	-	-	-	-	-	-	-	-	-	-	-	-	-	-	-	-	-	-	-	-	-	-	-	-	-	-	-
-850	-	-	-	-	-	-	-	-	-	-	-	-	-	-	-	-	+	-	-	-	-	-	-	-	-	-	-	-	-	-	-	-	-	-	-	-	-	-	-	-	-	-	-	-	-	-	-	-	-
-840	-	-	-	-	-	-	-	-	-	-	-	-	-	-	-	-	+	-	-	-	-	-	-	-	-	-	-	-	-	-	-	-	-	-	-	-	-	-	-	-	-	-	-	-	-	-	-	-	-
-830	-	-	-	-	-	-	-	-	-	-	-	-	-	-	-	-	+	-	-	-	-	-	-	-	-	-	-	-	-	-	-	-	-	-	-	-	-	-	-	-	-	-	-	-	-	-	-	-	-
-820	-	-	-	-	-	-	-	-	-	-	-	-	-	-	-	-	+	-	-	-	-	-	-	-	-	-	-	-	-	-	-	-	-	-	-	-	-	-	-	-	-	-	-	-	-	-	-	-	-
-810	-	-	-	-	-	-	-	-	-	-	-	-	-	-	-	-	+	-	-	-	-	-	-	-	-	-	-	-	-	-	-	-	-	-	-	-	-	-	-	-	-	-	-	-	-	-	-	-	-
-800	-	-	-	-	-	-	-	-	-	-	-	-	-	-	-	-	+	-	-	-	-	-	-	-	-	-	-	-	-	-	-	-	-	-	-	-	-	-	-	-	-	-	-	-	-	-	-	-	-
-790	-	-	-	-	-	-	-	-	-	-	-	-	-	-	-	-	+	-	-	-	-	-	-	-	-	-	-	-	-	-	-	-	-	-	-	-	-	-	-	-	-	-	-	-	-	-	-	-	-
-780	-	-	-	-	-	-	-	-	-	-	-	-	-	-	-	-	+	-	-	-	-	-	-	-	-	-	-	-	-	-	-	-	-	-	-	-	-	-	-	-	-	-	-	-	-	-	-	-	-
-770	-	-	-	-	-	-	-	-	-	-	-	-	-	-	-	-	+	-	-	-	-	-	-	-	-	-	-	-	-	-	-	-	-	-	-	-	-	-	-	-	-	-	-	-	-	-	-	-	-
-760	-	-	-	-	-	-	-	-	-	-	-	-	-	-	-	-	+	-	-	-	-	-	-	-	-	-	-	-	-	-	-	-	-	-	-	-	-	-	-	-	-	-	-	-	-	-	-	-	-
-750	-	-	-	-	-	-	-	-	-	-	-	-	-	-	-	-	+	-	-	-	-	-	-	-	-	-	-	-	-	-	-	-	-	-	-	-	-	-	-	-	-	-	-	-	-	-	-	-	-
-740	-	-	-	-	-	-	-	-	-	-	-	-	-	-	-	-	+	-	-	-	-	-	-	-	-	-	-	-	-	-	-	-	-	-	-	-	-	-	-	-	-	-	-	-	-	-	-	-	-
-730	-	-	-	-	-	-	-	-	-	-	-	-	-	-	-	-	+	-	-	-	-	-	-	-	-	-	-	-	-	-	-	-	-	-	-	-	-	-	-	-	-	-	-	-	-	-	-	-	-
-720	-	-	-	-	-	-	-	-	-	-	-	-	-	-	-	-	+	-	-	-	-	-	-	-	-	-	-	-	-	-	-	-	-	-	-	-	-	-	-	-	-	-	-	-	-	-	-	-	-
-710	-	-	-	-	-	-	-	-	-	-	-	-	-	-	-	-	+	-	-	-	-	-	-	-	-	-	-	-	-	-	-	-	-	-	-	-	-	-	-	-	-	-	-	-	-	-	-	-	-
-700	-	-	-	-	-	-	-	-	-	-	-	-	-	-	-	-	+	-	-	-	-	-	-	-	-	-	-	-	-	-	-	-	-	-	-	-	-	-	-	-	-	-	-	-	-	-	-	-	-
-690	-	-	-	-	-	-	-	-	-	-	-	-	-	-	-	-	+	-	-	-	-	-	-	-	-	-	-	-	-	-	-	-	-	-	-	-	-	-	-	-	-	-	-	-	-	-	-	-	-
-680	-	-	-	-	-	-	-	-	-	-	-	-	-	-	-	-	+	-	-	-	-	-	-	-	-	-	-	-	-	-	-	-	-	-	-	-	-	-	-	-	-	-	-	-	-	-	-	-	-
-670	-	-	-	-	-	-	-	-	-	-	-	-	-	-	-	-	+	-	-	-	-	-	-	-	-	-	-	-	-	-	-	-	-	-	-	-	-	-	-	-	-	-	-	-	-	-	-	-	-
-660	-	-	-	-	-	-	-	-	-	-	-	-	-	-	-	-	+	-	-	-	-	-	-	-	-	-	-	-	-	-	-	-	-	-	-	-	-	-	-	-	-	-	-	-	-	-	-	-	-
-650	-	-	-	-	-	-	-	-	-	-	-	-	-	-	-	-	+	-	-	-	-	-	-	-	-	-	-	-	-	-	-	-	-	-	-	-	-	-	-	-	-	-	-	-	-	-	-	-	-
-640	-	-	-	-	-	-	-	-	-	-	-	-	-	-	-	-	+	-	-	-	-	-	-	-	-	-	-	-	-	-	-	-	-	-	-	-	-	-	-	-	-	-	-	-	-	-	-	-	-
-630	-	-	-	-	-	-	-	-	-	-	-	-	-	-	-	-	+	-	-	-	-	-	-	-	-	-	-	-	-	-	-	-	-	-	-	-	-	-	-	-	-	-	-	-	-	-	-	-	-
-620	-	-	-	-	-	-	-	-	-	-	-	-	-	-	-	-	+	-	-	-	-	-	-	-	-	-	-	-	-	-	-	-	-	-	-	-	-	-	-	-	-	-	-	-	-	-	-	-	-
-610	-	-	-	-	-	-	-	-	-	-	-	-	-	-	-	-	+	-	-	-	-	-	-	-	-	-	-	-	-	-	-	-	-	-	-	-	-	-	-	-	-	-	-	-	-	-	-	-	-
-600	-	-	-	-	-	-	-	-	-	-	-	-	-	-	-	-	+	-	-	-	-	-	-	-	-	-	-	-	-	-	-	-	-	-	-	-	-	-	-	-	-	-	-	-	-	-	-	-	-
-590	-	-	-	-	-	-	-	-	-	-	-	-	-	-	-	-	+	-	-	-	-	-	-	-	-	-	-	-	-	-	-	-	-	-	-	-	-	-	-	-	-	-	-	-	-	-	-	-	-
-580	-	-	-	-	-	-	-	-	-	-	-	-	-	-	-	-	+	-	-	-	-	-	-	-	-	-	-	-	-	-	-	-	-	-	-	-	-	-	-	-	-	-	-	-	-	-	-	-	-
-570	-	-	-	-	-	-	-	-	-	-	-	-	-	-	-	-	+	-	-	-	-	-	-	-	-	-	-	-	-	-	-	-	-	-	-	-	-	-	-	-	-	-	-	-	-	-	-	-	-
-560	-	-	-	-	-	-	-	-	-	-	-	-	-	-	-	-	+	-	-	-	-	-	-	-	-	-	-	-	-	-	-	-	-	-	-	-	-	-	-	-	-	-	-	-	-	-	-	-	-
-550	-	-	-	-	-	-	-	-	-	-	-	-	-	-	-	-	+	-	-	-	-	-	-	-	-	-	-	-	-	-	-	-	-	-	-	-	-	-	-	-	-	-	-	-	-	-	-	-	-
-540	-	-	-	-	-	-	-	-	-	-	-	-	-	-	-	-	+	-	-	-	-	-	-	-	-	-	-	-	-	-	-	-	-	-	-	-	-	-	-	-	-	-	-	-	-	-	-	-	-
-530	-	-	-	-	-	-	-	-	-	-	-	-	-	-	-	-	+	-	-	-	-	-	-	-	-	-	-	-	-	-	-	-	-	-	-	-	-	-	-	-	-	-	-	-	-	-	-	-	-
-520	-	-	-	-	-	-	-	-	-	-	-	-	-	-	-	-	+	-	-	-	-	-	-	-	-	-	-	-	-	-	-	-	-	-	-	-	-	-	-	-	-	-	-	-	-	-	-	-	-
-510	-	-	-	-	-	-	-	-	-	-	-	-	-	-	-	-	+	-	-	-	-	-	-	-	-	-	-	-	-	-	-	-	-	-	-	-	-	-	-	-	-	-	-	-	-	-	-	-	-
-500	-	-	-	-	-	-	-	-	-	-	-	-	-	-	-	-	+	-	-	-	-	-	-	-	-	-	-	-	-	-	-	-	-	-	-	-	-	-	-	-	-	-	-	-	-	-	-	-	-
-490	-	-	-	-	-	-	-	-	-	-	-	-	-	-	-	-	+	-	-	-	-	-	-	-	-	-	-	-	-	-	-	-	-	-	-	-	-	-	-	-	-	-	-	-	-	-	-	-	-
-480	-	-	-	-	-	-	-	-	-	-	-	-	-	-	-	-	+	-	-	-	-	-	-	-	-	-	-	-	-	-	-	-	-	-	-	-	-	-	-	-	-	-	-	-	-	-	-	-	-
-470	-	-	-	-	-	-	-	-	-	-	-	-	-	-	-	-	+	-	-	-	-	-	-	-	-	-	-	-	-	-	-	-	-	-	-	-	-	-	-	-	-	-	-	-	-	-	-	-	-
-460	-	-	-	-	-	-	-	-	-	-	-	-	-	-	-	-	+	-	-	-	-	-	-	-	-	-	-	-	-	-	-	-	-	-	-	-	-	-	-	-	-	-	-	-	-	-	-	-	-
-450	-	-	-	-	-	-	-	-	-	-	-	-	-	-	-	-	+	-	-	-	-	-	-	-	-	-	-	-	-	-	-	-	-	-	-	-	-	-	-	-	-	-	-	-	-	-	-	-	-
-440	-	-	-	-	-	-	-	-	-	-	-	-	-	-	-	-	+	-	-	-	-	-	-	-	-	-	-	-	-	-	-	-	-	-	-	-	-	-	-	-	-	-	-	-	-	-	-	-	-
-430	-	-	-	-	-	-	-	-	-	-	-	-	-	-	-	-	+	-	-	-	-	-	-	-	-	-	-	-	-	-	-	-	-	-	-	-	-	-	-	-	-	-	-	-	-	-	-	-	-
-420	-	-	-	-	-	-	-	-	-	-	-	-	-	-	-	-	+	-	-	-	-	-	-	-	-	-	-	-	-	-	-	-	-	-	-	-	-	-	-	-	-	-	-	-	-	-	-	-	-
-410	-	-	-	-	-	-	-	-	-	-	-	-	-	-	-	-	+	-	-	-	-	-	-	-	-	-	-	-	-	-	-	-	-	-	-	-	-	-	-	-	-	-	-	-	-	-	-	-	-
-400	-	-	-	-	-	-	-	-	-	-	-	-	-	-	-	-	+	-	-	-	-	-	-	-	-	-	-	-	-	-	-	-	-	-	-	-	-	-	-	-	-	-	-	-	-	-	-	-	-
-390	-	-	-	-	-	-	-	-	-	-	-	-	-	-	-	-	+	-	-	-	-	-	-	-	-	-	-	-	-	-	-	-	-	-	-	-	-	-	-	-	-	-	-	-	-	-	-	-	-
-380	-	-	-	-	-	-	-	-	-	-	-	-	-	-	-	-	+	-	-	-	-	-	-	-	-	-	-	-	-	-	-	-	-	-	-	-	-	-	-	-	-	-	-	-	-	-	-	-	-
-370	-	-	-	-	-	-	-	-	-	-	-	-	-	-	-	-	+	-	-	-	-	-	-	-	-	-	-	-	-	-	-	-	-	-	-	-	-	-	-	-	-	-	-	-	-	-	-	-	-
-360	-	-	-	-	-	-	-	-	-	-	-	-	-	-	-	-	+	-	-	-	-	-	-	-	-	-	-	-	-	-	-	-	-	-	-	-	-	-	-	-	-	-	-	-	-	-	-	-	-
-350	-	-	-	-	-	-	-	-	-	-	-	-	-	-	-	-	-	-	-	-	-	-	-	-	-	-	-	-	-	-	-	-	-	-	-	-	-	-	-	-	-	-	-	-	-	-	-	-	-
-340	-	-	-	-	-	-	-	-	-	-	-	-	-	-	-	-	-	-	-	-	-	-	-	-	-	-	-	-	-	-	-	-	-	-	-	-	-	-	-	-	-	-	-	-	-	-	-	-	-
-330	-	-	-	-	-	-	-	-	-	-	-	-	-	-	-	-	-	-	-	-	-	-	-	-	-	-	-	-	-	-	-	-	-	-	-	-	-	-	-	-	-	-	-	-	-	-	-	-	-
-320	-	-	-	-	-	-	-	-	-	-	-	-	-	-	-	-	-	-	-	-	-	-	-	-	-	-	-	-	-	-	-	-	-	-	-	-	-	-	-	-	-	-	-	-	-	-	-	-	-
-310	-	-	-	-	-	-	-	-	-	-	-	-	-	-	-	-	-	-	-	-	-	-	-	-	-	-	-	-	-	-	-	-	-	-	-	-	-	-	-	-	-	-	-	-	-	-	-	-	-
-300	-	-	-	-	-	-	-	-	-	-	-	-	-	-	-	-	-	-	-	-	-	-	-	-	-	-	-	-	-	-	-	-	-	-	-	-	-	-	-	-	-	-	-	-	-	-	-	-	-
-290	-	-	-	-	-	-	-	-	-	-	-	-	-	-	-	-	-	-	-	-	-	-	-	-	-	-	-	-	-	-	-	-	-	-	-	-	-	-	-	-	-	-	-	-	-	-	-	-	-
-280	-	-	-	-	-	-	-	-	-	-	-	-	-	-	-	-	-	-	-	-	-	-	-	-	-	-	-	-	-	-	-	-	-	-	-	-	-	-	-	-	-	-	-	-	-	-	-	-	-
-270	-	-	-	-	-	-	-	-	-	-	-	-	-	-	-	-	-	-	-	-	-	-	-	-	-	-	-	-	-	-	-	-	-	-	-	-	-	-	-	-	-	-	-	-	-	-	-	-	-
-260	-	-	-	-	-	-	-	-	-	-	-	-	-	-	-	-	-	-	-	-	-	-	-	-	-	-	-	-	-	-	-	-	-	-	-	-	-	-	-	-	-	-	-	-	-	-	-	-	-
-250	-	-	-	-	-	-	-	-	-	-	-	-	-	-	-	-	-	-	-	-	-	-	-	-	-	-	-	-	-	-	-	-	-	-	-	-	-	-	-	-	-	-	-	-	-	-	-	-	-
-240	-	-	-	-	-	-	-	-	-	-	-	-	-	-	-	-	-	-	-	-	-	-	-	-	-	-	-	-	-	-	-	-	-	-	-	-	-	-	-	-	-	-	-	-	-	-	-	-	-
-230	-	-	-	-	-	-	-	-	-	-	-	-	-	-	-	-	-	-	-	-	-	-	-	-	-	-	-	-	-	-	-	-	-	-	-	-	-	-	-	-	-	-	-	-	-	-	-	-	-
-220	-	-	-	-	-	-	-	-	-	-	-	-	-	-	-	-	-	-	-	-	-	-	-	-	-	-	-	-	-	-	-	-	-	-	-	-	-	-	-	-	-	-	-	-	-	-	-	-	-
-210	-	-	-	-	-	-	-	-	-	-	-	-	-	-	-	-	-	-	-	-	-	-	-	-	-	-	-	-	-	-	-	-	-	-	-	-	-	-	-	-	-	-	-	-	-	-	-	-	-
-200	-	-	-	-	-	-	-	-	-	-	-	-	-	-	-	-	-	-	-	-	-	-	-	-	-	-	-	-	-	-	-	-	-	-	-	-	-	-	-	-	-	-	-	-	-	-	-	-	-
-190	-	-	-	-	-	-	-	-	-	-	-	-	-	-	-	-	-	-	-	-	-	-	-	-	-	-	-	-	-	-	-	-	-	-	-	-	-	-	-	-	-	-	-	-	-	-	-	-	-
-180	-	-	-	-	-	-	-	-	-	-	-	-	-	-	-	-	-	-	-	-	-	-	-	-	-	-	-	-	-	-	-	-	-	-	-	-	-	-	-	-	-	-	-	-	-	-	-	-	-
-170	-	-	-	-	-	-	-	-	-	-	-	-	-	-	-	-	-	-	-	-	-	-	-	-	-	-	-	-	-	-	-	-	-	-	-	-	-	-	-	-	-	-	-	-	-	-	-	-	-
-160	-	-	-	-	-	-	-	-	-	-	-	-	-	-	-	-	-	-	-	-	-	-	-	-	-	-	-	-	-	-	-	-	-	-	-	-	-	-	-	-	-	-	-	-	-	-	-	-	-
-150	-	-	-	-	-	-	-	-	-	-	-	-	-	-	-	-	-	-	-	-	-	-	-	-	-	-	-	-	-	-	-	-	-	-	-	-	-	-	-	-	-	-	-	-	-	-	-	-	-
-140	-	-	-	-	-	-	-	-	-	-	-	-	-	-	-	-	-	-	-	-	-	-	-	-	-	-	-	-	-	-	-	-	-	-	-	-	-	-	-	-	-	-	-	-	-	-	-	-	-
-130	-	-	-	-	-	-	-	-	-	-	-	-	-	-	-	-	-	-	-	-	-	-	-	-	-	-	-	-	-	-	-	-	-	-	-	-	-	-	-	-	-	-	-	-	-	-	-	-	-
-120	-	-	-	-	-	-	-	-	-	-	-	-	-	-	-	-	-	-	-	-	-	-	-	-	-	-	-	-	-	-	-	-	-	-	-	-	-	-	-	-	-	-	-	-	-	-	-	-	-
-110	-	-	-	-	-	-	-	-	-	-	-	-	-	-	-	-	-	-	-	-	-	-	-	-	-	-	-	-	-	-	-	-	-	-	-	-	-	-	-	-	-	-	-	-	-	-	-	-	-
-100	-	-	-	-	-	-	-	-	-	-	-	-	-	-	-	-	-	-	-	-	-	-	-	-	-	-	-	-	-	-	-	-	-	-	-	-	-	-	-	-	-	-	-	-	-	-	-	-	-
-90	-	-	-	-	-	-	-	-	-	-	-	-	-	-	-	-	-	-	-	-	-	-	-	-	-	-	-	-	-	-	-	-	-	-	-	-	-	-	-	-	-	-	-	-	-	-	-	-	-
-80	-	-	-	-	-	-	-	-	-	-	-	-	-	-	-	-	-	-	-	-	-	-	-	-	-	-	-	-	-	-	-	-	-	-	-	-	-	-	-	-	-	-	-	-	-	-	-	-	-
-70	-	-	-	-	-	-	-	-	-	-	-	-	-	-	-	-	-	-	-	-	-	-	-	-	-	-	-	-	-	-	-	-	-	-	-	-	-	-	-	-	-	-	-	-	-	-	-	-	-
-60	-	-	-	-	-	-	-	-	-	-	-	-	-	-	-	-	-	-	-	-	-	-	-	-	-	-	-	-	-	-	-	-	-	-	-	-	-	-	-	-	-	-	-	-	-	-	-	-	-
-50	-	-	-	-	-	-	-	-	-	-	-	-	-	-	-	-	-	-	-	-	-	-	-	-	-	-	-	-	-	-	-	-	-	-	-	-	-	-	-	-	-	-	-	-	-	-	-	-	-
-40	-	-	-	-	-	-	-	-	-	-	-	-	-	-	-	-	-	-	-	-	-	-	-	-	-	-	-	-	-	-	-	-	-	-	-	-	-	-	-	-	-	-	-	-	-	-	-	-	-
-30	-	-	-	-	-	-	-	-	-	-	-	-	-	-	-	-	-	-	-	-	-	-	-	-	-	-	-	-	-	-	-	-	-	-	-	-	-	-	-	-	-	-	-	-	-	-	-	-	-
-20	-	-	-	-	-	-	-	-	-	-	-	-	-	-	-	-	-	-	-	-	-	-	-	-	-	-	-	-	-	-	-	-	-	-	-	-	-	-	-	-	-	-	-	-	-	-	-	-	-
-10	-	-	-	-	-	-	-	-	-	-	-	-	-	-	-	-	-	-	-	-	-	-	-	-	-	-	-	-	-	-	-	-	-	-	-	-	-	-	-	-	-	-	-	-	-	-	-	-	-
0	-	-	-	-	-	-	-	-	-	-	-	-	-	-	-	-	-	-	-	-	-	-	-	-	-	-	-	-	-	-	-	-	-	-	-	-	-	-	-	-	-	-	-	-	-	-	-	-	-
10	-	-	-	-	-	-	-	-	-	-	-	-	-	-	-	-	-	-	-	-	-	-	-	-	-	-	-	-	-	-	-	-	-	-	-	-	-	-	-	-	-	-	-	-	-	-	-	-	-
20	-	-	-	-	-	-	-	-	-	-	-	-	-	-	-	-	-	-	-	-	-	-	-	-	-	-	-	-	-	-	-	-	-	-	-	-	-	-	-	-	-	-	-	-	-	-	-	-	-
30	-	-	-	-	-	-	-	-	-	-	-	-	-	-	-	-	-	-	-	-	-	-	-	-	-	-	-	-	-	-	-	-	-	-	-	-	-	-	-	-	-	-	-	-	-	-	-	-	-
40	-	-	-	-	-	-	-	-	-	-	-	-	-	-	-	-	-	-	-	-	-	-	-	-	-	-	-	-	-	-	-	-	-	-	-	-	-	-	-	-	-	-	-	-	-	-	-	-	-
50	-	-	-	-	-	-	-	-	-	-	-	-	-	-	-	-	-	-	-	-	-	-	-	-	-	-	-	-	-	-	-	-	-	-	-	-	-	-	-	-	-	-	-	-	-	-	-	-	-
60	-	-	-	-	-	-	-	-	-	-	-	-	-	-	-	-	-	-	-	-	-	-	-	-	-	-	-	-	-	-	-	-	-	-	-	-	-	-	-	-	-	-	-	-	-	-	-	-	-
70	-	-	-	-	-	-	-	-	-	-	-	-	-	-	-	-	-	-	-	-	-	-	-	-	-	-	-	-	-	-	-	-	-	-	-	-	-	-	-	-	-	-	-	-	-	-	-	-	-
80	-	-	-	-	-	-	-	-	-	-	-	-	-	-	-	-	-	-	-	-	-	-	-	-	-	-	-	-	-	-	-	-	-	-	-	-	-	-	-	-	-	-	-	-	-	-	-	-	-
90	-	-	-	-	-	-	-	-	-	-	-	-	-	-	-	-	-	-	-	-	-	-	-	-	-	-	-	-	-	-	-	-	-	-	-	-	-	-	-	-	-	-	-	-	-	-	-	-	-
100	-	-	-	-	-	-	-	-	-	-	-	-	-	-	-	-	-	-	-	-	-	-	-	-	-	-	-	-	-	-	-	-	-	-	-	-	-	-	-	-	-	-	-	-	-	-	-	-	-
110	-	-	-	-	-	-	-	-	-	-	-	-	-	-	-	-	-	-	-	-	-	-	-	-	-	-	-	-	-	-	-	-	-	-	-	-	-	-	-	-	-	-	-	-	-	-	-	-	-
120	-	-	-	-	-	-	-	-	-	-	-	-	-	-	-	-	-	-	-	-	-	-	-	-	-	-	-	-	-	-	-	-	-	-	-	-	-	-	-	-	-	-	-	-	-	-	-	-	-
130	-	-	-	-	-	-	-	-	-	-	-	-	-	-	-	-	-	-	-	-	-	-	-	-	-	-	-	-	-	-	-	-	-	-	-	-	-	-	-	-	-	-	-	-	-	-	-	-	-
140	-	-	-	-	-	-	-	-	-	-	-	-	-	-	-	-	-	-	-	-	-	-	-	-	-	-	-	-	-	-	-	-	-	-	-	-	-	-	-	-	-	-	-	-	-	-	-	-	-
150	-	-	-	-	-	-	-	-	-	-	-	-	-	-	-	-	-	-	-	-	-	-	-	-	-	-	-	-	-	-	-	-	-	-	-	-	-	-	-	-	-	-	-	-	-	-	-	-	-
160	-	-	-	-	-	-	-	-	-	-	-	-	-	-	-	-	-	-	-	-	-	-	-	-	-	-	-	-	-	-	-	-	-	-	-	-	-	-	-	-	-	-	-	-	-	-	-	-	-
170	-	-	-	-	-	-	-	-	-	-	-	-	-	-	-	-	-	-	-	-	-	-	-	-	-	-	-	-	-	-	-	-	-	-	-	-	-	-	-	-	-	-	-	-	-	-	-	-	-
180	-	-	-	-	-	-	-	-	-	-	-	-	-	-	-	-	-	-	-	-	-	-	-	-	-	-	-	-	-	-	-	-	-	-	-	-	-	-	-	-	-	-	-	-	-	-	-	-	-
190	-	-	-	-	-	-	-	-	-	-	-	-	-	-	-	-	-	-	-	-	-	-	-	-	-	-	-	-	-	-	-	-	-	-	-	-	-	-	-	-	-	-	-	-	-	-	-	-	-
200	-	-	-	-	-	-	-	-	-	-	-	-	-	-	-	-	-	-	-	-	-	-	-	-	-	-	-	-	-	-	-	-	-	-	-	-	-	-	-	-	-	-	-	-	-	-	-	-	-
210	-	-	-	-	-	-	-	-	-	-	-	-	-	-	-	-	-	-	-	-	-	-	-	-	-	-	-	-	-	-	-	-	-	-	-	-	-	-	-	-	-	-	-	-	-	-	-	-	-
220	-	-	-	-	-	-	-	-	-	-	-	-	-	-	-	-	-	-	-	-	-	-	-	-	-	-	-	-	-	-	-	-	-	-	-	-	-	-	-	-	-	-	-	-	-	-	-	-	-
230	-	-	-	-	-	-	-	-	-	-	-	-	-	-	-	-	-	-	-	-	-	-	-	-	-	-	-	-	-	-	-	-	-	-	-	-	-	-	-	-	-	-	-	-	-	-	-	-	-
240	-	-	-	-	-	-	-	-	-	-	-	-	-	-	-	-	-	-	-	-	-	-	-	-	-	-	-	-	-	-	-	-	-	-	-	-	-	-	-	-	-	-	-	-	-	-	-	-	-
250	-	-	-	-	-	-	-	-	-	-	-	-	-	-	-	-	-	-	-	-	-	-	-	-	-	-	-	-	-	-	-	-	-	-	-	-	-	-	-	-	-	-	-	-	-	-	-	-	-
260	-	-	-	-	-	-	-	-	-	-	-	-	-	-	-	-	-	-	-	-	-	-	-	-	-	-	-	-	-	-	-	-	-	-	-	-	-	-	-	-	-	-	-	-	-	-	-	-	-
270	-	-	-	-	-	-	-	-	-	-	-	-	-	-	-	-	-	-	-	-	-	-	-	-	-	-	-	-	-	-	-	-	-	-	-	-	-	-	-	-	-	-	-	-	-	-	-	-	-
280	-	-	-	-	-	-	-	-	-	-	-	-	-	-	-	-	-	-	-	-	-	-	-	-	-	-	-	-	-	-	-	-	-	-	-	-	-	-	-	-	-	-	-	-	-	-	-	-	-
290	-	-	-	-	-	-	-	-	-	-	-	-	-	-	-	-	-	-	-	-	-	-	-	-	-	-	-	-	-	-	-	-	-	-	-	-	-	-	-	-	-	-	-	-	-	-	-	-	-
300	-	-	-	-	-	-	-	-	-	-	-	-	-	-	-	-	-	-	-	-	-	-	-	-	-	-	-	-	-	-	-	-	-	-	-	-	-	-	-	-	-	-	-	-	-	-	-	-	-
310	-	-	-	-	-	-	-	-	-	-	-	-	-	-	-	-	-	-	-	-	-	-	-	-	-	-	-	-	-	-	-	-	-	-	-	-	-	-	-	-	-	-	-	-	-	-	-	-	-
320	-	-	-	-	-	-	-	-	-	-	-	-	-	-	-	-	-	-	-	-	-	-	-	-	-	-	-	-	-	-	-	-	-	-	-	-	-	-	-	-	-	-	-	-	-	-	-	-	-
330	-	-	-	-	-	-	-	-	-	-	-	-	-	-	-	-	-	-	-	-	-	-	-	-	-	-	-	-	-	-	-	-	-	-	-	-	-	-	-	-	-	-	-	-	-	-	-	-	-
340	-	-	-	-	-	-	-	-	-	-	-	-	-	-	-	-	-	-	-	-	-	-	-	-	-	-	-	-	-	-	-	-	-	-	-	-	-	-	-	-	-	-	-	-	-	-	-	-	-
350	-	-	-	-	-	-	-	-	-	-	-	-	-	-	-	-	-	-	-	-	-	-	-	-	-	-	-	-	-	-	-	-	-	-	-	-	-	-	-	-	-	-	-	-	-	-	-	-	-
360	-	-	-	-	-	-	-	-	-	-	-	-	-	-	-	-	-	-	-	-	-	-	-	-	-	-	-	-	-	-	-	-	-	-	-	-	-	-	-	-	-	-	-	-	-	-	-	-	-
370	-	-	-	-	-	-	-	-	-	-	-	-	-	-	-	-	-	-	-	-	-	-	-	-	-	-	-	-	-	-	-	-	-	-	-	-	-	-	-	-	-	-	-	-	-	-	-	-	-
380	-	-	-	-	-	-	-	-	-	-	-	-	-	-	-	-	-	-	-	-	-	-	-	-	-	-	-	-	-	-	-	-	-	-	-	-	-	-	-	-	-	-	-	-	-	-	-	-	-
390	-	-	-	-	-	-	-	-	-	-	-	-	-	-	-	-	-	-	-	-	-	-	-	-	-	-	-	-	-	-	-	-	-	-	-	-	-	-	-	-	-	-	-	-	-	-	-	-	-
400	-	-	-	-	-	-	-	-	-	-	-	-	-	-	-	-	-	-	-	-	-	-	-	-	-	-	-	-	-	-	-	-	-	-	-	-	-	-	-	-	-	-	-	-	-	-	-	-	-
410	-	-	-	-	-	-	-	-	-	-	-	-	-	-	-	-	-	-	-	-	-	-	-	-	-	-	-	-	-	-	-	-	-	-	-	-	-	-	-	-	-	-	-	-	-	-	-	-	-
420	-	-	-	-	-	-	-	-	-	-	-	-	-	-	-	-	-	-	-	-	-	-	-	-	-	-	-	-	-	-	-	-	-	-	-	-	-	-	-	-	-	-	-	-	-	-	-	-	-
430	-	-	-	-	-	-	-	-	-	-	-	-	-	-	-	-	-	-	-	-	-	-	-	-	-	-	-	-	-	-	-	-	-	-	-	-	-	-	-	-	-	-	-	-	-	-	-	-	-
440	-	-	-	-	-	-	-	-	-	-	-	-	-	-	-	-	-	-	-	-	-	-	-	-	-	-	-	-	-	-	-	-	-	-	-	-	-	-	-	-	-	-	-	-	-	-	-	-	-
450	-	-	-	-	-	-	-	-	-	-	-	-	-	-	-	-	-	-	-	-	-	-	-	-	-	-	-	-	-	-	-	-	-	-	-	-	-	-	-	-	-	-	-	-	-	-	-	-	-
460	-	-	-	-	-	-	-	-	-	-	-	-	-	-	-	-	-	-	-	-	-	-	-	-	-	-	-	-	-	-	-	-	-	-	-	-	-	-	-	-	-	-	-	-	-	-	-	-	-
470	-	-	-	-	-	-	-	-	-	-	-	-	-	-	-	-	-	-	-	-	-	-	-	-	-	-	-	-	-	-	-	-	-	-	-	-	-	-	-	-	-	-	-	-	-	-	-	-	-
480	-	-	-	-	-	-	-	-	-	-	-	-	-	-	-	-	-	-	-	-	-	-	-	-	-	-	-	-	-	-	-	-	-	-	-	-	-	-	-	-	-	-	-	-	-	-	-	-	-
490	-	-	-	-	-	-	-	-	-	-	-	-	-	-	-	-	-	-	-	-	-	-	-	-	-	-	-	-	-	-	-	-	-	-	-	-	-	-	-	-	-	-	-	-	-	-	-	-	-
500	-	-	-	-	-	-	-	-	-	-	-	-	-	-	-	-	-	-	-	-	-	-	-	-	-	-	-	-	-	-	-	-	-	-	-	-	-	-	-	-	-	-	-	-	-	-	-	-	-
Genes in 3' downstream
24-PHAS Loci	24-PHAS_chr2_1	24-PHAS_chr2_2	24-PHAS_chr2_3	24-PHAS_chr2_4	24-PHAS_chr2_5	24-PHAS_chr2_6	24-PHAS_chr2_7	24-PHAS_chr3_8	24-PHAS_chr4_11	24-PHAS_chr4_12	24-PHAS_chr4_13	24-PHAS_chr5_14	24-PHAS_chr5_15	24-PHAS_chr5_16	24-PHAS_chr5_17	24-PHAS_chr5_18	24-PHAS_chr5_19	24-PHAS_chr5_20	24-PHAS_chr5_21	24-PHAS_chr6_22	24-PHAS_chr6_24	24-PHAS_chr6_25	24-PHAS_chr6_26	24-PHAS_chr6_27	24-PHAS_chr6_28	24-PHAS_chr6_29	24-PHAS_chr6_30	24-PHAS_chr6_31	24-PHAS_chr6_32	24-PHAS_chr6_33	24-PHAS_chr6_34	24-PHAS_chr6_35	24-PHAS_chr6_36	24-PHAS_chr6_37	24-PHAS_chr6_38	24-PHAS_chr6_39	24-PHAS_chr6_40	24-PHAS_chr7_41	24-PHAS_chr7_43	24-PHAS_chr7_44	24-PHAS_chr7_45	24-PHAS_chr7_46	24-PHAS_chr7_47	24-PHAS_chr7_48	24-PHAS_chr7_49	24-PHAS_chr7_50	24-PHAS_chr8_51	24-PHAS_chr8_52	24-PHAS_chr8_53
Position (10 bp window)
-500	-	-	-	-	-	-	-	-	-	-	-	-	-	-	-	-	-	-	-	-	-	-	-	-	-	-	-	-	-	-	-	-	-	-	-	-	-	-	-	-	-	-	-	-	-	-	-	-	-
-490	-	-	-	-	-	-	-	-	-	-	-	-	-	-	-	-	-	-	-	-	-	-	-	-	-	-	-	-	-	-	-	-	-	-	-	-	-	-	-	-	-	-	-	-	-	-	-	-	-
-480	-	-	-	-	-	-	-	-	-	-	-	-	-	-	-	-	-	-	-	-	-	-	-	-	-	-	-	-	-	-	-	-	-	-	-	-	-	-	-	-	-	-	-	-	-	-	-	-	-
-470	-	-	-	-	-	-	-	-	-	-	-	-	-	-	-	-	-	-	-	-	-	-	-	-	-	-	-	-	-	-	-	-	-	-	-	-	-	-	-	-	-	-	-	-	-	-	-	-	-
-460	-	-	-	-	-	-	-	-	-	-	-	-	-	-	-	-	-	-	-	-	-	-	-	-	-	-	-	-	-	-	-	-	-	-	-	-	-	-	-	-	-	-	-	-	-	-	-	-	-
-450	-	-	-	-	-	-	-	-	-	-	-	-	-	-	-	-	-	-	-	-	-	-	-	-	-	-	-	-	-	-	-	-	-	-	-	-	-	-	-	-	-	-	-	-	-	-	-	-	-
-440	-	-	-	-	-	-	-	-	-	-	-	-	-	-	-	-	-	-	-	-	-	-	-	-	-	-	-	-	-	-	-	-	-	-	-	-	-	-	-	-	-	-	-	-	-	-	-	-	-
-430	-	-	-	-	-	-	-	-	-	-	-	-	-	-	-	-	-	-	-	-	-	-	-	-	-	-	-	-	-	-	-	-	-	-	-	-	-	-	-	-	-	-	-	-	-	-	-	-	-
-420	-	-	-	-	-	-	-	-	-	-	-	-	-	-	-	-	-	-	-	-	-	-	-	-	-	-	-	-	-	-	-	-	-	-	-	-	-	-	-	-	-	-	-	-	-	-	-	-	-
-410	-	-	-	-	-	-	-	-	-	-	-	-	-	-	-	-	-	-	-	-	-	-	-	-	-	-	-	-	-	-	-	-	-	-	-	-	-	-	-	-	-	-	-	-	-	-	-	-	-
-400	-	-	-	-	-	-	-	-	-	-	-	-	-	-	-	-	-	-	-	-	-	-	-	-	-	-	-	-	-	-	-	-	-	-	-	-	-	-	-	-	-	-	-	-	-	-	-	-	-
-390	-	-	-	-	-	-	-	-	-	-	-	-	-	-	-	-	-	-	-	-	-	-	-	-	-	-	-	-	-	-	-	-	-	-	-	-	-	-	-	-	-	-	-	-	-	-	-	-	-
-380	-	-	-	-	-	-	-	-	-	-	-	-	-	-	-	-	-	-	-	-	-	-	-	-	-	-	-	-	-	-	-	-	-	-	-	-	-	-	-	-	-	-	-	-	-	-	-	-	-
-370	-	-	-	-	-	-	-	-	-	-	-	-	-	-	-	-	-	-	-	-	-	-	-	-	-	-	-	-	-	-	-	-	-	-	-	-	-	-	-	-	-	-	-	-	-	-	-	-	-
-360	-	-	-	-	-	-	-	-	-	-	-	-	-	-	-	-	-	-	-	-	-	-	-	-	-	-	-	-	-	-	-	-	-	-	-	-	-	-	-	-	-	-	-	-	-	-	-	-	-
-350	-	-	-	-	-	-	-	-	-	-	-	-	-	-	-	-	-	-	-	-	-	-	-	-	-	-	-	-	-	-	-	-	-	-	-	-	-	-	-	-	-	-	-	-	-	-	-	-	-
-340	-	-	-	-	-	-	-	-	-	-	-	-	-	-	-	-	-	-	-	-	-	-	-	-	-	-	-	-	-	-	-	-	-	-	-	-	-	-	-	-	-	-	-	-	-	-	-	-	-
-330	-	-	-	-	-	-	-	-	-	-	-	-	-	-	-	-	-	-	-	-	-	-	-	-	-	-	-	-	-	-	-	-	-	-	-	-	-	-	-	-	-	-	-	-	-	-	-	-	-
-320	-	-	-	-	-	-	-	-	-	-	-	-	-	-	-	-	-	-	-	-	-	-	-	-	-	-	-	-	-	-	-	-	-	-	-	-	-	-	-	-	-	-	-	-	-	-	-	-	-
-310	-	-	-	-	-	-	-	-	-	-	-	-	-	-	-	-	-	-	-	-	-	-	-	-	-	-	-	-	-	-	-	-	-	-	-	-	-	-	-	-	-	-	-	-	-	-	-	-	-
-300	-	-	-	-	-	-	-	-	-	-	-	-	-	-	-	-	-	-	-	-	-	-	-	-	-	-	-	-	-	-	-	-	-	-	-	-	-	-	-	-	-	-	-	-	-	-	-	-	-
-290	-	-	-	-	-	-	-	-	-	-	-	-	-	-	-	-	-	-	-	-	-	-	-	-	-	-	-	-	-	-	-	-	-	-	-	-	-	-	-	-	-	-	-	-	-	-	-	-	-
-280	-	-	-	-	-	-	-	-	-	-	-	-	-	-	-	-	-	-	-	-	-	-	-	-	-	-	-	-	-	-	-	-	-	-	-	-	-	-	-	-	-	-	-	-	-	-	-	-	-
-270	-	-	-	-	-	-	-	-	-	-	-	-	-	-	-	-	-	-	-	-	-	-	-	-	-	-	-	-	-	-	-	-	-	-	-	-	-	-	-	-	-	-	-	-	-	-	-	-	-
-260	-	-	-	-	-	-	-	-	-	-	-	-	-	-	-	-	-	-	-	-	-	-	-	-	-	-	-	-	-	-	-	-	-	-	-	-	-	-	-	-	-	-	-	-	-	-	-	-	-
-250	-	-	-	-	-	-	-	-	-	-	-	-	-	-	-	-	-	-	-	-	-	-	-	-	-	-	-	-	-	-	-	-	-	-	-	-	-	-	-	-	-	-	-	-	-	-	-	-	-
-240	-	-	-	-	-	-	-	-	-	-	-	-	-	-	-	-	-	-	-	-	-	-	-	-	-	-	-	-	-	-	-	-	-	-	-	-	-	-	-	-	-	-	-	-	-	-	-	-	-
-230	-	-	-	-	-	-	-	-	-	-	-	-	-	-	-	-	-	-	-	-	-	-	-	-	-	-	-	-	-	-	-	-	-	-	-	-	-	-	-	-	-	-	-	-	-	-	-	-	-
-220	-	-	-	-	-	-	-	-	-	-	-	-	-	-	-	-	-	-	-	-	-	-	-	-	-	-	-	-	-	-	-	-	-	-	-	-	-	-	-	-	-	-	-	-	-	-	-	-	-
-210	-	-	-	-	-	-	-	-	-	-	-	-	-	-	-	-	-	-	-	-	-	-	-	-	-	-	-	-	-	-	-	-	-	-	-	-	-	-	-	-	-	-	-	-	-	-	-	-	-
-200	-	-	-	-	-	-	-	-	-	-	-	-	-	-	-	-	-	-	-	-	-	-	-	-	-	-	-	-	-	-	-	-	-	-	-	-	-	-	-	-	-	-	-	-	-	-	-	-	-
-190	-	-	-	-	-	-	-	-	-	-	-	-	-	-	-	-	-	-	-	-	-	-	-	-	-	-	-	-	-	-	-	-	-	-	-	-	-	-	-	-	-	-	-	-	-	-	-	-	-
-180	-	-	-	-	-	-	-	-	-	-	-	-	-	-	-	-	-	-	-	-	-	-	-	-	-	-	-	-	-	-	-	-	-	-	-	-	-	-	-	-	-	-	-	-	-	-	-	-	-
-170	-	-	-	-	-	-	-	-	-	-	-	-	-	-	-	-	-	-	-	-	-	-	-	-	-	-	-	-	-	-	-	-	-	-	-	-	-	-	-	-	-	-	-	-	-	-	-	-	-
-160	-	-	-	-	-	-	-	-	-	-	-	-	-	-	-	-	-	-	-	-	-	-	-	-	-	-	-	-	-	-	-	-	-	-	-	-	-	-	-	-	-	-	-	-	-	-	-	-	-
-150	-	-	-	-	-	-	-	-	-	-	-	-	-	-	-	-	-	-	-	-	-	-	-	-	-	-	-	-	-	-	-	-	-	-	-	-	-	-	-	-	-	-	-	-	-	-	-	-	-
-140	-	-	-	-	-	-	-	-	-	-	-	-	-	-	-	-	-	-	-	-	-	-	-	-	-	-	-	-	-	-	-	-	-	-	-	-	-	-	-	-	-	-	-	-	-	-	-	-	-
-130	-	-	-	-	-	-	-	-	-	-	-	-	-	-	-	-	-	-	-	-	-	-	-	-	-	-	-	-	-	-	-	-	-	-	-	-	-	-	-	-	-	-	-	-	-	-	-	-	-
-120	-	-	-	-	-	-	-	-	-	-	-	-	-	-	-	-	-	-	-	-	-	-	-	-	-	-	-	-	-	-	-	-	-	-	-	-	-	-	-	-	-	-	-	-	-	-	-	-	-
-110	-	-	-	-	-	-	-	-	-	-	-	-	-	-	-	-	-	-	-	-	-	-	-	-	-	-	-	-	-	-	-	-	-	-	-	-	-	-	-	-	-	-	-	-	-	-	-	-	-
-100	-	-	-	-	-	-	-	-	-	-	-	-	-	-	-	-	-	-	-	-	-	-	-	-	-	-	-	-	-	-	-	-	-	-	-	-	-	-	-	-	-	-	-	-	-	-	-	-	-
-90	-	-	-	-	-	-	-	-	-	-	-	-	-	-	-	-	-	-	-	-	-	-	-	-	-	-	-	-	-	-	-	-	-	-	-	-	-	-	-	-	-	-	-	-	-	-	-	-	-
-80	-	-	-	-	-	-	-	-	-	-	-	-	-	-	-	-	-	-	-	-	-	-	-	-	-	-	-	-	-	-	-	-	-	-	-	-	-	-	-	-	-	-	-	-	-	-	-	-	-
-70	-	-	-	-	-	-	-	-	-	-	-	-	-	-	-	-	-	-	-	-	-	-	-	-	-	-	-	-	-	-	-	-	-	-	-	-	-	-	-	-	-	-	-	-	-	-	-	-	-
-60	-	-	-	-	-	-	-	-	-	-	-	-	-	-	-	-	-	-	-	-	-	-	-	-	-	-	-	-	-	-	-	-	-	-	-	-	-	-	-	-	-	-	-	-	-	-	-	-	-
-50	-	-	-	-	-	-	-	-	-	-	-	-	-	-	-	-	-	-	-	-	-	-	-	-	-	-	-	-	-	-	-	-	-	-	-	-	-	-	-	-	-	-	-	-	-	-	-	-	-
-40	-	-	-	-	-	-	-	-	-	-	-	-	-	-	-	-	-	-	-	-	-	-	-	-	-	-	-	-	-	-	-	-	-	-	-	-	-	-	-	-	-	-	-	-	-	-	-	-	-
-30	-	-	-	-	-	-	-	-	-	-	-	-	-	-	-	-	-	-	-	-	-	-	-	-	-	-	-	-	-	-	-	-	-	-	-	-	-	-	-	-	-	-	-	-	-	-	-	-	-
-20	-	-	-	-	-	-	-	-	-	-	-	-	-	-	-	-	-	-	-	-	-	-	-	-	-	-	-	-	-	-	-	-	-	-	-	-	-	-	-	-	-	-	-	-	-	-	-	-	-
-10	-	-	-	-	-	-	-	-	-	-	-	-	-	-	-	-	-	-	-	-	-	-	-	-	-	-	-	-	-	-	-	-	-	-	-	-	-	-	-	-	-	-	-	-	-	-	-	-	-
0	-	-	-	-	-	-	+	-	-	-	-	-	-	-	-	-	-	-	-	-	-	-	-	-	-	-	-	-	-	-	-	-	-	-	+	-	-	-	-	-	-	-	-	-	-	-	-	-	-
10	-	-	-	-	-	-	+	-	-	-	-	-	-	-	-	-	-	-	-	-	-	-	-	-	-	-	-	-	-	-	-	-	-	-	+	-	-	-	-	-	-	-	-	-	-	-	-	-	-
20	-	-	-	-	-	-	+	-	-	-	-	-	-	-	-	-	-	-	-	-	-	-	-	-	-	-	-	-	-	-	-	-	-	-	+	-	-	-	-	-	-	-	-	-	-	-	-	-	-
30	-	-	-	-	-	-	+	-	-	-	-	-	-	-	-	-	-	-	-	-	-	-	-	-	-	-	-	-	-	-	-	-	-	-	+	-	-	-	-	-	-	-	-	-	-	-	-	-	-
40	-	-	-	-	-	-	+	-	-	-	-	-	-	-	-	-	-	-	-	-	-	-	-	-	-	-	-	-	-	-	-	-	-	-	+	-	-	-	-	-	-	-	-	-	-	-	-	-	-
50	-	-	-	-	-	-	+	-	-	-	-	-	-	-	-	-	-	-	-	-	-	-	-	-	-	-	-	-	-	-	-	-	-	-	+	-	-	-	-	-	-	-	-	-	-	-	-	-	-
60	-	-	-	-	-	-	+	-	-	-	-	-	-	-	-	-	-	-	-	-	-	-	-	-	-	-	-	-	-	-	-	-	-	-	+	-	-	-	-	-	-	-	-	-	-	-	-	-	-
70	-	-	-	-	-	-	+	-	-	-	-	-	-	-	-	-	-	-	+	-	-	-	-	-	-	-	-	-	-	-	-	-	-	-	+	-	-	-	-	-	-	-	-	-	-	-	-	-	-
80	-	-	-	-	-	-	+	-	-	-	-	-	-	-	-	-	-	-	+	-	-	-	-	-	-	-	-	-	-	-	-	-	-	-	+	-	-	-	-	-	-	-	-	-	-	-	-	-	-
90	-	-	-	-	-	-	+	-	-	-	-	-	-	-	-	-	-	-	+	-	-	-	-	-	-	-	-	-	-	-	-	-	-	-	+	-	-	-	-	-	-	-	-	-	-	-	-	-	-
100	-	-	-	-	-	-	+	-	-	-	-	-	-	-	-	-	-	-	+	-	-	-	-	-	-	-	-	-	-	-	-	-	-	-	+	-	-	-	-	-	-	-	-	-	-	-	-	-	-
110	-	-	-	-	-	-	+	-	-	-	-	-	-	-	-	-	-	-	+	-	-	-	-	-	-	-	-	-	-	-	-	-	-	-	+	-	-	-	-	-	-	-	-	-	-	-	-	-	-
120	-	-	-	-	-	-	+	-	-	-	-	-	-	-	-	-	-	-	+	-	-	-	-	-	-	-	-	-	-	-	-	-	-	-	+	-	-	-	-	-	-	-	-	-	-	-	-	-	-
130	-	-	-	-	-	-	+	-	-	-	-	-	-	-	-	-	-	+	+	-	-	-	-	-	-	-	-	-	-	-	-	-	-	-	+	-	-	-	-	-	-	-	-	-	-	-	-	-	-
140	-	-	-	-	-	-	+	-	-	-	-	-	-	-	-	-	-	+	+	-	-	-	-	-	-	-	-	-	-	-	-	-	-	-	+	-	-	-	-	-	-	-	-	-	-	-	-	-	-
150	-	-	-	-	-	-	+	-	-	-	-	-	-	-	-	-	-	+	+	-	-	-	-	-	-	-	-	-	-	-	-	-	-	-	+	-	-	-	-	-	-	-	-	-	-	-	-	-	-
160	-	-	-	-	-	-	+	-	-	-	-	-	-	-	-	-	-	+	+	-	-	-	-	-	-	-	-	-	-	-	-	-	-	-	+	-	-	-	-	-	-	-	-	-	-	-	-	-	-
170	-	-	-	-	-	-	+	-	-	-	-	-	-	-	-	-	-	+	+	-	-	-	-	-	-	-	-	-	-	-	-	-	-	-	+	-	-	-	-	-	-	-	-	-	-	-	-	-	-
180	-	-	-	-	-	-	+	-	-	-	-	-	-	-	-	-	-	+	+	-	-	-	-	-	-	-	-	-	-	-	-	-	-	-	+	-	-	-	-	-	-	-	-	-	-	-	-	-	-
190	-	-	-	-	-	-	+	-	-	-	-	-	-	-	-	-	-	+	+	-	-	-	-	-	-	-	-	-	-	-	-	-	-	-	+	-	-	-	-	-	-	-	-	-	-	-	-	-	-
200	-	-	-	-	-	-	+	-	-	-	-	-	-	-	-	-	-	+	+	-	-	-	-	-	-	-	-	-	-	-	-	-	-	-	+	-	-	-	-	-	-	-	-	-	-	-	-	-	-
210	-	-	-	-	-	-	+	-	-	-	-	-	-	-	-	-	-	+	+	-	-	-	-	-	-	-	-	-	-	-	-	-	-	-	+	-	-	-	-	-	-	-	-	-	-	-	-	-	-
220	-	-	-	-	-	-	+	-	-	-	-	-	-	-	-	-	-	+	+	-	-	-	-	-	-	-	-	-	-	-	-	-	-	-	+	-	-	-	-	-	-	-	-	-	-	-	-	-	-
230	-	-	-	-	-	-	+	-	-	-	-	-	-	-	-	-	-	+	+	-	-	-	-	-	-	-	-	-	-	-	-	-	-	-	+	-	-	-	-	-	-	-	-	-	-	-	-	-	-
240	-	-	-	-	-	-	+	-	-	-	-	-	-	-	-	-	-	+	+	-	-	-	-	-	-	-	-	-	-	-	-	-	-	-	+	-	-	-	-	-	-	-	-	-	-	-	-	-	-
250	-	-	-	-	-	-	+	-	-	-	-	-	-	-	-	-	-	+	+	-	-	-	-	-	-	-	-	-	-	-	-	-	-	-	+	-	-	-	-	-	-	-	-	-	-	-	-	-	-
260	-	-	-	-	-	-	+	-	-	-	-	-	-	-	-	-	-	+	+	-	-	-	-	-	-	-	-	-	-	-	-	-	-	-	+	-	-	-	-	-	-	-	-	-	-	-	-	-	-
270	-	-	-	-	-	-	+	-	-	-	-	-	-	-	-	-	-	+	+	-	-	-	-	-	-	-	-	-	-	-	-	-	-	-	+	-	-	-	-	-	-	+	-	-	-	-	-	-	-
280	-	-	-	-	-	-	+	-	-	-	-	-	-	-	-	-	-	+	+	-	-	-	-	-	-	-	-	-	-	-	-	-	-	-	+	-	-	-	-	-	-	+	-	-	-	-	-	-	-
290	-	-	-	-	-	-	+	-	-	-	-	-	-	-	-	-	-	+	+	-	-	-	-	-	-	-	-	-	-	-	-	-	-	-	+	-	-	-	-	-	-	+	-	-	-	-	-	-	-
300	-	-	-	-	-	-	+	-	-	-	-	-	-	-	-	-	-	+	+	-	-	-	-	-	-	-	-	-	-	-	-	-	-	-	+	-	-	-	-	-	-	+	-	-	-	-	-	-	-
310	-	-	-	-	-	-	+	-	-	-	-	-	-	-	-	-	-	+	+	-	-	-	-	-	-	-	-	-	-	-	-	-	-	-	+	-	-	-	-	-	-	+	-	-	-	-	-	-	-
320	-	-	-	-	-	-	+	-	-	-	-	-	-	-	-	-	-	+	+	-	-	-	-	-	-	-	-	-	-	-	-	-	-	-	+	-	-	-	-	-	-	+	-	-	-	-	-	-	-
330	-	-	-	-	-	-	+	-	-	-	-	-	-	-	-	-	-	+	+	-	-	-	-	-	-	-	-	-	-	-	-	-	-	-	+	-	-	-	-	-	-	+	-	-	-	-	-	-	-
340	-	-	-	-	-	-	+	-	-	-	-	-	-	-	-	-	-	+	+	-	-	-	-	-	-	-	-	-	-	-	-	-	-	-	+	-	-	-	-	-	-	+	-	-	-	-	-	-	-
350	-	-	-	-	-	-	+	-	-	-	-	-	-	-	+	-	-	+	+	-	-	-	-	-	-	-	-	-	-	-	-	-	-	-	+	-	-	-	-	-	-	+	-	-	-	-	-	-	-
360	-	-	-	-	-	-	+	-	-	-	-	-	-	-	+	-	-	+	+	-	-	-	-	-	-	-	-	-	-	-	-	-	-	-	+	-	-	-	-	-	-	+	-	-	-	-	-	-	-
370	-	-	-	-	-	-	+	-	-	-	-	-	-	-	+	-	-	+	+	-	-	-	-	-	-	-	-	-	-	-	-	-	-	-	+	-	-	-	-	-	-	+	-	-	-	-	-	-	-
380	-	-	-	-	-	-	+	-	-	-	-	-	-	-	+	-	-	+	+	-	-	-	-	-	-	-	-	-	-	-	-	-	-	-	+	-	-	-	-	-	-	+	-	-	-	-	-	-	-
390	-	-	-	-	-	-	+	-	-	-	-	-	-	-	+	-	-	+	+	-	-	-	-	-	+	-	-	-	-	-	-	-	-	-	+	-	-	-	-	-	-	+	-	-	-	-	-	-	-
400	-	-	-	-	-	-	+	-	-	-	-	-	-	-	+	-	-	+	+	-	-	-	-	-	+	-	-	-	-	-	-	-	-	-	+	-	-	-	-	-	-	+	-	-	-	-	-	-	-
410	-	-	-	-	-	-	+	-	-	-	-	-	-	-	+	-	-	+	+	-	-	-	-	-	+	-	-	-	-	-	-	-	-	-	+	-	-	-	-	-	-	+	-	-	-	-	-	-	-
420	-	-	-	-	-	-	+	-	-	-	-	-	-	-	+	-	-	+	+	-	-	-	-	-	+	-	-	-	-	-	-	-	-	-	+	-	-	-	-	-	-	+	-	-	-	-	-	-	-
430	-	-	-	-	-	-	+	-	-	-	-	-	-	-	+	-	-	+	+	-	-	-	-	-	+	-	-	-	-	-	-	-	-	-	+	-	-	-	-	-	-	+	-	-	-	-	-	-	-
440	-	-	-	-	-	-	+	-	-	-	-	-	-	-	+	-	-	+	+	-	-	-	-	-	+	-	-	-	-	-	-	-	-	-	+	-	-	-	-	-	-	+	-	-	-	-	-	-	-
450	-	-	-	-	-	-	+	-	-	-	-	-	-	-	+	-	-	+	+	-	-	-	-	-	+	-	-	-	-	-	-	-	-	-	+	-	-	-	-	-	-	+	-	-	-	-	-	-	-
460	-	-	-	-	-	-	+	-	-	-	-	-	-	-	+	-	-	+	+	-	-	-	-	-	+	-	-	-	-	-	-	-	-	-	+	-	-	-	-	-	-	+	-	-	-	-	-	-	-
470	-	-	-	-	-	-	+	-	-	-	-	-	-	-	+	-	-	+	+	-	-	-	-	-	+	-	-	-	-	-	-	-	-	-	+	-	-	-	-	-	-	+	-	-	-	-	-	-	-
480	-	-	-	-	-	-	+	-	-	-	-	-	-	-	+	-	-	+	+	-	-	-	-	-	+	-	-	-	-	-	-	-	-	-	+	-	-	-	-	-	-	+	-	-	-	-	-	-	-
490	-	-	-	-	-	-	+	-	-	-	-	-	-	-	+	-	-	+	+	-	-	-	-	-	+	-	-	-	-	-	-	-	-	-	+	-	-	-	-	-	-	+	-	-	-	-	-	-	-
500	-	-	-	-	-	-	+	-	-	-	-	-	-	-	+	-	-	+	+	-	-	-	-	-	+	-	-	-	-	-	-	-	-	-	+	-	-	-	-	-	-	+	+	-	-	-	-	-	-
510	-	-	-	-	-	-	+	-	-	-	-	-	-	-	+	-	-	+	+	-	-	-	-	-	+	-	-	-	-	-	-	-	-	-	+	-	-	-	-	-	-	+	+	-	-	-	-	-	-
520	-	-	-	-	-	-	+	-	-	-	-	-	-	-	+	-	-	+	+	-	-	-	-	-	+	-	-	-	-	-	-	-	-	-	+	-	-	-	-	-	-	+	+	-	-	-	-	-	-
530	-	-	-	-	-	-	+	-	-	-	-	-	-	-	+	-	-	+	+	-	-	-	-	-	+	-	-	-	-	-	-	-	-	-	+	-	-	-	-	-	-	+	+	+	-	-	-	-	-
540	-	-	-	-	-	-	+	-	-	-	-	-	-	-	+	-	-	+	+	-	-	-	-	-	+	-	-	-	-	-	-	-	-	-	+	-	-	-	-	-	-	+	+	+	-	-	-	-	-
550	-	-	-	-	-	-	+	-	-	-	-	-	-	-	+	-	-	+	+	-	-	-	-	-	+	-	-	-	-	-	-	-	-	-	+	-	-	-	-	-	-	+	+	+	-	-	-	-	-
560	-	-	-	-	-	-	+	-	-	-	-	-	-	-	+	-	-	+	+	-	-	-	-	-	+	-	-	-	-	-	-	-	-	-	+	-	-	-	-	-	-	+	+	+	-	-	-	-	-
570	-	-	-	-	-	-	+	-	-	-	-	-	-	-	+	-	-	+	+	-	-	-	-	-	+	-	-	-	-	-	-	-	-	-	+	-	-	-	-	-	-	+	+	+	-	-	-	-	-
580	-	-	-	-	-	-	+	-	-	-	-	-	-	-	+	-	-	+	-	-	-	-	-	-	+	-	-	-	-	-	-	-	-	-	+	-	-	-	-	-	-	+	+	+	-	-	-	-	-
590	-	-	-	-	-	-	+	-	-	-	-	-	-	-	+	-	-	+	-	-	-	-	-	-	+	-	-	-	-	-	-	-	-	-	+	-	-	-	-	-	-	+	+	+	-	-	-	-	-
600	-	-	-	-	-	-	+	-	-	-	-	-	-	-	+	-	-	+	-	-	-	-	-	-	+	-	-	-	-	-	-	-	-	-	+	-	-	-	-	-	-	+	+	+	-	-	-	-	-
610	-	-	-	-	-	-	+	-	-	-	-	-	-	-	+	-	-	+	-	-	-	-	-	-	+	-	-	-	-	-	-	-	-	-	+	+	-	-	-	-	-	+	+	+	-	-	-	-	-
620	-	-	-	-	-	-	+	-	-	-	-	-	-	-	+	-	-	+	-	-	-	-	-	-	+	-	-	-	-	-	-	-	-	-	+	+	-	-	-	-	-	+	+	+	-	-	-	-	-
630	-	-	-	-	-	-	+	-	-	-	-	-	-	-	+	-	-	+	-	-	-	-	-	-	+	-	-	-	-	-	-	-	-	-	+	+	-	-	-	-	-	+	+	+	-	-	-	-	-
640	-	-	-	-	-	-	+	-	-	-	-	-	-	-	+	-	-	+	-	-	-	-	-	-	+	-	-	-	-	-	-	-	-	-	+	+	-	-	-	-	-	+	+	+	-	-	-	-	-
650	-	-	-	-	-	-	+	-	-	-	-	-	-	-	+	-	-	+	-	-	-	-	-	-	+	-	-	-	-	-	-	-	-	-	+	+	-	-	-	-	-	+	+	+	-	-	-	-	-
660	-	-	-	-	-	-	+	-	-	-	-	-	-	-	+	-	-	+	-	-	-	-	-	-	+	-	-	-	-	-	-	-	-	-	+	+	-	-	-	-	-	+	+	+	-	-	-	-	-
670	-	-	-	-	-	-	+	-	-	-	-	-	-	-	+	-	-	+	-	-	-	-	-	-	+	-	-	-	-	-	-	-	-	-	+	+	-	-	-	-	-	+	+	+	-	-	-	-	-
680	-	-	-	-	-	-	+	-	-	-	-	-	-	-	+	-	-	+	-	-	-	-	-	-	+	-	-	-	-	-	-	-	-	-	+	+	-	-	-	-	-	+	+	+	-	-	-	-	-
690	-	-	-	-	-	-	+	-	-	-	-	-	-	-	+	-	-	+	-	-	-	-	-	-	+	-	-	-	-	-	-	-	-	-	+	+	-	-	-	-	-	+	+	+	-	-	-	-	-
700	-	-	-	-	-	-	+	-	-	-	-	-	-	-	+	-	-	+	-	-	-	-	-	-	+	-	-	-	-	-	-	-	-	-	+	+	-	-	-	-	-	+	+	+	-	-	-	-	-
710	-	-	-	-	-	-	+	-	-	-	-	-	-	-	+	-	-	+	-	-	-	-	-	-	+	-	-	-	-	-	-	-	-	-	+	+	-	-	-	-	-	+	+	+	-	-	-	-	-
720	-	-	-	-	-	-	+	-	-	-	-	-	-	-	+	-	-	+	-	-	-	-	-	-	+	-	-	-	-	-	-	-	-	-	+	+	-	-	-	-	-	+	+	+	-	-	-	-	-
730	-	-	-	-	-	-	+	-	-	-	-	-	-	-	+	-	-	+	-	-	-	-	-	-	+	-	-	-	-	-	-	-	-	-	+	+	-	-	-	-	-	+	+	+	-	-	-	-	-
740	-	-	-	-	-	-	+	-	-	-	-	-	-	-	+	-	-	+	-	-	-	-	-	-	+	-	-	-	-	+	-	-	-	-	+	+	-	-	-	-	-	+	+	+	-	-	-	-	-
750	-	-	-	-	-	-	+	-	-	-	-	-	-	-	+	-	-	+	-	-	-	-	-	-	+	-	-	-	-	+	-	-	-	-	+	+	-	-	-	-	-	+	+	+	-	-	-	-	-
760	-	-	-	-	-	-	+	-	-	-	-	-	-	-	+	-	-	+	-	-	-	-	-	-	+	-	-	-	-	+	-	-	-	-	+	+	-	-	-	-	-	+	+	+	-	-	-	-	-
770	-	-	-	-	-	-	+	-	-	-	-	-	-	-	+	-	-	+	-	-	-	-	-	-	+	-	-	-	-	+	-	-	-	-	+	+	-	-	-	-	-	+	+	+	-	-	-	-	-
780	-	-	-	-	-	-	+	-	-	-	-	-	-	-	+	-	-	+	-	-	-	-	-	-	+	-	-	-	-	+	-	-	-	-	+	+	-	-	-	-	-	+	+	+	-	-	-	-	-
790	-	-	-	-	-	-	+	-	-	-	-	-	-	-	+	-	-	+	-	-	-	-	-	-	+	-	-	-	-	+	-	-	-	-	-	+	-	-	-	-	-	+	+	+	-	-	-	-	-
800	-	-	-	-	-	-	+	-	-	-	-	-	-	-	+	-	-	+	-	-	-	-	-	-	+	-	-	-	-	+	-	-	-	-	-	+	-	-	-	-	-	+	+	+	-	-	-	-	-
810	-	-	-	-	-	-	+	-	-	-	-	-	-	-	+	-	-	+	-	-	-	-	-	-	+	-	-	-	-	+	-	-	-	-	-	+	-	-	-	-	-	+	+	+	-	-	-	-	-
820	-	-	-	-	-	-	+	-	-	-	-	-	-	-	+	-	-	+	-	-	-	-	-	-	+	-	-	-	-	+	-	-	-	-	-	+	-	-	-	-	-	+	+	+	-	-	-	-	-
830	-	-	-	-	-	-	+	-	-	-	-	-	-	-	+	-	-	+	-	-	-	-	-	-	+	-	-	-	-	+	-	-	-	-	-	+	-	-	-	-	-	+	+	+	-	-	-	-	-
840	-	-	-	-	-	-	+	-	-	-	-	-	-	-	+	-	-	+	-	-	-	-	-	-	+	-	-	-	-	+	-	-	-	-	-	+	-	-	-	-	-	+	+	+	-	-	-	-	-
850	-	-	-	-	-	-	+	-	-	-	-	-	-	-	+	-	-	+	-	-	-	-	-	-	+	-	-	-	-	+	-	-	-	-	-	+	-	-	-	-	-	+	+	+	-	-	-	-	-
860	-	-	-	-	-	-	+	-	-	-	-	-	-	-	+	-	-	+	-	-	-	-	-	-	+	-	-	-	-	+	-	-	-	-	-	+	-	-	-	-	-	+	+	+	-	-	-	-	-
870	-	-	-	-	-	-	+	-	-	-	-	-	-	-	+	-	-	+	-	-	-	-	-	-	+	-	-	-	-	+	-	-	-	-	-	+	-	-	-	-	-	+	+	+	-	-	-	-	-
880	-	-	-	-	-	-	+	-	-	-	-	-	-	-	+	-	-	+	-	-	-	-	-	-	+	-	-	-	-	+	-	-	-	-	-	+	-	-	-	-	-	+	+	+	-	-	-	-	-
890	-	-	-	-	-	-	+	-	-	-	-	-	-	-	+	-	-	+	-	-	-	-	-	-	+	-	-	-	-	+	-	-	-	-	-	+	-	-	-	-	-	+	+	+	-	-	-	-	-
900	-	-	-	-	-	-	+	-	-	-	-	-	-	-	+	-	-	+	-	-	-	-	-	-	+	-	-	-	-	+	-	-	-	-	-	+	-	-	-	-	-	+	+	+	-	-	-	-	-
910	-	-	-	-	-	-	+	-	-	-	-	-	-	-	+	-	-	+	-	-	-	-	-	-	+	-	-	-	-	+	-	+	-	-	-	+	-	-	-	-	-	+	+	+	-	-	-	-	-
920	-	-	-	-	-	+	+	-	-	-	-	-	-	-	+	-	-	+	-	-	-	-	-	-	+	-	-	-	-	+	-	+	-	-	-	+	-	-	-	-	-	+	+	+	-	-	-	-	-
930	-	-	-	-	-	+	+	-	-	-	-	-	-	-	+	-	-	+	-	-	-	-	-	-	+	-	-	-	-	+	-	+	-	-	-	+	-	-	-	-	-	+	+	+	-	-	-	-	-
940	-	-	-	-	-	+	+	-	-	-	-	-	-	-	+	-	-	+	-	-	-	-	-	-	+	-	-	-	-	+	-	+	-	-	-	+	-	-	-	-	-	+	+	+	-	-	-	-	-
950	-	-	-	-	-	+	+	-	-	-	-	-	-	-	+	-	-	+	-	-	-	+	-	-	+	-	-	-	-	+	-	+	-	-	-	+	-	-	-	-	-	+	+	+	-	-	-	-	-
960	-	-	-	-	-	+	+	-	-	-	-	-	-	-	+	-	-	+	-	-	-	+	-	-	+	-	-	-	-	+	-	+	-	-	-	+	-	-	-	-	-	+	+	+	-	-	-	-	-
970	-	-	-	-	-	+	+	-	-	-	-	-	-	-	+	-	-	+	-	-	-	+	-	-	+	-	-	-	-	+	-	+	-	-	-	+	-	-	-	-	-	+	+	+	-	-	-	-	-
980	-	-	-	-	-	+	-	-	-	-	-	-	-	-	+	-	-	+	-	-	-	+	-	-	+	-	-	-	-	+	-	+	-	-	-	+	-	-	-	-	-	+	+	+	-	-	-	-	-
990	-	-	-	-	-	+	-	-	-	-	-	-	-	-	+	-	-	+	-	-	-	+	-	-	+	-	-	-	-	+	-	+	-	-	-	+	-	-	-	-	-	+	+	+	-	-	-	-	-
1000	-	-	-	-	-	+	-	-	-	-	-	-	-	-	+	-	-	+	-	-	-	+	-	-	+	-	-	-	-	+	-	+	-	-	-	+	-	-	-	-	-	+	+	+	-	-	-	-	-
1010	-	-	-	-	-	+	-	-	-	-	-	-	-	-	+	-	-	+	-	-	-	+	-	-	+	-	-	-	-	+	-	+	-	-	-	+	-	-	-	-	-	+	+	+	-	-	-	-	-
1020	-	-	-	-	-	+	-	-	-	-	-	-	-	-	+	-	-	+	-	-	-	+	-	-	+	-	-	-	-	+	-	+	-	-	-	+	-	-	-	-	-	+	+	+	-	-	-	-	-
1030	-	-	-	-	-	+	-	-	-	-	-	-	-	-	+	-	-	+	-	-	-	+	-	-	+	-	-	-	-	+	-	+	-	-	-	+	-	-	-	-	-	+	+	+	-	-	-	-	-
1040	-	-	-	-	-	+	-	-	-	-	-	-	-	-	+	-	-	+	-	-	-	+	-	-	+	-	-	-	-	+	-	+	-	-	-	+	-	-	-	-	-	+	+	+	-	-	-	-	-
1050	-	-	-	-	-	+	-	-	-	-	-	-	-	-	+	-	-	+	-	-	-	+	-	-	+	-	-	-	-	+	-	+	-	-	-	+	-	-	-	-	-	+	+	+	-	-	-	-	-
1060	-	-	-	-	-	+	-	-	-	-	-	-	-	-	+	-	-	+	-	-	-	+	-	-	+	-	-	-	-	+	-	+	-	-	-	+	-	-	-	-	-	+	+	+	-	-	-	-	-
1070	-	-	-	-	-	+	-	-	-	-	-	-	-	-	+	-	-	+	-	-	-	+	-	-	+	-	-	-	-	+	-	+	-	-	-	+	-	-	-	-	-	+	+	+	-	-	-	-	-
1080	-	-	-	-	-	+	-	-	-	-	-	-	-	-	+	-	-	+	-	-	-	+	-	-	+	-	-	-	-	+	-	+	-	-	-	+	-	-	-	-	-	+	+	+	-	-	-	-	-
1090	-	-	-	-	-	+	-	-	-	-	-	-	-	-	+	-	-	+	-	-	-	+	-	-	+	-	-	-	-	+	-	+	-	-	-	+	-	-	-	-	-	+	+	+	-	-	-	-	-
1100	-	-	-	-	-	+	-	+	-	-	-	-	-	-	+	-	-	+	-	-	-	+	-	-	+	-	-	-	-	+	-	+	-	-	-	+	-	-	-	-	-	+	+	+	-	-	-	-	-
1110	-	-	-	-	-	+	-	+	-	-	-	-	-	-	+	-	-	+	-	-	-	+	-	-	+	-	-	-	-	+	-	+	-	-	-	+	-	-	-	-	-	+	+	+	-	-	-	-	-
1120	-	-	-	-	-	+	-	+	-	-	-	-	-	-	+	-	-	+	-	-	-	+	-	-	+	-	-	-	-	+	-	+	-	-	-	+	-	-	-	-	-	+	+	+	-	-	-	-	-
1130	-	-	-	-	-	+	-	+	-	-	-	-	-	-	+	-	-	+	-	-	-	+	-	-	+	-	-	-	-	+	-	+	-	-	-	+	-	-	-	-	-	+	+	+	-	-	-	-	-
1140	-	-	-	-	-	+	-	+	-	-	-	-	-	-	+	-	-	+	-	-	-	+	-	-	+	-	-	-	-	+	-	+	-	-	-	+	-	-	-	-	-	+	+	+	-	-	-	-	-
1150	-	-	-	-	-	+	-	+	-	-	-	-	-	-	+	-	-	+	-	-	-	+	-	-	+	-	-	-	-	+	-	+	-	-	-	+	-	-	-	-	-	+	+	+	-	-	-	-	-
1160	-	-	-	-	-	+	-	+	-	-	-	-	-	-	+	-	-	+	-	-	-	+	-	-	+	-	-	-	-	+	-	+	-	-	-	+	-	-	-	-	-	+	+	+	-	-	-	-	-
1170	-	-	-	-	-	+	-	+	-	-	-	-	-	-	+	-	-	+	-	-	-	+	-	-	+	-	-	-	-	+	-	+	-	-	-	+	-	-	-	-	-	+	+	+	-	-	-	-	-
1180	-	-	-	-	-	+	-	+	-	-	-	-	-	-	+	-	-	+	-	-	-	+	-	-	+	-	-	-	-	+	-	+	-	-	-	+	-	-	-	-	-	+	+	+	-	-	-	-	-
1190	-	-	-	-	-	+	-	+	-	-	-	-	-	-	+	-	-	+	-	-	-	+	-	-	+	-	-	-	-	+	-	+	-	-	-	+	-	-	-	-	-	+	+	+	-	-	-	-	-
1200	-	-	-	-	-	+	-	+	-	-	-	-	-	-	+	-	-	+	-	-	-	+	-	-	+	-	-	-	-	+	-	+	-	-	-	+	-	-	-	-	-	+	+	+	-	-	-	-	-
1210	-	-	-	-	-	+	-	+	-	-	-	-	-	-	+	-	-	+	-	-	-	+	-	-	+	-	-	-	-	-	-	+	-	-	-	+	-	-	-	-	-	+	+	+	-	-	-	-	-
1220	-	-	-	-	-	+	-	+	-	-	-	-	-	-	+	-	-	+	-	-	-	+	-	-	+	-	-	-	-	-	-	+	-	-	-	+	-	-	-	-	-	+	+	+	-	-	-	-	-
1230	-	-	-	-	-	+	-	+	-	-	-	-	-	-	+	-	-	+	-	-	-	+	-	-	+	-	-	-	-	-	-	+	-	-	-	+	-	-	-	-	-	+	+	+	-	-	-	-	-
1240	-	-	-	-	-	+	-	+	-	-	-	-	-	-	+	-	-	+	-	-	-	+	-	-	+	-	-	-	-	-	-	+	-	-	-	+	-	-	-	-	-	+	+	+	-	-	-	-	-
1250	-	-	-	-	-	+	-	+	-	-	-	-	-	-	-	-	-	+	-	-	-	+	-	-	+	-	-	-	-	-	-	+	-	-	-	+	-	-	-	-	-	+	+	+	-	-	-	-	-
1260	-	-	-	-	-	+	-	+	-	-	-	-	-	-	-	-	-	+	-	-	-	+	-	-	+	-	-	-	-	-	-	+	-	-	-	+	-	-	-	-	-	+	+	+	-	-	-	-	-
1270	-	-	-	-	-	+	-	+	-	-	-	-	-	-	-	-	-	+	-	-	-	+	-	-	+	-	-	-	-	-	-	+	-	-	-	+	-	-	-	-	-	+	+	+	-	-	-	-	-
1280	-	-	-	-	-	+	-	+	-	-	-	-	-	-	-	-	-	+	-	-	-	+	-	-	+	-	-	-	-	-	-	+	-	-	-	+	-	-	-	-	-	+	+	+	-	-	-	-	-
1290	-	-	-	-	-	+	-	+	-	-	-	-	-	-	-	-	-	+	-	-	-	+	-	-	+	-	-	-	-	-	-	+	-	-	-	+	-	-	-	-	-	+	+	+	-	-	-	-	-
1300	-	-	-	-	-	+	-	+	-	-	-	-	-	-	-	-	-	+	-	-	-	+	-	-	+	-	-	-	-	-	-	+	-	-	-	+	-	-	-	-	-	+	+	+	-	-	-	-	-
1310	-	-	-	-	-	+	-	+	-	-	-	-	-	-	-	-	-	+	-	-	-	+	-	-	+	-	-	-	-	-	-	+	-	-	-	+	-	-	-	-	-	+	+	+	-	-	-	-	-
1320	-	-	-	-	-	+	-	+	-	-	-	-	-	-	-	-	-	+	-	-	-	+	-	-	+	-	-	-	-	-	-	+	-	-	-	+	-	-	-	-	-	+	+	+	-	-	-	-	-
1330	-	-	-	-	-	+	-	+	-	-	-	-	-	-	-	-	-	+	-	-	-	+	-	-	+	-	-	-	-	-	-	+	-	-	-	+	-	-	-	-	-	+	+	+	-	-	-	-	-
1340	-	-	-	-	-	+	-	+	-	-	-	-	-	-	-	-	-	+	-	-	-	+	-	-	+	-	-	-	-	-	-	+	-	-	-	+	-	-	-	-	-	+	+	+	-	-	-	-	-
1350	-	-	-	-	-	+	-	+	-	-	-	-	-	-	-	-	-	+	-	-	-	+	-	-	+	-	-	-	-	-	-	+	-	-	-	+	-	-	-	-	-	+	+	+	-	-	-	-	-
1360	-	-	-	-	-	+	-	+	-	-	-	-	-	-	-	-	-	+	-	-	-	+	-	-	+	-	-	-	-	-	-	+	-	-	-	+	-	-	-	-	-	+	+	+	-	-	-	-	-
1370	-	-	-	-	-	+	-	+	-	-	-	-	-	-	-	-	-	+	-	-	-	+	-	-	+	-	-	-	-	-	-	+	-	-	-	+	-	-	-	-	-	+	+	+	-	-	-	-	-
1380	-	-	-	-	-	+	-	+	-	-	-	-	-	-	-	-	-	+	-	-	-	+	-	-	+	-	-	-	-	-	-	+	-	-	-	+	-	-	-	-	-	+	+	+	-	-	-	-	-
1390	-	-	-	-	-	+	-	+	-	-	-	-	-	-	-	-	-	+	-	-	-	+	-	-	+	-	-	-	-	-	-	+	-	-	-	+	-	-	-	-	-	+	+	+	-	-	-	-	-
1400	-	-	-	-	-	+	-	+	-	-	-	-	-	-	-	-	-	+	-	-	-	+	-	-	+	-	-	-	-	-	-	+	-	-	-	+	-	-	-	-	-	+	+	+	-	-	-	-	-
1410	-	-	-	-	-	+	-	+	-	-	-	-	-	-	-	-	-	+	-	-	-	+	-	-	+	-	-	-	-	-	-	+	-	-	-	-	-	-	-	-	-	+	+	+	-	-	-	-	-
1420	-	-	-	-	-	+	-	+	-	-	-	-	-	-	-	-	-	+	-	-	-	+	-	-	+	-	-	-	-	-	-	+	-	-	-	-	-	-	-	-	-	+	+	+	-	-	-	-	-
1430	-	-	-	-	-	+	-	+	-	-	-	-	-	-	-	-	-	+	-	-	-	+	-	-	+	-	-	-	-	-	-	+	-	-	-	-	-	-	-	-	-	+	+	+	-	-	-	-	-
1440	-	-	-	-	-	+	-	+	-	-	-	-	-	-	-	-	-	+	-	-	-	+	-	-	+	-	-	-	-	-	-	+	-	-	-	-	-	-	-	-	-	+	+	+	-	-	-	-	-
1450	-	-	-	-	-	+	-	+	-	-	-	-	-	-	-	-	-	+	-	-	-	+	-	-	+	-	-	-	-	-	-	+	-	-	-	-	-	-	-	-	-	+	+	+	-	-	-	-	-
1460	-	-	-	-	-	+	-	+	-	-	-	-	-	-	-	-	-	+	-	-	-	+	-	-	+	-	-	-	-	-	-	+	-	-	-	-	-	-	-	-	-	+	+	+	-	-	-	-	-
1470	-	-	-	-	-	+	-	+	-	-	-	-	-	-	-	-	-	+	-	-	-	+	-	-	+	-	-	-	-	-	-	+	-	-	-	-	-	-	-	-	-	+	+	+	-	-	-	-	-
1480	-	-	-	-	-	+	-	+	-	-	-	-	-	-	-	-	-	+	-	-	-	+	-	-	+	-	-	-	-	-	-	+	-	-	-	-	-	-	-	-	-	+	+	+	-	-	-	-	-
1490	-	-	-	-	-	+	-	+	-	-	-	-	-	-	-	-	-	+	-	-	-	+	-	-	+	-	-	-	-	-	-	+	-	-	-	-	-	-	-	-	-	+	+	+	-	-	-	-	-
1500	-	-	-	-	-	+	-	+	-	-	-	-	-	-	-	-	-	+	-	-	-	+	-	-	+	-	-	-	-	-	-	+	-	-	-	-	-	-	-	-	-	+	+	+	-	-	-	-	-
1510	-	-	-	-	-	+	-	+	-	-	-	-	-	-	-	-	-	+	-	-	-	+	-	-	+	-	-	-	-	-	-	+	-	-	-	-	-	-	-	-	-	+	+	+	-	-	-	-	-
1520	-	-	-	-	-	+	-	+	-	-	-	-	-	-	-	-	-	+	-	-	-	+	-	-	+	-	-	-	-	-	-	+	-	-	-	-	-	-	-	-	-	+	+	+	-	-	-	-	-
1530	-	-	-	-	-	+	-	+	-	-	-	-	-	-	-	-	-	+	-	-	-	+	-	-	+	-	-	-	-	-	-	+	-	-	-	-	-	-	-	-	-	+	+	+	-	-	-	-	-
1540	-	-	-	-	-	+	-	+	-	-	-	-	-	-	-	-	-	+	-	-	-	+	-	-	+	-	-	-	-	-	-	+	-	-	-	-	-	-	-	-	-	+	+	+	-	-	-	-	-
1550	-	-	-	-	-	+	-	+	-	-	-	-	-	-	-	-	+	+	-	-	-	+	-	-	+	-	-	-	-	-	-	+	-	-	-	-	-	-	-	-	-	+	+	+	-	-	-	-	-
1560	-	-	-	-	-	+	-	+	-	-	-	-	-	-	-	-	+	+	-	-	-	-	-	-	+	-	-	-	-	-	-	+	-	-	-	-	-	-	-	-	-	+	+	+	-	-	-	-	-
1570	-	-	-	-	+	+	-	+	-	-	-	-	-	-	-	-	+	+	-	-	-	-	-	-	+	-	-	-	-	-	-	+	-	-	-	-	-	-	-	-	-	+	+	+	-	-	-	-	-
1580	-	-	-	-	+	+	-	+	-	-	-	-	-	-	-	-	+	+	-	-	-	-	-	-	+	-	-	-	-	-	-	+	-	-	-	-	-	-	-	-	-	+	+	+	-	-	-	-	-
1590	-	-	-	-	+	+	-	+	-	-	-	-	-	-	-	-	+	+	-	-	-	-	-	-	+	-	-	-	-	-	-	+	-	-	-	-	-	-	-	-	-	+	+	+	-	-	-	-	-
1600	-	-	-	-	+	+	-	+	-	-	-	-	-	-	-	-	+	+	-	-	-	-	-	-	+	-	-	-	+	-	-	+	-	-	-	-	-	-	-	-	-	+	+	+	-	-	-	-	-
1610	-	-	-	-	+	+	-	+	-	-	-	-	-	-	-	-	+	+	-	-	-	-	-	-	+	-	-	-	+	-	-	+	-	-	-	-	-	-	-	-	-	+	+	+	-	-	-	-	-
1620	-	-	-	-	+	+	-	+	-	-	-	-	-	-	-	-	+	+	-	-	-	-	-	-	+	-	-	-	+	-	-	+	-	-	-	-	-	-	-	-	-	+	+	+	-	-	-	-	-
1630	-	-	-	-	+	+	-	+	-	-	-	-	-	-	-	-	+	+	-	-	-	-	-	-	+	-	-	-	+	-	-	+	-	-	-	-	-	-	-	-	-	+	+	+	-	-	-	-	-
1640	-	-	-	-	+	+	-	+	-	-	-	-	-	-	-	-	+	+	-	-	-	-	-	-	+	-	-	-	+	-	-	+	-	-	-	-	-	-	-	-	-	+	+	+	-	-	-	-	-
1650	-	-	-	-	+	+	-	+	-	-	-	-	-	-	-	-	+	+	-	-	-	-	-	-	+	-	-	-	+	-	-	+	-	-	-	-	-	-	-	-	-	+	+	+	-	-	-	-	-
1660	-	-	-	-	+	+	-	+	-	-	-	-	-	-	-	-	+	+	-	-	-	-	-	-	+	-	-	-	+	-	-	+	-	-	-	-	-	-	-	-	-	+	+	+	-	-	-	-	-
1670	-	-	-	-	+	+	-	+	-	-	-	-	-	-	-	-	+	+	-	-	-	-	-	-	+	-	-	-	+	-	-	+	-	-	-	-	-	-	-	-	-	+	+	+	-	-	-	-	-
1680	-	-	-	-	+	+	-	+	-	-	-	-	-	-	-	-	+	+	-	-	-	-	-	-	+	-	-	-	+	-	-	+	-	-	-	-	-	-	-	-	-	+	+	+	-	-	-	-	-
1690	-	-	-	-	+	+	-	+	-	-	-	-	-	-	-	-	+	+	-	-	-	-	-	-	+	-	-	-	+	-	-	+	-	-	-	-	-	-	-	-	-	+	+	+	-	-	-	-	-
1700	-	-	-	-	+	+	-	+	-	-	-	-	-	-	-	-	+	+	-	-	-	-	-	-	+	-	-	-	+	-	-	+	-	-	-	-	-	-	-	-	-	+	+	+	-	-	-	-	-
1710	-	-	-	-	+	+	-	+	-	-	-	-	-	-	-	-	+	+	-	-	-	-	-	-	+	-	-	-	+	-	-	+	-	-	-	-	-	-	-	-	-	+	+	+	-	-	-	-	-
1720	-	-	-	-	+	+	-	+	-	-	-	-	-	-	-	-	+	+	-	-	-	-	-	-	+	-	-	-	+	-	-	+	-	-	-	-	-	-	-	-	-	+	+	+	-	-	-	-	-
1730	-	-	-	-	+	+	-	+	-	-	-	-	-	-	-	-	+	+	-	-	-	-	-	-	+	-	-	-	+	-	-	+	-	-	-	-	-	-	-	-	-	+	+	+	-	-	-	-	-
1740	-	-	-	-	+	+	-	+	-	-	-	-	-	-	-	-	+	+	-	-	-	-	-	-	+	-	-	-	+	-	-	+	-	-	-	-	-	-	-	-	-	+	+	+	-	-	-	-	-
1750	-	-	-	-	+	+	-	+	-	-	-	-	-	-	-	-	+	+	-	-	-	-	-	-	+	-	-	-	+	-	-	+	-	-	-	-	-	-	-	-	-	+	+	+	-	-	-	-	-
1760	-	-	-	-	+	+	-	+	-	-	-	-	-	-	-	-	+	+	-	-	-	-	-	-	+	-	-	-	+	-	-	+	-	-	-	-	-	-	-	-	-	+	+	+	-	-	-	-	-
1770	-	-	-	-	+	+	-	+	-	-	-	-	-	-	-	-	+	+	-	-	-	-	-	-	+	-	-	-	+	-	-	+	-	-	-	-	-	-	-	-	-	+	+	+	-	-	-	-	-
1780	-	-	-	-	+	+	-	+	-	-	-	-	-	-	-	-	+	+	-	-	-	-	-	-	+	-	-	-	+	-	-	+	-	-	-	-	-	-	-	-	-	+	+	+	-	-	-	-	-
1790	-	-	-	-	+	+	-	+	-	-	-	-	-	-	-	-	+	+	-	-	-	-	-	-	+	-	-	-	+	-	-	+	-	-	-	-	-	-	-	-	-	+	+	+	-	-	-	-	-
1800	-	-	-	-	+	+	-	+	-	-	-	-	-	-	-	-	+	+	-	-	-	-	-	-	+	-	-	-	+	-	-	+	-	-	-	-	-	-	-	-	-	+	+	+	-	-	-	-	-
1810	-	-	-	-	+	+	-	+	-	-	-	-	-	-	-	-	+	+	-	-	-	-	-	-	+	-	-	-	+	-	-	+	-	-	-	-	-	-	-	-	-	+	+	+	-	-	-	-	-
1820	-	-	-	-	+	+	-	+	-	-	-	-	-	-	-	-	+	+	-	-	-	-	-	-	+	-	-	-	+	-	-	+	-	-	-	-	-	-	-	-	-	+	+	+	-	-	-	-	-
1830	-	-	-	-	+	+	-	+	-	-	-	-	-	-	-	-	+	+	-	-	-	-	-	-	+	-	-	-	+	-	-	+	-	-	-	-	-	-	-	-	-	+	+	+	-	-	-	-	-
1840	-	-	-	-	+	+	-	+	-	-	-	-	-	-	-	-	+	+	-	-	-	-	-	-	+	-	-	-	+	-	-	+	-	-	-	-	-	-	-	-	-	+	+	+	-	-	-	-	-
1850	-	-	-	-	+	+	-	+	-	-	-	-	-	-	-	-	+	+	-	-	-	-	-	-	+	-	-	-	+	-	-	+	-	-	-	-	-	-	-	-	-	+	+	+	-	-	-	-	-
1860	-	-	-	-	+	+	-	+	-	-	-	-	-	-	-	-	+	+	-	-	-	-	-	-	+	-	-	-	+	-	-	+	-	-	-	-	-	-	-	-	-	+	+	+	-	-	-	-	-
1870	-	-	-	-	+	+	-	+	-	-	-	-	-	-	-	-	+	+	-	-	-	-	-	-	+	-	-	-	+	-	-	+	-	-	-	-	-	-	-	-	-	+	+	+	-	-	-	-	-
1880	-	-	-	-	+	+	-	+	-	-	-	-	-	-	-	-	+	+	-	-	-	-	-	-	+	-	-	-	+	-	-	+	-	-	-	-	-	-	-	-	-	+	+	+	-	-	-	-	-
1890	-	-	-	-	+	+	-	+	-	-	-	-	-	-	-	-	+	+	-	-	-	-	-	-	+	-	-	-	+	-	-	+	-	-	-	-	-	-	-	-	-	+	+	+	-	-	-	-	-
1900	-	-	-	-	+	+	-	+	-	-	-	-	-	-	-	-	+	+	-	-	-	-	-	-	+	-	-	-	+	-	-	+	-	-	-	-	-	-	-	-	-	+	+	+	-	-	-	-	-
1910	-	-	-	-	+	-	-	+	-	-	-	-	-	-	-	-	+	+	-	-	-	-	-	-	+	-	-	-	+	-	-	+	-	-	-	-	-	-	-	-	-	+	+	+	-	-	-	-	-
1920	-	-	-	-	+	-	-	+	-	-	-	-	-	-	-	-	+	+	-	-	-	-	-	-	+	-	-	-	+	-	-	+	-	-	-	-	-	-	-	-	-	+	+	+	-	-	-	-	-
1930	-	-	-	-	+	-	-	+	-	-	-	-	-	-	-	-	+	+	-	-	-	-	-	-	+	-	-	-	+	-	-	+	-	-	-	-	-	-	-	-	-	+	+	+	-	-	-	-	-
1940	-	-	-	-	+	-	-	+	-	-	-	-	-	-	-	-	+	+	-	-	-	-	-	-	+	-	-	-	+	-	-	+	-	-	-	-	-	-	-	-	-	+	+	+	-	-	-	-	-
1950	-	-	-	-	+	-	-	+	-	-	-	-	-	-	-	-	+	+	-	-	-	-	-	-	+	-	-	-	+	-	-	+	-	-	-	-	-	-	-	-	-	+	+	+	-	-	-	-	-
1960	-	-	-	-	+	-	-	+	-	-	-	-	-	-	-	-	+	+	-	-	-	-	-	-	+	-	-	-	+	-	-	+	-	-	-	-	-	-	-	-	-	+	+	+	-	-	-	-	-
1970	-	-	-	-	+	-	-	+	-	-	-	-	-	-	-	-	+	+	-	-	-	-	-	-	+	-	-	-	+	-	-	+	-	-	-	-	-	-	-	-	-	+	+	+	-	-	-	-	-
1980	-	-	-	-	+	-	-	+	-	-	-	-	-	-	-	-	+	+	-	-	-	-	-	-	+	-	-	-	+	-	-	+	-	-	-	-	-	-	-	-	-	+	+	+	-	-	-	-	-
1990	-	-	-	-	+	-	-	+	-	-	-	-	-	-	-	-	+	+	-	-	-	-	-	-	+	-	-	-	+	-	-	+	-	-	-	-	-	-	-	-	-	+	+	+	-	-	-	-	-
2000	-	-	-	-	+	-	-	+	-	-	-	-	-	-	-	-	+	+	-	-	-	-	-	-	+	-	-	-	+	-	-	+	-	-	-	-	-	-	-	-	-	+	+	+	-	-	-	-	-
[truncated: 47 more columns]

## Sheet: Fig 5
Fig 5B
Sample	Transgene	Antibody	Replicate	Target	Sample Qty (SDM)	Input Qty (SDM, 1/10 volume)	Input %	Mean input %	SE	t-value	P-value
EAT1-GFP	TG	GFP	Replicate1, PCR1	chr5-20-Ebox1	0.043	5.48	0.0785	0.0893292	0.0194597
			Replicate2, PCR1		0.0381	5.25	0.0726		0.0194597
			Replicate1, PCR2		0.05316	7.191	0.0739257		0.0194597
			Replicate2, PCR2		0.09726	6.013	0.16175		0.0194597
			Replicate1, PCR3		0.09726	7.791	0.124836		0.0194597
			Replicate2, PCR3		0.01627	6.678	0.0243636		0.0194597
		IgG	Replicate1, PCR1		0.00539	5.48	0.00984	0.0219063	0.00291649	3.08329	0.00872291
			Replicate2, PCR1		0.018	5.25	0.0342		0.00291649
			Replicate3, PCR1		0.00455	3.51	0.013		0.00291649
			Replicate1, PCR2		0.01484	7.191	0.0206369		0.00291649
			Replicate2, PCR2		0.02044	6.013	0.033993		0.00291649
			Replicate3, PCR2		0.01104	5.029	0.0219527		0.00291649
			Replicate1, PCR3		0.01181	7.791	0.0252891		0.00291649
			Replicate2, PCR3		0.01057	6.678	0.0135669		0.00291649
			Replicate3, PCR3		0.01648	4.67	0.024678		0.00291649
	non-TG	GFP	Replicate1, PCR1		0.00395	5.6	0.00705	0.0163097	0.00295867	3.24534	0.00638519
			Replicate2, PCR1		0.00736	7.81	0.00943		0.00295867
			Replicate3, PCR1		0.0144	6.92	0.0209		0.00295867
			Replicate1, PCR2		0.007671	7.791	0.00984598		0.00295867
			Replicate2, PCR2		0.01502	7.936	0.0189264		0.00295867
			Replicate3, PCR2		0.02649	8.235	0.0321676		0.00295867
			Replicate1, PCR3		0.005849	7.325	0.00798498		0.00295867
			Replicate2, PCR3		0.01211	8.598	0.0140847		0.00295867
			Replicate3, PCR3		0.02044	7.743	0.026398		0.00295867
		IgG	Replicate1, PCR1		0.00289	5.6	0.00516	0.0112286	0.00144446	3.36874	0.00503591
			Replicate2, PCR1		0.00831	7.81	0.0106		0.00144446
			Replicate3, PCR1		0.00819	6.92	0.0118		0.00144446
			Replicate1, PCR2		0.004772	7.791	0.00612502		0.00144446
			Replicate2, PCR2		0.01312	7.936	0.0165323		0.00144446
			Replicate3, PCR2		0.01038	8.235	0.0126047		0.00144446
			Replicate1, PCR3		0.006455	7.325	0.00881229		0.00144446
			Replicate2, PCR3		0.009519	8.598	0.0110712		0.00144446
			Replicate3, PCR3		0.01421	7.743	0.0183521		0.00144446
Sample	Transgene	Antibody	Replicate	Target	Sample Qty (SDM)	Input Qty (SDM, 1/10 volume)	Input %	Mean input %	SE	t-value	P-value
EAT1-GFP	TG	GFP	Replicate1, PCR1	chr6-97-Ebox1	0.2171	10.06	0.215805	0.104981	0.0271103
			Replicate2, PCR1		0.06296	9.671	0.0651019		0.0271103
			Replicate1, PCR2		0.1	8.124	0.123092		0.0271103
			Replicate2, PCR2		0.03939	6.922	0.0569055		0.0271103
			Replicate1, PCR3		0.09424	7.088	0.132957		0.0271103
			Replicate2, PCR3		0.02662	7.389	0.0360265		0.0271103
		IgG	Replicate1, PCR1		0.01421	10.06	0.0146923	0.0189057	0.00649266	2.92661	0.0117899
			Replicate2, PCR1		0.05758	9.671	0.0141252		0.00649266
			Replicate3, PCR1		0.009096	6.191	0.0595388		0.00649266
			Replicate1, PCR2		0.001821	8.124	0.0114621		0.00649266
			Replicate2, PCR2		0.005758	6.922	0.00224151		0.00649266
			Replicate3, PCR2		0.005331	4.651	0.00831841		0.00649266
			Replicate1, PCR3		0.005206	7.088	0.00734481		0.00649266
			Replicate2, PCR3		0.03277	7.389	0.0443497		0.00649266
			Replicate3, PCR3		0.003779	4.678	0.00807824		0.00649266
	non-TG	GFP	Replicate1, PCR1		0.008136	9.405	0.00865072	0.0141251	0.00377756	3.01608	0.00992701
			Replicate2, PCR1		0.01106	10.75	0.0102884		0.00377756
			Replicate3, PCR1		0.04285	11.06	0.0387432		0.00377756
			Replicate1, PCR2		0.004569	7.656	0.00596787		0.00377756
			Replicate2, PCR2		0.01579	8.173	0.0193197		0.00377756
			Replicate3, PCR2		0.001598	8.419	0.00189809		0.00377756
			Replicate1, PCR3		0.003477	7.301	0.00476236		0.00377756
			Replicate2, PCR3		0.01515	8.673	0.017468		0.00377756
			Replicate3, PCR3		0.01768	8.828	0.0200272		0.00377756
		IgG	Replicate1, PCR1		0.005663	9.405	0.00602127	0.0183489	0.00640423	2.93878	0.0115175
			Replicate2, PCR1		0.004685	10.75	0.00435814		0.00640423
			Replicate3, PCR1		0.01461	11.06	0.0132098		0.00640423
			Replicate1, PCR2		0.005657	7.656	0.00738898		0.00640423
			Replicate2, PCR2		0.0032	8.173	0.00391533		0.00640423
			Replicate3, PCR2		0.02436	8.419	0.0289346		0.00640423
			Replicate1, PCR3		0.006003	7.301	0.00822216		0.00640423
			Replicate2, PCR3		0.02742	8.673	0.0316154		0.00640423
			Replicate3, PCR3		0.05427	8.828	0.0614749		0.00640423
Sample	Transgene	Antibody	Replicate	Target	Sample Qty (SDM)	Input Qty (SDM, 1/10 volume)	Input %	Mean input %	SE	t-value	P-value
EAT1-GFP	TG	GFP	Replicate1, PCR1	chr6-97-Ebox2	0.01557	3.959	0.0393281	0.0692118	0.0242142
			Replicate2, PCR1		0.002089	2.315	0.00902376
			Replicate1, PCR2		0.05321	3.264	0.163021
			Replicate2, PCR2		0.01181	2.085	0.0566427
			Replicate1, PCR3		0.04042	3.403	0.118778
			Replicate2, PCR3		0.006305	2.214	0.0284779
		IgG	Replicate1, PCR1		0.001711	3.959	0.0043218	0.0428364	0.0130347	1.40674	0.182959
			Replicate2, PCR1		0.01159	2.315	0.0500648		0.0130347
			Replicate3, PCR1		0.004803	2.131	0.0225387		0.0130347
			Replicate1, PCR2		0.009579	3.264	0.0293474		0.0130347
			Replicate2, PCR2		0.02859	2.085	0.137122		0.0130347
			Replicate3, PCR2		0.007498	2.392	0.0313462		0.0130347
			Replicate1, PCR3		0.005662	3.403	0.0166383		0.0130347
			Replicate2, PCR3		0.01339	2.214	0.0604788		0.0130347
			Replicate3, PCR3		0.007148	2.123	0.0336693		0.0130347
	non-TG	GFP	Replicate1, PCR1		0.004705	2.638	0.0178355	0.0331053	0.00974835	1.73899	0.105644
			Replicate2, PCR1		0.004302	1.922	0.0223829		0.00974835
			Replicate3, PCR1		0.001796	5.141	0.00349348		0.00974835
			Replicate1, PCR2		0.01363	2.845	0.0479086		0.00974835
			Replicate2, PCR2		0.02172	2.161	0.100509		0.00974835
			Replicate3, PCR2		0.01563	4.072	0.0383841		0.00974835
			Replicate1, PCR3		0.00306	2.778	0.0110151		0.00974835
			Replicate2, PCR3		0.008449	2.098	0.0402717		0.00974835
			Replicate3, PCR3		0.007321	4.534	0.0161469		0.00974835
		IgG	Replicate1, PCR1		0.002751	2.638	0.0104284	0.0291437	0.00680395	1.88495	0.0819858
			Replicate2, PCR1		0.003775	1.922	0.019641		0.00680395
			Replicate3, PCR1		0.003029	5.141	0.00589185		0.00680395
			Replicate1, PCR2		0.01455	2.845	0.0511424		0.00680395
			Replicate2, PCR2		0.01387	2.161	0.0641832		0.00680395
			Replicate3, PCR2		0.01412	4.072	0.0346758		0.00680395
			Replicate1, PCR3		0.007365	2.778	0.0265119		0.00680395
			Replicate2, PCR3		0.008758	2.098	0.0417445		0.00680395
			Replicate3, PCR3		0.003661	4.534	0.00807455		0.00680395
Sample	Transgene	Antibody	Replicate	Target	Sample Qty (SDM)	Input Qty (SDM, 1/10 volume)	Input %	Mean input %	SE	t-value	P-value
EAT1-GFP	TG	GFP	Replicate1, PCR1	Ubq-control	0.002108	5.414	0.00389361	0.00777741	0.00270375
			Replicate2, PCR1		0.004023	2.136	0.0188343		0.00270375
			Replicate1, PCR2		0.006005	5.781	0.0103875		0.00270375
			Replicate2, PCR2		5.734e-07	5.095	1.12542e-06		0.00270375
			Replicate1, PCR3		0.005099	5.488	0.00929118		0.00270375
			Replicate2, PCR3		0.002185	5.133	0.00425677		0.00270375
		IgG	Replicate1, PCR1		0.002708	5.414	0.00500185	0.0068394	0.00486791	0.809747	0.435253
			Replicate2, PCR1		0.006556	2.136	0.0306929		0.00486791
			Replicate1, PCR2		3.124e-06	5.781	5.40391e-06		0.00486791
			Replicate2, PCR2		0.0001537	5.095	0.000301668		0.00486791
			Replicate1, PCR3		5.268e-05	5.488	9.59913e-05		0.00486791
			Replicate2, PCR3		0.002535	5.133	0.00493863		0.00486791
	non-TG	GFP	Replicate1, PCR1		0.0002251	6.957	0.000323559	0.00366733	0.00202836	1.63652	0.125698
			Replicate2, PCR1		0.004241	4.591	0.00923764		0.00202836
			Replicate3, PCR1		0.01141	6.343	0.0179883		0.00202836
			Replicate1, PCR2		0.0005202	5.912	0.000879905		0.00202836
			Replicate2, PCR2		3.66e-05	5.781	6.33108e-05		0.00202836
			Replicate3, PCR2		0.0005688	6.416	0.000886534		0.00202836
			Replicate1, PCR3		9.092e-07	6.321	1.43838e-06		0.00202836
			Replicate2, PCR3		0.001473	7.172	0.00205382		0.00202836
			Replicate3, PCR3		0.00107	6.809	0.00157145		0.00202836
		IgG	Replicate1, PCR1		0.001276	6.957	0.00183412	0.00270441	0.00127527	2.00688	0.0660219
			Replicate2, PCR1		0.0008592	4.591	0.00187149		0.00127527
			Replicate3, PCR1		0.002586	6.343	0.00407694		0.00127527
			Replicate1, PCR2		1.533e-05	5.912	2.59303e-05		0.00127527
			Replicate2, PCR2		2.207e-05	5.781	3.81768e-05		0.00127527
			Replicate3, PCR2		0.002121	6.416	0.0033058		0.00127527
			Replicate1, PCR3		0.0006599	6.321	0.00104398		0.00127527
			Replicate2, PCR3		1.41e-06	7.172	1.96598e-06		0.00127527
			Replicate3, PCR3		0.008267	6.809	0.0121413		0.00127527
Fig 5C
Genotype	Target	Sample stage	Replicates	Qty(SDM)	Relative quantity	Mean	SE		Internal Standard	Qty(SDM)
WT	DCL3b	ST.1	replicate1	8.815e-05	0.0142799	0.0108835	0.00208348		Ubiquitine	0.006173
			replicate2	6.532e-05	0.0070946					0.009207
			replicate3	9.315e-05	0.0112759					0.008261
		ST.2	replicate1	0.007529	0.401547	0.49713	0.0510958			0.01875
			replicate2	0.004509	0.57623					0.007825
			replicate3	0.004301	0.513614					0.008374
		ST.3	replicate1	0.003137	0.258189	0.207443	0.0288038			0.01215
			replicate2	0.002787	0.205683					0.01355
			replicate3	0.002033	0.158457					0.01283
		ST.4	replicate1	0.0003821	0.0166275	0.0177763	0.00116754			0.02298
			replicate2	0.0004879	0.0201113					0.02426
			replicate3	0.0004335	0.0165901					0.02613
		ST.5	replicate1	0.0003791	0.0440609	0.0436155	0.00403446			0.008604
			replicate2	0.0004765	0.05037					0.00946
			replicate3	0.000638	0.0364155					0.01752
		ST.6	replicate1	0.0003645	0.0301988	0.0276213	0.0043353			0.01207
			replicate2	0.000185	0.019163					0.009654
			replicate3	0.0001986	0.033502					0.005928
Genotype	Target	Sample stage	Replicates	Qty(SDM)	Relative quantity	Mean	SE		Internal Standard	Qty(SDM)
eat1-4	DCL3b	ST.1	replicate1	7.181e-05	0.0121137	0.0120621	0.000694521		Ubiquitine	0.005928
			replicate2	7.013e-05	0.0108342					0.006473
			replicate3	0.0001349	0.0132385					0.01019
		ST.2	replicate1	0.002271	0.20133	0.2289	0.0257874			0.01128
			replicate2	0.001519	0.204938					0.007412
			replicate3	0.002617	0.280433					0.009332
		ST.3	replicate1	0.001267	0.0723174	0.0951332	0.0158792			0.01752
			replicate2	0.001208	0.0874096					0.01382
			replicate3	0.001074	0.125673					0.008546
		ST.4	replicate1	0.0002419	0.0105265	0.0168058	0.00418699			0.02298
			replicate2	0.0003761	0.0247434					0.0152
			replicate3	0.0003187	0.0151473					0.02104
		ST.5	replicate1	0.0002992	0.0175484	0.0204754	0.00420273			0.01705
			replicate2	0.0002033	0.0151152					0.01345
			replicate3	0.0003975	0.0287627					0.01382
		ST.6	replicate1	0.0001267	0.0187926	0.0393931	0.0135171			0.006742
			replicate2	0.0001939	0.0345325					0.005615
			replicate3	0.0003137	0.0648542					0.004837
Fig 5E
Sample	Transgene	Antibody	Replicate	Target	Sample Qty (SDM)	Input Qty (SDM, 1/10 volume)	Input %	Mean input %	SE	t-value	P-value
EAT1-GFP	TG	GFP	Replicate1, PCR1	DCL3b-Ebox3	0.02459	6.228	0.039483	0.0884387	0.014811
			Replicate2, PCR1		0.02685	5.152	0.0521157		0.014811
			Replicate1, PCR2		0.07251	7.935	0.09138		0.014811
			Replicate2, PCR2		0.09408	6.944	0.135484		0.014811
			Replicate1, PCR3		0.07099	6.899	0.102899		0.014811
			Replicate2, PCR3		0.06294	5.76	0.109271		0.014811
	non-TG	IgG	Replicate1, PCR1		0.02298	6.228	0.0425398	0.0407223	0.00864918	2.94404	0.0114017
			Replicate2, PCR1		0.01005	5.152	0.0161368		0.00864918
			Replicate3, PCR1		0.02206	5.402	0.0428183		0.00864918
			Replicate1, PCR2		0.0128	7.935	0.0161311		0.00864918
			Replicate2, PCR2		0.03514	6.944	0.0506048		0.00864918
			Replicate3, PCR2		0.05211	5.524	0.0943338		0.00864918
			Replicate1, PCR3		0.005556	6.899	0.00805334		0.00864918
			Replicate2, PCR3		0.02969	5.76	0.0515451		0.00864918
			Replicate3, PCR3		0.01664	3.753	0.0443379		0.00864918
	TG	GFP	Replicate1, PCR1		0.006927	5.703	0.0121462	0.0272127	0.00489936	3.52308	0.00374467
			Replicate2, PCR1		0.01837	6.27	0.0292982		0.00489936
			Replicate3, PCR1		0.01479	6.186	0.0239088		0.00489936
			Replicate1, PCR2		0.005638	9.663	0.00583463		0.00489936
			Replicate2, PCR2		0.03768	9.724	0.0387495		0.00489936
			Replicate3, PCR2		0.04252	8.897	0.0477914		0.00489936
			Replicate1, PCR3		0.01037	7.437	0.0139438		0.00489936
			Replicate2, PCR3		0.02317	8.018	0.0288975		0.00489936
			Replicate3, PCR3		0.0345	7.78	0.0443445		0.00489936
	non-TG	IgG	Replicate1, PCR1		0.02667	5.703	0.0467649	0.0298612	0.00534518	3.42934	0.00448248
			Replicate2, PCR1		0.005355	6.27	0.00854067		0.00534518
			Replicate3, PCR1		0.03224	6.186	0.0521177		0.00534518
			Replicate1, PCR2		0.021	9.663	0.0217324		0.00534518
			Replicate2, PCR2		0.01996	9.724	0.0205265		0.00534518
			Replicate3, PCR2		0.04389	8.897	0.0493312		0.00534518
			Replicate1, PCR3		0.01232	7.437	0.0165658		0.00534518
			Replicate2, PCR3		0.01591	8.018	0.0198429		0.00534518
			Replicate3, PCR3		0.02593	7.78	0.033329		0.00534518
Sample	Transgene	Antibody	Replicate	Target	Sample Qty (SDM)	Input Qty (SDM, 1/10 volume)	Input %	Mean input %	SE	t-value	P-value
EAT1-GFP	TG	GFP	Replicate1, PCR1	DCL3b-Ebox2	0.0404	7.23	0.0558783	0.0807957	0.0133482
			Replicate2, PCR1		0.0369	6.78	0.0544248		0.0133482
			Replicate1, PCR2		0.05858	5.995	0.0977148		0.0133482
			Replicate2, PCR2		0.0499	4.698	0.106215		0.0133482
			Replicate1, PCR3		0.0763	6.137	0.124328		0.0133482
			Replicate2, PCR3		0.02874	6.219	0.0462132		0.0133482
	non-TG	IgG	Replicate1, PCR1		0.004323	7.231	0.00597843	0.0123407	0.00414223	4.05229	0.00137045
			Replicate2, PCR1		0.01126	6.784	0.0165979		0.00414223
			Replicate3, PCR1		0.01794	4.806	0.0373283		0.00414223
			Replicate1, PCR2		0.002777	5.995	0.00463219		0.00414223
			Replicate2, PCR2		0.01247	4.698	0.0265432		0.00414223
			Replicate3, PCR2		0.005344	4.977	0.0107374		0.00414223
			Replicate1, PCR3		0.0001729	6.137	0.000281734		0.00414223
			Replicate2, PCR3		0.004745	6.219	0.00762984		0.00414223
			Replicate3, PCR3		0.0007143	5.343	0.00133689		0.00414223
	TG	GFP	Replicate1, PCR1		0.005986	6.784	0.0088237	0.0112944	0.002924	4.01842	0.00146057
			Replicate2, PCR1		0.01852	7.466	0.0248058		0.002924
			Replicate3, PCR1		0.002062	7.324	0.0028154		0.002924
			Replicate1, PCR2		0.002867	5.806	0.004938		0.002924
			Replicate2, PCR2		0.007415	6.191	0.0119771		0.002924
			Replicate3, PCR2		0.01502	5.769	0.0260357		0.002924
			Replicate1, PCR3		0.001799	6.513	0.00276217		0.002924
			Replicate2, PCR3		0.008998	7.003	0.0128488		0.002924
			Replicate3, PCR3		0.004652	7.003	0.00664287		0.002924
	non-TG	IgG	Replicate1, PCR1		0.003686	6.784	0.00543337	0.0137587	0.00449808	4.01711	0.00146416
			Replicate2, PCR1		0.01239	7.466	0.0165952		0.00449808
			Replicate3, PCR1		0.0001478	7.324	0.000201802		0.00449808
			Replicate1, PCR2		0.003137	5.806	0.00540303		0.00449808
			Replicate2, PCR2		0.002014	6.191	0.00325311		0.00449808
			Replicate3, PCR2		0.02031	5.769	0.0352054		0.00449808
			Replicate1, PCR3		0.01884	6.513	0.0289268		0.00449808
			Replicate2, PCR3		PCR error	7.003	-		0.00449808
			Replicate3, PCR3		0.01054	7.003	0.0150507		0.00449808
Sample	Transgene	Antibody	Replicate	Target	Sample Qty (SDM)	Input Qty (SDM, 1/10 volume)	Input %	Mean input %	SE	t-value	P-value
EAT1-GFP	TG	GFP	Replicate1, PCR1	DCL3b-Ebox１	0.06811	6.627	0.102777	0.0618098	0.0115203
			Replicate2, PCR1		0.0136	5.414	0.0251201		0.0115203
			Replicate1, PCR2		0.04458	6.584	0.0677096		0.0115203
			Replicate2, PCR2		0.01922	5.63	0.0341385		0.0115203
			Replicate1, PCR3		0.03632	5.247	0.0692205		0.0115203
			Replicate2, PCR3		0.03049	4.241	0.0718934		0.0115203
		IgG	Replicate1, PCR1		0.00932	6.627	0.0140637	0.0292626	0.00464324	2.70421	0.0180485
			Replicate2, PCR1		0.0196	5.414	0.0362024		0.00464324
			Replicate3, PCR1		0.01471	4.09	0.0359658		0.00464324
			Replicate1, PCR2		0.0152	6.584	0.0230863		0.00464324
			Replicate2, PCR2		PCR error	5.63	-		0.00464324
			Replicate3, PCR2		0.01698	4.253	0.0399248		0.00464324
			Replicate1, PCR3		0.003464	5.247	0.00660187		0.00464324
			Replicate2, PCR3		0.01804	4.241	0.0425371		0.00464324
			Replicate3, PCR3		0.01028	2.878	0.0357192		0.00464324
	non-TG	GFP	Replicate1, PCR1		0.0156	6.67	0.0157121	0.0243801	0.00305813	2.9764	0.0107143
			Replicate2, PCR1		0.008562	7.902	0.0163376		0.00305813
			Replicate3, PCR1		0.04176	7.501	0.0284362		0.00305813
			Replicate1, PCR2		0.0152	6.29	0.0241653		0.00305813
			Replicate2, PCR2		0.02133	7.55	0.0282517		0.00305813
			Replicate3, PCR2		0.02544	6.541	0.0388931		0.00305813
			Replicate1, PCR3		0.006365	5.247	0.0121307		0.00305813
			Replicate2, PCR3		0.01206	6.017	0.0200432		0.00305813
			Replicate3, PCR3		0.01992	5.619	0.0354511		0.00305813
		IgG	Replicate1, PCR1		0.0156	6.67	0.0233883	0.0239592	0.00572275	3.00779	0.0100867
			Replicate2, PCR1		0.008562	7.902	0.0108352		0.00572275
			Replicate3, PCR1		0.04176	7.501	0.0556726		0.00572275
			Replicate1, PCR2		0.009381	6.29	0.0149141		0.00572275
			Replicate2, PCR2		0.01097	7.55	0.0145298		0.00572275
			Replicate3, PCR2		PCR error	6.541	-		0.00572275
			Replicate1, PCR3		0.005106	5.247	0.00973128		0.00572275
			Replicate2, PCR3		0.01321	6.017	0.0219545		0.00572275
			Replicate3, PCR3		0.02284	5.619	0.0406478		0.00572275
Fig 5F
Sample	Transgene	Antibody	Replicate	Target	Sample Qty (SDM)	Input Qty (SDM, 1/10 volume)	Input %	Mean input %	SE	t-value	P-value
YFP-TIP2	TG	GFP	Replicate1, PCR1	chr5-20-Ebox1	0.0124	7.7	0.016	0.0441947	0.012103
			Replicate2, PCR1		0.0365	6.87	0.0531		0.012103
			Replicate3, PCR1		0.0358	12.6	0.0285		0.012103
			Replicate1, PCR2		0.0154	10.28	0.0149805		0.012103
			Replicate2, PCR2		0.07743	8.441	0.0917308		0.012103
			Replicate3, PCR2		0.06637	14.61	0.0454278		0.012103
			Replicate1, PCR3		0.02506	9.847	0.0254494		0.012103
			Replicate2, PCR3		0.07695	6.802	0.113128		0.012103
			Replicate3, PCR3		0.01404	14.88	0.00943548		0.012103
		IgG	Replicate1, PCR1		0.00478	7.7	0.00621	0.0118185	0.00344641	2.81125	0.0147095
			Replicate2, PCR1		0.0181	6.87	0.0263		0.00344641
			Replicate1, PCR2		0.01083	10.28	0.010535		0.00344641
			Replicate2, PCR2		0.006145	8.441	0.00727994		0.00344641
			Replicate1, PCR3		0.003594	9.847	0.00364984		0.00344641
			Replicate2, PCR3		0.01152	6.802	0.0169362		0.00344641
	non-TG	GFP	Replicate1, PCR1		0.00898	18.4	0.00488	0.0142093	0.0037001	2.64062	0.0203721
			Replicate2, PCR1		0.0171	17.8	0.00963		0.0037001
			Replicate1, PCR2		0.04232	17.04	0.0248357		0.0037001
			Replicate2, PCR2		0.01617	20.13	0.00803279		0.0037001
			Replicate1, PCR3		0.04473	17.04	0.02625		0.0037001
			Replicate2, PCR3		0.02108	18.13	0.0116271		0.0037001
		IgG	Replicate1, PCR1		0.000842	18.4	0.000457	0.00490173	0.00124098	3.2893	0.00586728
			Replicate2, PCR1		0.0131	17.8	0.00736		0.00124098
			Replicate1, PCR2		0.004432	17.04	0.00260094		0.00124098
			Replicate2, PCR2		0.01256	20.13	0.00623944		0.00124098
			Replicate1, PCR3		0.007257	17.04	0.0042588		0.00124098
			Replicate2, PCR3		0.0154	18.13	0.00849421		0.00124098
Sample	Transgene	Antibody	Replicate	Target	Sample Qty (SDM)	Input Qty (SDM, 1/10 volume)	Input %	Mean input %	SE	t-value	P-value
YFP-TIP2	TG	GFP	Replicate1, PCR1	chr6-97-Ebox1	0.01588	10.93	0.0145288	0.0246459	0.00896464
			Replicate2, PCR1		0.02653	10.11	0.091998		0.00896464
			Replicate3, PCR1		0.02653	16.24	0.0163362		0.00896464
			Replicate1, PCR2		0.02137	9.941	0.0214968		0.00896464
			Replicate2, PCR2		0.005758	6.84	0.00841813		0.00896464
			Replicate3, PCR2		0.0298	14.79	0.0201487		0.00896464
			Replicate1, PCR3		0.002962	10.06	0.00294433		0.00896464
			Replicate2, PCR3		0.02615	7.389	0.0353904		0.00896464
			Replicate3, PCR3		0.01589	15.06	0.0105511		0.00896464
		IgG	Replicate1, PCR1		0.01011	10.93	0.00924977	0.0179664	0.00698902	1.1189	0.283431
			Replicate2, PCR1		0.01963	10.11	0.0194164		0.00698902
			Replicate1, PCR2		0.0032	9.941	0.00321899		0.00698902
			Replicate2, PCR2		0.01428	6.84	0.0208772		0.00698902
			Replicate1, PCR3		0.005427	10.06	0.00539463		0.00698902
			Replicate2, PCR3		0.03668	7.389	0.0496414		0.00698902
	non-TG	GFP	Replicate1, PCR1		0.08995	18.36	0.0489924	0.019241	0.00623747	1.04622	0.314523
			Replicate2, PCR1		0.02868	19.41	0.0147759		0.00623747
			Replicate1, PCR2		0.03498	16.86	0.0207473		0.00623747
			Replicate2, PCR2		0.01362	19.32	0.00704969		0.00623747
			Replicate1, PCR3		0.02176	16.17	0.013457		0.00623747
			Replicate2, PCR3		0.01944	18.65	0.0104236		0.00623747
		IgG	Replicate1, PCR1		0.007567	18.36	0.00412146	0.00863217	0.00218846	2.07424	0.0584793
			Replicate2, PCR1		0.02099	19.41	0.010814		0.00218846
			Replicate1, PCR2		0.02742	16.86	0.0162633		0.00218846
			Replicate2, PCR2		0.008419	19.32	0.00435766		0.00218846
			Replicate1, PCR3		0.005758	16.17	0.00356092		0.00218846
			Replicate2, PCR3		0.02364	18.65	0.0126756		0.00218846
Sample	Transgene	Antibody	Replicate	Target	Sample Qty (SDM)	Input Qty (SDM, 1/10 volume)	Input %	Mean input %	SE	t-value	P-value
YFP-TIP2	TG	GFP	Replicate1, PCR1	chr6-97-Ebox2	0.01657	3.595	0.0460918	0.0546021	0.0170547
			Replicate2, PCR1		0.002223	2.031	0.0109453		0.0170547
			Replicate3, PCR1		0.01216	10.23	0.0118866		0.0170547
			Replicate1, PCR2		0.04018	3.444	0.116667		0.0170547
			Replicate2, PCR2		0.03108	2.048	0.151758		0.0170547
			Replicate3, PCR2		0.03359	8.191	0.0410084		0.0170547
			Replicate1, PCR3		0.008602	3.591	0.0239543		0.0170547
			Replicate2, PCR3		0.01751	2.187	0.080064		0.0170547
			Replicate3, PCR3		0.007959	8.8	0.00904432		0.0170547
		IgG	Replicate1, PCR1		0.001759	3.595	0.00489291	0.0264234	0.00560816	1.94023	0.0743557
			Replicate2, PCR1		0.007668	2.031	0.0377548		0.00560816
			Replicate1, PCR2		0.01188	3.444	0.0344948		0.00560816
			Replicate2, PCR2		0.007453	2.048	0.0363916		0.00560816
			Replicate1, PCR3		0.004906	3.591	0.0136619		0.00560816
			Replicate2, PCR3		0.006855	2.187	0.0313443		0.00560816
	non-TG	GFP	Replicate1, PCR1		0.008046	9.55	0.00842513	0.0197653	0.00450601	2.28557	0.0397069
			Replicate2, PCR1		0.0168	8.613	0.0195054		0.00450601
			Replicate1, PCR2		0.01238	7.139	0.0173414		0.00450601
			Replicate2, PCR2		0.02945	7.855	0.037492		0.00450601
			Replicate1, PCR3		0.02083	7.809	0.0266744		0.00450601
			Replicate2, PCR3		0.007148	7.809	0.00915354		0.00450601
		IgG	Replicate1, PCR1		0.0003872	9.55	0.000405445	0.0138895	0.0040898	2.58024	0.0228462
			Replicate2, PCR1		0.00511	8.613	0.00593289		0.0040898
			Replicate1, PCR2		0.01355	7.139	0.0189802		0.0040898
			Replicate2, PCR2		0.02224	7.855	0.0283132		0.0040898
			Replicate1, PCR3		0.009077	7.809	0.0116238		0.0040898
			Replicate2, PCR3		0.01412	7.809	0.0180817		0.0040898
Sample	Transgene	Antibody	Replicate	Target	Sample Qty (SDM)	Input Qty (SDM, 1/10 volume)	Input %	Mean input %	SE	t-value	P-value
YFP-TIP2	TG	GFP	Replicate1, PCR1	Ubq-control	0.002281	9.423	0.00242067	0.00348561	0.00125484
			Replicate2, PCR1		0.003526	4.241	0.00831408		0.00125484
			Replicate3, PCR1		0.006137	10.75	0.00570884		0.00125484
			Replicate1, PCR2		8.031e-06	8.574	9.36669e-06		0.00125484
			Replicate2, PCR2		0.002813	5.133	0.00548023		0.00125484
			Replicate3, PCR2		0.01199	13	0.00922308		0.00125484
			Replicate1, PCR3		0.0001783	8.322	0.000214251		0.00125484
			Replicate2, PCR3		0	4.983	0		0.00125484
			Replicate3, PCR3		0	14.21	0		0.00125484
		IgG	Replicate1, PCR1		0.00208	9.423	0.00220736	0.000691109	0.000356316	2.43585	0.0299998
			Replicate2, PCR1		9.549e-06	4.241	2.25159e-05		0.000356316
			Replicate1, PCR2		0.000548	8.574	0.000639142		0.000356316
			Replicate2, PCR2		6.316e-07	5.133	1.23047e-06		0.000356316
			Replicate1, PCR3		0.0009787	8.322	0.00117604		0.000356316
			Replicate2, PCR3		5.001e-05	4.983	0.000100361		0.000356316
	non-TG	GFP	Replicate1, PCR1		0.00405	15.25	0.00265574	0.0032622	0.000697817	0.797509	0.43948
			Replicate2, PCR1		0.0009423	13.37	0.000704787		0.000697817
			Replicate1, PCR2		0.005175	15.89	0.00325677		0.000697817
			Replicate2, PCR2		0.009521	17.9	0.00531899		0.000697817
			Replicate1, PCR3		0.007674	15.31	0.00501241		0.000697817
			Replicate2, PCR3		0.00411	15.66	0.00262452		0.000697817
		IgG	Replicate1, PCR1		8.649e-05	15.25	5.67148e-05	0.000782008	0.000386329	2.36827	0.034046
			Replicate2, PCR1		0.002066	13.37	0.00154525		0.000386329
			Replicate1, PCR2		4.643e-05	15.89	2.92196e-05		0.000386329
			Replicate2, PCR2		0.004049	17.9	0.00226201		0.000386329
			Replicate1, PCR3		0	15.31	0		0.000386329
			Replicate2, PCR3		0.001251	15.66	0.000798851		0.000386329
Fig 5G
Sample	Transgene	Antibody	Replicate	Target	Sample Qty (SDM)	Input Qty (SDM, 1/10 volume)	Input %	Mean input %	SE	t-value	P-value
YFP-TIP2	TG	GFP	Replicate1, PCR1	DCL3b-Ebox3	0.04949	8.774	0.0564053	0.0622471	0.00939364
			Replicate2, PCR1		0.04875	8.325	0.0585586		0.00939364
			Replicate3, PCR1		0.1192	12.4	0.096129		0.00939364
			Replicate1, PCR2		0.06225	10.43	0.0596836		0.00939364
			Replicate2, PCR2		0.1146	9.663	0.118597		0.00939364
			Replicate3, PCR2		0.08445	15.17	0.0556691		0.00939364
			Replicate1, PCR3		0.02313	7.683	0.0301054		0.00939364
			Replicate2, PCR3		0.0209	6.021	0.0347118		0.00939364
			Replicate3, PCR3		0.0622	12.35	0.0503644		0.00939364
		IgG	Replicate1, PCR1		0.01006	8.774	0.0114657	0.023131	0.00927465	3.29956	0.00575261
			Replicate2, PCR1		0.01232	8.325	0.0147988		0.00927465
			Replicate1, PCR2		0.01006	10.43	0.00964525		0.00927465
			Replicate2, PCR2		0.02462	9.663	0.0254786		0.00927465
			Replicate1, PCR3		6.476	7.683	0.00951842		0.00927465
			Replicate2, PCR3		6.343	6.021	0.0678791		0.00927465
	non-TG	GFP	Replicate1, PCR1		0.02881	20.36	0.0141503	0.0187807	0.00467836	4.36326	0.000767954
			Replicate2, PCR1		0.02149	20.82	0.0103218		0.00467836
			Replicate1, PCR2		0.07532	18.71	0.0402565		0.00467836
			Replicate2, PCR2		0.04225	19.56	0.0216002		0.00467836
			Replicate1, PCR3		0.01274	13.85	0.00919856		0.00467836
			Replicate2, PCR3		0.02685	15.65	0.0171565		0.00467836
		IgG	Replicate1, PCR1		0.0116	20.36	0.00569745	0.0135297	0.00508358	4.80461	0.000343987
			Replicate2, PCR1		0.04421	20.82	0.0212344		0.00508358
			Replicate1, PCR2		0.01747	18.71	0.00933725		0.00508358
			Replicate2, PCR2		0.06935	19.56	0.035455		0.00508358
			Replicate1, PCR3		0.005428	13.85	0.00391913		0.00508358
			Replicate2, PCR3		0.008662	15.65	0.00553482		0.00508358
Sample	Transgene	Antibody	Replicate	Target	Sample Qty (SDM)	Input Qty (SDM, 1/10 volume)	Input %	Mean input %	SE	t-value	P-value
YFP-TIP2	TG	GFP	Replicate1, PCR1	DCL3b-Ebox2	0.02406	10.4	0.0231346	0.0431364	0.00601743
			Replicate2, PCR1		0.02914	8.701	0.0646248		0.00601743
			Replicate3, PCR1		0.05623	13.78	0.0211466		0.00601743
			Replicate1, PCR2		0.0386	7.222	0.0534478		0.00601743
			Replicate2, PCR2		0.02782	5.769	0.0482233		0.00601743
			Replicate3, PCR2		0.0468	10.68	0.0438202		0.00601743
			Replicate1, PCR3		PCR error	8.649	-		0.00601743
			Replicate2, PCR3		0.04776	7.731	0.0617773		0.00601743
			Replicate3, PCR3		0.03389	11.72	0.0289164		0.00601743
		IgG	Replicate1, PCR1		8.536e-05	10.4	8.20769e-05	0.00196435	0.00105185	5.49586	0.000102868
			Replicate2, PCR1		4.177e-05	8.701	4.8006e-05		0.00105185
			Replicate1, PCR2		0.0002616	7.222	0.000362227		0.00105185
			Replicate2, PCR2		0.003302	5.769	0.0057237		0.00105185
			Replicate1, PCR3		0.004131	8.649	0.00477627		0.00105185
			Replicate2, PCR3		0.0006137	7.731	0.000793817		0.00105185
	non-TG	GFP	Replicate1, PCR1		0.0163	16.58	0.00983112	0.010673	0.00193433	4.74575	0.000382345
			Replicate2, PCR1		0.02201	18.6	0.0118333		0.00193433
			Replicate1, PCR2		0.003077	13.29	0.00231527		0.00193433
			Replicate2, PCR2		0.01633	15.21	0.0107364		0.00193433
			Replicate1, PCR3		0.01752	13.91	0.0125953		0.00193433
			Replicate2, PCR3		0.02708	16.19	0.0167264		0.00193433
		IgG	Replicate1, PCR1		0	16.58	0	0.00338305	0.00166335	5.47988	0.000105701
			Replicate2, PCR1		0.01794	18.6	0.00964516		0.00166335
			Replicate1, PCR2		8.84e-05	13.29	6.65162e-05		0.00166335
			Replicate2, PCR2		0.009834	15.21	0.00646548		0.00166335
			Replicate1, PCR3		2.502e-05	13.91	1.79871e-05		0.00166335
			Replicate2, PCR3		0.006643	16.19	0.00410315		0.00166335
Sample	Transgene	Antibody	Replicate	Target	Sample Qty (SDM)	Input Qty (SDM, 1/10 volume)	Input %	Mean input %	SE	t-value	P-value
YFP-TIP2	TG	GFP	Replicate1, PCR1	DCL3b-Ebox1	0.01343	8.546	0.015715	0.0343073	0.00779918
			Replicate2, PCR1		0.05013	6.29	0.0796979		0.00779918
			Replicate3, PCR1		0.01133	11.84	0.00956926		0.00779918
			Replicate1, PCR2		0.03913	8.218	0.047615		0.00779918
			Replicate2, PCR2		0.0326	6.584	0.049514		0.00779918
			Replicate3, PCR2		0.0153	12.8	0.0119531		0.00779918
			Replicate1, PCR3		0.01947	6.693	0.0290901		0.00779918
			Replicate2, PCR3		0.0256	5.409	0.0473285		0.00779918
			Replicate3, PCR3		0.01874	10.25	0.0182829		0.00779918
		IgG	Replicate1, PCR1		0.01633	8.546	0.0191084	0.0287088	0.00785252	1.05427	0.310962
			Replicate2, PCR1		0.01591	6.29	0.0252941		0.00785252
			Replicate1, PCR2		0.01433	0.03324	0.0174373		0.00785252
			Replicate2, PCR2		0.03324	6.584	0.050486		0.00785252
			Replicate1, PCR3		0.004064	6.693	0.00607202		0.00785252
			Replicate2, PCR3		0.02913	5.409	0.0538547		0.00785252
	non-TG	GFP	Replicate1, PCR1		0.02561	16.51	0.0155118	0.00781205	0.00190305	3.40896	0.0046614
			Replicate2, PCR1		0.0109	17.17	0.00634828		0.00190305
			Replicate1, PCR2		0.02161	18.93	0.0114157		0.00190305
			Replicate2, PCR2		0.007418	19.18	0.00386757		0.00190305
			Replicate1, PCR3		0.007757	19.11	0.00405913		0.00190305
			Replicate2, PCR3		0.01109	19.56	0.00566973		0.00190305
		IgG	Replicate1, PCR1		0.01055	16.51	0.00639007	0.0070388	0.00171541	3.48845	0.00400172
			Replicate2, PCR1		0.01266	17.17	0.00737333		0.00171541
			Replicate1, PCR2		0.008127	18.93	0.00429319		0.00171541
			Replicate2, PCR2		0.01111	19.18	0.00579249		0.00171541
			Replicate1, PCR3		0.00631	19.11	0.00330194		0.00171541
			Replicate2, PCR3		0.0295	19.56	0.0150818		0.00171541
	PCR error : Amplification curve was not generated

## Sheet: Fig 6
	Fig 6B
	Reporter	Effector1	Effector2	Replicates	Raw luminescenece intensity		Rerative Luciferase activity
					FLuc	RLuc (internal control)	FLuc/RLuc	Mean	SD	Fold change	t-value	P value
	chr5-20pro-FLuc	-	-	rep1	38	579068	6.56227e-05	6.73975e-05	9.07242e-06	1
				rep2	24	404424	5.93437e-05
				rep3	36	466163	7.72262e-05
		EAT1	-	rep1	31	331385	9.35468e-05	9.56558e-05	4.17855e-06	1.41928	4.68034	0.00944532
				rep2	29	311989	9.2952e-05
				rep3	38	378228	0.000100469
		EAT1	TIP2	rep1	12	266444	4.50376e-05	8.68654e-05	4.22584e-05	1.28885	1.32607	0.255468
				rep2	46	355098	0.000129542
				rep3	24	279015	8.60169e-05
		EAT1	TDR	rep1	50	394723	0.000126671	0.000124753	2.53378e-06	1.851	6.65874	0.00264211
				rep2	26	213324	0.00012188
				rep3	38	302292	0.000125706
		EAT1	UDT1	rep1	87	290061	0.000299937	0.000300329	2.73135e-05	4.45608	8.42238	0.00108808
				rep2	65	198270	0.000327836
				rep3	34	124445	0.000273213
		TIP2	-	rep1	24	257192	9.33155e-05	9.87246e-05	6.76496e-06	1.46481	5.51849	0.00526397
				rep2	26	269295	9.65484e-05
				rep3	34	319820	0.00010631
		TIP2	TDR	rep1	36	278474	0.000129276	0.000170108	4.68914e-05	2.52395	3.32992	0.0291079
				rep2	50	313032	0.000159728
				rep3	31	140069	0.000221319
		TIP2	UDT1	rep1	77	172613	0.000446085	0.000581553	0.000138605	8.6287	4.42229	0.0114905
				rep2	144	199144	0.000723095
				rep3	103	178981	0.00057548
		TDR	-	rep1	10	158599	6.30521e-05	9.32452e-05	4.21027e-05	1.38351	1.53375	0.199872
				rep2	19	252180	7.5343e-05
				rep3	36	254704	0.000141341
		TDR	UDT1	rep1	26	242692	0.000107132	9.71024e-05	2.83724e-05	1.44074	2.11111	0.102362
				rep2	14	215128	6.50775e-05
				rep3	29	243497	0.000119098
		UDT1	-	rep1	17	276566	6.14681e-05	0.000161222	9.19065e-05	2.39211	2.05502	0.109066
				rep2	34	140228	0.000242462
				rep3	41	228112	0.000179736
	Reporter	Effector1	Effector2	Replicates	Raw luminescenece intensity		Rerative Luciferase activity
					FLuc	RLuc (internal control)	FLuc/RLuc	Mean	SD	Fold change	t-value	P value (t-test)
	chr6-97pro-FLuc	-	-	rep1	36	1181688	3.04649e-05	3.37207e-05	4.63182e-06	1
				rep2	31	978725	3.16739e-05
				rep3	34	871274	3.90233e-05
		EAT1	-	rep1	48	949116	5.05734e-05	4.21824e-05	8.11593e-06	1.25093	2.0896	0.104878
				rep2	36	1047340	3.43728e-05
				rep3	43	1033630	4.1601e-05
		EAT1	TIP2	rep1	22	448779	4.90219e-05	5.9446e-05	2.61763e-05	1.76289	2.01482	0.114169
				rep2	22	548797	4.00877e-05
				rep3	43	481909	8.92285e-05
		EAT1	TDR	rep1	60	1110916	5.40095e-05	7.34568e-05	1.68429e-05	2.17839	3.57464	0.0232788
				rep2	75	903728	8.29896e-05
				rep3	79	947568	8.33713e-05
		EAT1	UDT1	rep1	120	859604	0.000139599	0.000134594	8.05843e-06	3.99145	15.1113	0.000111781
				rep2	101	806076	0.000125298
				rep3	127	914423	0.000138885
		TIP2	-	rep1	48	429154	0.000111848	7.56521e-05	3.14253e-05	2.24349	2.42809	0.0721298
				rep2	29	524113	5.53316e-05
				rep3	29	485139	5.97767e-05
		TIP2	TDR	rep1	70	746159	9.38138e-05	9.01769e-05	1.5756e-05	2.67423	4.7168	0.00919333
				rep2	75	722568	0.000103796
				rep3	38	521116	7.29204e-05
		TIP2	UDT1	rep1	36	460300	7.82099e-05	9.23777e-05	1.26754e-05	2.7395	5.83493	0.00429949
				rep2	60	623179	9.62805e-05
				rep3	65	633264	0.000102643
		TDR	-	rep1	67	1328190	5.04446e-05	4.01447e-05	9.33209e-06	1.19051	1.6096	0.182771
				rep2	36	1116204	3.22522e-05
				rep3	41	1086460	3.77372e-05
		TDR	UDT1	rep1	34	1011434	3.36156e-05	3.94639e-05	9.18578e-06	1.17032	1.52087	0.202934
				rep2	38	1094321	3.47247e-05
				rep3	48	959014	5.00514e-05
		UDT1	-	rep1	29	652469	4.44466e-05	4.39506e-05	7.42642e-06	1.30337	2.55132	0.0632166
				rep2	34	665145	5.11167e-05
				rep3	24	661363	3.62887e-05
	Reporter	Effector1	Effector2	Replicates	Raw luminescenece intensity		Rerative Luciferase activity
					FLuc	RLuc (internal control)	FLuc/RLuc	Mean	SD	Fold change	t-value	P value (t-test)
	DCL5pro-FLuc	-	-	rep1	31	409264	7.57457e-05	4.78257e-05	2.42996e-05	1
				rep2	41	1303535	3.14529e-05
				rep3	38	1047457	3.62783e-05
		EAT1	-	rep1	29	542464	5.34598e-05	6.41241e-05	2.11197e-05	1.34079	1.47008	0.215488
				rep2	22	435963	5.0463e-05
				rep3	41	463541	8.84496e-05
		EAT1	TIP2	rep1	22	400414	5.49431e-05	8.70764e-05	2.98058e-05	1.8207	2.36357	0.0773611
				rep2	41	360221	0.000113819
				rep3	31	335255	9.24669e-05
		EAT1	TDR	rep1	53	514158	0.000103081	9.34164e-05	1.65446e-05	1.95327	3.24992	0.0313782
				rep2	31	417156	7.43127e-05
				rep3	70	680568	0.000102855
		EAT1	UDT1	rep1	36	392483	9.17237e-05	9.89123e-05	3.78033e-05	2.06818	2.50772	0.0662185
				rep2	19	291324	6.52195e-05
				rep3	43	307596	0.000139794
		TIP2	-	rep1	36	611846	5.88383e-05	6.46024e-05	1.03935e-05	1.35079	1.62353	0.179798
				rep2	38	496079	7.66007e-05
				rep3	31	531111	5.83682e-05
		TIP2	TDR	rep1	31	645832	4.80001e-05	6.79759e-05	3.75223e-05	1.42133	1.36957	0.242674
				rep2	36	323566	0.00011126
				rep3	12	268652	4.46675e-05
		TIP2	UDT1	rep1	22	101533	0.000216678	0.000234968	1.58717e-05	4.91301	10.9264	0.000398443
				rep2	29	118307	0.000245125
				rep3	31	127519	0.000243101
		TDR	-	rep1	31	581114	5.33458e-05	8.50564e-05	2.74669e-05	1.77847	2.36448	0.0772841
				rep2	67	667332	0.0001004
				rep3	53	522561	0.000101424
		TDR	UDT1	rep1	14	318726	4.39249e-05	7.60353e-05	2.80348e-05	1.58984	1.90314	0.129768
				rep2	31	350143	8.85353e-05
				rep3	36	376389	9.56457e-05
		UDT1	-	rep1	26	229803	0.00011314	0.000100001	1.46867e-05	2.09094	3.63843	0.0219952
				rep2	19	225798	8.4146e-05
				rep3	26	253125	0.000102716

## Sheet: Fig 7 & S12 (1)
Fig 7 Unique 24-nt masiRNAs
masiRNA ID	Sequence (5'-3')	Position					overlap		Number of reads in MEL1-RIP-seq (in each sample)
									WT							mel1							eat1-4
		chromosome	from	to	direction				ST.1_1	ST.1_2	ST.2_1	ST.2_2	ST.4_1	ST.4_2		ST.1_1	ST.1_2	ST.2_1	ST.2_2	ST.4_1	ST.4_2		ST.1_1	ST.1_2	ST.2_1	ST.2_2	ST.4_1	ST.4_2
masiRNA_u_0001	CUUACAUAUGGGGUCUAUAGAAAA	Chr1	1036669	1036692	+		intergenic		2	7	3	4	3	9		0	0	0	0	0	0		8	8	8	0	3	3
masiRNA_u_0002	CAGAGUUCAAUUGUGGAUACAGAU	Chr1	1340143	1340166	+		intergenic		2	1	2	5	4	6		0	0	0	1	0	0		2	3	3	0	3	2
masiRNA_u_0003	CUAUAGCGGGCUAAAUGGAGCUAU	Chr1	1971812	1971835	+		repeat		4	9	5	4	7	6		0	3	0	1	0	0		6	4	5	4	1	5
masiRNA_u_0004	CUAUCACAUGUAGACUCUUAUGUG	Chr1	2501800	2501823	+		repeat		3	3	2	0	4	6		0	0	0	0	0	0		3	10	2	3	0	2
masiRNA_u_0005	CUAUUACAUCGUGAUUCUUUAGAG	Chr1	2556638	2556661	+		intergenic		1	4	4	11	8	21		0	0	0	0	0	0		6	10	19	16	11	18
masiRNA_u_0006	CAACUAUAAGUUUCUGUGCUCAAC	Chr1	2799868	2799891	+		repeat		4	13	9	4	10	8		0	0	0	0	0	0		13	12	9	6	2	6
masiRNA_u_0007	CUUCUAAUUUUGACGUGAACUAAA	Chr1	3085494	3085517	+		repeat		4	20	7	12	11	30		1	1	0	0	0	0		20	35	15	17	12	8
masiRNA_u_0008	CUUCCAACAUUUGGUCGGACGUCU	Chr1	4152904	4152927	+		repeat		3	11	4	1	3	7		0	0	0	0	0	0		6	6	2	5	3	3
masiRNA_u_0009	CUUUCAAUUUUGGCGUGAACUAAA	Chr1	4429553	4429576	+		repeat		14	26	15	19	12	32		0	1	0	0	0	0		28	26	23	16	10	15
masiRNA_u_0010	CAGUGACUAGACGACUACUUCCAU	Chr1	4513695	4513718	+		intergenic		4	7	4	8	4	9		0	0	2	0	0	0		4	3	5	2	4	3
masiRNA_u_0011	CUAAAUUAGAGUAGUAGGACUAAG	Chr1	4617076	4617099	+		intergenic		3	8	4	3	8	6		0	0	0	0	0	0		8	8	7	6	5	6
masiRNA_u_0012	CUUUACCAUUGCGGGUGCUCUAAU	Chr1	4667982	4668005	+		repeat		4	13	3	5	3	10		0	0	0	0	0	0		10	9	7	6	3	3
masiRNA_u_0013	CGACGUGACACAUACUACUACAAU	Chr1	5792672	5792695	+		repeat		8	6	8	12	2	8		0	0	0	0	0	0		6	4	5	3	1	2
masiRNA_u_0014	CUAUUACUACGAAUCUGGACAAGC	Chr1	7732234	7732257	+		repeat		12	6	11	7	11	7		0	0	0	0	0	0		11	8	5	3	3	3
masiRNA_u_0015	CGACCCAAAAUAGAACUAGAUGAU	Chr1	7916551	7916574	+		repeat		12	25	13	13	1	12		0	0	1	0	0	0		26	15	20	6	11	11
masiRNA_u_0016	CGAUUCUUUGUAGAUGAGCACAAC	Chr1	9042008	9042031	+		gene		1	3	3	6	3	10		0	0	0	0	0	0		5	0	2	2	6	3
masiRNA_u_0017	CUAACACAAUCAGAUGUAGACAUG	Chr1	9042395	9042418	+		gene		4	10	12	10	20	20		0	0	0	0	0	0		4	4	12	7	6	15
masiRNA_u_0018	CUAACUGUGUCUGUGAUGCUCACC	Chr1	9438173	9438196	+		intergenic		2	2	3	5	4	7		0	0	0	0	0	0		2	1	1	5	2	1
masiRNA_u_0019	CUUUGGGUUCAAGAGCAAUGGCAG	Chr1	9438660	9438683	+		gene		1	0	0	1	6	7		0	0	0	0	0	0		0	0	1	0	0	4
masiRNA_u_0020	CAGACCAAGAACGUGUUAAGCUAC	Chr1	10261436	10261459	+		intergenic		3	8	2	6	3	11		0	0	0	0	0	0		15	9	7	4	3	4
masiRNA_u_0021	CUACGAAUCUGUGCCUGAGGAUAU	Chr1	10534813	10534836	+		repeat		5	9	11	8	16	8		0	0	0	0	0	0		7	10	4	3	5	4
masiRNA_u_0022	CAUUUCCAUCCUGUCGUCCUCAGU	Chr1	10925273	10925296	+		intergenic		7	10	6	10	19	9		0	0	1	0	1	0		6	4	14	1	11	1
masiRNA_u_0023	CUGAGAACAGUGGAGUCUAGCGGG	Chr1	11197688	11197711	+		intergenic		2	1	4	1	5	12		0	0	0	1	1	0		2	4	3	2	6	4
masiRNA_u_0024	CGAAAAUUGAUUUUGCUCUCUGGU	Chr1	11358533	11358556	+		repeat		17	49	6	20	1	9		0	1	1	2	0	1		40	20	29	9	8	7
masiRNA_u_0025	CAAAUCAAGGUUGUAGGCUCCAUU	Chr1	11358981	11359004	+		gene		55	106	43	39	11	42		0	2	2	0	0	0		89	61	44	36	16	33
masiRNA_u_0026	CAACGUGUGAUAUUUUGAUUAAGA	Chr1	11362574	11362597	+		intergenic		2	2	5	1	5	5		0	0	0	0	0	0		2	1	1	2	2	2
masiRNA_u_0027	CAAUCGAUCGAUCUCUCCUGAGCU	Chr1	11362674	11362697	+		intergenic		14	11	22	29	32	61		0	0	0	0	0	0		18	20	29	11	32	19
masiRNA_u_0028	CAAAUGACUGAUCUUGUGCACUAU	Chr1	11362815	11362838	+		intergenic		3	9	7	10	21	28		0	0	0	0	0	0		11	13	13	16	12	23
masiRNA_u_0029	CAAGGAUUUAAAUAGGUGGGCUAU	Chr1	11469437	11469460	+		intergenic		20	27	7	7	5	5		1	0	0	0	0	0		13	16	10	2	5	4
masiRNA_u_0030	CACGAGCGUGUAGAAGGUAAAGAG	Chr1	14339186	14339209	+		intergenic		5	2	5	5	9	7		0	0	0	0	0	0		3	4	1	2	5	2
masiRNA_u_0031	CAAAAAUCUGAUGUGGCAAGUGAA	Chr1	17795144	17795167	+		repeat		5	8	0	7	4	16		0	0	0	0	0	0		13	7	8	3	7	14
masiRNA_u_0032	CUGAACUUUCAAUACCGGACGAAU	Chr1	21444547	21444570	+		repeat		4	12	5	8	6	5		0	0	0	0	0	0		16	9	10	5	5	1
masiRNA_u_0033	CAACUAAACAAGGCCUGAACUAAG	Chr1	22249196	22249219	+		repeat		37	52	21	27	9	27		0	0	0	0	0	0		47	32	23	30	6	10
masiRNA_u_0034	CAUCCAACCGGUAAUAGAUACGAA	Chr1	22249396	22249419	+		repeat		9	32	19	18	3	16		3	5	5	3	2	1		14	28	28	14	7	12
masiRNA_u_0035	CUUUUUUAAGUCGUUGGUUAAAUU	Chr1	22873633	22873656	+		intergenic		2	6	3	3	9	4		0	0	0	0	0	0		11	5	5	5	3	3
masiRNA_u_0036	CGGCCAUUUGUAGAACAAGAAACG	Chr1	23150917	23150940	+		intergenic		62	96	15	24	2	17		0	1	0	0	0	1		75	63	38	23	12	14
masiRNA_u_0037	CAUUUGUAGAACAAGAAACGCGAG	Chr1	23150921	23150944	+		intergenic		26	100	19	25	3	21		1	4	1	3	0	1		85	45	43	47	4	12
masiRNA_u_0038	CUUCCCACAUGAAUUUCUGACAAG	Chr1	23151132	23151155	+		intergenic		39	55	21	19	13	17		2	1	0	0	0	0		48	18	18	9	8	8
masiRNA_u_0039	CGAGAAAACGUGGAACUGCUCUAG	Chr1	25689782	25689805	+		repeat		9	17	4	7	9	6		0	0	1	0	0	0		8	5	8	3	6	1
masiRNA_u_0040	CUAGGAUAAAAAAAAUAAUGUGGC	Chr1	26648307	26648330	+		repeat		10	9	7	11	13	8		0	0	0	0	0	0		6	8	12	5	1	4
masiRNA_u_0041	CUAAAUAUAGGGACUAAAGUUAAG	Chr1	28071057	28071080	+		repeat		1	2	2	1	5	5		0	0	0	0	0	0		5	1	6	0	1	1
masiRNA_u_0042	CUAGACGACCAUAUCUGACGUGGU	Chr1	28200677	28200700	+		intergenic		1	0	3	4	0	14		0	0	0	0	0	1		3	7	2	4	4	9
masiRNA_u_0043	CAUAUCGACUGCAUUGCUCACUGC	Chr1	28200793	28200816	+		intergenic		8	3	12	3	9	2		0	0	0	0	0	0		3	1	2	1	2	0
masiRNA_u_0044	CUAUUUGUUUUAAUGUAUGUGCUC	Chr1	28200967	28200990	+		intergenic		0	2	1	11	9	14		0	0	1	0	0	0		1	3	12	8	4	15
masiRNA_u_0045	CUAUCAAUAUUUGUUAGCGCUCUU	Chr1	28201092	28201115	+		intergenic		0	5	1	7	5	6		0	0	0	0	0	0		4	2	3	10	3	8
masiRNA_u_0046	CGAUUUCUCGUGCAAAGGACUAGA	Chr1	28201199	28201222	+		intergenic		0	2	3	1	5	9		0	0	0	0	0	0		2	0	3	1	2	6
masiRNA_u_0047	CAACCGCACGACACCUGAAUGACG	Chr1	28201945	28201968	+		intergenic		2	3	1	1	9	4		0	0	0	0	0	0		5	2	2	1	3	3
masiRNA_u_0048	CAUAAUUGACGUGGUGCUAUCGAU	Chr1	28202850	28202873	+		intergenic		1	2	5	3	6	8		0	0	0	0	0	0		0	2	2	2	4	5
masiRNA_u_0049	CUACGGCUUCUUGCAUCUCAGAUU	Chr1	28202914	28202937	+		intergenic		3	6	12	7	11	12		0	0	0	0	0	0		5	3	4	5	13	15
masiRNA_u_0050	CAUGAUUUAUUGAUUAGGACUAAG	Chr1	28204425	28204448	+		intergenic		1	2	3	6	4	7		0	0	0	0	0	0		4	2	2	0	3	7
masiRNA_u_0051	CAGAGAAAAAAGGAGUAGAUCGAC	Chr1	28212932	28212955	+		intergenic		6	1	3	6	7	8		0	0	0	0	0	0		4	2	2	3	3	7
masiRNA_u_0052	CUUAAACGUGACGACGAGCAACCC	Chr1	28213701	28213724	+		intergenic		1	1	3	4	3	12		0	0	0	0	0	0		7	6	3	0	1	5
masiRNA_u_0053	CUAUAACUCUAUAACUCUAUCUAG	Chr1	28465743	28465766	+		intergenic		7	11	11	8	5	9		0	0	0	0	0	0		9	12	6	9	4	3
masiRNA_u_0054	CGACUAUAAAACUGGAUAUAUGAU	Chr1	29171114	29171137	+		repeat		1	1	3	3	2	9		0	0	0	0	0	0		1	3	1	1	2	2
masiRNA_u_0055	CUAGUUAUUGGAGUAGAGUAAGAG	Chr1	29902300	29902323	+		repeat		4	1	1	0	3	7		0	0	0	0	0	0		6	1	2	0	2	3
masiRNA_u_0056	CUUUAUCAACAGUACUGUAGACAU	Chr1	32218952	32218975	+		intergenic		4	39	5	21	2	16		0	2	0	0	0	0		14	18	16	19	10	12
masiRNA_u_0057	CAUACCAUCUAGGACAGAUACGAU	Chr1	32380940	32380963	+		repeat		2	2	5	5	1	9		0	0	0	0	0	0		9	10	6	3	2	4
masiRNA_u_0058	CUUUGAAUCGCAGGGUAGAAAAAA	Chr1	34175210	34175233	+		repeat		5	9	3	6	5	9		0	0	0	0	0	0		21	9	10	6	12	5
masiRNA_u_0059	CUAAAAACCGUGGCAUGACUGAAG	Chr1	34852105	34852128	+		repeat		2	15	2	7	4	9		1	0	0	0	0	0		11	5	7	4	6	10
masiRNA_u_0060	CUAUUACUAUGAAUCUGGACAGAG	Chr1	36453646	36453669	+		repeat		7	15	4	14	5	12		0	0	0	0	0	1		12	9	17	8	8	14
masiRNA_u_0061	CAGACGGUCCUUAAACUUAUAGAG	Chr1	38572715	38572738	+		repeat		15	8	8	4	9	2		0	0	1	0	0	0		9	7	8	3	3	4
masiRNA_u_0062	CUAGUUAAUAUAGAGACUGAAGAU	Chr1	38899917	38899940	+		intergenic		2	8	1	18	1	15		0	0	0	0	0	0		32	74	36	51	13	40
masiRNA_u_0063	CGGUCUUCAAGAUGCUACUUUGAU	Chr1	39250439	39250462	+		repeat		1	2	2	0	2	8		0	0	0	0	0	0		1	4	4	3	1	3
masiRNA_u_0064	CAUAUUUUCGGAGUUGCUAGAAAU	Chr1	39419554	39419577	+		intergenic		3	5	2	2	5	7		0	0	0	0	0	0		8	3	1	2	1	4
masiRNA_u_0065	CUAGAAUACCAUUCUGAACUGAGU	Chr1	39976221	39976244	+		repeat		6	20	10	8	5	7		0	0	0	0	0	0		11	10	15	10	4	6
masiRNA_u_0066	CUAUAUGUUGAAUUGUAUGACGUG	Chr1	40053351	40053374	+		intergenic		6	4	3	6	6	4		0	1	0	0	0	0		3	7	0	3	1	0
masiRNA_u_0067	CUUUUUGUAAAAAUGAUAGACCAG	Chr1	41502959	41502982	+		intergenic		8	3	5	4	5	8		0	0	0	0	0	0		7	5	2	9	0	5
masiRNA_u_0068	CUUACCGAAAAUGACUAAACCGAG	Chr1	42287271	42287294	+		intergenic		4	17	5	10	4	8		0	1	1	0	0	0		11	8	10	10	3	15
masiRNA_u_0069	CCACAAGAUGGUGAACGAGACGAU	Chr1	1965599	1965622	+		repeat		3	9	7	5	1	8		0	0	0	0	0	0		6	5	3	7	3	2
masiRNA_u_0070	CAAGAGUCGAAUGUGCCUGUGAUG	Chr1	9438326	9438349	+		intergenic		3	7	5	7	3	3		0	0	0	0	0	0		9	2	4	2	4	9
masiRNA_u_0071	CCAACGUGUGAUAUUUUGAUUAAG	Chr1	11362573	11362596	+		intergenic		0	2	3	7	2	2		0	0	0	0	0	0		1	0	0	2	0	0
masiRNA_u_0072	CUAUCUAUGACAUGUGGGCCUCAU	Chr1	13886707	13886730	+		repeat		17	17	6	4	2	5		0	0	0	0	0	0		9	5	0	3	4	1
masiRNA_u_0073	CUAUGUGGGAAAUAUUUUGACAGU	Chr1	14337520	14337543	+		intergenic		0	2	10	2	2	5		0	0	0	0	0	0		0	3	0	3	4	4
masiRNA_u_0074	CUAGUUCAUGUAAACGUUGCACAC	Chr1	14338191	14338214	+		intergenic		0	1	4	6	1	7		0	0	0	0	0	0		1	1	5	3	5	5
masiRNA_u_0075	CAUGGAUAUCUAUAGCUCUCUAAU	Chr1	17969806	17969829	+		repeat		2	6	4	8	4	4		0	0	0	0	0	0		9	4	3	3	0	3
masiRNA_u_0076	CACAAUCUAAAGGAGUGGACCAAG	Chr1	22248275	22248298	+		repeat		6	26	4	8	3	2		0	0	0	0	0	0		28	9	5	7	4	5
masiRNA_u_0077	CAUGAAUUUCUGACAAGACUGCAG	Chr1	23151139	23151162	+		intergenic		7	26	5	7	4	5		0	0	0	2	0	0		15	22	16	8	2	4
masiRNA_u_0078	CUAGUACUAUGAAUCUGACAGACU	Chr1	23416318	23416341	+		repeat		2	11	11	6	4	4		0	0	0	0	0	0		6	13	2	3	3	5
masiRNA_u_0079	CUUCCUGAACUGUUAAAUGGUAAU	Chr1	25509421	25509444	+		repeat		1	4	2	9	2	4		0	0	0	0	0	0		2	5	1	2	3	1
masiRNA_u_0080	CUUGGACAUAAGAACCUCUGUGAG	Chr1	25983338	25983361	+		repeat		2	6	2	12	1	1		0	0	0	0	0	0		7	4	4	7	1	2
masiRNA_u_0081	CUUUCAUAUGAAGAACUUUUACGG	Chr1	29594681	29594704	+		intergenic		2	15	4	6	0	7		0	0	0	1	0	0		7	16	7	3	1	6
masiRNA_u_0082	CUAGAUUCAUUGUACUGAAAGACU	Chr1	40193954	40193977	+		repeat		1	3	3	7	1	5		0	1	0	0	0	0		3	12	3	2	1	2
masiRNA_u_0083	CAUCAAAUAUUUGGACGUAUACAU	Chr1	2173311	2173334	+		repeat		3	8	2	2	3	6		0	0	0	0	0	0		8	9	8	11	0	4
masiRNA_u_0084	CAUAGGAUCAUAGAGGGAAUGUGU	Chr1	2459221	2459244	+		repeat		13	7	2	4	2	5		0	0	0	0	0	0		3	5	3	4	4	1
masiRNA_u_0085	CAACCGUCCGAUCCAUGCACAGAU	Chr1	3887695	3887718	+		gene		9	5	0	2	1	3		0	0	0	0	0	0		4	6	1	0	1	0
masiRNA_u_0086	CUCAGUCCUGGAAUAUGUAACAAU	Chr1	4533539	4533562	+		intergenic		5	6	5	3	0	4		0	0	0	0	0	0		11	4	7	7	0	1
masiRNA_u_0087	CAAGACAGUGUGUGUAUGACAAGU	Chr1	6819212	6819235	+		repeat		13	4	3	1	2	0		0	0	0	0	0	0		2	1	1	0	0	2
masiRNA_u_0088	CUAGCGAAGAUUUAGCGGACGGGU	Chr1	7242317	7242340	+		intergenic		6	5	1	1	3	3		0	0	0	0	0	1		2	4	0	1	0	1
masiRNA_u_0089	CUUGAAGACUGUGUAAUAAAAAAU	Chr1	7259403	7259426	+		repeat		0	12	0	3	1	4		0	0	0	0	0	0		7	2	4	2	2	2
masiRNA_u_0090	CUAAAUGAUAAAAUUGGUGUGCUC	Chr1	7487424	7487447	+		intergenic		13	12	3	2	2	0		0	0	0	0	0	0		10	8	2	2	0	0
masiRNA_u_0091	CUGACGAACGUGGUGCCUGACAUG	Chr1	8311436	8311459	+		intergenic		12	14	2	2	0	2		0	0	0	0	0	1		4	4	1	2	1	1
masiRNA_u_0092	CUACCGUUCGUUAAAGAGACAUGU	Chr1	9928551	9928574	+		intergenic		10	7	8	1	3	2		0	0	0	0	0	0		14	1	4	4	1	1
masiRNA_u_0093	CAAUCUCGUGUAUACCCUGACACC	Chr1	10147590	10147613	+		repeat		9	2	1	1	5	4		0	0	0	0	0	0		2	4	2	0	2	0
masiRNA_u_0094	CUAAACUAACCCCUACGUAGACUG	Chr1	11534490	11534513	+		repeat		7	5	2	1	0	0		0	1	0	0	0	0		2	3	0	0	0	0
masiRNA_u_0095	CUAACCCCUACGUAGACUGUGAUG	Chr1	11534495	11534518	+		repeat		9	7	1	0	0	2		0	0	0	0	0	0		8	4	2	2	1	0
masiRNA_u_0096	CAUGAGAAUGAUGUGUGGAUGUGU	Chr1	13393596	13393619	+		repeat		5	5	1	1	1	1		0	0	0	0	0	0		2	2	1	0	0	1
masiRNA_u_0097	CAAAGUCGUGGAGAGAACAAAAAU	Chr1	14467456	14467479	+		intergenic		4	7	0	2	0	0		0	0	0	0	0	0		2	4	2	0	3	2
masiRNA_u_0098	CUUUAAAAUAUAGAUGGGACGGAG	Chr1	18662608	18662631	+		gene		5	10	2	0	4	2		0	1	0	0	0	0		3	3	3	3	3	1
masiRNA_u_0099	CUAAUAUAACGAAUCUGAACAAGC	Chr1	20064527	20064550	+		repeat		8	2	4	3	0	1		0	0	0	0	0	0		4	0	0	2	0	1
masiRNA_u_0100	CUUAGUACGGUCGUUGCCUGUGGC	Chr1	21832008	21832031	+		repeat		6	10	3	3	3	5		0	0	0	0	0	0		5	7	6	1	5	5
masiRNA_u_0101	CUUAUAUUUUAGGAUGAAGAGAGU	Chr1	22352873	22352896	+		repeat		3	7	3	0	0	1		0	0	0	0	0	0		3	3	4	1	1	1
masiRNA_u_0102	CUACAAAAUGAUGGACUAGACGAC	Chr1	22460297	22460320	+		repeat		10	11	2	4	1	2		0	0	0	0	0	0		8	4	4	3	1	2
masiRNA_u_0103	CGAGGAACCGUUGGCUGAACCACA	Chr1	22464298	22464321	+		intergenic		2	11	0	2	1	3		0	0	0	0	0	0		8	3	2	1	0	3
masiRNA_u_0104	CCACAUGAAUUUCUGACAAGACUG	Chr1	23151136	23151159	+		intergenic		11	9	4	3	1	3		0	2	0	0	0	0		3	2	2	2	0	0
masiRNA_u_0105	CAAGACUGCAGCAUAUGGAAUAGC	Chr1	23151152	23151175	+		intergenic		13	5	6	1	0	1		0	2	0	0	0	0		3	0	0	1	0	1
masiRNA_u_0106	CAACGACUCUGGCGCCCCGAUAAG	Chr1	23445444	23445467	+		repeat		8	12	4	3	3	6		0	0	0	0	0	0		6	7	4	2	2	0
masiRNA_u_0107	CGAACUCUAAGACACGGUGUGUAU	Chr1	25256796	25256819	+		repeat		4	8	3	1	0	3		0	0	0	0	0	0		7	3	6	0	2	1
masiRNA_u_0108	CAAUAUUUUUGGACCGACUUGAAG	Chr1	26778527	26778550	+		intergenic		11	31	3	1	4	5		2	2	0	0	1	0		13	8	5	1	1	4
masiRNA_u_0109	CGAUUUUCUGUGGUGUCCUUCAAC	Chr1	26827190	26827213	+		repeat		4	6	1	0	1	2		0	0	0	0	0	0		5	0	3	2	2	1
masiRNA_u_0110	CAACUAGAAACUCUCCCCAAACAG	Chr1	28661063	28661086	+		repeat		7	7	2	2	2	6		0	0	0	0	0	0		3	1	3	3	0	2
masiRNA_u_0111	CUUCGGUCUGAUAAUAUUAGUUGU	Chr1	28942603	28942626	+		repeat		4	6	3	1	3	1		0	0	0	0	0	0		0	2	4	2	2	1
masiRNA_u_0112	CAAAUCAGAGACGUAAAGAAACAU	Chr1	29056040	29056063	+		intergenic		1	11	2	2	3	1		0	0	0	0	0	0		8	9	10	6	3	1
masiRNA_u_0113	CGAGUUAUUUUACUUGGGACCUGU	Chr1	29651589	29651612	+		repeat		7	8	1	2	4	2		0	0	0	0	0	0		8	3	3	5	1	2
masiRNA_u_0114	CAAGUAAAAGACGUCGGCGGAGGC	Chr1	31936949	31936972	+		repeat		9	2	1	0	1	1		0	2	0	0	0	0		7	2	1	0	2	2
masiRNA_u_0115	CUAGGAUAUGAUGAAUCUGGACAG	Chr1	32087266	32087289	+		intergenic		1	9	0	7	2	3		0	0	0	1	0	0		11	5	3	5	3	0
masiRNA_u_0116	CAUCAGAAAAUCUAGGGAACGAAG	Chr1	32980187	32980210	+		repeat		2	8	2	4	2	2		0	0	0	0	0	0		7	0	2	1	1	1
masiRNA_u_0117	CUAUGACAUGUGGACCCUUAUGUG	Chr1	33925114	33925137	+		repeat		7	12	5	3	4	5		0	1	0	0	0	0		9	3	3	2	2	4
masiRNA_u_0118	CUAUUCUUUGAACCCGCCCCUGCU	Chr1	33926446	33926469	+		intergenic		5	5	1	4	1	2		0	0	1	0	0	0		3	0	0	0	6	2
masiRNA_u_0119	CUUUUUAUUACGGGACGGAUAGAG	Chr1	35142771	35142794	+		repeat		6	5	2	4	3	5		0	0	0	0	0	0		4	3	2	0	2	1
masiRNA_u_0120	CCAAAACUGGCGGACUGGGACGAG	Chr1	35218803	35218826	+		repeat		9	5	5	3	2	1		1	0	0	0	0	0		1	3	2	1	2	4
masiRNA_u_0121	CUAAACCUCGUGAUGUAGAAACUG	Chr2	848256	848279	+		intergenic		8	40	5	18	2	20		0	1	1	1	0	0		66	29	31	18	5	8
masiRNA_u_0122	CAUAACUAUGUAAACCGGACGAAU	Chr2	2180137	2180160	+		repeat		8	19	2	7	3	8		0	0	0	0	0	1		15	3	6	4	5	4
masiRNA_u_0123	CAUGUCGGUGUCUAUAAUAAUAAU	Chr2	3357391	3357414	+		gene		63	109	65	60	69	87		0	0	0	0	0	0		66	52	50	34	33	41
masiRNA_u_0124	CUUUUGAGUCUAUAGCAUAUGCGC	Chr2	3357570	3357593	+		gene		3	6	5	2	4	7		0	0	0	0	0	0		1	2	4	1	1	4
masiRNA_u_0125	CAUAGGACGAAAGUCGGACGACGU	Chr2	4553129	4553152	+		intergenic		8	7	9	6	6	4		0	0	0	0	0	0		1	6	3	0	1	2
masiRNA_u_0126	CGAAUUUCUGAUGAUCUUAUGUUC	Chr2	5904262	5904285	+		intergenic		0	2	3	2	8	5		0	0	0	0	0	0		2	0	2	1	2	7
masiRNA_u_0127	CCUUCCAACGUUGAACCAACUCAC	Chr2	5904630	5904653	+		intergenic		16	23	30	23	38	46		0	0	1	0	0	0		29	17	24	18	34	24
masiRNA_u_0128	CUUCCAACGUUGAACCAACUCACU	Chr2	5904631	5904654	+		intergenic		5	7	8	7	3	9		0	0	0	0	0	1		1	1	9	5	3	4
masiRNA_u_0129	CACGGACUAGCGGUUUACCCCCAU	Chr2	5905319	5905342	+		repeat		3	8	8	11	14	23		0	0	0	0	0	0		9	8	12	13	16	13
masiRNA_u_0130	CUUCAGAUCUAUCUGGCCGGCUAG	Chr2	5906504	5906527	+		intergenic		12	10	7	9	9	9		0	1	0	0	0	1		3	8	4	5	13	9
masiRNA_u_0131	CCACAUGUCGCUCAACUAAAGAAU	Chr2	5941175	5941198	+		24-PHAS		0	0	3	2	13	16		0	0	0	0	1	3		0	0	0	0	0	0
masiRNA_u_0132	GGCGUUGUUCAGUUGGCUGUAGCA	Chr2	6011183	6011206	+		intergenic		0	0	20	27	8	16		0	0	0	0	2	2		0	0	0	1	8	2
masiRNA_u_0133	CUAUUGCGUGAAGGAAGGAACAAU	Chr2	6859118	6859141	+		24-PHAS		0	0	1	0	3	11		0	0	0	0	0	0		0	0	0	0	0	0
masiRNA_u_0134	CAUGGGUGUGUACCUCUUUAUGAG	Chr2	7682758	7682781	+		gene		51	51	41	37	51	68		0	3	1	1	0	0		43	111	34	31	12	31
masiRNA_u_0135	CUAGUGACGUCUGUAAAAAUCGAG	Chr2	8230906	8230929	+		intergenic		1	3	2	2	3	8		0	0	0	0	0	0		3	5	7	1	2	4
masiRNA_u_0136	CCAAUUUAAGUAAAAAUGGACGGU	Chr2	8947684	8947707	+		repeat		9	21	12	10	6	9		0	0	1	0	0	0		10	6	3	9	1	2
masiRNA_u_0137	CAAACGACUCAAUCUGAAAUUCAG	Chr2	10358867	10358890	+		repeat		4	4	4	3	4	8		0	0	0	0	0	0		4	5	4	4	0	2
masiRNA_u_0138	CUGACUUUAUCUGACGCCGUUGAU	Chr2	10566125	10566148	+		repeat		14	42	6	10	4	20		0	0	0	0	0	0		25	23	13	6	7	11
masiRNA_u_0139	CUAUGAUUGUACAACGGUGACUAU	Chr2	12096073	12096096	+		intergenic		8	31	4	4	7	11		0	0	0	0	0	0		0	0	0	0	0	0
masiRNA_u_0140	CAAAGAAAGAAUCUGUACAACGCC	Chr2	12099297	12099320	+		intergenic		23	33	13	23	9	13		1	0	2	0	0	0		22	21	22	12	9	12
masiRNA_u_0141	CUACUGUUGAAACUUUCUUGAGGU	Chr2	13583178	13583201	+		gene		1	2	7	3	6	9		0	0	0	0	0	0		1	5	1	1	0	3
masiRNA_u_0142	CAAGGAUUUAGACAGGUUCAGGCC	Chr2	14026317	14026340	+		repeat		6	16	7	9	11	22		0	0	1	0	0	0		8	12	16	6	8	2
masiRNA_u_0143	CAAAAGACUAUAAUGACCUACAAG	Chr2	15804356	15804379	+		repeat		5	5	3	10	6	8		0	0	0	0	0	0		4	9	3	5	4	3
masiRNA_u_0144	CUGGGCAUAAGUAUGAAAGACGAU	Chr2	16038908	16038931	+		intergenic		28	59	14	24	15	12		0	14	6	2	1	3		44	30	39	13	13	18
masiRNA_u_0145	CUACGAUUUGAGAGAAAUAUUGAC	Chr2	18591332	18591355	+		repeat		3	7	1	5	4	6		0	0	0	0	0	0		9	6	11	2	0	4
masiRNA_u_0146	CAAAGUUUUGUAGUUAGAAUUGGA	Chr2	20015770	20015793	+		intergenic		0	12	3	10	3	10		0	0	0	0	0	0		9	13	9	13	0	2
masiRNA_u_0147	CUACGAAUCUGUCCUGGACUGGAC	Chr2	20952169	20952192	+		repeat		4	7	9	7	4	6		0	0	0	1	0	0		1	6	4	4	1	3
masiRNA_u_0148	CUUUUGCAUGUGGAUCCGAUGAAU	Chr2	20962155	20962178	+		intergenic		8	13	0	5	4	7		0	0	0	0	0	0		8	6	5	3	8	1
masiRNA_u_0149	CUUCUAAUUUUGACGUGGAACUAA	Chr2	22550936	22550959	+		repeat		1	2	4	2	4	9		0	0	0	0	0	0		5	6	6	2	0	2
masiRNA_u_0150	CAAAUAACCGAAGACCGAGACCGA	Chr2	23033067	23033090	+		repeat		12	16	5	4	3	9		0	0	0	0	0	0		11	9	3	2	4	3
masiRNA_u_0151	CUACAAUCUGAAUGGCCUCGUAAU	Chr2	25353063	25353086	+		intergenic		11	15	2	8	6	7		0	0	0	0	0	0		16	8	7	11	2	6
masiRNA_u_0152	CUAACCGAAGCUACUCUAUGGGAC	Chr2	25500675	25500698	+		repeat		1	7	3	5	1	10		1	0	0	0	0	0		8	4	1	3	6	5
masiRNA_u_0153	CAACGACUUAUAAUAUGAAAUGAU	Chr2	26462995	26463018	+		repeat		3	2	5	3	1	9		0	0	0	0	0	0		6	4	2	4	2	4
masiRNA_u_0154	CAAAUUAUAAAUGCAAUGUCGGGU	Chr2	26475324	26475347	+		intergenic		7	21	9	8	4	12		0	4	1	1	0	0		8	10	8	8	4	5
masiRNA_u_0155	CAAGUGCUAGAAAAUUUGACGUGU	Chr2	28949044	28949067	+		intergenic		27	21	15	11	16	13		0	0	0	0	0	0		2	14	3	8	2	9
masiRNA_u_0156	CUAGAAAAUUUGACGUGUUAGGCU	Chr2	28949050	28949073	+		intergenic		81	186	92	90	64	141		3	2	0	0	0	2		135	174	73	71	63	67
masiRNA_u_0157	CUUACUAUACUAUUAAUAUCUGAU	Chr2	30291431	30291454	+		repeat		2	5	1	5	8	6		0	0	0	0	0	0		2	10	0	1	1	6
masiRNA_u_0158	CGAUCUAUGAUAGCCGGACCAAAU	Chr2	31186962	31186985	+		intergenic		13	11	6	3	3	8		0	0	0	0	0	0		6	8	7	3	7	3
masiRNA_u_0159	CGGUCUUCAAUAUGCUACUUUGAU	Chr2	34197779	34197802	+		repeat		0	1	3	3	3	9		0	0	0	0	0	0		5	11	3	4	1	5
masiRNA_u_0160	CUAUUAUCUCUAACAAACUCUUAA	Chr2	34385169	34385192	+		repeat		5	4	7	2	7	8		0	0	0	0	0	0		13	6	3	5	3	8
masiRNA_u_0161	CUUCUUAAAUCCGAUCUAUCUGAG	Chr2	616528	616551	+		intergenic		5	5	12	2	1	1		0	1	1	0	0	0		7	3	1	1	3	2
masiRNA_u_0162	CUUCCGGCCGAUGACAAUAUCAAU	Chr2	2195719	2195742	+		intergenic		20	16	5	6	1	3		0	1	0	0	0	0		11	13	10	2	5	3
masiRNA_u_0163	CUAAUACGAUAAAUCUGGACAGAU	Chr2	3537555	3537578	+		repeat		3	4	4	14	3	5		0	0	0	0	0	0		7	6	2	6	4	2
masiRNA_u_0164	UUCCUCGUAUUGUGCACAGUUGUU	Chr2	6001598	6001621	+		24-PHAS		0	0	17	19	1	5		0	0	0	0	0	0		0	0	0	0	0	0
masiRNA_u_0165	CGAAAACCGACAGUAGCAACAAAU	Chr2	6107872	6107895	+		intergenic		20	38	4	15	1	4		0	0	0	0	0	0		34	26	9	7	5	8
masiRNA_u_0166	CUAUAAUUUUUAUAAACGGACCAU	Chr2	8230880	8230903	+		intergenic		4	8	6	5	3	0		0	0	0	0	0	0		9	4	8	3	1	6
masiRNA_u_0167	CUGCACAAUGUAAGACAAUAUGGA	Chr2	8388959	8388982	+		intergenic		0	5	5	5	1	3		0	0	0	0	0	0		3	4	0	1	3	0
masiRNA_u_0168	CUCUCCGUUACUGUGACUACCAUG	Chr2	8390759	8390782	+		gene		15	16	9	3	4	5		0	0	0	0	0	1		6	7	3	3	2	0
masiRNA_u_0169	UCUUUUCCCCUGUUAGAGCUUGUG	Chr2	21337642	21337665	+		intergenic		4	2	6	6	1	5		0	0	0	0	0	1		5	5	1	1	0	1
masiRNA_u_0170	CUAGGACAAUGUAUGUAGACAUGC	Chr2	23130361	23130384	+		repeat		0	3	4	7	1	4		0	0	0	0	0	0		6	8	0	2	0	0
masiRNA_u_0171	CAAGUCAAAACCGCUAAGAACAAU	Chr2	23639033	23639056	+		repeat		6	10	5	6	2	5		0	0	0	0	0	0		10	10	8	7	2	9
masiRNA_u_0172	CAAAAUCAAGACGUGUUGUAACCU	Chr2	26339822	26339845	+		repeat		2	9	2	8	1	7		0	0	0	0	0	0		2	8	6	1	3	6
masiRNA_u_0173	CAACGAAUCUGAAUCUGGACAAAG	Chr2	26811215	26811238	+		repeat		3	7	7	4	3	2		0	0	0	0	0	0		3	3	2	1	3	2
masiRNA_u_0174	CUAACAUGUGGGACCGAUGGUCAG	Chr2	28343876	28343899	+		intergenic		8	16	4	13	4	5		1	1	0	0	0	0		16	7	11	3	6	3
masiRNA_u_0175	CUAUGACGUGUUGUAUCUGAUACU	Chr2	28886684	28886707	+		intergenic		2	2	6	4	1	2		0	0	0	0	0	0		3	4	1	0	0	5
masiRNA_u_0176	CUAUCCGAUCCAAACUGUAAGCAU	Chr2	34682630	34682653	+		intergenic		9	11	8	6	5	4		0	1	0	0	0	0		9	6	6	4	4	4
masiRNA_u_0177	CAACUGUACAGAGGACGUGACAAG	Chr2	616610	616633	+		intergenic		5	5	3	1	0	1		0	0	0	0	0	0		3	0	0	1	1	1
masiRNA_u_0178	CUUCUCAUUUAUGUUAUGGACUAU	Chr2	847187	847210	+		intergenic		2	9	3	4	1	2		0	0	0	0	0	0		3	1	6	3	0	1
masiRNA_u_0179	CCUCGUGAUGUAGAAACUGCAACC	Chr2	848261	848284	+		intergenic		6	5	6	2	1	3		0	0	0	0	0	0		9	1	2	1	1	3
masiRNA_u_0180	CAACCACCUGAAACUCAUACUAAU	Chr2	848280	848303	+		intergenic		11	30	4	1	3	5		0	0	0	0	2	0		14	12	4	7	2	5
masiRNA_u_0181	CUAAAUUAUUAUAUUGUGGGACAG	Chr2	1452199	1452222	+		repeat		3	9	1	5	2	6		0	0	0	0	0	0		7	3	5	5	3	0
masiRNA_u_0182	CUAAUACAACGAAUCUGGACAAGC	Chr2	1607511	1607534	+		repeat		8	8	4	3	3	3		0	0	0	0	0	0		2	5	3	1	2	2
masiRNA_u_0183	CUAAUUUAGGACGUUUAUAUAUAU	Chr2	2944464	2944487	+		intergenic		7	18	5	2	4	1		0	0	0	0	0	0		14	12	11	9	1	9
masiRNA_u_0184	CAAGACAAAAGCGUCGGGCAUGAG	Chr2	3469652	3469675	+		intergenic		2	10	0	5	0	6		0	1	0	0	0	0		2	4	4	5	2	2
masiRNA_u_0185	CAUCGAAUCUUUGGACACUUACAU	Chr2	3685140	3685163	+		repeat		3	7	1	1	1	1		0	0	0	0	0	0		7	5	0	0	2	3
masiRNA_u_0186	CUGAGACAUUUAGACCCGAGCGAU	Chr2	4742720	4742743	+		gene		3	11	1	3	2	6		1	0	0	0	0	0		1	12	6	4	0	2
masiRNA_u_0187	CAACCAUCCGAGCUCUGUAUCUAC	Chr2	6216097	6216120	+		gene		11	24	6	2	4	3		0	0	0	1	0	0		6	3	2	3	2	3
masiRNA_u_0188	CAAGGACUUCCAGACGUAACGUGU	Chr2	6663964	6663987	+		repeat		13	5	4	3	1	1		0	0	0	0	0	0		1	4	2	1	0	1
masiRNA_u_0189	CAAACUCAGAUCGUCUAGCCCACC	Chr2	7538667	7538690	+		repeat		8	3	0	1	1	1		0	0	0	0	0	0		7	5	4	3	0	3
masiRNA_u_0190	CAUCAUCAAUAAUUCUAAGCCGUU	Chr2	7639773	7639796	+		intergenic		3	10	2	1	0	1		0	0	0	0	0	0		9	4	6	4	2	1
masiRNA_u_0191	CGGCGAUGGCAUUUUUGGACAAAG	Chr2	7680740	7680763	+		gene		5	6	4	4	2	1		0	0	0	0	0	0		8	1	0	2	3	1
masiRNA_u_0192	CAUAAAGAAGUACACAUCCAUGGG	Chr2	7680981	7681004	+		gene		2	9	4	5	3	3		0	0	0	0	0	0		4	4	2	0	0	3
masiRNA_u_0193	CAAGGUGAAAUGAAUGAAGUCGAU	Chr2	8708859	8708882	+		intergenic		4	11	4	4	2	1		0	0	0	0	0	0		2	3	2	1	0	2
masiRNA_u_0194	CAAAUUUAUACACGGAAACUCAAG	Chr2	9992379	9992402	+		repeat		6	8	1	6	2	4		0	0	0	0	0	0		7	2	2	2	1	4
masiRNA_u_0195	CAAGACAAUUCUGCCACCUCCAAU	Chr2	10177112	10177135	+		repeat		3	8	0	3	0	1		0	0	0	0	0	0		3	2	2	0	2	1
masiRNA_u_0196	CAAAGUUGUGUUUUGUAGAUCGAG	Chr2	10718440	10718463	+		repeat		6	4	4	4	0	3		0	0	0	0	0	0		6	4	2	4	3	2
masiRNA_u_0197	CAAAUCAAGAAUAAGACGCUCAAC	Chr2	11346614	11346637	+		gene		6	11	3	4	3	3		0	0	0	0	0	0		14	6	9	6	1	4
masiRNA_u_0198	CAUAGCAAAUAUGUGUAGACUAGC	Chr2	11346677	11346700	+		gene		3	7	0	9	1	6		0	0	0	0	0	0		6	2	0	3	1	4
masiRNA_u_0199	CUUUCUACUGUAGAUCCGUCCAUG	Chr2	12146417	12146440	+		repeat		8	12	6	2	3	6		1	1	0	0	1	0		13	3	1	2	2	3
masiRNA_u_0200	CUAGUUUAGAAAGGGCGGAAUCAG	Chr2	17120853	17120876	+		intergenic		6	8	5	2	1	6		0	0	0	0	0	0		5	2	7	4	2	0
masiRNA_u_0201	CAACUAUAAGAGGAUGGAGACGCU	Chr2	17217638	17217661	+		gene		11	21	5	4	2	6		0	1	0	0	0	0		5	6	3	2	4	3
masiRNA_u_0202	CAAAUAUUCGACGUGACACCCAAA	Chr2	19185523	19185546	+		repeat		5	5	2	5	2	2		0	0	0	0	0	0		3	7	3	0	4	2
masiRNA_u_0203	CAUCGAUUUAUAGUACUGAAAUAU	Chr2	22473309	22473332	+		repeat		2	9	2	7	2	6		0	0	0	0	0	0		6	8	1	1	0	6
masiRNA_u_0204	CUAGUAACAGUAGUAGGGCGACGC	Chr2	24345675	24345698	+		intergenic		6	9	6	1	0	0		0	0	0	0	0	0		7	6	5	1	2	2
masiRNA_u_0205	CUAAAAAAAAAUUUAGGACUAGAU	Chr2	25205762	25205785	+		repeat		3	13	1	4	1	5		1	0	0	0	0	0		3	3	7	4	2	1
masiRNA_u_0206	CUAGAAAAUGGUUGUAUGACACGU	Chr2	28377215	28377238	+		repeat		7	6	2	0	0	3		0	0	0	0	0	0		3	7	3	4	2	0
masiRNA_u_0207	CAUCUCCAUACCGUGUCUCUAGAU	Chr2	31526579	31526602	+		intergenic		4	7	0	1	4	4		0	0	0	0	0	0		11	6	4	2	2	1
masiRNA_u_0208	CUAUAGAUCUGUAGCUAGCUGCGC	Chr2	32729675	32729698	+		repeat		9	1	4	2	1	2		1	0	0	0	0	1		1	2	1	1	0	1
masiRNA_u_0209	CUUCUCAACGUCGUUACUACCGAG	Chr2	32925921	32925944	+		repeat		12	4	8	1	3	4		0	0	0	0	0	0		10	11	4	4	4	3
masiRNA_u_0210	CAUAUUUUCUUGGUUCCUGUACGU	Chr2	33328270	33328293	+		repeat		5	7	6	0	2	4		0	1	0	0	0	0		7	5	2	0	1	4
masiRNA_u_0211	CUUUUUUAUGAUAUGUUUGGCCGU	Chr2	33869136	33869159	+		repeat		2	11	1	2	1	3		0	0	0	0	0	0		9	2	0	2	1	1
masiRNA_u_0212	CAGCUGUGUGUAUCUGUAUCCAAC	Chr2	34684580	34684603	+		repeat		10	9	1	5	7	1		0	0	0	0	0	0		3	5	2	3	3	4
masiRNA_u_0213	CGAGGAACUGUAGUUAUACACUAU	Chr3	1393651	1393674	+		repeat		4	9	2	6	3	7		0	0	0	0	0	0		8	9	5	4	4	2
masiRNA_u_0214	CAGCUGUAAACAUAUUUUAAUGAG	Chr3	1464317	1464340	+		repeat		1	8	7	12	3	12		0	0	0	0	0	0		15	11	9	15	3	14
masiRNA_u_0215	CUGUCUGCUGUAAUUAAUUUUGGU	Chr3	2137085	2137108	+		intergenic		3	4	3	3	5	6		0	0	0	0	0	0		0	0	0	0	0	0
masiRNA_u_0216	CUACUGACGUAAAGACUAUGAAAG	Chr3	2960879	2960902	+		repeat		2	5	3	5	2	10		0	0	0	0	0	0		3	2	5	3	3	5
masiRNA_u_0217	CUACGAAUCUAGACAUGAGGACAU	Chr3	5012773	5012796	+		repeat		3	2	2	5	5	6		0	0	0	0	0	0		8	7	8	2	5	5
masiRNA_u_0218	CUAAAAGACGUAUGACAGAAAAUU	Chr3	5748022	5748045	+		gene		6	8	6	11	6	6		1	0	0	0	0	0		6	7	12	3	4	7
masiRNA_u_0219	CAUUUUAAGAAUGUUAGGAGUGAU	Chr3	8035967	8035990	+		intergenic		13	57	15	33	5	18		0	0	0	0	0	0		45	52	15	43	4	18
masiRNA_u_0220	CAAGCUAUUCUAGAUCUGAACAAC	Chr3	8812044	8812067	+		intergenic		9	5	13	11	16	10		0	0	0	0	0	0		7	6	1	6	0	2
masiRNA_u_0221	CGGUCUCCAAAACACAACUUUGAC	Chr3	11052082	11052105	+		repeat		3	14	4	11	10	27		1	1	0	0	1	1		25	27	13	22	11	14
masiRNA_u_0222	CAAAUGACUGUUGUUCGACUAGAU	Chr3	11501942	11501965	+		intergenic		0	5	0	10	5	6		0	0	0	0	0	0		0	0	0	0	0	0
masiRNA_u_0223	CAAUUUGAAGUGAACUGGAACUGG	Chr3	12874932	12874955	+		24-PHAS		0	0	3	4	10	12		0	0	0	0	0	1		0	0	0	0	0	0
masiRNA_u_0224	CUAACAAACUGUGACAUCUAAAAG	Chr3	16785844	16785867	+		repeat		4	9	1	5	1	10		0	0	0	0	0	0		18	11	18	9	2	10
masiRNA_u_0225	CUAGACGAAGCUCUCUCAUAAAAU	Chr3	17753890	17753913	+		repeat		16	24	13	7	17	16		0	0	0	0	0	0		16	10	12	9	6	9
masiRNA_u_0226	CGAUGAUAUAUUGUAGAACAUGAU	Chr3	21064712	21064735	+		repeat		3	21	7	8	4	20		0	1	0	0	0	0		20	12	15	12	4	9
masiRNA_u_0227	CAUGCUUAUCCGGUCUGUGACCAG	Chr3	22186401	22186424	+		repeat		7	11	6	3	8	3		0	0	0	0	0	0		6	9	5	2	1	1
masiRNA_u_0228	CUUUCAAUUUUGACGUGAACUAAA	Chr3	22243215	22243238	+		repeat		6	16	14	17	10	36		0	0	0	0	0	0		35	26	16	15	11	16
masiRNA_u_0229	CAAUCUCAUGUCGCUCAUAACCAG	Chr3	22407483	22407506	+		intergenic		4	3	6	1	2	10		0	0	1	0	0	0		4	4	6	1	1	4
masiRNA_u_0230	CAUUCUCUAACAAUCCUUAACUGU	Chr3	22408120	22408143	+		intergenic		3	3	0	2	5	5		0	0	0	0	0	0		2	1	3	4	1	10
masiRNA_u_0231	CAACCACUGAUAGUAAUGACAACU	Chr3	22408417	22408440	+		intergenic		1	5	8	6	5	16		0	0	0	0	0	0		4	0	11	6	5	10
masiRNA_u_0232	CGAGAACAGGUAAUACGAAAUGGA	Chr3	22408963	22408986	+		intergenic		0	2	3	1	6	6		0	0	0	0	0	0		3	4	5	4	3	6
masiRNA_u_0233	CUAAUACAAUAAAUCUGGACGGAG	Chr3	22585175	22585198	+		repeat		7	15	4	2	3	8		0	0	0	0	0	0		10	9	5	2	7	4
masiRNA_u_0234	CUUCUUAUAGUAGUUAUGGACCAU	Chr3	23905622	23905645	+		intergenic		7	21	5	8	5	12		0	0	0	0	0	0		15	16	5	3	3	8
masiRNA_u_0235	CAAAUUAAAUUUCGUCUGGACAUG	Chr3	24462941	24462964	+		repeat		66	84	34	33	18	44		0	5	0	2	0	0		70	58	41	26	20	20
masiRNA_u_0236	CUAACCGGAGUGCCAUCGCCUGAU	Chr3	24570799	24570822	+		intergenic		0	4	3	7	3	7		0	0	0	0	0	0		6	3	6	5	6	2
masiRNA_u_0237	CUAGACUAUUAGUACCGAUAUCAU	Chr3	24570845	24570868	+		intergenic		6	27	20	37	10	50		0	0	0	0	0	0		12	24	33	22	16	34
masiRNA_u_0238	CUAAAACGAAUAUGUACUGGAUAC	Chr3	24572035	24572058	+		intergenic		1	0	2	2	6	4		0	0	0	0	0	0		0	1	1	2	1	3
masiRNA_u_0239	CUAGACUAUUAGCACCGAUAUCAU	Chr3	24604510	24604533	+		intergenic		5	9	10	13	13	23		0	0	0	0	1	1		7	7	11	9	13	9
masiRNA_u_0240	CUAUUCGAUAGAAACUCAAUUGGU	Chr3	26124510	26124533	+		intergenic		2	0	3	3	2	9		0	0	0	0	0	1		1	1	3	5	2	3
masiRNA_u_0241	CGAGACAUUUCAUAGGACAACGAA	Chr3	26323135	26323158	+		repeat		3	9	2	8	0	12		0	0	0	0	0	0		10	14	11	11	6	5
masiRNA_u_0242	CACAACAGACUAUAGUUAAAUGAU	Chr3	26510662	26510685	+		intergenic		2	6	4	13	7	14		0	0	1	1	0	0		3	13	5	2	5	5
masiRNA_u_0243	CUGAAAAAAAUUGACAAUGUAGAG	Chr3	26783211	26783234	+		repeat		11	26	13	23	12	22		0	0	0	0	0	0		39	30	21	12	12	24
masiRNA_u_0244	CAGGGAUAGAAAAAACGUAGGAAU	Chr3	28628945	28628968	+		repeat		12	15	7	8	5	7		0	0	0	0	0	0		7	8	7	4	7	3
masiRNA_u_0245	CAACUGUGUGCCAUGAAAAUCAAU	Chr3	29105675	29105698	+		intergenic		65	149	21	42	7	27		0	2	0	0	0	0		75	47	47	29	16	16
masiRNA_u_0246	CCGAACUGAAAAGACUGAGACCGA	Chr3	29145707	29145730	+		repeat		15	6	8	2	8	5		0	0	0	0	0	0		9	9	4	6	1	2
masiRNA_u_0247	CGAACUGAAAAGACUGAGACCGAG	Chr3	29145708	29145731	+		repeat		7	25	7	13	5	21		1	0	1	0	0	0		31	22	4	7	1	7
masiRNA_u_0248	CAAGCCAACAUACGCCAAGACAAG	Chr3	31003827	31003850	+		repeat		2	6	3	5	2	9		0	0	0	0	0	0		6	4	4	3	4	4
masiRNA_u_0249	CAGGAAUACAAUUGUAAAACAGAG	Chr3	31767345	31767368	+		repeat		7	16	1	12	6	14		0	0	0	0	0	0		10	9	11	5	0	10
masiRNA_u_0250	CUAGGCAACGAUGUAUGAACAUAC	Chr3	32355593	32355616	+		intergenic		12	10	18	7	11	15		0	0	0	0	0	0		24	11	9	9	6	15
masiRNA_u_0251	CUAGAAUCUUUGAUGACAGUAGUU	Chr3	32478076	32478099	+		intergenic		0	0	1	0	9	2		0	0	0	0	0	0		0	1	0	0	2	0
masiRNA_u_0252	CAAUUCGGUCCUAGGUAGUGAAAG	Chr3	33255401	33255424	+		repeat		15	14	12	9	8	8		0	0	0	0	0	0		9	11	7	7	10	8
masiRNA_u_0253	CUUUUAAUUUUGCUGUGAACUAAA	Chr3	34829117	34829140	+		repeat		3	1	3	6	1	10		0	0	0	0	0	0		3	7	5	7	3	4
masiRNA_u_0254	CUAUUAAACAUAUGUAGAGGAGAG	Chr3	34916257	34916280	+		repeat		7	8	4	1	4	13		0	0	1	0	0	0		9	9	6	2	4	13
masiRNA_u_0255	CUAGUACCAGUGAAGUUUGACAAU	Chr3	34952230	34952253	+		repeat		10	20	18	15	4	12		0	0	0	0	0	0		18	11	12	10	3	12
masiRNA_u_0256	CUACUACUUUCGGGCUCACAUGGU	Chr3	35864614	35864637	+		intergenic		19	11	11	5	10	5		0	0	0	0	0	0		10	6	11	4	1	5
masiRNA_u_0257	CCACCUACUGUAUAUCCGGAAAAU	Chr3	36356685	36356708	+		gene		12	36	15	19	15	19		0	0	0	0	0	0		40	17	26	15	14	14
masiRNA_u_0258	CAGACUCUAAAACACAAUAUGUAU	Chr3	5357468	5357491	+		repeat		6	27	3	8	1	6		0	0	0	0	0	0		6	4	3	2	1	3
masiRNA_u_0259	CUAGGUUGUAUACAUUGUAGAAGU	Chr3	15427788	15427811	+		repeat		1	2	8	2	0	1		0	0	0	0	0	0		2	3	1	1	1	3
masiRNA_u_0260	UUUUCCUGUCUCUUGUACAAUAUA	Chr3	15639438	15639461	+		gene		1	4	2	8	4	5		0	0	0	0	0	0		8	5	5	4	0	7
masiRNA_u_0261	CAUCUCCAGAUUUGUAGUACUAGG	Chr3	23510946	23510969	+		repeat		7	4	8	4	5	3		0	0	0	0	0	0		5	5	2	6	3	4
masiRNA_u_0262	CUAGUACAAAAAGUUCUGAAGCAC	Chr3	29105972	29105995	+		intergenic		19	41	10	10	2	5		0	2	0	0	0	0		21	15	9	16	3	7
masiRNA_u_0263	CGAAUCUGAAUAUACUCGUAGUAU	Chr3	30072062	30072085	+		repeat		0	5	4	7	1	5		0	0	0	0	0	1		8	7	4	1	3	5
masiRNA_u_0264	CAGAGAAUUGCAAAACACAGGAAU	Chr3	31767364	31767387	+		repeat		6	11	6	4	1	8		0	0	0	0	0	0		8	10	5	5	1	3
masiRNA_u_0265	CUUUCUUAUUUUGUCCGGCCUUAC	Chr3	461674	461697	+		intergenic		2	18	0	0	0	0		0	0	0	0	0	0		4	1	2	2	0	0
masiRNA_u_0266	CUAUUAAAUAAUUUGAUGCCCUGC	Chr3	461877	461900	+		intergenic		9	10	6	2	0	0		0	0	0	0	0	0		4	4	1	1	1	0
masiRNA_u_0267	CAUCGCACAUAUCGCACCACUGAU	Chr3	461928	461951	+		intergenic		3	10	0	3	1	2		0	3	0	0	0	0		9	3	0	2	0	3
masiRNA_u_0268	CAACGCAAAAAUGUUAGGAUCGAU	Chr3	1772114	1772137	+		repeat		1	9	3	4	5	3		0	0	0	0	0	0		9	4	4	7	1	2
masiRNA_u_0269	CUAUAUUAAUUAUAAAGGACGCAG	Chr3	2795561	2795584	+		repeat		8	3	4	0	3	6		0	0	0	0	0	0		5	1	0	4	0	3
masiRNA_u_0270	CAAUGAUAUGUGGACCCUUAUGUG	Chr3	3942554	3942577	+		repeat		10	5	3	2	3	4		0	1	0	0	0	0		1	9	2	0	1	2
masiRNA_u_0271	CUUUUCUAAAAGACGUAUGACAGA	Chr3	5748017	5748040	+		gene		1	10	4	5	1	5		0	0	0	0	0	0		3	5	5	0	1	0
masiRNA_u_0272	CUUAGAAUUCCAGCACUGUCAAAC	Chr3	8036494	8036517	+		intergenic		2	8	0	0	0	0		0	0	0	0	0	0		5	2	1	3	0	1
masiRNA_u_0273	CAGUGCAACGAAUCUGGACAGGAG	Chr3	9318314	9318337	+		repeat		6	7	4	1	1	3		0	0	0	0	0	0		3	4	1	0	2	1
masiRNA_u_0274	CAACGCCACGUAGGACAAAGACUG	Chr3	9836802	9836825	+		repeat		10	2	4	3	1	1		0	0	0	0	0	0		1	2	0	0	0	0
masiRNA_u_0275	CUUCUCUCUGCGGUGCUGUCUCAG	Chr3	14060908	14060931	+		gene		8	6	1	1	2	1		0	0	0	0	1	0		5	4	3	1	2	1
masiRNA_u_0276	CCAAACUAUAUAAACCGGACGAAU	Chr3	16863643	16863666	+		repeat		1	10	2	5	0	5		0	0	0	0	0	0		7	3	3	1	1	4
masiRNA_u_0277	CUUCUAAUUUCAGUGGGCCAUGAG	Chr3	17120525	17120548	+		gene		10	16	1	2	0	6		0	0	0	0	0	0		10	6	1	2	1	2
masiRNA_u_0278	CCAUGCCGAUAACUGUUAAAUGAG	Chr3	20703269	20703292	+		intergenic		4	10	0	2	1	2		0	0	0	0	0	0		7	3	2	1	1	1
masiRNA_u_0279	CAAUGACUCUGACACCCAAAAAAG	Chr3	21075951	21075974	+		repeat		5	5	6	2	4	4		0	0	0	0	0	0		2	1	1	1	3	2
masiRNA_u_0280	CUAAAUUUGUUAGGAUCGGACGAU	Chr3	23497152	23497175	+		repeat		2	9	0	6	1	7		0	1	0	0	0	0		10	5	8	6	2	0
masiRNA_u_0281	CAGUUUGUUAGGUAUGUGUCUGGU	Chr3	23832832	23832855	+		repeat		4	12	2	1	2	4		1	0	0	0	0	0		4	2	1	2	3	1
masiRNA_u_0282	CAUAGAACUGCAAAACAUAGGAAU	Chr3	23862942	23862965	+		repeat		1	9	2	5	0	2		0	0	0	0	0	0		1	4	2	2	1	1
masiRNA_u_0283	CAAUUAAAAUGAGACUGGAGAGAG	Chr3	23981031	23981054	+		repeat		1	10	0	0	1	1		0	0	0	0	0	0		2	1	3	0	1	3
masiRNA_u_0284	CUUUUUUUCAUUUAUUUGUAGAUU	Chr3	24147079	24147102	+		intergenic		3	7	2	2	1	5		0	0	0	0	0	0		8	9	4	2	3	2
masiRNA_u_0285	CAUAGGAUCGUAGAGGGGAUGUGU	Chr3	24695102	24695125	+		repeat		9	8	3	0	2	1		0	0	0	0	0	0		4	4	0	0	0	0
masiRNA_u_0286	CAUAAAACCCGAGACCCCGACGAC	Chr3	26783811	26783834	+		repeat		6	11	1	1	1	6		0	0	0	0	0	0		6	2	1	1	4	1
masiRNA_u_0287	CAUUUUUUUUACAACUGGGACCAU	Chr3	28545209	28545232	+		repeat		4	6	4	1	1	1		0	0	0	0	0	0		11	1	5	1	4	3
masiRNA_u_0288	CAACCAACUGUGUGCCAUGAAAAU	Chr3	29105671	29105694	+		intergenic		11	24	4	2	1	6		0	0	0	0	0	0		7	4	6	5	5	1
masiRNA_u_0289	CAAAGAACAUGUGUGCUUAACUCU	Chr3	29106220	29106243	+		repeat		7	7	0	3	4	1		0	0	0	0	0	0		1	11	2	4	3	2
masiRNA_u_0290	CUAACGAACUAUGAGAUACGCAGC	Chr3	29106456	29106479	+		repeat		8	2	4	0	2	0		0	0	0	0	0	0		4	2	3	1	1	1
masiRNA_u_0291	CUAGAACCGAACGGGAUGUAUCCU	Chr3	29859818	29859841	+		repeat		6	5	0	1	1	1		0	0	0	0	0	0		3	3	2	1	2	2
masiRNA_u_0292	CAAAAGAGGGUCGUGGUUAACUAG	Chr3	30840354	30840377	+		intergenic		3	8	1	0	0	1		0	0	0	0	0	0		1	1	2	2	0	0
masiRNA_u_0293	CGAUCUGAAGUAGAAUAAAGCAAG	Chr3	33009370	33009393	+		repeat		6	6	3	5	5	3		0	0	0	0	0	0		7	1	4	2	4	2
masiRNA_u_0294	CAAUCUCAAGACAUGUCGGCCCAG	Chr3	33249504	33249527	+		repeat		6	10	3	0	4	2		0	0	0	0	0	0		5	7	1	0	1	1
masiRNA_u_0295	CAAGAUAUAUUAGAUGCGGAACCC	Chr3	33263201	33263224	+		intergenic		6	5	0	1	1	1		0	0	0	0	0	0		3	4	2	4	2	0
masiRNA_u_0296	CGGAGUUAAUUUUAGGAAGGACAG	Chr3	33263401	33263424	+		intergenic		10	15	1	0	0	3		0	1	0	0	0	0		10	2	3	2	1	2
masiRNA_u_0297	CUAUCUAGAUUUGUAGUAAACGUG	Chr3	33558284	33558307	+		repeat		9	7	4	3	3	4		0	1	0	0	0	0		1	3	1	0	2	4
masiRNA_u_0298	CAUAUCUGUAGCUAGCUGUAGCAC	Chr4	722343	722366	+		repeat		11	7	14	6	18	14		0	0	0	0	0	0		6	14	10	12	3	8
masiRNA_u_0299	CCGAGUGUGUAUUGAUCUGACGAU	Chr4	2432639	2432662	+		repeat		11	38	12	20	4	21		0	2	0	0	0	0		19	18	20	8	7	3
masiRNA_u_0300	CGAGUGUGUAUUGAUCUGACGAUC	Chr4	2432640	2432663	+		repeat		144	88	77	38	61	59		1	2	0	0	0	1		47	59	38	25	9	17
masiRNA_u_0301	CUUCCGCUUGAUAAACUCUGAAAU	Chr4	2691192	2691215	+		repeat		15	15	9	14	7	17		0	0	0	0	0	0		20	11	17	5	8	8
masiRNA_u_0302	CAUACGAUGGAAAAACAUAGAACC	Chr4	4939631	4939654	+		repeat		10	12	6	3	4	8		0	1	0	0	0	0		9	8	11	4	4	4
masiRNA_u_0303	CAAAAACGUGACACGGCUGAUGGA	Chr4	5483587	5483610	+		repeat		4	18	2	9	1	23		0	0	1	0	0	0		20	15	5	4	5	5
masiRNA_u_0304	CUUCGAGAUGUUAAUUUGACCAAU	Chr4	6633266	6633289	+		repeat		1	20	7	12	1	16		0	0	1	0	0	0		19	14	12	4	8	7
masiRNA_u_0305	CCAACCGAUAUCGUGAACAGUGAU	Chr4	12323522	12323545	+		repeat		34	32	33	21	25	33		0	0	2	0	0	0		49	40	22	5	14	17
masiRNA_u_0306	CUAGGGAUGAAAACGGGUUAGAAU	Chr4	14818474	14818497	+		repeat		15	27	7	4	6	11		0	1	0	1	0	0		12	9	6	7	4	6
masiRNA_u_0307	CUAAGAUUCGUAGUGCUAGAAUGU	Chr4	16197552	16197575	+		repeat		12	36	12	16	4	10		0	0	0	0	1	0		19	17	16	14	3	5
masiRNA_u_0308	CAACGGGUAUAUUUGCAGACUAAA	Chr4	16833986	16834009	+		gene		51	97	24	30	12	37		0	2	1	0	2	0		85	50	32	28	21	25
masiRNA_u_0309	CUUAUAUUUUUGAGACCCCCUGAG	Chr4	18177470	18177493	+		intergenic		4	10	1	7	5	7		0	0	0	0	0	0		7	2	2	5	3	4
masiRNA_u_0310	CCUGAUCAAGUUGUAAAUAUUAUG	Chr4	18234210	18234233	+		24-PHAS		0	0	2	3	3	7		0	0	0	1	0	3		0	0	0	1	0	1
masiRNA_u_0311	CUAAUACAACGAAUCUGGACAGAG	Chr4	18382273	18382296	+		repeat		8	10	6	5	6	5		0	0	0	0	0	0		5	3	5	6	2	0
masiRNA_u_0312	CAUCCGAUUUUAGAUUGCUGCUAU	Chr4	19122424	19122447	+		intergenic		17	20	16	14	8	16		0	0	1	0	0	0		22	15	7	6	4	15
masiRNA_u_0313	CUAUUAAAUUGGCUAUAGAUGAAU	Chr4	20304332	20304355	+		repeat		1	12	8	14	6	15		0	0	1	0	0	0		13	10	9	8	3	11
masiRNA_u_0314	CUAUUUAACUUUUAGGGACUCGAA	Chr4	21103733	21103756	+		repeat		4	20	12	9	15	37		0	0	0	0	0	0		30	28	19	15	11	14
masiRNA_u_0315	CUGUCCAUCUGUUUUCAUUAAAAU	Chr4	21849905	21849928	+		repeat		5	12	5	7	3	8		0	0	0	0	0	0		3	3	2	4	2	3
masiRNA_u_0316	CGAGACGAAUCUUUUGAGACUAAU	Chr4	22319579	22319602	+		repeat		14	22	12	11	6	13		0	0	0	0	0	0		10	18	11	14	5	18
masiRNA_u_0317	CAAGACGUAGUGUGUAUGAAAGAU	Chr4	22453306	22453329	+		repeat		1	13	12	10	7	12		0	0	0	0	0	0		5	12	5	3	10	5
masiRNA_u_0318	CAAAGACUGACAGGUGGAUCCGAU	Chr4	25181236	25181259	+		intergenic		5	6	3	2	6	4		0	0	0	0	0	0		5	7	2	1	3	3
masiRNA_u_0319	CAACCAAAAAUAGGUCGUGGGCUC	Chr4	26986241	26986264	+		repeat		16	8	15	9	6	9		0	0	0	0	0	0		6	12	3	5	3	2
masiRNA_u_0320	CAAAAAUAGGUCGUGGGCUCAACG	Chr4	26986245	26986268	+		repeat		44	18	23	17	22	11		0	0	0	0	0	0		12	16	3	6	3	4
masiRNA_u_0321	CUGACUCAGUUGGAUUGACCGUAG	Chr4	28859675	28859698	+		intergenic		5	13	12	15	8	22		0	0	0	0	0	0		21	26	21	5	12	8
masiRNA_u_0322	CUCCGAUCUGUUGUGCGCAUGCAA	Chr4	29256538	29256561	+		repeat		8	3	10	6	3	8		0	0	0	0	0	0		7	6	10	2	4	4
masiRNA_u_0323	CUAACUAUUGUAUGAAUUGACUAU	Chr4	30846892	30846915	+		repeat		1	6	6	12	1	10		0	0	0	0	0	0		2	14	5	8	1	3
masiRNA_u_0324	CUUUUAAUGGACGUAUGACAAAAU	Chr4	32402517	32402540	+		intergenic		3	33	5	15	2	31		0	0	0	0	1	0		13	15	15	9	9	10
masiRNA_u_0325	CUCGUUUAUCCGGUCUGUGACCAG	Chr4	33064381	33064404	+		repeat		9	18	12	7	4	12		0	0	0	0	0	0		18	15	11	9	2	3
masiRNA_u_0326	CGAACCUGUAUACAUCGCCCGUGU	Chr4	33065019	33065042	+		repeat		49	31	19	11	11	9		1	1	0	0	0	0		15	13	2	4	3	6
masiRNA_u_0327	CUCCAGAAGAGAGUGUAGUUCAAG	Chr4	33192276	33192299	+		repeat		0	3	2	6	4	9		0	0	0	0	0	0		6	7	5	5	2	10
masiRNA_u_0328	CAAGACAAGUUGAACACACCAAAC	Chr4	33192296	33192319	+		repeat		7	5	2	5	2	9		0	0	0	0	0	0		8	4	4	8	3	2
masiRNA_u_0329	CCACGAACUGUUGCACCGACAAUG	Chr4	35052050	35052073	+		intergenic		4	1	3	3	4	6		0	0	0	0	0	0		1	4	6	3	3	1
masiRNA_u_0330	CUAGUAAAACGAAUCUGAACAAAU	Chr4	11889583	11889606	+		repeat		0	9	1	9	3	2		0	0	0	0	0	0		8	5	8	2	3	4
masiRNA_u_0331	CUUUUAUUAUUUUUCUUGGACCGU	Chr4	16834420	16834443	+		intergenic		6	28	5	7	2	5		1	2	0	0	0	0		17	9	5	7	2	4
masiRNA_u_0332	CAAGUGUAGAAAAGUAUGACCAAG	Chr4	17576471	17576494	+		intergenic		4	8	6	6	0	9		0	0	0	0	0	0		5	4	4	3	2	2
masiRNA_u_0333	CAGUCAACUGUAAAGGAUCCCAAU	Chr4	23142984	23143007	+		intergenic		0	2	1	9	1	6		0	0	0	0	0	0		3	3	3	9	1	3
masiRNA_u_0334	CUUUCACGUGUAGCCUAUUAAGAG	Chr4	27070039	27070062	+		intergenic		2	2	7	3	1	6		0	0	0	0	0	0		7	2	1	1	0	1
masiRNA_u_0335	CAAACACACAUAUAGCUAACUCUC	Chr4	29146307	29146330	+		repeat		2	5	5	5	0	4		0	0	0	0	0	0		6	3	3	3	0	0
masiRNA_u_0336	CAUCGACUGUUAUGAUAUAUGCAU	Chr4	33205334	33205357	+		repeat		1	5	2	11	0	5		0	0	0	0	0	0		3	10	2	5	3	8
masiRNA_u_0337	CUCUCGGAAGUAGAGAGUGAGGAG	Chr4	633979	634002	+		intergenic		11	37	5	3	0	4		0	2	0	0	0	0		15	22	7	5	4	0
masiRNA_u_0338	CAAAUGUAUGUAGCACUAGGAUGU	Chr4	11889602	11889625	+		repeat		2	9	0	0	0	0		1	0	0	0	0	0		3	1	3	1	1	2
masiRNA_u_0339	CUAGCUCAGAAGCUAAGGACCGGU	Chr4	15380939	15380962	+		repeat		3	8	5	2	0	1		0	1	0	0	0	0		3	5	4	1	1	3
masiRNA_u_0340	CUAGUAAAUGAGCUCCUUAAUAAU	Chr4	16834037	16834060	+		gene		5	12	3	0	0	1		0	0	0	0	0	0		4	3	2	1	1	1
masiRNA_u_0341	CCACCCCCGGAUCGAGCGCCCAAG	Chr4	19715197	19715220	+		intergenic		9	17	6	2	3	4		0	0	0	0	0	0		6	6	3	3	5	4
masiRNA_u_0342	CUAAAGACAUGUGGACCGAGACAG	Chr4	20784640	20784663	+		repeat		11	9	3	2	3	2		0	0	0	0	1	0		4	5	5	2	3	1
masiRNA_u_0343	CCGGGUGACGAAGUUUGAUAUGAG	Chr4	23907919	23907942	+		repeat		10	1	3	2	1	1		0	0	0	0	0	0		2	2	2	0	3	0
masiRNA_u_0344	CUAUUAAUAUCUAGUCCCACCUGU	Chr4	24857790	24857813	+		repeat		3	7	3	3	0	2		0	0	0	0	0	0		3	1	1	1	2	1
masiRNA_u_0345	CUCGCUAAAGGAGUGUGCAAUGAC	Chr4	25939382	25939405	+		gene		2	10	2	2	4	4		0	0	0	0	0	0		2	5	8	3	1	2
masiRNA_u_0346	CCAGAUCCGACGGACAAGCUUAAG	Chr4	26009665	26009688	+		intergenic		13	11	0	2	0	2		0	1	0	0	0	0		26	7	1	0	0	1
masiRNA_u_0347	CAAGGUCAAUUGGACAAAGACAUG	Chr4	26225061	26225084	+		repeat		6	7	5	3	4	2		0	0	1	0	0	0		10	2	5	4	0	1
masiRNA_u_0348	CAAGCUCUAAACCUACAUGCACGU	Chr4	28189578	28189601	+		repeat		3	7	5	1	1	2		0	0	0	0	0	0		2	7	1	1	0	2
masiRNA_u_0349	CAAGGAGCUAAACAGCUGUGACGU	Chr4	31146344	31146367	+		intergenic		7	3	3	1	2	1		0	0	0	0	0	0		1	1	0	0	0	1
masiRNA_u_0350	CAAAAUCAAAAAGUGUGGCAUGAC	Chr4	31802279	31802302	+		repeat		1	11	3	3	1	2		0	0	0	0	0	0		13	6	9	3	1	5
masiRNA_u_0351	CUUUGGAUCUUGGACGGACGUGUC	Chr4	32609377	32609400	+		intergenic		5	5	1	0	3	1		1	0	0	0	0	0		3	2	0	0	0	1
masiRNA_u_0352	CCACCGGCGGUAAAUCAGAACACC	Chr5	1137556	1137579	+		intergenic		1	1	2	3	10	3		0	0	0	0	0	0		1	0	1	1	6	3
masiRNA_u_0353	CUUCCCUUCUUAGACUGGUCUGCU	Chr5	1682328	1682351	+		intergenic		2	12	0	2	6	8		0	0	0	0	1	0		1	2	2	0	6	3
masiRNA_u_0354	CAACGAGACAACGAAUCUAGACAU	Chr5	2348979	2349002	+		repeat		2	6	4	6	4	10		0	0	0	0	0	0		8	6	10	3	2	6
masiRNA_u_0355	CUUCGACUGAUCAUCCACAUGAUG	Chr5	11242704	11242727	+		intergenic		1	2	7	2	3	7		0	0	0	0	0	0		0	1	1	2	3	3
masiRNA_u_0356	CAAUAUUAUGGACAAGAAAGACAC	Chr5	11242934	11242957	+		intergenic		0	0	1	1	2	9		0	0	0	0	0	0		2	1	5	1	3	0
masiRNA_u_0357	CGACGGAAUCUAAGCAGAAAAGAG	Chr5	12953247	12953270	+		repeat		24	25	11	7	7	10		0	0	1	0	0	0		23	8	13	5	7	4
masiRNA_u_0358	CAAACCUUUGACUGUGCUAGUGAA	Chr5	13657874	13657897	+		intergenic		7	15	9	11	7	18		1	1	0	2	0	0		26	27	9	19	7	4
masiRNA_u_0359	CUAAAUAUGGGCUAAUUGAUAAAU	Chr5	13752231	13752254	+		repeat		7	23	2	3	1	9		1	1	0	0	0	0		7	11	5	6	1	3
masiRNA_u_0360	CUAGGCAAGAAGAACUAUAGAAAG	Chr5	13752305	13752328	+		repeat		21	42	13	15	5	19		0	0	1	0	0	0		32	16	23	18	6	11
masiRNA_u_0361	CAGUGACAUAUUGUUGAACGUGAU	Chr5	16027537	16027560	+		repeat		4	26	3	18	4	30		0	0	0	0	0	0		27	30	15	9	4	19
masiRNA_u_0362	CUAUGCUUCCUUUCGUGAUCUGAA	Chr5	16744511	16744534	+		gene		5	20	8	11	5	14		0	4	0	1	0	0		29	22	23	10	6	8
masiRNA_u_0363	CAAAUUUGUGUGAAGUAAGAUGAA	Chr5	17802184	17802207	+		24-PHAS		0	0	43	99	71	321		0	0	1	0	0	0		0	0	0	0	0	1
masiRNA_u_0364	CUUUUAAUUUUGACGUGAACUAAA	Chr5	18884058	18884081	+		repeat		16	19	17	16	20	29		0	0	0	1	0	0		18	33	15	15	7	17
masiRNA_u_0365	CUUUUCGCUGACGACUGUCAUAAC	Chr5	20691258	20691281	+		gene		17	18	17	10	11	11		0	0	0	0	0	0		25	18	11	12	10	6
masiRNA_u_0366	CUAGCUUCUGAAAAUCUGAAAAAG	Chr5	21658431	21658454	+		repeat		0	1	0	3	6	7		0	0	0	0	0	0		8	1	3	3	2	3
masiRNA_u_0367	CAGAAUAACAUGAACAGAUCAAAU	Chr5	21660244	21660267	+		repeat		2	6	0	8	2	13		0	0	0	0	0	0		5	5	4	2	3	6
masiRNA_u_0368	CUAGACCGUCUGUAGACUACCCCU	Chr5	21661308	21661331	+		repeat		21	30	14	20	11	23		0	1	0	0	0	0		25	15	16	14	12	8
masiRNA_u_0369	CUAGGACCUUUAAGCAAAACUGAU	Chr5	23490478	23490501	+		repeat		4	8	4	6	4	13		0	0	0	0	0	0		1	0	0	0	0	0
masiRNA_u_0370	CAAGACACAUGUGCUCUCUGCAAG	Chr5	23978201	23978224	+		intergenic		14	14	8	10	7	10		0	0	0	0	0	0		1	0	0	0	0	0
masiRNA_u_0371	CUUAAUAUUUUACUCUGACAUGUG	Chr5	25355055	25355078	+		intergenic		1	1	5	2	3	10		0	0	0	0	0	0		2	2	2	3	2	2
masiRNA_u_0372	CAAUAGAUUAAUGAACGUGUUCAG	Chr5	25614832	25614855	+		repeat		2	10	0	2	6	6		0	0	0	0	0	0		13	5	3	4	3	3
masiRNA_u_0373	CAAAAGAAUCUCGAGCAAAUAAAG	Chr5	27159644	27159667	+		intergenic		7	8	2	5	3	9		0	0	0	0	0	0		8	2	9	6	2	4
masiRNA_u_0374	CUUCCGUCCCUCAACUUAGAAAAA	Chr5	28107241	28107264	+		repeat		8	11	10	3	8	11		0	0	0	0	0	0		9	7	7	0	8	6
masiRNA_u_0375	CUAUCUGUUUUACAUCUGUAUUCC	Chr5	3237749	3237772	+		repeat		1	7	7	3	3	5		0	0	0	0	0	0		2	9	6	0	2	1
masiRNA_u_0376	CUAGAAUCUGUAGUUACCAGAAGU	Chr5	5316395	5316418	+		repeat		1	3	3	7	1	4		0	0	0	0	0	0		8	2	4	4	0	1
masiRNA_u_0377	CAGAGACGACGAUAGUGUAAAGAU	Chr5	13752162	13752185	+		repeat		13	39	1	14	3	6		0	7	1	1	0	2		21	16	16	5	2	5
masiRNA_u_0378	CAAAUAUAGAAUGAAUCUGGACAG	Chr5	14823041	14823064	+		repeat		2	7	5	7	5	3		0	0	0	0	0	0		15	4	9	2	8	10
masiRNA_u_0379	CUGACGACUUUAGGCUAAACCUAU	Chr5	15727638	15727661	+		repeat		4	7	8	10	2	3		0	0	0	0	0	0		4	9	2	7	4	4
masiRNA_u_0380	CAAUUUAUCGUAUUCAGACAUGCU	Chr5	16744473	16744496	+		gene		1	5	6	5	2	3		0	0	0	0	0	0		6	2	1	1	2	0
masiRNA_u_0381	CUUUCCAUGUCGGUAUUAAGUCGU	Chr5	18960140	18960163	+		gene		1	12	9	7	0	3		0	0	0	0	0	0		6	5	8	1	2	5
masiRNA_u_0382	CAGUACUACAAAUCUGGACAGGAG	Chr5	19113927	19113950	+		repeat		9	4	5	5	2	5		0	0	0	0	0	0		6	7	4	4	1	0
masiRNA_u_0383	CAACGGCGUCAAAUAUUUAGAAAU	Chr5	25928867	25928890	+		repeat		1	3	4	6	5	4		0	0	1	0	0	0		6	2	2	0	2	1
masiRNA_u_0384	CAAAAUGAAUUAGAGAGACGGAGC	Chr5	863171	863194	+		repeat		5	6	5	0	2	2		0	0	0	0	0	0		2	2	1	0	1	0
masiRNA_u_0385	CUACUAUGCGUUGUGAGUGUCUGC	Chr5	2212179	2212202	+		repeat		5	7	2	1	2	3		0	0	0	0	0	0		5	7	2	5	2	1
masiRNA_u_0386	CUAUAUUAAGUUAGACAGUUGAAU	Chr5	2985787	2985810	+		intergenic		4	6	1	8	0	8		0	0	0	0	0	0		5	3	4	7	1	2
masiRNA_u_0387	CUAGGGUGUAAUAAAUUUUGACGU	Chr5	3035644	3035667	+		repeat		12	3	4	4	2	3		0	0	0	0	0	0		3	3	4	1	1	2
masiRNA_u_0388	CAAGGACACGAAGCUAAGAUAAGC	Chr5	6877018	6877041	+		repeat		8	10	0	1	1	1		0	0	0	0	0	0		7	4	1	3	1	0
masiRNA_u_0389	CUAUCGAGCGUAGAGGAAGACGAG	Chr5	7979276	7979299	+		repeat		5	5	1	1	4	3		0	1	0	0	0	0		6	5	0	1	2	2
masiRNA_u_0390	CGAACUCUUACUUCAUACCCGGAU	Chr5	13752442	13752465	+		repeat		4	17	5	3	1	1		0	1	1	0	0	1		9	4	7	4	0	1
masiRNA_u_0391	CAUGGUAUCUACGUGUGGGACAAG	Chr5	14587278	14587301	+		intergenic		7	5	3	1	5	3		0	0	0	0	0	1		5	3	4	2	3	3
masiRNA_u_0392	CAAAAAUAGCGUGUCUCUCCCCAU	Chr5	15887581	15887604	+		repeat		7	4	4	0	0	1		0	0	0	0	0	0		1	3	1	0	1	0
masiRNA_u_0393	CUACAAAUCUGGACAGGAGACAUG	Chr5	19113932	19113955	+		repeat		8	9	5	4	2	2		0	0	0	0	1	0		2	3	2	4	1	4
masiRNA_u_0394	CGAUCUCUACUGCGCGUAACCGAA	Chr5	21660647	21660670	+		repeat		7	5	7	1	6	1		0	0	0	0	0	0		6	11	2	4	0	4
masiRNA_u_0395	CAUGUCAAUGCCACGUGGGACGAA	Chr5	22190529	22190552	+		repeat		2	13	2	3	0	5		0	2	0	0	0	0		10	5	3	1	1	2
masiRNA_u_0396	CUAUUUUGUUUGGUUGUGGGACAU	Chr5	28282714	28282737	+		repeat		1	9	0	3	1	1		0	0	0	0	0	0		4	0	1	2	3	2
masiRNA_u_0397	CUUUUGCUUGUACUGUUUGACCAC	Chr5	28845573	28845596	+		repeat		9	3	5	3	5	4		0	0	0	0	0	0		1	5	3	1	3	4
masiRNA_u_0398	CAACCAACAGACGAGACGAGUGAC	Chr6	276361	276384	+		intergenic		1	11	3	4	6	8		0	0	0	0	0	0		0	0	0	1	9	2
masiRNA_u_0399	CGAGACGUGGUACCAAAAUAAAAA	Chr6	1661281	1661304	+		24-PHAS		0	0	2	4	11	30		0	0	0	0	0	0		0	0	0	0	0	0
masiRNA_u_0400	CGAGAUACUUUUAGCUAGACUGAA	Chr6	2388141	2388164	+		repeat		3	3	3	3	5	10		0	0	0	0	0	0		3	6	3	6	3	5
masiRNA_u_0401	CUAAAAUGUGUCGUGCUACAGUAU	Chr6	2397584	2397607	+		intergenic		8	6	12	18	8	9		0	0	0	0	0	0		33	37	28	13	3	9
masiRNA_u_0402	CUAAAACUGUUUGGCUAGACUCCA	Chr6	2837205	2837228	+		repeat		4	5	5	5	4	15		0	0	0	0	0	0		14	11	12	6	5	4
masiRNA_u_0403	CGAGACAUUUCAUAGUACAAUGAA	Chr6	4576991	4577014	+		repeat		2	6	4	14	1	28		0	0	0	0	0	0		11	13	5	15	10	7
masiRNA_u_0404	CAAGACAUGAUACCCUGUAGGUAC	Chr6	5368983	5369006	+		intergenic		3	5	2	8	2	9		0	0	0	0	0	0		4	9	4	4	5	0
masiRNA_u_0405	CAAGUAUGUAAGAAUUUUAAAGGC	Chr6	6193447	6193470	+		intergenic		7	12	3	3	3	9		0	0	0	0	0	0		10	5	5	4	0	0
masiRNA_u_0406	CUAUCUCUCGUUUUGUAUUACGUC	Chr6	6374934	6374957	+		gene		23	16	35	10	16	16		0	0	0	0	0	0		15	15	11	12	0	7
masiRNA_u_0407	CUUACGUGGCAAUUGUAUAUCAAC	Chr6	7539133	7539156	+		repeat		0	1	2	3	3	9		0	0	0	0	0	0		0	0	1	2	3	4
masiRNA_u_0408	CUAAUACUACAAAUCUGGACAGGU	Chr6	8950054	8950077	+		repeat		3	16	6	3	1	11		0	0	0	0	0	0		6	7	6	2	2	3
masiRNA_u_0409	CAACCGAGACUAAAGAUAGAUUUU	Chr6	11302019	11302042	+		repeat		2	2	6	4	7	5		0	0	0	0	0	0		2	0	1	2	0	2
masiRNA_u_0410	CUCAGUGCGGAAUUAUCUGGCAAG	Chr6	11303804	11303827	+		repeat		0	1	2	0	7	5		0	0	0	0	0	0		0	1	2	0	1	2
masiRNA_u_0411	CAUUUUCGUGUGCGGACCCUUAAG	Chr6	11404622	11404645	+		repeat		169	125	79	32	89	68		1	1	0	0	0	0		99	93	66	31	28	16
masiRNA_u_0412	CUACUGUAGUACAAUAUUAAUGAC	Chr6	12134234	12134257	+		intergenic		5	7	6	5	6	9		0	0	0	0	0	0		7	4	8	5	3	4
masiRNA_u_0413	CAUGUUGGUUUUGAAGGAAAUGAC	Chr6	13330558	13330581	+		gene		19	27	12	18	9	9		1	0	0	0	0	1		30	25	8	18	5	6
masiRNA_u_0414	CUAUCGGCCUGUCACGGUCUCGUG	Chr6	13428497	13428520	+		intergenic		6	5	12	5	9	23		0	0	0	1	0	0		4	7	8	13	6	10
masiRNA_u_0415	CUGUUUUCAUGUGACCUUAGGAAU	Chr6	13429343	13429366	+		gene		1	0	3	5	6	9		0	0	0	0	0	0		5	1	6	1	5	4
masiRNA_u_0416	CUUGAGACUUAAUUUAUGAACACA	Chr6	13429432	13429455	+		gene		2	2	3	14	4	17		0	0	0	0	0	0		5	5	9	5	4	10
masiRNA_u_0417	CUUCUCAUUGUUACUUUGCACACA	Chr6	13429732	13429755	+		gene		1	4	3	3	9	11		0	0	0	1	0	0		7	4	5	8	3	7
masiRNA_u_0418	CAAGGAUCAGUGUUCGGAAGACUC	Chr6	15583498	15583521	+		repeat		2	3	2	1	1	9		0	0	0	0	0	0		2	1	3	1	2	1
masiRNA_u_0419	CGGAUUAUUAAAUUUGGACACAGA	Chr6	15651240	15651263	+		repeat		4	21	4	13	3	10		1	0	0	0	0	0		22	12	16	15	6	10
masiRNA_u_0420	CAGAUCUUUGUAGUUGAACCCAGA	Chr6	17991592	17991615	+		repeat		24	3	8	6	6	9		0	1	0	0	1	0		8	14	9	1	1	1
masiRNA_u_0421	CUACGACUGGUAGAAAAAGCUAGC	Chr6	19758217	19758240	+		repeat		2	4	3	0	3	11		0	0	0	0	0	0		3	3	3	1	0	1
masiRNA_u_0422	CUAUCAUGAUUUUAGGGCACGGAU	Chr6	20875473	20875496	+		repeat		4	6	3	1	3	8		0	0	1	0	0	0		3	6	3	1	2	1
masiRNA_u_0423	CAAGCGAACGACUACCGACACCGG	Chr6	21520321	21520344	+		repeat		7	8	4	0	5	6		0	0	0	0	0	0		7	4	2	2	1	3
masiRNA_u_0424	CAUGUGUUCAUAACGGCUUUUGAG	Chr6	22535079	22535102	+		repeat		43	42	12	12	6	11		0	0	0	0	0	0		33	29	12	9	1	5
masiRNA_u_0425	CUAACCACUGUUGAGAGAACCAAG	Chr6	22645440	22645463	+		repeat		11	12	4	5	6	11		0	0	0	1	0	0		17	6	10	3	5	8
masiRNA_u_0426	CUUGGAUGUUAUGUAGGAACCAUG	Chr6	22707949	22707972	+		repeat		2	6	5	2	4	12		0	0	0	0	0	0		8	13	2	5	5	2
masiRNA_u_0427	CUGGUUUCUGUGUUUUAUGAUGAG	Chr6	24560245	24560268	+		intergenic		15	14	12	4	13	13		0	1	0	0	0	1		16	16	7	7	6	4
masiRNA_u_0428	CGAUCCGAUUCUGUACGUACACGC	Chr6	24701102	24701125	+		intergenic		115	45	33	19	15	16		0	21	3	0	0	1		30	21	20	16	10	13
masiRNA_u_0429	CUUUUACACGAAGUGAGGACGAAU	Chr6	24965280	24965303	+		intergenic		6	15	3	8	6	4		0	0	0	0	1	0		6	7	11	8	7	11
masiRNA_u_0430	CGAGAAAAUGUGAAACUGACCGAG	Chr6	25303867	25303890	+		repeat		14	12	4	3	9	5		0	0	0	0	0	0		14	9	5	6	3	5
masiRNA_u_0431	CUACAACUGUCCAAGGACGCUACG	Chr6	25428175	25428198	+		24-PHAS		0	0	7	4	7	16		0	0	2	0	1	0		0	0	0	0	0	0
masiRNA_u_0432	CAAUAUUGUAGGGUUCAAACAGAU	Chr6	25428353	25428376	+		24-PHAS		0	0	1	4	3	8		0	0	0	0	0	0		0	0	0	0	0	0
masiRNA_u_0433	CAUAUUGAUCUAGUACAUAGUAAU	Chr6	25434538	25434561	+		24-PHAS		0	0	1	11	8	26		0	0	0	0	0	0		0	0	0	0	0	0
masiRNA_u_0434	CAUUCGGGUGUCAUUUCUUAAAAU	Chr6	25444220	25444243	+		repeat		22	56	17	26	20	27		0	1	0	0	1	0		58	35	40	22	17	27
masiRNA_u_0435	CAACUUUAAGGGGAACUACGACAU	Chr6	25509736	25509759	+		24-PHAS		1	1	1	5	3	7		0	0	0	0	0	0		2	1	0	1	0	0
masiRNA_u_0436	CAUCGUGUCGUAGAUAUAUUUGCU	Chr6	25517366	25517389	+		24-PHAS		0	0	3	7	3	7		0	0	0	0	1	0		0	0	0	0	0	0
masiRNA_u_0437	CUUCCGAAGGUACUCGUAGACAUG	Chr6	27384129	27384152	+		repeat		24	24	21	9	23	27		0	0	0	0	0	0		14	12	18	6	8	12
masiRNA_u_0438	CUACGGACACCGGUUUCACCACAG	Chr6	27807425	27807448	+		intergenic		2	0	1	0	6	4		0	0	0	0	0	0		0	0	0	2	2	0
masiRNA_u_0439	CAGGAUGAACUAGUAGAAGGACAG	Chr6	27808469	27808492	+		intergenic		1	2	3	4	2	8		0	0	0	0	0	0		0	3	4	1	1	2
masiRNA_u_0440	CGUACAUGGCGUGCAACUGAAAAU	Chr6	28324389	28324412	+		intergenic		1	0	3	5	7	6		0	0	1	0	0	0		0	0	1	2	6	2
masiRNA_u_0441	CUACCCCCUGAUAUGUAGACCAUC	Chr6	28517292	28517315	+		intergenic		1	0	4	0	10	3		0	0	0	0	0	0		2	0	0	0	8	1
masiRNA_u_0442	CGACUAAAUAUGAUUGGAACUAAU	Chr6	28517453	28517476	+		intergenic		1	1	2	4	4	9		0	0	0	0	0	0		0	0	3	4	2	7
masiRNA_u_0443	CAAGACGAGAUUGUGAAAACGAAU	Chr6	28538612	28538635	+		repeat		5	17	0	2	5	11		0	0	0	0	0	0		8	9	2	5	6	5
masiRNA_u_0444	CGAGCUACACCAAAAGGAUCUGAA	Chr6	29377937	29377960	+		repeat		0	0	2	1	4	7		0	0	0	0	0	0		4	1	2	4	0	1
masiRNA_u_0445	CUACACCAAAAGGAUCUGAAACAG	Chr6	29377941	29377964	+		repeat		15	24	29	33	46	64		0	0	1	0	0	0		28	15	54	23	35	41
masiRNA_u_0446	CAAGAAGAUGAAAUCUGCAAUGCC	Chr6	29378041	29378064	+		repeat		3	8	13	12	10	8		0	0	0	0	0	0		2	6	7	9	8	4
masiRNA_u_0447	CAAACAUCCGAUGUGACAGGGACU	Chr6	30784094	30784117	+		repeat		4	13	3	8	2	17		0	1	1	0	0	2		13	27	16	8	7	4
masiRNA_u_0448	CUAUCCCACCAAAAUUCCCACGUC	Chr6	3974996	3975019	+		repeat		8	3	5	6	6	2		0	0	0	1	0	0		5	2	4	2	7	4
masiRNA_u_0449	CUAGAACUACGAAUCUGAAUAGAC	Chr6	4146834	4146857	+		repeat		3	2	4	6	1	7		0	0	0	0	0	0		3	2	1	1	2	1
masiRNA_u_0450	CUAAGGGACUUGGUUUGCACUGGU	Chr6	5376069	5376092	+		repeat		8	10	7	8	0	6		0	0	0	0	0	0		13	10	5	8	5	5
masiRNA_u_0451	CUAUCGACAUACGUACAACAAAGC	Chr6	11303938	11303961	+		repeat		2	1	3	9	2	3		0	0	1	0	0	0		4	0	4	4	4	4
masiRNA_u_0452	CAAAGACAUGAUUGUUCGGCAGAU	Chr6	11979238	11979261	+		intergenic		5	11	3	8	0	2		0	1	0	0	0	0		5	4	2	5	3	1
masiRNA_u_0453	UUAGGGCUAAUUCAGCAUGAACAU	Chr6	21164895	21164918	+		gene		2	3	5	5	2	5		0	0	0	0	0	0		1	3	2	7	3	5
masiRNA_u_0454	CUUCCGAUUGAUAACUUUUGUAGU	Chr6	22690386	22690409	+		repeat		1	1	6	4	2	1		0	0	0	0	0	0		1	1	2	1	1	0
masiRNA_u_0455	CUAAGCGUGUGUAUAUUUCUCGAG	Chr6	24700715	24700738	+		intergenic		5	6	7	3	1	5		0	1	0	0	0	0		4	2	2	2	1	1
masiRNA_u_0456	CAAACGUUGGACACGGAAACCAGG	Chr6	30370346	30370369	+		repeat		3	4	8	2	3	5		0	1	1	0	0	0		2	5	4	3	1	4
masiRNA_u_0457	CAACCAACCAACAGACGAGACGAG	Chr6	276357	276380	+		intergenic		14	11	1	2	3	3		1	0	0	0	0	0		0	0	0	0	4	2
masiRNA_u_0458	CAGAUACGUUGUGACUAGGACAUG	Chr6	454276	454299	+		repeat		5	9	4	3	3	6		0	0	0	0	0	0		6	10	8	4	2	3
masiRNA_u_0459	CAACGGCGUCGACUAUUAAAAAAU	Chr6	1801012	1801035	+		repeat		4	7	4	1	3	4		0	0	0	0	0	0		1	3	5	2	1	1
masiRNA_u_0460	CUGCGCUAUGUAGAAUGACUUUGC	Chr6	3117848	3117871	+		repeat		5	11	1	7	2	3		0	0	0	0	0	0		7	7	1	5	1	2
masiRNA_u_0461	CAAUUCAUUACUGUACGAUCCUAC	Chr6	4708448	4708471	+		repeat		2	8	1	4	2	7		0	0	0	0	0	0		5	4	1	3	0	2
masiRNA_u_0462	CACAAAAAAAAUGAGCUCCAACAG	Chr6	8163407	8163430	+		repeat		7	3	0	4	0	2		0	0	0	0	0	0		3	3	3	1	1	1
masiRNA_u_0463	CCACCUAUCCUCAAACCAAACACC	Chr6	11092112	11092135	+		repeat		4	7	1	0	2	2		0	1	0	0	0	0		1	0	4	2	1	1
masiRNA_u_0464	CUACCGUGGUUAUAAGAAUCUGUU	Chr6	11482035	11482058	+		intergenic		4	14	6	3	1	3		0	0	0	1	0	0		12	8	7	7	3	4
masiRNA_u_0465	CUUCCCGAUAAUGAUAGCCUCAGU	Chr6	11979299	11979322	+		intergenic		23	31	2	5	2	2		1	0	0	0	0	0		15	2	2	3	0	2
masiRNA_u_0466	CUGAAGAAGAAGACGAACAAUAAG	Chr6	11979637	11979660	+		intergenic		7	4	0	0	0	0		0	0	0	0	0	0		2	2	1	0	0	0
masiRNA_u_0467	CUAACCUUUGAAUUACUUAACCCU	Chr6	14013788	14013811	+		repeat		6	9	2	4	0	2		0	0	0	0	0	0		7	4	5	3	1	0
masiRNA_u_0468	CGAACGAACCCUGUGCCUAGCUGU	Chr6	14596291	14596314	+		intergenic		4	6	0	1	1	2		0	0	0	0	0	0		4	1	0	0	0	0
masiRNA_u_0469	CUAUGUGUCGAUGUAUCUUUCUAU	Chr6	16309767	16309790	+		intergenic		4	8	1	8	1	6		0	0	0	0	0	0		9	5	9	3	3	1
masiRNA_u_0470	CGAUACCUUGUAAUACUCCCGAGU	Chr6	17731656	17731679	+		repeat		7	12	2	2	3	1		1	1	0	0	0	1		7	1	4	0	3	2
masiRNA_u_0471	CAAGGAAAGAAAAUGGGAGACAUG	Chr6	17866215	17866238	+		intergenic		9	12	1	2	2	1		0	1	0	0	0	0		1	3	1	1	0	0
masiRNA_u_0472	CUAAAUUUGGGUGGACGUGUCAAU	Chr6	20953063	20953086	+		repeat		1	9	0	2	0	3		0	0	0	0	0	0		1	0	1	1	1	0
masiRNA_u_0473	CAAGACUAACAUGCACGUGCUCGC	Chr6	22768837	22768860	+		repeat		6	6	6	2	2	0		0	0	0	0	0	0		5	5	1	3	2	2
masiRNA_u_0474	CGAUGUAAAAAAAAAUCGGACGGU	Chr6	23301158	23301181	+		intergenic		5	11	4	2	2	3		0	1	0	0	0	0		1	6	1	0	1	1
masiRNA_u_0475	CAACAAUAUUGUCACGUGGCUCCC	Chr6	23442584	23442607	+		intergenic		7	3	0	1	0	1		0	0	0	0	0	0		1	1	2	1	0	1
masiRNA_u_0476	CAUGGCGUGAUAAAGUGAAUUGGU	Chr6	23466346	23466369	+		intergenic		3	8	4	0	0	2		0	0	0	0	0	0		2	3	0	1	0	2
masiRNA_u_0477	CUGUAUGUAAAUGACUGAGCUAAG	Chr6	24701562	24701585	+		intergenic		4	13	2	4	1	2		0	0	0	0	0	0		14	6	6	0	1	1
masiRNA_u_0478	CUAUCAGAUUUUGACGACUUUAAC	Chr6	24887780	24887803	+		intergenic		2	8	1	4	1	4		0	0	0	0	0	0		10	4	10	7	3	3
masiRNA_u_0479	CUUUUUUUUUAAUAUGUCAGACGU	Chr6	25509517	25509540	+		24-PHAS		2	8	2	1	0	0		0	0	0	0	0	0		3	1	1	2	0	1
masiRNA_u_0480	CUGAACAAAAAACUGGAUCGCCAU	Chr6	27134932	27134955	+		repeat		4	6	1	2	1	0		0	0	0	0	0	0		3	2	0	2	0	1
masiRNA_u_0481	CAAAUAAACUAGUAGUGCGCCAUA	Chr6	27512810	27512833	+		intergenic		6	5	0	2	0	0		0	0	0	0	0	0		0	3	0	1	0	1
masiRNA_u_0482	CAAGGAACGUGUGUGCUCAGCUCU	Chr6	27513226	27513249	+		repeat		9	25	3	4	1	1		0	1	0	0	0	0		15	8	5	4	1	3
masiRNA_u_0483	CUAGUGUAUUGUAAUCGGACCAGU	Chr6	27998008	27998031	+		repeat		3	8	3	2	4	4		0	0	0	0	0	1		8	9	3	2	1	2
masiRNA_u_0484	CUAUGACACCUAUCCUGUAGACAG	Chr6	28840336	28840359	+		intergenic		7	6	3	3	4	2		0	0	0	0	0	0		2	1	0	1	1	6
masiRNA_u_0485	CUAACACACAUGCACCCUCCCAAC	Chr6	29455751	29455774	+		intergenic		7	18	6	2	0	1		0	0	0	0	0	0		6	4	7	1	1	1
masiRNA_u_0486	CUUCCAAUCCUUUCUAACCACGAC	Chr6	29455827	29455850	+		intergenic		5	5	1	1	0	0		0	1	0	0	0	0		1	0	1	2	0	1
masiRNA_u_0487	CAAUCCGGCUAUAAGUUAAUUUAC	Chr6	30786943	30786966	+		repeat		8	3	5	2	7	2		0	0	0	0	0	0		4	2	4	4	2	1
masiRNA_u_0488	CAUGUCCCUCUUUGUCUAAACAAU	Chr6	30886446	30886469	+		intergenic		0	20	1	3	2	4		0	0	0	0	0	0		0	0	0	0	0	0
masiRNA_u_0489	CCUUUUAAAGAUGUGGGGCUAGAG	Chr7	2518246	2518269	+		gene		5	16	4	8	4	11		0	0	0	0	0	0		20	8	10	4	11	10
masiRNA_u_0490	CAAGACAAAGUAUAACCUCACAUG	Chr7	3641121	3641144	+		intergenic		6	9	10	9	2	11		0	2	0	0	0	0		12	8	11	8	2	6
masiRNA_u_0491	CGAAGAGAUUAUGAACCAAAUGAG	Chr7	4259651	4259674	+		repeat		7	6	7	2	5	13		0	0	0	0	0	0		8	4	10	5	1	8
masiRNA_u_0492	CUAUGUCAUGUACUCUUGUAAUCC	Chr7	4350307	4350330	+		gene		0	0	1	2	2	9		0	0	0	0	0	0		0	1	1	2	3	6
masiRNA_u_0493	CAAUCUGAUCAUGAAAGCUGGAAG	Chr7	4374079	4374102	+		intergenic		1	3	5	1	4	9		0	0	0	0	0	0		2	1	4	2	3	6
masiRNA_u_0494	CAUUUCAUUAUUGUCUCCCCCAUC	Chr7	4374290	4374313	+		intergenic		2	2	0	0	4	6		0	0	0	0	0	0		1	1	1	2	2	3
masiRNA_u_0495	CAAGACAACUCAGGGAUCAAAUGA	Chr7	4375083	4375106	+		intergenic		3	1	5	3	5	9		0	0	0	0	0	0		2	3	2	1	4	7
masiRNA_u_0496	CAAACUUCCAAUGUUGACGUGAAC	Chr7	4734376	4734399	+		repeat		3	10	9	9	7	22		0	0	0	0	0	0		12	22	15	10	3	7
masiRNA_u_0497	CUUCCAAUGUUGACGUGAACUAAA	Chr7	4734380	4734403	+		repeat		3	6	2	7	1	10		0	1	0	0	0	0		7	6	5	6	2	2
masiRNA_u_0498	CUAGCUGAUAGAAUGUUCUAUAUC	Chr7	6198337	6198360	+		intergenic		0	0	1	4	3	8		0	0	0	0	0	0		0	0	0	0	0	0
masiRNA_u_0499	CCAAUUUAAGUGAAACUCGACGGU	Chr7	8475602	8475625	+		repeat		10	14	11	5	4	6		0	1	0	0	0	0		8	6	1	4	2	1
masiRNA_u_0500	CCAACAGUCGACGUCGGAGACGAU	Chr7	8656606	8656629	+		repeat		16	29	10	10	1	9		0	1	0	0	0	0		15	23	7	5	1	4
masiRNA_u_0501	CUAGGACUUCUUAGCUGAUGCUAU	Chr7	15989832	15989855	+		intergenic		0	7	3	6	6	9		0	0	0	0	0	0		3	2	8	1	5	9
masiRNA_u_0502	CGACCGUGUGAGCCUCUGAAUAAU	Chr7	22891853	22891876	+		repeat		16	27	13	10	16	13		0	0	0	0	2	0		23	19	10	8	5	13
masiRNA_u_0503	CUUGAAAACUAUCGUUAGAUUGAG	Chr7	25133883	25133906	+		repeat		1	6	3	3	1	9		0	0	1	0	0	0		6	7	10	8	3	7
masiRNA_u_0504	CUAUCGUUAGAUUGAGAAAUGGAU	Chr7	25133891	25133914	+		repeat		8	17	5	17	3	11		0	0	0	0	0	0		20	16	13	16	4	17
masiRNA_u_0505	CGAUCCAACAAAAAGUACUUUGAG	Chr7	26804870	26804893	+		repeat		28	32	40	22	33	39		1	0	0	0	1	0		36	30	32	21	17	17
masiRNA_u_0506	CAAGCUGACAUGUGCACUGAGAGU	Chr7	27026178	27026201	+		intergenic		5	3	0	3	5	6		0	0	0	0	0	0		2	1	2	2	0	3
masiRNA_u_0507	CUUCCUUUUCAAGUAGAACUCGGA	Chr7	27568754	27568777	+		intergenic		0	2	4	0	1	12		0	0	0	0	0	0		5	6	3	2	1	3
masiRNA_u_0508	CCAACCGAUAUUGUUACAACUGAU	Chr7	27994970	27994993	+		intergenic		0	3	2	4	5	5		0	0	0	0	0	0		2	3	3	1	1	3
masiRNA_u_0509	CUAGUCGAGACUGUCCCGAAGGAU	Chr7	8831335	8831358	+		gene		5	9	3	7	0	3		0	0	0	0	0	0		4	4	3	4	3	5
masiRNA_u_0510	CAUCGAAAAUCCGACGCGUAGACG	Chr7	8988958	8988981	+		intergenic		9	24	4	6	0	8		0	1	0	1	0	0		52	38	18	12	10	9
masiRNA_u_0511	CGAGGAAAUUAAAUGAAGAAUGAU	Chr7	20191959	20191982	+		repeat		7	16	5	9	2	5		0	1	0	0	0	0		8	5	2	6	2	5
masiRNA_u_0512	CUAAGACUAGACGAGACACCUCCU	Chr7	22020641	22020664	+		intergenic		4	6	7	4	5	4		0	0	0	0	0	0		5	6	1	0	1	1
masiRNA_u_0513	CAACGUCGUUAACUUUUUUAUAAC	Chr7	24781703	24781726	+		repeat		2	0	5	7	4	1		0	0	1	0	0	0		1	2	1	4	0	1
masiRNA_u_0514	CUUCUACUUAUUGUAUCGCUCUAC	Chr7	26517538	26517561	+		intergenic		2	5	6	7	2	5		0	0	0	0	0	0		0	2	6	1	1	1
masiRNA_u_0515	CAUCGAAUCUUUGAACACACGCAU	Chr7	27502221	27502244	+		repeat		0	5	4	7	5	3		0	0	0	0	0	0		6	4	2	0	0	3
masiRNA_u_0516	CGGUCAAACUUAAACAUGAACAGU	Chr7	29039083	29039106	+		repeat		6	6	5	11	4	5		0	0	0	0	0	0		9	7	3	5	3	2
masiRNA_u_0517	CUAUCCGAUCGUAUGUUGCAAUAU	Chr7	482448	482471	+		repeat		3	8	4	5	3	2		0	0	0	0	0	0		8	5	3	2	2	0
masiRNA_u_0518	CUUCUCGAAAUUGUCGCACUACGC	Chr7	1664791	1664814	+		repeat		4	6	2	1	1	2		0	0	0	0	0	0		4	2	2	0	0	2
masiRNA_u_0519	CUAUUCGUUAUUUGUGCAUUGGAG	Chr7	3220980	3221003	+		repeat		5	8	2	5	2	5		0	0	0	0	0	0		9	5	9	7	2	4
masiRNA_u_0520	CGAUUAAUUUUAGAACGGUAACAU	Chr7	3572710	3572733	+		repeat		3	12	1	8	0	9		0	1	0	0	0	0		6	4	4	2	6	3
masiRNA_u_0521	CAAACUCUGUCAUAUCUUAAUGGG	Chr7	4058050	4058073	+		gene		8	8	5	3	2	3		0	1	0	1	0	1		14	32	4	4	2	1
masiRNA_u_0522	CUUUACCAUUGUGAAGGACUGGAG	Chr7	4596926	4596949	+		gene		3	10	1	4	4	1		0	0	0	0	0	0		15	12	10	4	6	7
masiRNA_u_0523	CAUCCUAACUAUGAACCUAGACGC	Chr7	5410229	5410252	+		repeat		4	7	2	1	0	4		0	0	0	0	0	0		2	8	1	1	1	0
masiRNA_u_0524	CUUCUUUCUGUUAACCCGUGUAAU	Chr7	8949047	8949070	+		repeat		4	6	2	1	0	7		0	0	0	0	0	0		4	1	3	1	0	3
masiRNA_u_0525	CUUAUAUUGUGGGACGAGUAGAAG	Chr7	9106494	9106517	+		repeat		5	6	1	3	2	5		0	0	0	0	0	0		3	1	2	1	3	1
masiRNA_u_0526	CUAGGGAUCUGUUUGUAAAAUAAG	Chr7	10279193	10279216	+		repeat		7	6	4	1	3	6		0	0	0	0	0	0		3	1	5	1	1	2
masiRNA_u_0527	CUUCAACUUUAAGGACCUGCCGUG	Chr7	10990043	10990066	+		repeat		7	4	2	5	9	0		0	0	0	0	0	0		2	2	2	1	1	0
masiRNA_u_0528	CUGCUUUAUAAAGAUUGGGACAUG	Chr7	16988897	16988920	+		intergenic		7	4	5	0	1	0		0	0	0	0	0	0		1	1	1	0	1	0
masiRNA_u_0529	CGAAUAUAUAAGAUGUAGACACAG	Chr7	19395273	19395296	+		intergenic		3	10	2	3	0	5		0	0	1	0	0	0		0	0	0	0	0	0
masiRNA_u_0530	CAAACUUCUGUUCCAACUUCCAAU	Chr7	20712653	20712676	+		intergenic		6	9	1	5	0	3		0	0	0	0	0	0		9	1	4	2	0	0
masiRNA_u_0531	CAUCGACACGAAGUGGGUAGACGC	Chr7	20787915	20787938	+		intergenic		11	7	3	1	2	3		0	0	0	0	0	0		9	4	8	1	4	1
masiRNA_u_0532	CUCCCUCUGUAAAAAAAAAUCAAC	Chr7	23158643	23158666	+		repeat		6	6	3	4	3	5		0	1	0	0	0	0		4	2	1	1	1	2
masiRNA_u_0533	CUUUUUUAGACUGUAGUAGAACAC	Chr7	23751569	23751592	+		intergenic		4	9	2	1	0	2		0	0	0	0	0	0		3	6	5	1	0	4
masiRNA_u_0534	CUAAUAUUACGAAUCUGGACAUGU	Chr7	24247731	24247754	+		repeat		3	7	1	2	5	0		0	0	0	0	0	0		3	2	1	1	1	2
masiRNA_u_0535	CAAGGGAUCAUGUGACAAAGGCAU	Chr7	26260372	26260395	+		gene		2	9	1	2	1	2		0	0	0	0	0	0		4	1	3	0	5	3
masiRNA_u_0536	CUUUUUAUUUUUGGUGAACUCUUC	Chr7	26767762	26767785	+		intergenic		1	10	1	4	1	2		0	0	0	0	0	0		0	0	0	0	0	0
masiRNA_u_0537	CUAAUAAAUCGACGCGUGCAUGAU	Chr7	28696615	28696638	+		intergenic		4	9	4	3	0	1		0	0	0	0	0	0		2	2	1	0	1	1
masiRNA_u_0538	CAGCGUAAAAAUGUCAGGACCGAC	Chr7	28748805	28748828	+		repeat		9	5	4	2	4	2		0	0	0	0	0	0		6	2	5	0	1	0
masiRNA_u_0539	CUUUUAAAUAGAGAGACGGACCUG	Chr7	29181757	29181780	+		repeat		12	7	4	2	1	1		0	0	0	0	0	0		2	4	2	2	1	1
masiRNA_u_0540	CUAUUGAAUUGGUAGGAUAGAGAA	Chr8	1062035	1062058	+		repeat		4	16	7	14	7	14		0	3	3	1	0	0		21	27	13	14	14	18
masiRNA_u_0541	CAACUGACCAUAAAUUUCACUGGC	Chr8	2078648	2078671	+		gene		2	2	13	5	5	9		0	0	0	0	0	0		1	0	5	2	0	1
masiRNA_u_0542	CUUAUAACCAAGGUAGUUGACGAA	Chr8	3584308	3584331	+		intergenic		4	13	2	9	2	10		0	0	0	0	0	0		10	5	11	9	6	2
masiRNA_u_0543	CUUAAUUAAAUUGAUAGGACUAAU	Chr8	6195489	6195512	+		24-PHAS		2	1	0	5	3	18		0	0	1	0	0	0		1	2	0	2	0	0
masiRNA_u_0544	CAAAACGAGAUGGUAGUAGCGUGU	Chr8	7566598	7566621	+		repeat		19	15	5	2	6	4		0	1	1	0	0	0		4	13	4	3	1	2
masiRNA_u_0545	CAAAGACGAUUCUUGAGCUCAGGA	Chr8	7668215	7668238	+		intergenic		3	4	4	3	12	5		0	0	0	0	0	0		5	4	6	1	2	2
masiRNA_u_0546	CCGGGACAUAUAUAUAGUAGACAU	Chr8	7993897	7993920	+		intergenic		10	64	25	32	15	29		0	1	2	0	0	0		26	26	39	15	11	18
masiRNA_u_0547	CGAAAUUGUGUAUGGUUGCCUGAU	Chr8	7993963	7993986	+		intergenic		8	16	10	14	3	15		0	0	0	0	0	0		19	16	11	5	10	3
masiRNA_u_0548	CGAACAGAAAAGAUCGAGACCGAG	Chr8	8120293	8120316	+		repeat		15	14	10	4	5	6		0	0	0	0	0	0		16	13	7	3	2	2
masiRNA_u_0549	CAAAAUGUUGAUAUGGGAACUGUC	Chr8	8131120	8131143	+		intergenic		20	42	14	16	14	11		0	0	0	0	0	0		28	21	23	20	6	8
masiRNA_u_0550	CGAGGAGAAUAUAAGGAAGUAAAU	Chr8	9044818	9044841	+		intergenic		0	0	4	8	9	7		0	0	1	1	0	0		0	0	0	1	0	3
masiRNA_u_0551	CGAGGAAAUAGCGAGACCGAACGG	Chr8	9193847	9193870	+		gene		29	35	13	6	9	15		0	1	1	0	0	0		32	25	9	15	3	7
masiRNA_u_0552	UUUAUUGUGCGAGACUGUUCAGUU	Chr8	9194028	9194051	+		gene		8	29	5	9	11	17		1	1	0	0	2	1		20	20	17	9	5	4
masiRNA_u_0553	CGAGACCGACAGUAUAUUUCUACC	Chr8	9194211	9194234	+		gene		16	16	25	16	8	24		3	3	3	1	0	0		18	14	15	10	6	5
masiRNA_u_0554	CGAGACAUUUUAUAGUAUUAUGAA	Chr8	9628004	9628027	+		intergenic		3	11	1	2	2	12		0	0	0	0	0	0		6	24	11	7	1	8
masiRNA_u_0555	CAUCGACAAGCACUCUAAUCCUAG	Chr8	13959197	13959220	+		repeat		38	21	17	7	17	16		0	0	0	0	1	0		28	26	16	7	8	10
masiRNA_u_0556	CUUAGAUUUAUAGUAUUAGGACGU	Chr8	14204962	14204985	+		repeat		1	6	5	5	6	10		0	0	0	0	0	0		3	6	0	3	0	2
masiRNA_u_0557	CUUCUUAGGCACUUAGGAGACGAG	Chr8	15456708	15456731	+		gene		2	5	0	5	6	10		0	0	0	0	0	0		6	3	4	6	7	5
masiRNA_u_0558	CUUUAGUUUUGAGUGUAGACUAGU	Chr8	15457572	15457595	+		gene		0	7	2	10	2	9		0	0	0	0	0	0		7	8	1	8	2	4
masiRNA_u_0559	CUAGUCUGUGGAAAGAUUCAGCGU	Chr8	15457591	15457614	+		gene		3	8	8	11	4	18		0	0	0	0	0	0		5	7	6	3	2	10
masiRNA_u_0560	CAGCGUUGGGACCAAUAAACAAAG	Chr8	15457609	15457632	+		gene		8	5	6	10	8	12		0	0	0	1	0	0		6	7	10	3	7	8
masiRNA_u_0561	CAAAUGGUAUGUGAGAGCGUAAAU	Chr8	15459206	15459229	+		repeat		2	4	7	6	7	12		0	1	0	0	1	0		6	4	6	5	4	10
masiRNA_u_0562	CAAAGGGUAUUUGAGAGCGUAAAU	Chr8	15459297	15459320	+		gene		4	7	5	7	4	22		0	0	0	0	0	0		5	5	6	4	6	4
masiRNA_u_0563	CUGCUAACCGUCGACCACAUAUUC	Chr8	15459454	15459477	+		repeat		8	5	8	3	9	9		0	0	0	1	0	0		6	3	11	2	14	3
masiRNA_u_0564	CUAACCGUCGACCACAUAUUCAAG	Chr8	15459457	15459480	+		repeat		6	2	7	13	17	12		0	0	0	0	0	0		10	3	11	8	11	13
masiRNA_u_0565	CAAUCUCGUGCAUACUUUAGUACC	Chr8	15459581	15459604	+		gene		7	2	19	9	27	22		0	0	0	0	0	0		5	6	13	12	15	17
masiRNA_u_0566	CUAGAGCUUGGAACAAUGAAGAGU	Chr8	15459728	15459751	+		gene		2	7	22	9	14	22		0	0	0	0	0	0		2	8	17	10	3	12
masiRNA_u_0567	CAUUAAGGAUCUUUGAAAAAUAAU	Chr8	15460104	15460127	+		gene		0	7	3	15	6	15		0	0	0	0	0	0		6	8	13	11	7	16
masiRNA_u_0568	CUAAAAACAAAAUGUAGGAGCAAU	Chr8	15460284	15460307	+		gene		9	15	13	28	12	17		0	0	0	0	0	0		17	7	14	17	14	18
masiRNA_u_0569	CGGGACGGGUAUAUUUUCGCAAAU	Chr8	15598239	15598262	+		gene		143	209	115	88	109	144		1	2	2	1	1	0		152	135	136	62	75	64
masiRNA_u_0570	CUUCCCAUGAAGGUAUAUAGACGU	Chr8	15598264	15598287	+		gene		10	8	11	10	5	13		0	0	0	0	0	0		2	7	4	6	1	3
masiRNA_u_0571	CUUCCUCUGUUAGUAGAAUUACGU	Chr8	17323971	17323994	+		repeat		8	22	10	17	13	15		0	0	0	1	0	0		19	26	16	10	7	11
masiRNA_u_0572	CAUCGAACGUUUGCAUAUCUGCAU	Chr8	17444002	17444025	+		repeat		3	15	7	7	2	22		0	0	0	0	0	1		13	20	8	5	5	3
masiRNA_u_0573	CAAAGCCGUGAAGUGUAACCAAAG	Chr8	18175540	18175563	+		intergenic		8	17	11	14	4	6		0	0	0	0	0	0		24	18	12	9	4	7
masiRNA_u_0574	CAUAGAAUAAACGUAGACGCUCAC	Chr8	18408519	18408542	+		intergenic		2	11	3	4	4	8		0	0	0	0	0	0		8	4	5	1	0	6
masiRNA_u_0575	CAUCGAAUCUUUGGACAUAUGCAU	Chr8	19282327	19282350	+		repeat		57	166	47	65	29	97		1	2	2	0	0	0		95	106	86	50	35	59
masiRNA_u_0576	CAAAAAUAGGUCGUGGGCUCAGCG	Chr8	21331694	21331717	+		repeat		23	15	12	6	14	7		0	0	0	0	0	0		8	8	4	2	13	5
masiRNA_u_0577	CAAAUUAAUGUAAUAGGACAGUGU	Chr8	21693647	21693670	+		intergenic		2	7	8	7	11	6		0	0	0	0	0	0		1	1	1	6	2	8
masiRNA_u_0578	CUAGGAAAAAAACGAUGUGGCAAG	Chr8	22752340	22752363	+		repeat		8	18	9	8	7	7		0	0	0	0	0	0		16	6	6	5	4	5
masiRNA_u_0579	CAGAUUUGUGUACUAUGAUGUGUC	Chr8	24490901	24490924	+		repeat		4	8	1	3	5	6		0	1	0	0	0	0		3	1	0	4	2	1
masiRNA_u_0580	CUAACGAUCAUAGACAGACCUCCG	Chr8	25694515	25694538	+		repeat		2	5	0	1	1	9		0	0	0	0	0	0		6	4	2	3	2	2
masiRNA_u_0581	CAGGAUUUUAUACAUGUAAAGAAU	Chr8	26181435	26181458	+		gene		5	12	5	20	2	9		0	0	0	0	0	0		13	11	8	15	1	8
masiRNA_u_0582	CAUCUAUAUGUGGAACCAAACAGU	Chr8	26445907	26445930	+		repeat		13	9	11	2	5	7		0	0	0	0	0	0		2	4	3	0	0	4
masiRNA_u_0583	CUUUUUCUUAGACUGUUUGACCAC	Chr8	28257811	28257834	+		repeat		2	3	5	1	6	5		0	0	0	0	0	0		2	1	4	0	0	3
masiRNA_u_0584	UAAUCUGACCCGGCGACGAUUGAG	Chr8	808792	808815	+		24-PHAS		0	0	10	17	1	6		0	0	0	1	0	1		0	0	0	0	0	1
masiRNA_u_0585	CUACCGUCCUAAAAUAUAAACUUU	Chr8	2171812	2171835	+		repeat		8	5	6	6	5	3		0	0	1	0	0	0		5	1	2	0	1	5
masiRNA_u_0586	CUUCGAUCUUUUGAUUUUCCUAAU	Chr8	11714626	11714649	+		repeat		2	12	8	3	2	0		0	0	0	0	0	0		4	8	3	5	2	0
masiRNA_u_0587	CUAUUACUAUGAAUUUGGACAAAU	Chr8	14204647	14204670	+		repeat		2	1	5	5	2	0		0	0	0	0	0	0		3	3	1	3	1	0
masiRNA_u_0588	CAGCUCAAGAUUGUGUAGAUUAUU	Chr8	15458079	15458102	+		gene		0	2	3	7	2	5		0	0	0	0	0	0		2	3	2	5	3	3
masiRNA_u_0589	CUAGAAUUUUUAAAAUGUGACGUU	Chr8	18323588	18323611	+		gene		1	7	6	5	4	2		0	0	0	0	0	0		3	4	1	1	0	0
masiRNA_u_0590	CUAGCUAAUUUUGUAGAGACCCUU	Chr8	20486419	20486442	+		repeat		1	10	4	8	0	3		0	0	0	0	0	0		0	0	0	0	0	0
masiRNA_u_0591	CAUGAAAUUUAUAAGUAGGAGAAU	Chr8	24509157	24509180	+		gene		2	13	2	8	0	5		0	0	0	0	0	0		5	3	4	5	0	2
masiRNA_u_0592	CAUGUAUGUGUAGGCUGUCCAGAU	Chr8	1685057	1685080	+		repeat		3	8	2	1	0	1		0	0	0	0	0	0		7	3	6	1	3	1
masiRNA_u_0593	CUAAAAAGACGUGUGUGAACCGGU	Chr8	2078876	2078899	+		gene		7	3	3	3	0	0		0	0	0	0	0	0		0	2	0	1	0	0
masiRNA_u_0594	CUUCGUACUUACGGUGACACCAUG	Chr8	4290041	4290064	+		repeat		6	9	3	3	5	1		0	0	1	0	0	0		5	3	3	3	0	2
masiRNA_u_0595	CAAAAAUAGACCGUGGACUCAGCG	Chr8	5886527	5886550	+		repeat		6	7	3	2	3	1		0	0	0	0	0	0		6	3	1	1	2	5
masiRNA_u_0596	CAUAUGUAUUUGGUGUUCUGUAGU	Chr8	7993918	7993941	+		intergenic		2	12	2	6	3	3		0	0	0	0	1	0		5	5	2	2	2	2
masiRNA_u_0597	CAUUAAUUAAUUGUGCUCCGAAAU	Chr8	8130823	8130846	+		intergenic		4	9	3	2	0	1		0	1	0	0	0	0		7	5	2	2	1	2
masiRNA_u_0598	CUGCCGCUGUAGUUUUAAAAUGAU	Chr8	9927409	9927432	+		repeat		5	13	3	4	2	3		0	0	0	0	0	0		12	4	6	2	2	0
masiRNA_u_0599	CUGCCGGAAUUUAUAGAAGAAGAG	Chr8	11267412	11267435	+		intergenic		3	7	0	3	1	1		0	0	0	0	0	1		7	1	2	0	2	1
masiRNA_u_0600	CGACCUGCUGCAGAUAAAGAAAGU	Chr8	11714806	11714829	+		repeat		15	14	2	3	1	3		0	5	0	0	0	0		8	6	2	1	0	0
masiRNA_u_0601	CAACGAUGUGGUACCGAUAGAGAU	Chr8	15725718	15725741	+		intergenic		5	7	3	2	3	2		0	0	0	0	0	0		3	4	0	1	0	0
masiRNA_u_0602	CUUUUGACUGUACACCAAUAAAAC	Chr8	18939786	18939809	+		gene		4	6	4	3	1	7		0	0	0	0	0	0		10	5	2	2	1	1
masiRNA_u_0603	CAAAGAAGAAUUGUUGGGACCUGC	Chr8	19720636	19720659	+		intergenic		6	7	2	1	1	2		0	0	0	0	0	0		1	6	2	0	1	1
masiRNA_u_0604	CUACACAAGGAUUGAGAAACGCAG	Chr8	20460562	20460585	+		repeat		6	4	1	3	3	2		0	0	0	0	0	0		5	3	1	2	0	1
masiRNA_u_0605	CUUUUUAUUACACUGUUUGACCAU	Chr8	20647715	20647738	+		repeat		2	14	0	5	0	2		0	0	0	0	0	0		3	2	3	0	1	1
masiRNA_u_0606	CAUAAAGUAUUAAACGUAGGCUAA	Chr8	21751669	21751692	+		repeat		3	10	2	3	1	3		0	0	0	0	0	0		9	6	3	2	0	5
masiRNA_u_0607	CUGACGAGGCUAGUUUGAUUUGAU	Chr8	23005032	23005055	+		repeat		4	11	2	3	0	2		0	0	0	0	0	0		3	6	3	0	1	0
masiRNA_u_0608	CUAUUAAAAUCGGUGCAGAAUGAC	Chr8	24441251	24441274	+		repeat		5	16	2	7	2	3		0	0	0	0	0	0		16	4	6	7	7	5
masiRNA_u_0609	CAACCAGUCAAACUCAAGCCCAAG	Chr8	24509236	24509259	+		gene		4	6	0	0	0	1		0	0	0	0	0	0		3	1	2	0	0	0
masiRNA_u_0610	CAACGAUUCAAACUCAUGCCCAAG	Chr8	24509432	24509455	+		gene		5	6	4	5	0	3		0	0	0	0	0	0		11	6	3	3	2	5
masiRNA_u_0611	CAACUGUAGGAAGAUUGUAGCCAC	Chr8	25601456	25601479	+		intergenic		6	10	5	2	5	2		0	0	0	0	0	0		11	7	1	4	0	5
masiRNA_u_0612	CUGAAGAUAGAAGAAGGAUUCCUG	Chr8	25601901	25601924	+		intergenic		4	23	2	1	0	2		0	2	0	0	0	0		5	6	2	3	5	1
masiRNA_u_0613	CGUUCGUAAGAUGUGAGGUGUGGU	Chr8	26043558	26043581	+		intergenic		4	7	2	0	0	1		1	1	0	0	0	0		2	4	2	0	1	0
masiRNA_u_0614	CGAUCCUCUGUGUACCCCUGAAAU	Chr8	26853585	26853608	+		repeat		3	9	1	3	3	3		0	0	0	0	0	0		4	1	4	1	2	1
masiRNA_u_0615	CUGAUAUGUGAAUUCUAUAGCCGU	Chr8	27059655	27059678	+		intergenic		3	12	1	0	0	1		0	0	0	0	0	0		0	0	0	0	0	0
masiRNA_u_0616	CAAACGUAUUAAACGGCACCUGAU	Chr9	2925033	2925056	+		intergenic		3	8	4	7	4	11		0	0	0	0	1	0		13	22	3	1	5	5
masiRNA_u_0617	CUGUUAUAUACUGUGAGUCGUGAG	Chr9	5940649	5940672	+		intergenic		12	26	11	16	10	24		0	0	0	0	0	0		22	18	19	9	12	11
masiRNA_u_0618	CUUGUAGUUCCUGUUCCGUUCGUG	Chr9	10837709	10837732	+		repeat		55	41	26	13	31	18		11	8	3	5	0	6		28	24	20	6	9	5
masiRNA_u_0619	CAAGGACAUAAGAUAAAUAUAGGC	Chr9	12524896	12524919	+		repeat		14	10	11	6	5	7		0	4	1	1	0	0		8	7	6	5	2	5
masiRNA_u_0620	CUAUUGUACCUGCUCUAACAGAAU	Chr9	12529950	12529973	+		repeat		6	14	3	13	7	11		0	0	0	0	1	0		12	8	14	6	2	8
masiRNA_u_0621	CAAAAUCACUAUAGGCUCCUCAGU	Chr9	12745307	12745330	+		repeat		33	16	14	11	9	11		0	0	0	0	0	0		11	12	7	6	13	5
masiRNA_u_0622	CUUCAAGACGUAGUAUGUGCAUGA	Chr9	12962211	12962234	+		repeat		2	2	8	5	5	8		0	0	0	0	0	0		2	2	1	1	0	1
masiRNA_u_0623	CAUCGACUAUUUAGACACAUGCAU	Chr9	13941946	13941969	+		repeat		3	10	2	2	3	13		0	0	0	0	0	0		7	12	6	3	3	7
masiRNA_u_0624	CUUCUAUACUGUUUUUAUUUUGGA	Chr9	14993554	14993577	+		gene		1	3	6	1	1	9		0	0	0	0	0	0		0	5	3	4	2	1
masiRNA_u_0625	CUAGUACAACGAAUCUGAUAUAUC	Chr9	15454861	15454884	+		repeat		6	4	2	1	8	2		0	0	0	0	0	0		0	4	2	2	0	3
masiRNA_u_0626	CUAUCCACUGUUAGACAUGAUGAU	Chr9	16103674	16103697	+		repeat		7	11	13	4	10	14		0	0	0	0	0	0		9	10	8	11	5	11
masiRNA_u_0627	CAAGAAAAGGUUGUUGGAAUGUAC	Chr9	16724515	16724538	+		intergenic		1	5	8	6	5	10		0	0	0	0	0	0		1	2	4	5	2	4
masiRNA_u_0628	CUUCCGAAAAAAUUUUCAUCUGUC	Chr9	16725259	16725282	+		intergenic		1	1	2	0	2	8		0	0	0	0	0	0		3	1	3	2	0	4
masiRNA_u_0629	CUAAUCCGGCUAGAAGCACUUUCU	Chr9	16725358	16725381	+		repeat		10	5	25	19	30	41		0	1	0	0	0	0		10	7	17	8	17	20
masiRNA_u_0630	CAAACUAGUAGAGUGAAGUACAUC	Chr9	16725863	16725886	+		intergenic		2	3	5	4	4	10		0	0	0	0	0	0		2	3	8	5	3	5
masiRNA_u_0631	CUUGGUCACCAUGUAGGACAUGGC	Chr9	16726020	16726043	+		intergenic		1	6	3	6	11	15		0	0	0	0	0	0		1	7	6	5	12	4
masiRNA_u_0632	CAACGAGAUGUCCGUAGUGAUGAC	Chr9	17954843	17954866	+		repeat		3	8	2	1	5	6		0	0	0	0	0	0		4	7	2	2	0	1
masiRNA_u_0633	CUAGUACGAUUAAUCUGGACAGAU	Chr9	18314499	18314522	+		repeat		6	16	5	16	6	12		0	1	0	0	0	0		10	10	6	12	3	10
masiRNA_u_0634	CUGCGUCUGUUAUUCCGAUAUAUC	Chr9	19747988	19748011	+		intergenic		4	2	7	3	8	2		0	0	0	0	0	0		1	5	2	0	0	2
masiRNA_u_0635	CUUGUAUUUUAGAACAGAAAGAGU	Chr9	20031009	20031032	+		repeat		2	9	3	4	1	9		0	0	0	0	0	0		8	6	8	4	0	3
masiRNA_u_0636	CUAAGACAACGAAUCUGGACUGAC	Chr9	20693229	20693252	+		repeat		16	22	7	5	13	23		0	0	1	0	0	0		12	19	17	16	7	13
masiRNA_u_0637	CAUCCAAUGUGAUAGGGACUUAAA	Chr9	20862683	20862706	+		repeat		1	1	1	3	2	11		0	0	0	0	0	0		8	7	2	6	6	2
masiRNA_u_0638	CGAUCAAACGUUGGACACGGAUAU	Chr9	21484765	21484788	+		repeat		5	11	3	4	5	6		0	0	0	0	0	0		12	8	5	4	7	4
masiRNA_u_0639	CGACCGACAAUCGUGUGAUAUGAU	Chr9	22452553	22452576	+		gene		18	39	15	23	15	20		0	0	1	0	0	1		19	27	19	19	9	11
masiRNA_u_0640	CUUUCGAGUCUAGGACGUGUCAGU	Chr9	3127283	3127306	+		repeat		8	9	6	8	0	9		0	0	0	0	0	0		5	4	1	3	5	1
masiRNA_u_0641	CUAUCUUUGGUUGGUCGGCCAAAU	Chr9	10388872	10388895	+		repeat		7	4	18	5	3	6		0	0	0	0	0	0		9	3	2	5	3	7
masiRNA_u_0642	UGAACGGAACAGGAACUACAAGCA	Chr9	10835769	10835792	+		repeat		9	14	4	7	2	6		1	3	0	2	0	3		11	13	8	6	7	6
masiRNA_u_0643	CAGGACUAAAUUGUAGGUGAUGAC	Chr9	12524672	12524695	+		intergenic		6	14	4	11	0	6		1	0	0	0	0	0		12	13	7	1	5	6
masiRNA_u_0644	CUCCGAGCUGUUGAUAGAAACGUC	Chr9	17677305	17677328	+		intergenic		11	11	9	3	8	1		0	1	0	0	0	0		11	3	5	3	0	1
masiRNA_u_0645	CAUUCGAUCUUUGAACAUGUACAU	Chr9	18766100	18766123	+		repeat		1	5	5	6	6	3		0	0	0	0	0	0		3	6	2	1	1	3
masiRNA_u_0646	CCUCCAUCUGUACAUGUAACCGAC	Chr9	2362282	2362305	+		gene		9	4	1	0	3	2		0	1	0	0	0	1		4	3	1	3	1	1
masiRNA_u_0647	CAAGAGACUAACAACACGAGCGAG	Chr9	4370546	4370569	+		repeat		3	7	1	1	0	4		0	0	0	0	0	0		26	8	1	6	6	3
masiRNA_u_0648	CAAGCUGUAUUCGUGUCCUAAAAU	Chr9	6107097	6107120	+		intergenic		2	11	0	2	0	3		0	0	0	0	0	0		11	7	6	1	3	1
masiRNA_u_0649	CAAGUGGAAAUUGUAUACGAGGAU	Chr9	7162984	7163007	+		intergenic		5	18	1	7	0	3		0	1	0	0	0	0		7	13	4	5	4	1
masiRNA_u_0650	CAACGGUUUGAGGAGAUGAUCAAG	Chr9	7163332	7163355	+		intergenic		5	14	2	1	1	1		0	0	0	0	0	0		9	3	1	1	1	2
masiRNA_u_0651	CUAGUGACUAGAUACCUGUAACGG	Chr9	9088584	9088607	+		repeat		3	8	2	4	0	3		0	0	0	0	0	0		7	2	5	4	1	3
masiRNA_u_0652	CAAAUAAACGAAUUGUAGCGGCAU	Chr9	9810540	9810563	+		repeat		6	11	0	3	2	5		0	0	0	0	0	0		5	8	5	2	1	0
masiRNA_u_0653	CUAGACACAAACUUCCGAAACCCA	Chr9	10093703	10093726	+		intergenic		4	8	2	0	1	0		0	0	0	0	0	0		5	2	2	2	1	1
masiRNA_u_0654	CAAAAUCUCAUUGGUCGGACUCUC	Chr9	12524321	12524344	+		intergenic		10	10	3	1	0	4		0	0	0	0	0	0		10	6	4	5	2	3
masiRNA_u_0655	CAUAGACAUGACGUCACGGACGGU	Chr9	13007992	13008015	+		intergenic		4	7	2	5	2	1		0	0	0	0	0	0		5	5	0	4	0	1
masiRNA_u_0656	CUAAAGAUUAUUUGUAGUUCCGAU	Chr9	13738129	13738152	+		repeat		3	9	1	4	3	5		0	0	0	0	0	0		6	6	7	8	0	5
masiRNA_u_0657	CAAGACGUUACGUGUGUAUGAGAU	Chr9	14912838	14912861	+		repeat		1	13	1	3	5	1		0	0	0	0	0	0		3	4	2	1	2	2
masiRNA_u_0658	CUAACUAUAGAUCCUGGCUUCGCC	Chr9	17429635	17429658	+		repeat		6	8	6	0	3	1		0	0	0	0	0	0		4	4	1	2	3	3
masiRNA_u_0659	CAUCAACGCCACGUAGGAUCCCAA	Chr9	18306102	18306125	+		repeat		2	8	3	3	1	3		0	0	0	0	0	0		6	3	6	4	2	0
masiRNA_u_0660	CUACCACUAUGACUUGAACCCGAG	Chr9	18909094	18909117	+		repeat		4	12	1	1	0	3		0	0	0	0	0	0		4	1	0	3	3	0
masiRNA_u_0661	CCACCAGACUGUUGUCAAAUCAAG	Chr9	20101201	20101224	+		intergenic		7	10	4	0	1	1		0	0	0	0	0	0		5	3	3	1	2	5
masiRNA_u_0662	CUAACUUAAAACGAUCGGACUUGU	Chr9	20310441	20310464	+		repeat		2	8	4	3	0	3		0	0	1	0	0	0		2	4	2	2	2	3
masiRNA_u_0663	CGAUCUCUAGUCCGUCUGUCCGAG	Chr9	21462888	21462911	+		intergenic		6	5	0	1	0	0		0	0	0	0	0	0		0	0	0	0	0	0
masiRNA_u_0664	CUAGGAAACUGCGAGACGAUUUAU	Chr10	707996	708019	+		repeat		0	0	3	1	5	5		0	0	0	0	0	0		0	0	3	0	4	0
masiRNA_u_0665	CAACGAGACGUCUGUAGUAACUUC	Chr10	863711	863734	+		repeat		5	5	5	4	4	7		0	0	0	0	0	0		2	1	2	0	3	2
masiRNA_u_0666	CAACGAAAAUAAAGUCAGGACCAA	Chr10	2741921	2741944	+		repeat		41	82	47	49	46	67		0	0	2	0	1	0		108	69	73	49	30	57
masiRNA_u_0667	CAUUUCACUGUAAAAUGGACUAAU	Chr10	3879960	3879983	+		gene		3	14	2	13	1	11		0	1	0	0	0	0		18	9	8	13	3	8
masiRNA_u_0668	CAUUCGAAGAUCGUGUAUUUACUC	Chr10	4259664	4259687	+		repeat		5	14	11	4	9	16		0	1	0	0	0	0		18	14	14	6	9	3
masiRNA_u_0669	CGAUCUUUGUUAGGCUCCCUCUAU	Chr10	5929958	5929981	+		repeat		5	2	2	1	4	9		0	0	0	0	0	0		3	0	0	0	5	1
masiRNA_u_0670	CAAGUACGUGGCUAUGGGAUCAAU	Chr10	5931160	5931183	+		repeat		27	23	20	19	55	33		0	0	0	0	0	0		8	11	18	8	25	15
masiRNA_u_0671	CUUUUUCUUACACUGUUUGACCAC	Chr10	9277505	9277528	+		repeat		23	37	29	19	26	32		0	0	0	0	0	0		24	14	20	12	15	20
masiRNA_u_0672	CUAAGAUUUGUGCACUGUGAAAGU	Chr10	11791605	11791628	+		intergenic		9	25	9	14	10	12		0	0	0	0	0	0		13	5	7	8	6	5
masiRNA_u_0673	CUAGCCACGGUUAUAAACUACUUC	Chr10	11872794	11872817	+		24-PHAS		0	0	1	6	6	4		0	0	0	0	0	0		0	0	0	0	0	0
masiRNA_u_0674	CAAUGUAGGAAUGUAGGAAUUAAG	Chr10	11873097	11873120	+		24-PHAS		0	0	1	1	6	13		0	0	0	0	0	0		0	0	0	0	0	0
masiRNA_u_0675	CUUGAUCUGAUUGUGAGACCCACC	Chr10	12974131	12974154	+		gene		0	0	1	0	9	2		0	0	0	0	1	0		0	0	0	0	1	3
masiRNA_u_0676	CUACGAAUCUGGGACUAAAAACGG	Chr10	15395610	15395633	+		repeat		6	4	3	1	5	5		0	0	0	0	0	0		3	4	1	1	0	0
masiRNA_u_0677	CUAAGACUGUGAAUCUGAACCGAU	Chr10	17817436	17817459	+		repeat		9	12	6	8	9	10		0	0	0	0	0	0		11	16	9	7	2	2
masiRNA_u_0678	CAAGUCUAUAGUCCUGAAAAACAU	Chr10	18122456	18122479	+		intergenic		22	33	36	27	22	30		0	0	0	0	0	1		21	30	18	19	4	18
masiRNA_u_0679	CUGAAGAAUUUAGAACGAUGUGAC	Chr10	19135240	19135263	+		repeat		4	16	3	9	5	9		0	0	1	0	0	0		6	5	7	2	0	3
masiRNA_u_0680	CUAAUACUAUCUGUUCGGAUUCGU	Chr10	19273150	19273173	+		repeat		4	23	5	10	4	13		0	0	0	0	0	0		14	13	22	5	3	9
masiRNA_u_0681	CUAAAAUGACGAAUCUGGACAAAG	Chr10	19421673	19421696	+		repeat		12	15	15	13	19	15		0	0	0	0	0	0		14	6	9	9	11	6
masiRNA_u_0682	CAAUGACGUGUAGAUUCGAAUGAC	Chr10	19574783	19574806	+		intergenic		19	6	9	16	13	22		0	0	0	0	0	0		20	26	18	13	6	10
masiRNA_u_0683	CUACGAAAAACUGUGACAAUAAAC	Chr10	20680515	20680538	+		intergenic		1	9	8	5	9	10		0	0	0	0	0	0		9	5	6	1	3	10
masiRNA_u_0684	CAAACCAAGGAGCUAGAGCGACAG	Chr10	20778504	20778527	+		intergenic		7	9	3	6	11	13		0	0	0	0	0	0		9	5	7	2	7	7
masiRNA_u_0685	CAAGGUAUCAUUAGGACAAGAGAG	Chr10	21188646	21188669	+		repeat		6	8	6	6	5	6		0	1	0	0	0	0		15	11	8	2	5	4
masiRNA_u_0686	CAUAGUACUAUGAAUUUGGACGGU	Chr10	21439696	21439719	+		repeat		6	4	3	0	5	8		0	0	0	0	0	0		2	5	2	2	2	1
masiRNA_u_0687	CGAUAGAAUAACGAAUCUGAACAG	Chr10	21465429	21465452	+		gene		1	4	5	2	3	7		0	0	0	0	1	0		5	4	3	3	2	2
masiRNA_u_0688	CUAUUUUAAUAGGACGGAACCAGA	Chr10	21669955	21669978	+		intergenic		1	4	1	2	5	12		0	0	0	0	0	0		0	1	0	0	0	0
masiRNA_u_0689	CAGAACCACUAAGACUGAAGAGAG	Chr10	21795775	21795798	+		repeat		7	12	3	5	1	9		0	0	0	0	0	0		8	8	9	4	2	2
masiRNA_u_0690	CUAGGUUUGUAUCGUCAAAGGAAU	Chr10	21821504	21821527	+		intergenic		11	22	10	15	5	16		0	0	0	0	0	0		17	21	7	17	8	6
masiRNA_u_0691	CUUCUGUGCUCUAAUUGAUUCAAU	Chr10	22800317	22800340	+		intergenic		344	643	152	131	64	128		6	10	1	0	1	4		300	378	220	175	37	96
masiRNA_u_0692	CAACGAUAAAGUUGGACUCACAGU	Chr10	23186168	23186191	+		intergenic		4	10	7	20	7	11		0	0	0	0	0	0		24	13	16	17	7	13
masiRNA_u_0693	CGUCCUGACAAUAAAUGAACCGGU	Chr10	1030758	1030781	+		repeat		0	6	5	5	2	1		0	0	0	0	0	0		8	6	4	8	0	2
masiRNA_u_0694	CUCGUGGACACUGUAAAAAAUGAU	Chr10	4259685	4259708	+		repeat		3	9	6	5	3	3		0	0	0	0	0	0		11	7	3	6	3	5
masiRNA_u_0695	CAACCAUAAAACCUGAUACAACGU	Chr10	4992458	4992481	+		repeat		2	12	4	7	2	2		0	0	0	0	0	0		5	2	5	4	4	3
masiRNA_u_0696	CUAGAUUUUCUUCUUACGCUGCAC	Chr10	5565170	5565193	+		intergenic		7	17	3	9	1	6		0	1	0	0	0	0		18	7	6	7	2	2
masiRNA_u_0697	CUACGAAUCCAGGACUAAAGAUAU	Chr10	13802678	13802701	+		repeat		4	13	1	11	4	3		0	0	0	0	0	1		4	6	5	2	4	3
masiRNA_u_0698	CUAGAACGACUUACAUUAUAAAAC	Chr10	22329895	22329918	+		repeat		3	2	2	8	2	4		0	0	0	0	0	0		5	6	3	4	1	5
masiRNA_u_0699	CAUACGAACAAGUAGACCAAGGAU	Chr10	22800493	22800516	+		intergenic		3	17	5	7	1	6		0	0	2	0	0	0		10	22	12	10	3	5
masiRNA_u_0700	CAACUCGAGGAUGGAAGUUUUGGU	Chr10	3879205	3879228	+		gene		4	8	4	1	1	1		0	0	0	0	0	0		6	5	0	3	1	4
masiRNA_u_0701	CCAUCUAAAAAUGAGGACUCAGAG	Chr10	3886881	3886904	+		intergenic		1	9	0	5	3	5		0	1	0	0	0	0		9	3	1	3	2	0
masiRNA_u_0702	CCAUCAACCGUAGGCCACCCAGAU	Chr10	3960216	3960239	+		repeat		5	5	0	0	1	1		0	0	0	0	0	0		0	2	0	1	0	2
masiRNA_u_0703	CAUCGGAUCGGUAAUUGCAAUGUC	Chr10	5564799	5564822	+		intergenic		23	14	2	3	3	3		3	0	0	0	0	0		21	10	6	1	1	0
masiRNA_u_0704	CAAAAUUGUAACAUCGGAUCGGCU	Chr10	13910274	13910297	+		intergenic		11	32	3	4	3	2		0	0	1	0	0	0		30	14	8	6	3	4
masiRNA_u_0705	CUAUGACAUGUGGGCCUAGUGGCA	Chr10	15189907	15189930	+		repeat		4	8	1	2	1	4		0	0	0	0	0	0		12	12	6	4	4	5
masiRNA_u_0706	CCAGACAAAUAACCCUGACCCGAG	Chr10	16616300	16616323	+		repeat		8	12	3	4	4	3		0	0	0	0	0	0		10	9	3	2	1	0
masiRNA_u_0707	CUGACUAUGACCUAUAUGAAUAAU	Chr10	17381953	17381976	+		intergenic		5	6	3	1	2	3		0	1	0	0	0	0		5	1	3	8	1	0
masiRNA_u_0708	CUUUUGAAAAUGUAGAUCCGUGUU	Chr10	17382877	17382900	+		repeat		1	9	1	7	0	2		0	2	0	0	0	2		6	4	6	0	2	2
masiRNA_u_0709	CUAUGCAUCGUUGGAAAUUCUACC	Chr10	17398735	17398758	+		intergenic		4	6	3	3	2	4		0	1	0	0	1	0		6	7	1	2	3	2
masiRNA_u_0710	CUAUUCACGAAAUUGGAACCAUGC	Chr10	18576540	18576563	+		repeat		7	3	4	2	3	2		0	0	1	0	0	0		5	3	3	5	3	4
masiRNA_u_0711	CUAUCCUCUUAUUACUCCACACGU	Chr10	19107958	19107981	+		intergenic		5	6	2	2	1	1		0	0	0	0	0	0		2	2	1	1	0	0
masiRNA_u_0712	CUAUAUUUUGAUGUAUGACGCUGU	Chr10	19244616	19244639	+		repeat		4	7	3	1	4	1		0	0	0	0	0	0		5	5	6	2	0	1
masiRNA_u_0713	CUAUAGUAGAAUAAGAGACCCUUG	Chr10	20273721	20273744	+		intergenic		2	10	3	2	3	4		0	0	0	0	0	0		6	3	5	3	2	2
masiRNA_u_0714	CUUCCACUUUUGAUCCUCUGCAGU	Chr10	20995670	20995693	+		intergenic		12	1	1	1	0	0		0	0	0	0	0	0		2	3	1	0	0	0
masiRNA_u_0715	CAGAUUUAUAGCCGGCUGCAACAC	Chr10	22532976	22532999	+		repeat		4	6	0	0	1	7		0	2	0	0	0	0		6	3	2	2	1	1
masiRNA_u_0716	CCUUUUACUUAAGAAUAUCUUGAU	Chr10	22800621	22800644	+		intergenic		0	12	0	2	1	4		0	0	0	0	0	0		5	4	9	10	0	7
masiRNA_u_0717	CAACCGACGGUAGUGACAUGAGAG	Chr11	796386	796409	+		repeat		18	23	5	9	13	8		0	0	1	0	0	0		17	7	8	4	11	5
masiRNA_u_0718	CUUCGAAUCUAAAGCUCUCCAAAU	Chr11	2399691	2399714	+		repeat		8	13	4	5	3	7		0	0	0	0	0	0		7	9	6	2	2	3
masiRNA_u_0719	CUAGAUUUGUUUAUUUUGGGACGG	Chr11	2523291	2523314	+		repeat		1894	1770	1568	903	1470	1180		42	51	20	89	13	114		1089	1246	645	778	409	797
masiRNA_u_0720	CAAAUCAAACUCGGGCUGGAUGAG	Chr11	2525500	2525523	+		repeat		12	22	6	9	9	17		1	0	0	0	0	0		16	14	10	6	7	10
masiRNA_u_0721	CCAAAACGUGCAGAACUUUAUCUC	Chr11	2525699	2525722	+		repeat		26	92	37	46	28	31		0	0	0	0	0	0		101	70	70	44	11	37
masiRNA_u_0722	CAUCGGUUUCAUAUUGCAAAGUAG	Chr11	3230309	3230332	+		intergenic		0	1	4	6	8	15		0	0	0	0	0	0		2	3	5	2	5	3
masiRNA_u_0723	CAAACCGAUCUCGCACGCAAGGGA	Chr11	3230523	3230546	+		intergenic		3	3	3	3	5	10		0	0	0	0	0	0		3	3	3	3	4	4
masiRNA_u_0724	CAGCCCUUGGUAGUGAAGCCUGAG	Chr11	3231574	3231597	+		intergenic		1	0	4	5	6	15		0	0	0	0	0	0		1	1	2	2	3	2
masiRNA_u_0725	CGACUCCUCGAACUAUUGAAAAAU	Chr11	3424190	3424213	+		repeat		19	31	22	13	27	22		0	0	1	0	0	0		37	21	15	7	21	12
masiRNA_u_0726	CAGGGAAAAGACGAGCUCCAACAG	Chr11	3638718	3638741	+		repeat		9	10	3	4	5	6		0	0	0	0	0	0		11	4	2	0	4	1
masiRNA_u_0727	CUUCCGAUAUCCUGUUAAACGUUC	Chr11	5138649	5138672	+		repeat		14	7	6	3	13	4		0	2	0	0	0	0		5	5	6	0	0	2
masiRNA_u_0728	CGAGGCCUGGGAGAUCUGCUUAAC	Chr11	5365709	5365732	+		repeat		1	4	2	0	6	4		0	1	0	0	0	0		3	2	0	1	1	2
masiRNA_u_0729	CUUUUUCUUGUAUUGUUUGACCAU	Chr11	7331654	7331677	+		repeat		2	2	5	6	1	9		0	0	0	0	0	0		0	2	0	1	2	1
masiRNA_u_0730	CCAGGUCCUCCAUAGUAAAACAUG	Chr11	7732678	7732701	+		intergenic		0	5	1	1	6	13		0	0	0	0	0	0		1	1	0	1	0	2
masiRNA_u_0731	CCGCCACCUGUAAUUACAUUUGAU	Chr11	7733451	7733474	+		intergenic		5	6	8	9	9	13		0	0	0	0	0	0		4	5	12	4	3	11
masiRNA_u_0732	CUAACUGGGAUCCUCUUUGGCAAG	Chr11	7733486	7733509	+		intergenic		17	8	13	9	32	38		0	0	1	2	0	1		5	6	11	6	13	16
masiRNA_u_0733	CGAUUGUGUUCAAUUAUUAAUGAU	Chr11	7733678	7733701	+		intergenic		0	2	0	7	1	12		0	0	0	0	0	0		0	3	6	5	4	3
masiRNA_u_0734	CUUUCUUUUCAGGAUGAGGACUAA	Chr11	7740150	7740173	+		repeat		3	4	10	9	19	19		0	0	0	0	1	0		4	0	5	4	12	14
masiRNA_u_0735	CUUCUCACCGUCGAUAUAUAUAUC	Chr11	7740555	7740578	+		intergenic		11	12	25	10	23	26		0	0	0	0	0	0		5	9	13	5	13	11
masiRNA_u_0736	CUUCAUCAACUUGAUCUUUGCAAA	Chr11	7740823	7740846	+		intergenic		0	0	0	1	6	10		0	0	0	0	0	0		1	0	1	1	6	1
masiRNA_u_0737	CUCCCGGGUGACGAACAGCUAGAA	Chr11	9289755	9289778	+		intergenic		0	2	1	4	8	4		0	0	1	0	0	0		2	0	0	1	7	5
masiRNA_u_0738	CAACGUGACGUAGACAUGGCAAUC	Chr11	9693758	9693781	+		repeat		7	13	6	8	6	15		0	0	0	0	0	1		14	15	19	12	6	9
masiRNA_u_0739	CAAAGUUGUGUUCUGGAGACCAUG	Chr11	11097491	11097514	+		repeat		7	5	13	9	8	7		0	0	0	0	0	0		9	13	4	4	2	9
masiRNA_u_0740	CAUUCUCGAUCCGUCACAGGUGAC	Chr11	13523594	13523617	+		repeat		6	8	5	7	8	5		0	0	0	0	0	0		9	10	2	7	2	4
masiRNA_u_0741	CUUCUCGUAUGGGUAUAGACCUAG	Chr11	13595443	13595466	+		repeat		1	6	7	3	5	7		0	0	0	0	0	0		4	3	2	4	0	1
masiRNA_u_0742	CUUUGUAAUUGUUUAGGACUUGAU	Chr11	14115834	14115857	+		intergenic		15	102	12	28	0	11		0	0	0	0	0	0		33	31	40	39	4	19
masiRNA_u_0743	CUAAAACUGUUUGGCUGAGCUCCA	Chr11	16249670	16249693	+		repeat		9	32	11	15	8	35		0	0	0	0	1	0		33	30	24	13	15	14
masiRNA_u_0744	CAAGGACAAGUUUAGAUCGGCUAC	Chr11	16333087	16333110	+		intergenic		6	2	13	5	11	25		0	0	1	0	0	0		7	3	15	1	18	15
masiRNA_u_0745	CAAGUUUAGAUCGGCUACGACCAC	Chr11	16333093	16333116	+		intergenic		0	0	1	3	3	8		0	0	0	0	0	0		2	1	6	2	3	5
masiRNA_u_0746	CCAACAACAUCGGAGCCUCUUGAG	Chr11	16333172	16333195	+		intergenic		2	3	4	4	5	8		0	0	0	0	1	0		0	0	2	3	11	9
masiRNA_u_0747	CUAGGUACUGUGGAUUUCAUCUUC	Chr11	16333254	16333277	+		intergenic		0	2	2	4	8	4		0	0	0	0	0	0		2	1	6	2	6	4
masiRNA_u_0748	CUAGGACGUCUAUGCUUCGGCAGC	Chr11	16335239	16335262	+		intergenic		3	2	2	2	6	11		0	0	0	0	2	0		2	0	8	1	4	6
masiRNA_u_0749	CAGGAAUAGGAAAAACGUAGGAAU	Chr11	16732755	16732778	+		repeat		11	32	12	9	3	8		0	0	0	0	0	0		23	7	11	8	9	12
masiRNA_u_0750	CAUGACGCUGUUGGCUUUUAGCAC	Chr11	17507197	17507220	+		repeat		24	29	24	19	28	33		1	2	0	0	0	0		29	25	22	9	13	4
masiRNA_u_0751	CUUCGUCAGCUAUUUACAAUUAAU	Chr11	17787534	17787557	+		repeat		6	8	6	8	5	6		0	0	0	0	0	0		4	10	13	3	3	4
masiRNA_u_0752	CUUAUAUGUGCAGACCGACUCAAA	Chr11	19100588	19100611	+		intergenic		29	34	5	18	12	18		0	0	0	0	0	0		30	39	14	14	11	7
masiRNA_u_0753	CAGACCGACUCAAAUAUGAAAGAU	Chr11	19100598	19100621	+		intergenic		18	35	15	18	6	12		2	4	0	0	0	0		16	22	27	7	7	10
masiRNA_u_0754	CUAUACUUCCUUGAACAAACAAUA	Chr11	23116781	23116804	+		24-PHAS		0	0	6	13	15	66		0	0	0	0	1	0		0	0	0	0	0	0
masiRNA_u_0755	CUUAGUACUACGAAUCUGGACAGG	Chr11	24896113	24896136	+		repeat		5	2	3	1	5	6		0	0	0	1	0	1		3	5	0	2	0	1
masiRNA_u_0756	CAACGUUCUGAUGUCAUCUUCGAU	Chr11	25573928	25573951	+		24-PHAS		0	0	3	4	3	17		0	0	1	0	0	0		1	0	0	0	0	0
masiRNA_u_0757	CAAAAUACAUGAUCGGAUGGACGG	Chr11	25576220	25576243	+		24-PHAS		0	0	3	2	3	7		0	0	0	0	0	2		0	0	0	0	0	0
masiRNA_u_0758	CUAUUAGACAUCUGGUUACAAAAU	Chr11	26391933	26391956	+		intergenic		3	4	6	9	7	6		0	0	0	0	0	0		4	4	2	4	1	12
masiRNA_u_0759	CUUGGAUGUUGUGUAGAAACCAUG	Chr11	28722841	28722864	+		repeat		8	34	25	16	12	49		1	2	2	4	0	2		28	44	30	25	8	30
masiRNA_u_0760	CAAGACGUUGAACUAUGCUGUCAU	Chr11	143131	143154	+		intergenic		4	18	3	7	3	4		0	0	0	0	0	0		2	10	3	5	3	3
masiRNA_u_0761	CAAUUUGAUGUGAUGGAAAAAGAC	Chr11	1705662	1705685	+		repeat		1	5	3	8	3	2		0	0	0	0	0	0		3	3	5	1	2	1
masiRNA_u_0762	UAAAUCCAAAACGUGCAGAACUUU	Chr11	2525694	2525717	+		repeat		2	18	3	9	3	4		0	1	0	1	0	0		6	14	8	4	2	8
masiRNA_u_0763	CAAAACGUGCAGAACUUUAUCUCU	Chr11	2525700	2525723	+		repeat		5	11	13	8	2	6		1	0	0	0	1	0		15	23	7	7	1	2
masiRNA_u_0764	CUAUUUGACGUGUAAUUCUUUUGC	Chr11	10049583	10049606	+		intergenic		8	9	5	5	0	5		0	1	0	0	0	0		3	6	0	2	1	4
masiRNA_u_0765	CAGCGAUGUAACCUCACCUUAGAU	Chr11	22033339	22033362	+		repeat		2	7	5	6	5	3		0	0	0	0	0	0		4	4	3	2	1	0
masiRNA_u_0766	UUAGUUUAAUUGAGAGUGGUAGUA	Chr11	23106636	23106659	+		24-PHAS		0	0	8	17	1	3		0	0	0	0	1	0		0	0	0	0	0	0
masiRNA_u_0767	CAAACCAUUCCCGUCUCGUAACAG	Chr11	23639492	23639515	+		repeat		4	7	6	4	3	2		0	0	0	0	0	0		6	4	1	3	2	0
masiRNA_u_0768	CGAUGCACGUUAGACAGGAAAAAU	Chr11	24925740	24925763	+		intergenic		0	3	7	3	1	2		0	0	0	0	0	0		2	0	1	1	2	1
masiRNA_u_0769	CAACUCUCCAUCUAUUUUAGCAAG	Chr11	28306834	28306857	+		repeat		11	2	9	1	5	4		0	1	0	0	0	1		6	5	4	3	2	2
masiRNA_u_0770	CUAUUGUCGGCUGUAUAGAAAAAU	Chr11	2509125	2509148	+		intergenic		1	12	0	1	0	1		0	0	0	0	0	0		3	1	4	1	2	0
masiRNA_u_0771	CAUCGGUAACAUGUGGGUCAGGAU	Chr11	3236929	3236952	+		repeat		4	11	2	4	2	4		0	1	0	0	0	0		5	6	5	1	1	1
masiRNA_u_0772	CUUCCUUCUGCAGACCCUCUACUC	Chr11	3851206	3851229	+		intergenic		6	5	2	2	7	2		0	0	0	0	0	0		3	3	3	3	2	2
masiRNA_u_0773	CAGAACAAUGGUUACUGAUAUGGU	Chr11	5198240	5198263	+		repeat		0	14	0	8	0	5		1	0	0	0	0	0		4	10	8	1	2	1
masiRNA_u_0774	CGUAGGAAUGUUGUAGGAACGUGU	Chr11	6022352	6022375	+		repeat		9	3	3	2	2	0		0	0	0	0	0	0		1	2	0	0	0	0
masiRNA_u_0775	CUAGCCAAUGCAAUCUGAUCGAAU	Chr11	7334027	7334050	+		repeat		2	10	6	2	1	5		0	0	0	0	0	0		3	5	4	3	1	0
masiRNA_u_0776	CUAUAACUUCCAGAUCUCUCUUCC	Chr11	7733546	7733569	+		intergenic		8	3	2	2	6	3		0	0	0	0	0	0		0	1	5	1	3	5
masiRNA_u_0777	CUAGGAAUUAUUGGGACGUGAUAG	Chr11	10063866	10063889	+		intergenic		7	6	2	3	2	6		0	0	0	0	0	0		7	6	3	2	4	0
masiRNA_u_0778	CAUCCACUUUUAGGUCUCGUGCAC	Chr11	11573842	11573865	+		repeat		6	5	3	4	2	3		0	0	0	0	0	0		10	7	1	3	1	0
masiRNA_u_0779	CGACCGACAAUGAUCUCUAUUCAG	Chr11	16102998	16103021	+		repeat		8	2	1	1	2	1		0	0	0	0	0	0		2	2	3	0	0	0
masiRNA_u_0780	CCACCGUCGCGACUUACCAGAGAC	Chr11	16717372	16717395	+		repeat		8	2	2	3	0	1		0	0	0	0	0	0		5	3	1	2	3	1
masiRNA_u_0781	CGAGAACUUCGUGCCUGCUGUGGU	Chr11	16719102	16719125	+		repeat		3	11	2	0	1	1		0	0	0	0	0	0		5	4	3	0	1	0
masiRNA_u_0782	CUAUUUACGAUAUCGACUGGGUGC	Chr11	17614648	17614671	+		repeat		2	10	5	4	4	5		1	0	0	0	0	1		4	8	4	3	2	0
masiRNA_u_0783	CUAACUAUUGUAUGAGUGGACUAU	Chr11	18965384	18965407	+		repeat		3	9	3	4	2	2		0	0	0	0	0	0		5	2	4	5	0	6
masiRNA_u_0784	CUAAAGAACUUAUAUGUGCAGACC	Chr11	19100580	19100603	+		intergenic		5	17	2	2	2	4		0	0	0	0	0	0		20	11	3	5	2	4
masiRNA_u_0785	CAUGAUUAUUUUGUUGGACAAAAC	Chr11	20438846	20438869	+		intergenic		4	12	0	6	0	4		0	0	0	0	0	0		8	6	4	7	4	1
masiRNA_u_0786	CUAACACGUGAAGCAGAGCUAAAG	Chr11	21662197	21662220	+		intergenic		4	6	1	1	1	2		0	0	0	0	0	0		5	2	2	3	1	2
masiRNA_u_0787	CAGCCACUGUCUAGCUGAACCGAG	Chr11	21855613	21855636	+		repeat		6	5	3	5	2	3		0	0	0	0	0	0		0	3	0	1	1	1
masiRNA_u_0788	CAAACCUUCCGACUGUAUCUAAAG	Chr11	23953903	23953926	+		intergenic		9	2	0	3	4	4		0	0	0	0	0	0		5	3	2	3	1	1
masiRNA_u_0789	CAAGUGUGUAGAAAACGGAGAGAU	Chr11	25789548	25789571	+		intergenic		4	7	1	1	1	2		0	0	0	0	0	0		3	4	2	1	1	2
masiRNA_u_0790	CUAUCCAGAUUCGUUGUGCUCAAG	Chr11	25849182	25849205	+		intergenic		3	8	6	1	3	4		0	0	0	0	0	0		10	6	1	5	1	2
masiRNA_u_0791	CUAAUCCUAUCUCUCUCUGAUCAG	Chr11	28128451	28128474	+		intergenic		5	6	2	2	0	1		0	0	0	0	0	0		2	3	2	1	0	0
masiRNA_u_0792	CUUACAAUCUAUGACGUGUGGCCC	Chr11	28931688	28931711	+		repeat		9	4	4	0	3	3		0	0	0	0	0	0		0	4	2	2	0	0
masiRNA_u_0793	CAAAAGAUAGUAGGGGUUAGACGU	Chr12	2640674	2640697	+		repeat		32	12	6	6	5	5		0	0	0	0	0	0		3	4	4	2	2	3
masiRNA_u_0794	CUAUACUACGAAUCUGGACAUGAG	Chr12	3572720	3572743	+		repeat		13	23	15	11	3	10		0	0	0	0	0	0		21	23	13	11	10	7
masiRNA_u_0795	CUAAGAAUAGAAGUAGGGAUGAGC	Chr12	4730834	4730857	+		intergenic		2	1	0	2	6	4		0	0	0	0	0	0		1	1	1	0	2	4
masiRNA_u_0796	CUUAUACGUGUAGAAGAGAUCAUC	Chr12	4731626	4731649	+		intergenic		1	1	3	4	5	16		0	0	0	0	0	0		2	2	5	4	8	6
masiRNA_u_0797	CGGUCUCACGCAUCUAACAGUAAU	Chr12	4733645	4733668	+		gene		4	1	9	4	3	7		0	0	0	0	0	0		1	0	1	0	1	5
masiRNA_u_0798	CAUCGGUAACACAACUCUUGCAUG	Chr12	4735161	4735184	+		gene		0	3	4	1	5	5		0	0	0	0	0	0		2	3	2	4	3	2
masiRNA_u_0799	CUAACUCGGCGCUCUAUAGACAAU	Chr12	4735941	4735964	+		intergenic		0	1	2	2	3	10		0	0	0	0	0	0		1	0	1	2	2	6
masiRNA_u_0800	CAACCGGAUCUGUAGGUGAGAGAG	Chr12	4900140	4900163	+		intergenic		8	8	12	10	12	20		0	0	0	0	1	0		17	12	14	6	21	17
masiRNA_u_0801	CAAGAGAUGUGUUUCUGAGGCAGU	Chr12	4901530	4901553	+		intergenic		3	3	3	5	5	6		0	0	0	0	0	0		2	0	4	3	1	2
masiRNA_u_0802	CAAAAAUAGACCGUGGGCUCAACG	Chr12	5725783	5725806	+		repeat		12	4	4	7	12	7		0	0	0	0	0	0		3	4	1	5	3	0
masiRNA_u_0803	CAAACUUCCAAUUUUGACGUGGAA	Chr12	6978220	6978243	+		repeat		2	11	2	3	4	13		0	0	0	0	0	0		2	9	5	10	1	3
masiRNA_u_0804	CUAAGGACAGAUCAGAAUAAGAGC	Chr12	7521877	7521900	+		gene		6	10	5	4	6	5		0	0	2	0	0	0		5	6	9	7	3	5
masiRNA_u_0805	CAAAUCUGAACAUACUCUACGUCC	Chr12	7558090	7558113	+		intergenic		3	8	5	3	7	3		0	0	0	0	0	0		5	3	4	2	1	1
masiRNA_u_0806	CACCCGGAUAUAUAGAAUAACUAU	Chr12	10985590	10985613	+		gene		19	26	9	19	17	7		0	0	0	1	0	0		21	15	12	7	9	8
masiRNA_u_0807	CGACCUAAGUCAACGAACACAAAG	Chr12	11173235	11173258	+		repeat		2	4	1	2	4	7		0	0	0	0	0	0		5	7	3	7	5	3
masiRNA_u_0808	CAUUUUCUAGCUGUCCAGAUUCGU	Chr12	17683836	17683859	+		repeat		20	33	13	21	9	13		0	1	0	0	0	0		16	16	15	15	10	17
masiRNA_u_0809	CAUCCCUUUUAAGUGUAGCUUGAU	Chr12	17986591	17986614	+		intergenic		0	0	2	4	3	9		0	0	0	0	0	0		0	1	1	0	4	1
masiRNA_u_0810	CUUCGAACUCAACAUAAAAAUCUG	Chr12	19174928	19174951	+		repeat		78	66	87	43	68	52		0	1	0	0	0	0		86	83	83	58	12	35
masiRNA_u_0811	CAUUUCUAUUAUGAAUCUGGACAG	Chr12	19887919	19887942	+		repeat		5	17	6	15	2	8		0	0	0	0	0	0		28	22	16	12	8	8
masiRNA_u_0812	CGACUACGAAUAGAUAAAUUUAAU	Chr12	20291887	20291910	+		repeat		1	3	2	8	3	7		0	0	0	0	0	0		6	1	3	3	0	7
masiRNA_u_0813	CGAUCCUAAAAACUGCUGUAAUUC	Chr12	21731393	21731416	+		intergenic		3	1	2	2	6	4		0	0	0	0	0	0		1	0	2	3	0	1
masiRNA_u_0814	CAAUAACUCAUCGGGCACUACAAG	Chr12	22729016	22729039	+		24-PHAS		0	0	1	4	2	9		0	0	1	0	0	0		1	0	0	0	0	0
masiRNA_u_0815	CUACGAGACGUAAUCUUCACUAUC	Chr12	22757867	22757890	+		24-PHAS		0	0	83	82	72	135		0	0	1	0	0	0		0	0	0	0	3	1
masiRNA_u_0816	CAUCCACUUUUAGAUCUCGUGUAG	Chr12	22790145	22790168	+		repeat		4	5	2	3	2	8		0	0	0	0	0	0		7	8	10	8	3	3
masiRNA_u_0817	CGACAACAAGACGUCUGUGGUGAC	Chr12	23117999	23118022	+		repeat		2	12	3	7	3	9		0	2	1	0	0	0		13	10	8	4	3	4
masiRNA_u_0818	CUGGAUAAGCUGAAACAAGAUGGU	Chr12	24729949	24729972	+		gene		6	9	3	1	7	8		0	1	0	0	0	0		3	1	4	2	3	3
masiRNA_u_0819	CUAUUAUCAGUAGGACUUAGUGCA	Chr12	24731045	24731068	+		intergenic		0	7	2	2	1	20		0	0	0	0	1	0		4	2	9	4	6	8
masiRNA_u_0820	CUACCAAAGAAGGAGAAGAACUAA	Chr12	24731261	24731284	+		intergenic		0	2	1	3	5	7		0	0	0	0	0	0		2	0	3	2	4	5
masiRNA_u_0821	CUAAGAACUGAUGAGCAGCACGAA	Chr12	24731281	24731304	+		intergenic		0	0	3	3	2	11		0	0	0	0	0	0		1	1	5	4	3	5
masiRNA_u_0822	CCUCUAUUAAUCAUUGGACAUGUG	Chr12	24731338	24731361	+		intergenic		3	0	1	1	9	4		0	0	0	0	0	0		3	3	6	3	1	6
masiRNA_u_0823	CGAUCGACUGUAAAUAUCAAUGGU	Chr12	24732523	24732546	+		repeat		8	1	13	6	19	14		0	0	1	0	0	1		2	3	7	4	9	9
masiRNA_u_0824	CUUUGAGACGUAGAUUAUAUAUAU	Chr12	24732641	24732664	+		repeat		0	3	2	3	2	15		0	0	0	0	0	0		2	1	3	2	10	9
masiRNA_u_0825	CAUAGGUAUCUAUAGCUCUCUCAU	Chr12	25414848	25414871	+		repeat		6	13	13	13	6	11		0	0	0	0	0	0		11	8	5	8	10	3
masiRNA_u_0826	CAACUGCAAGAUCUAUACUCCAUA	Chr12	25441639	25441662	+		24-PHAS		0	0	3	1	9	9		0	0	0	0	0	0		0	0	0	0	1	1
masiRNA_u_0827	CUAAUUUAGGUAUAAGAAGUAAAU	Chr12	25443741	25443764	+		24-PHAS		0	0	0	8	3	11		0	0	0	0	0	0		0	0	0	0	0	0
masiRNA_u_0828	CUACGUGGCUAAUUUGAUUCUAUC	Chr12	9875106	9875129	+		repeat		13	12	8	7	7	2		0	0	0	0	0	0		10	6	4	4	2	3
masiRNA_u_0829	CAGACUAAUAUUAAUGAGAACAAG	Chr12	10702348	10702371	+		gene		2	8	7	7	3	6		0	2	2	0	0	0		7	2	5	5	2	4
masiRNA_u_0830	CAGAUUUGUAGCCAGCUGUAGCAU	Chr12	21414653	21414676	+		repeat		10	12	6	6	1	2		0	0	0	0	0	0		8	2	0	1	0	2
masiRNA_u_0831	CAAAAACAAAAAGGAAGAACUGUU	Chr12	22749777	22749800	+		24-PHAS		0	0	4	10	1	6		0	0	0	0	0	0		0	0	0	0	0	6
masiRNA_u_0832	CUACCGCUGAAAGAAUAAAUACAC	Chr12	25109018	25109041	+		repeat		5	5	6	4	1	7		0	0	0	0	0	0		3	2	3	2	3	3
masiRNA_u_0833	CUUCCCUGUAGAAAGUAAAAUGAC	Chr12	26644663	26644686	+		intergenic		5	7	8	3	2	3		0	1	0	0	0	0		5	5	4	4	0	1
masiRNA_u_0834	CUAUCUAACUGUAACUGUAUCUGU	Chr12	463295	463318	+		intergenic		6	21	4	5	0	3		0	0	0	0	0	0		12	8	6	5	1	5
masiRNA_u_0835	CAAACCGACUAUCACUAGACCAAC	Chr12	3872972	3872995	+		intergenic		5	7	5	1	1	4		0	0	0	0	0	0		5	5	10	1	2	1
masiRNA_u_0836	CAAAGAUCCGCGCGCUGCAGGCCG	Chr12	4900279	4900302	+		intergenic		5	7	2	1	4	4		0	0	0	0	0	0		1	3	3	1	3	2
masiRNA_u_0837	CUUCCGACAUCCGAUUAAACAUCU	Chr12	4986561	4986584	+		repeat		5	5	1	3	0	3		0	0	0	0	0	0		3	3	5	1	0	2
masiRNA_u_0838	CGAGGAUCUGUCAGCCAAUAGCUC	Chr12	7522355	7522378	+		gene		7	5	0	1	0	4		0	0	0	0	0	0		4	7	3	2	0	2
masiRNA_u_0839	CAAUGGACUAUACUCGAAUACGGU	Chr12	17654221	17654244	+		repeat		9	8	3	1	3	4		0	0	0	0	0	0		4	4	2	0	0	0
masiRNA_u_0840	CAACCCGAUCUAGACCGUCCUGAU	Chr12	18211583	18211606	+		intergenic		5	5	0	1	0	4		0	0	0	0	0	0		2	1	1	0	0	2
masiRNA_u_0841	CAUUGGCUCCUUGACUUGUAUGAU	Chr12	20009517	20009540	+		intergenic		5	12	4	2	3	6		0	0	0	0	0	0		10	0	3	0	2	3
masiRNA_u_0842	CAAACUGUUCUAGAUUGGGUCGAG	Chr12	21504347	21504370	+		repeat		5	6	3	4	2	2		0	0	0	0	0	0		9	2	2	6	4	2
masiRNA_u_0843	CCGAAAGACGUGAAUUUACCCGAG	Chr12	22721682	22721705	+		repeat		9	3	1	1	3	1		0	0	0	0	0	0		2	2	2	1	1	2
masiRNA_u_0844	CUUCCGACAUCUGAUAAAAACAUU	Chr12	24720129	24720152	+		repeat		7	7	4	0	3	3		0	0	0	0	0	0		1	3	2	2	1	3
masiRNA_u_0845	CGAGGGGAUGUAAUACAAACUAGU	Chr12	25942139	25942162	+		intergenic		5	8	3	4	1	1		0	0	0	0	0	0		6	0	2	0	2	0
masiRNA_u_0846	CUUCGUCUUUUGGCUUCGCCUGAU	Chr12	27240776	27240799	+		repeat		6	9	2	2	6	2		0	1	0	0	0	0		3	4	2	2	1	1
masiRNA_u_0847	CAAGAUCGUGGACCUAUGUGAAAC	Chr1	56685	56708	-		repeat		3	4	2	1	14	8		0	0	0	0	0	0		8	8	2	5	5	3
masiRNA_u_0848	CUAGGAAACUCUAACUGCAAUGGC	Chr1	858788	858811	-		gene		3	2	4	2	8	5		0	0	1	0	0	0		0	2	1	0	1	0
masiRNA_u_0849	CAGCCAAAACUAGAGUAGACCGUG	Chr1	2023495	2023518	-		repeat		6	6	7	4	5	7		1	0	0	0	0	0		8	9	2	4	1	2
masiRNA_u_0850	CUAUCGGAGAUGUUGGACUGCAGC	Chr1	2556958	2556981	-		intergenic		6	3	3	3	2	8		0	0	0	0	0	0		3	0	4	1	4	5
masiRNA_u_0851	CAUAAAAAUUUUGAAUAAGACGAG	Chr1	3936014	3936037	-		repeat		1	5	0	0	4	7		0	0	0	0	0	0		4	2	2	1	1	4
masiRNA_u_0852	CAAUAAAUUUUGGGUGGACAUGAU	Chr1	4099932	4099955	-		gene		7	19	8	10	7	10		0	1	1	0	0	0		15	12	3	6	6	8
masiRNA_u_0853	CAUCUUACAAUGAAUCUGGACAUG	Chr1	4439379	4439402	-		intergenic		7	7	1	4	3	7		0	0	0	0	0	0		7	2	7	1	0	1
masiRNA_u_0854	CAAAUUGGAUAUGUGUGCAACAAA	Chr1	5628115	5628138	-		intergenic		8	7	4	7	3	10		0	0	0	0	0	0		8	16	9	6	3	3
masiRNA_u_0855	CAUAAAGAUCUAUAUGUGGCAAAU	Chr1	7287772	7287795	-		repeat		7	8	10	10	8	6		0	0	0	0	0	0		4	6	1	3	4	3
masiRNA_u_0856	CGACAACAAUUAAACCAGGACUAA	Chr1	8130052	8130075	-		repeat		7	12	6	9	9	5		2	0	0	0	0	0		9	12	4	2	2	2
masiRNA_u_0857	CAAGUUAUAUUUUGGGACGGAGAA	Chr1	8159224	8159247	-		repeat		1	5	1	0	4	6		0	0	0	0	0	0		5	9	3	0	0	4
masiRNA_u_0858	CUAUUUUUUGUGGAGCUGAAACAU	Chr1	9040970	9040993	-		repeat		3	13	16	17	16	36		0	0	0	0	0	0		16	7	15	10	15	22
masiRNA_u_0859	CAAAUCAACUGUCGAUGCUCUAGU	Chr1	9437475	9437498	-		intergenic		1	5	6	14	4	15		0	0	0	0	0	0		8	5	13	2	3	11
masiRNA_u_0860	CAUUCGACUCUUGAACCCAAAGGA	Chr1	9438315	9438338	-		intergenic		8	8	10	13	35	53		0	0	1	0	0	0		20	11	26	16	24	26
masiRNA_u_0861	CUGCCGUUGCUCUUGAACCCAAAG	Chr1	9438582	9438605	-		gene		13	8	13	7	29	19		0	0	1	0	0	0		4	6	6	4	10	6
masiRNA_u_0862	CUACCGUUGCUCUUGAACCAAAGG	Chr1	9438849	9438872	-		gene		1	1	2	1	6	6		0	0	0	0	0	0		2	2	2	0	0	0
masiRNA_u_0863	CUUCCGACUAUCUACCGUCUGCAC	Chr1	9911956	9911979	-		intergenic		10	16	9	3	4	12		0	0	0	0	0	0		6	12	4	6	1	3
masiRNA_u_0864	CUAACCGUCGAUUUUCAAUUAAAU	Chr1	10046752	10046775	-		repeat		21	41	48	28	26	42		0	0	0	0	0	0		33	23	27	14	10	19
masiRNA_u_0865	CAGGGGCAAACAAACUAGAUCAAG	Chr1	11362326	11362349	-		intergenic		2	4	9	4	9	7		0	0	1	0	0	0		4	2	3	1	8	7
masiRNA_u_0866	CGAUCCCGUCAUGUAAAUUGCCAC	Chr1	11471538	11471561	-		intergenic		2	6	0	5	8	5		0	0	0	0	1	0		0	1	1	1	11	6
masiRNA_u_0867	CAAAACAUUGUGAUCCUCCUGACU	Chr1	11472632	11472655	-		gene		0	5	7	5	1	11		0	0	0	0	0	0		7	5	8	6	9	9
masiRNA_u_0868	CUUAAAAAUAACUUUUGGACUGUU	Chr1	11472720	11472743	-		gene		0	1	1	3	2	8		0	0	0	0	0	0		3	2	3	5	2	4
masiRNA_u_0869	CAGAGAUAUGCGGAUGAUUAACAG	Chr1	14334893	14334916	-		intergenic		1	2	3	5	12	8		0	0	0	0	0	0		5	4	3	3	6	6
masiRNA_u_0870	CGAAAUAAUAACACGUGUAGCAAC	Chr1	14338136	14338159	-		intergenic		3	14	4	10	4	10		1	0	0	0	0	0		11	3	11	6	6	8
masiRNA_u_0871	CUUAGAAACUACCGUUGGAUUGAG	Chr1	15112394	15112417	-		repeat		3	14	3	5	3	14		0	0	0	1	0	0		13	7	10	6	6	7
masiRNA_u_0872	CUAGUACUAUGAAUCUGGACAGAG	Chr1	15492554	15492577	-		repeat		3	6	1	4	3	7		0	0	0	0	0	0		9	6	4	8	3	6
masiRNA_u_0873	CGAGAUAAAACCGGGACUACCAAU	Chr1	18077332	18077355	-		repeat		5	14	0	8	1	14		0	2	0	0	0	0		12	9	9	5	7	3
masiRNA_u_0874	CAAACUGUUGAAGCUACACAAGAC	Chr1	18555495	18555518	-		repeat		3	11	1	11	1	17		0	0	0	0	0	0		9	8	8	5	5	2
masiRNA_u_0875	CAAUUGUAUUAUAUCGGGAGACAG	Chr1	22015600	22015623	-		intergenic		18	17	10	10	6	7		0	0	0	0	0	0		29	13	13	4	4	6
masiRNA_u_0876	CGAAUCUUUGGACACAUGCAUGAA	Chr1	23749481	23749504	-		repeat		2	13	7	1	2	8		0	1	0	0	0	1		12	9	5	4	8	2
masiRNA_u_0877	CAUCGAAUCUUUGGACACAUGCAU	Chr1	23749484	23749507	-		repeat		72	175	63	93	58	74		0	0	4	0	0	0		129	87	99	67	49	71
masiRNA_u_0878	CUUCCGACAUCUGAUCAAACAUUC	Chr1	24106485	24106508	-		repeat		36	25	16	6	15	8		0	0	0	0	0	0		33	29	26	13	6	8
masiRNA_u_0879	CAAGUAAAUUUGAUGACGUGGAAA	Chr1	25973336	25973359	-		intergenic		0	1	5	7	3	7		0	0	0	0	0	0		4	5	0	0	0	1
masiRNA_u_0880	CUCUUACUUGUAUUGUACUCUAAG	Chr1	27827987	27828010	-		repeat		7	11	6	4	8	12		0	0	0	0	0	0		7	8	5	4	2	8
masiRNA_u_0881	CUAAGAGCGCUAACAAAUAUUGAU	Chr1	28201094	28201117	-		intergenic		2	7	8	15	8	17		0	0	0	0	0	0		18	3	27	7	18	13
masiRNA_u_0882	CGAGGUGACAUAGAUAUUUUUCAG	Chr1	28202959	28202982	-		intergenic		3	0	4	4	4	12		0	0	0	0	0	0		2	2	1	1	5	4
masiRNA_u_0883	CUACGCUCCGCUCAUAGAACAAAG	Chr1	28213781	28213804	-		intergenic		31	18	62	52	78	72		0	0	2	0	0	0		50	20	55	30	64	60
masiRNA_u_0884	CUACAGAAAACUCAGCCGACCUAC	Chr1	30813125	30813148	-		intergenic		26	42	11	8	7	16		0	0	0	0	0	0		29	11	12	3	12	7
masiRNA_u_0885	CAUACUACAGAAAACUCAGCCGAC	Chr1	30813129	30813152	-		intergenic		10	10	9	10	3	10		0	0	0	0	0	0		14	7	8	7	5	3
masiRNA_u_0886	CUACGAUCUGUAGCCCGCUGCUAU	Chr1	32576383	32576406	-		repeat		7	7	4	4	13	7		0	0	0	0	0	0		3	3	2	3	4	1
masiRNA_u_0887	CUAUGACGUGUAGAUCCAAUGACU	Chr1	34191460	34191483	-		repeat		9	15	19	13	9	12		0	0	0	0	0	0		13	27	10	9	2	7
masiRNA_u_0888	CAGCGUGACAUGAACACUAACAUG	Chr1	34767615	34767638	-		intergenic		3	4	1	2	6	4		0	0	0	0	0	0		0	2	1	2	1	1
masiRNA_u_0889	CAAACGAUAACGUUAGGACUUGGG	Chr1	37427860	37427883	-		intergenic		29	17	5	4	9	9		0	3	0	0	0	0		0	0	0	0	0	0
masiRNA_u_0890	CUGCUAUCUGACGUGAUCACUGAC	Chr1	37649449	37649472	-		intergenic		2	2	2	3	5	6		0	0	0	0	1	0		6	6	5	3	1	4
masiRNA_u_0891	CUUCCGAUUCUGGUAGUGUAGCAC	Chr1	38180178	38180201	-		intergenic		12	11	9	6	9	5		0	0	0	0	0	0		8	3	3	4	4	3
masiRNA_u_0892	CUUCUUACUAUGAAUCUGGAUGUG	Chr1	2239385	2239408	-		repeat		3	4	6	4	1	2		0	0	0	0	0	0		1	2	3	3	2	1
masiRNA_u_0893	CAAUAUGACGAUAGAUAAGAGAAU	Chr1	9437710	9437733	-		intergenic		0	8	4	6	0	5		0	0	0	0	0	1		3	2	5	3	5	3
masiRNA_u_0894	CAAAUACUAACUCAUUGGACUGUC	Chr1	11535061	11535084	-		intergenic		11	26	4	6	0	2		0	2	0	0	0	0		22	11	12	8	4	3
masiRNA_u_0895	CAGGGCAAUUAUGUCUAACAACGU	Chr1	14783517	14783540	-		intergenic		3	4	3	8	1	4		0	0	0	0	0	1		0	4	4	1	1	0
masiRNA_u_0896	CAAGAGUGGCUAAAUAGGAACAAU	Chr1	16113174	16113197	-		intergenic		1	6	4	7	3	6		0	0	0	0	0	0		7	6	4	6	2	2
masiRNA_u_0897	CAACUGUGUAUUCAAAUUUAUAAC	Chr1	17835878	17835901	-		repeat		0	0	7	5	1	1		0	0	0	0	0	0		0	2	7	2	1	6
masiRNA_u_0898	CAUCAUUUUGUAGAGCCAACCGGA	Chr1	22460286	22460309	-		repeat		6	5	5	5	0	2		0	0	0	0	0	0		1	3	1	2	0	0
masiRNA_u_0899	CGUGUGAAAGACUAGUGUUCCAAU	Chr1	25863305	25863328	-		intergenic		11	9	7	6	3	3		0	0	0	0	0	0		6	4	4	2	1	2
masiRNA_u_0900	CAUCGAAUGUUUGGACAUAUGCAU	Chr1	28966313	28966336	-		repeat		1	13	3	7	2	5		0	0	0	0	0	1		10	10	4	2	0	4
masiRNA_u_0901	CGAUUUAUAUGUAAACUGUGCAAU	Chr1	33257158	33257181	-		repeat		4	4	3	8	2	5		0	0	0	0	0	0		4	2	6	3	1	2
masiRNA_u_0902	CGUAGUGAGAAAGAGAUUGUCAAG	Chr1	38554363	38554386	-		repeat		5	7	7	3	1	0		0	0	0	0	0	0		7	1	2	3	0	5
masiRNA_u_0903	CAUAUUUCUAGCAACUCCGAAAAU	Chr1	39419557	39419580	-		intergenic		9	17	3	12	0	5		0	0	0	0	0	0		13	16	7	11	5	7
masiRNA_u_0904	CUUAUUACAAAUGACCGACGGCCG	Chr1	42287395	42287418	-		intergenic		8	8	3	7	0	1		2	0	0	0	0	0		2	2	1	2	1	1
masiRNA_u_0905	CGAAAAAUGUGGGACAUAAAGAUU	Chr1	42287491	42287514	-		intergenic		2	11	3	7	0	7		0	1	0	0	0	0		3	6	2	3	2	1
masiRNA_u_0906	CAAAUCUUGGUGGGAUGCGGACGU	Chr1	1143488	1143511	-		repeat		8	3	2	2	0	0		0	0	0	0	0	0		2	0	1	1	0	0
masiRNA_u_0907	CUAACAAAGUAGACGGGCCGCUGC	Chr1	2339695	2339718	-		repeat		10	4	3	1	1	2		0	0	0	0	0	0		7	6	1	3	0	2
masiRNA_u_0908	CAAACUGCGAAGUAGCACUUAAGC	Chr1	2676232	2676255	-		intergenic		8	10	1	5	1	2		0	0	1	0	0	0		6	14	3	1	2	1
masiRNA_u_0909	CUUCCUAUCGUGCUUUUGUUCAUC	Chr1	4086846	4086869	-		intergenic		6	5	1	3	1	3		0	0	0	0	0	0		6	2	2	0	1	0
masiRNA_u_0910	CUUACGUGGCUGGUUUGACUAGAU	Chr1	6618199	6618222	-		repeat		8	11	3	4	1	4		0	0	0	0	0	0		4	5	7	0	1	2
masiRNA_u_0911	CCAUCCCAAAAUAAGUAGAGCCGU	Chr1	6917574	6917597	-		intergenic		5	6	0	1	2	2		0	1	0	0	0	0		0	0	2	1	0	0
masiRNA_u_0912	CCGGCUAUUAAAUUGACUAUAGAU	Chr1	9854721	9854744	-		repeat		3	7	5	4	1	0		0	1	0	0	0	0		0	4	1	2	1	1
masiRNA_u_0913	CGGAUUUUAUCUGUGAACGUUAAG	Chr1	11359046	11359069	-		repeat		5	22	2	6	0	4		1	0	0	0	0	0		19	9	10	6	1	1
masiRNA_u_0914	CUGAAGAAAGAACUAAGAACUACU	Chr1	11534445	11534468	-		repeat		4	17	1	3	2	2		0	0	0	0	0	0		4	3	1	8	1	3
masiRNA_u_0915	CUUCCUUAUGACUUAGCAUCAAAU	Chr1	14467987	14468010	-		intergenic		1	12	5	3	0	5		1	0	0	0	0	0		6	8	7	1	0	0
masiRNA_u_0916	CGAUUCAAAGGGGCCCUGAGACAG	Chr1	18267515	18267538	-		repeat		6	7	1	2	5	3		0	0	0	0	0	0		2	2	0	2	1	2
masiRNA_u_0917	CUUCCACAAUGUAUACAACCUGAU	Chr1	18999960	18999983	-		repeat		3	9	4	1	5	3		0	0	0	0	0	0		2	5	5	4	2	1
masiRNA_u_0918	CAAGGAAAGAUUGUAAGACAUAAC	Chr1	22269728	22269751	-		repeat		2	10	2	3	2	4		0	0	0	0	0	0		8	7	6	9	0	1
masiRNA_u_0919	CUACGAUCUGAGAAUGCUCAACUG	Chr1	23151061	23151084	-		intergenic		15	12	4	3	1	0		0	0	0	0	0	0		8	11	5	2	0	0
masiRNA_u_0920	CUAGGAUUUGUCCAAGAGUCGUGU	Chr1	24388891	24388914	-		repeat		11	2	3	1	3	5		0	0	0	0	0	0		1	3	0	4	1	2
masiRNA_u_0921	CGAAAGUAGAAACACAAGGAUGAU	Chr1	24736147	24736170	-		repeat		5	5	2	3	3	2		0	1	0	0	0	0		4	3	0	1	0	0
masiRNA_u_0922	CUAAAACAACGAAUCUGGACGAUG	Chr1	26342664	26342687	-		repeat		8	4	4	1	3	3		0	0	0	0	0	0		4	3	2	3	1	1
masiRNA_u_0923	CUAAUGCUAUAAAUCUGGACAGAC	Chr1	31997957	31997980	-		repeat		6	4	1	4	2	6		0	1	0	0	0	0		6	6	5	3	3	7
masiRNA_u_0924	CAAACAUCCGAUGUGACAUGGGCU	Chr1	34624585	34624608	-		repeat		4	9	2	7	1	5		0	1	0	0	0	0		2	7	6	8	2	6
masiRNA_u_0925	CUAAAAAGUGACGUGACCUCUCCU	Chr1	35778074	35778097	-		intergenic		5	6	3	2	0	4		0	0	0	0	0	0		2	7	2	3	1	1
masiRNA_u_0926	CAUGGUAUAACGAAAUCUGGACGU	Chr1	36408611	36408634	-		intergenic		9	9	3	6	3	2		0	0	0	0	0	0		9	6	1	3	3	5
masiRNA_u_0927	CAGGACAAAGUUGACUGGACGAGU	Chr1	36754783	36754806	-		repeat		9	6	0	0	0	0		0	0	0	0	0	0		1	2	2	0	0	1
masiRNA_u_0928	CAAGACAUUGUGCCUGUUGGCUGC	Chr1	37612668	37612691	-		intergenic		10	10	4	4	2	5		0	0	0	0	0	0		6	9	2	9	2	2
masiRNA_u_0929	CAACGAAUCUGAAGAAUAAAUGAU	Chr1	39636015	39636038	-		repeat		2	8	2	3	1	0		0	0	0	0	0	0		10	1	3	2	4	2
masiRNA_u_0930	CUGAAAAGUUAUGUGUGAUGUGAU	Chr1	41190076	41190099	-		repeat		2	9	1	2	1	2		0	0	0	0	0	0		2	3	4	2	1	1
masiRNA_u_0931	CUACCGACCGAUGACCGAAACUUC	Chr1	41503062	41503085	-		repeat		9	1	2	1	3	3		0	0	0	0	0	0		0	0	0	0	0	0
masiRNA_u_0932	CUUUUUUUUCUAAUAUACCGACGU	Chr1	41592077	41592100	-		intergenic		4	6	4	1	2	1		0	0	0	0	0	0		2	0	2	1	0	1
masiRNA_u_0933	CAAAAGAGAGUGGUGACUGACAUG	Chr1	42018610	42018633	-		gene		8	2	0	1	1	3		0	0	0	0	0	0		1	1	0	0	1	0
masiRNA_u_0934	CCACACACAGAGGACGAAGGAAAG	Chr1	42286945	42286968	-		intergenic		5	5	3	0	0	0		0	0	0	0	0	0		1	7	1	0	0	1
masiRNA_u_0935	CAAUUGGAUGAUGAGCCACUCGCC	Chr1	42286987	42287010	-		intergenic		5	6	0	2	3	4		0	0	0	0	0	0		4	2	0	2	0	1
masiRNA_u_0936	CGACGAAUCUUUGAAACAAAAUAA	Chr1	42287152	42287175	-		intergenic		5	8	3	0	1	1		0	1	0	0	0	0		3	1	1	3	0	1
masiRNA_u_0937	CUUCCCUCUAUAAAAAAACUCAAU	Chr1	42297108	42297131	-		intergenic		8	7	5	1	3	0		0	0	0	0	0	0		3	7	4	1	2	4
masiRNA_u_0938	CUUUUAACUCUAACAUAAUAUGUC	Chr2	2196753	2196776	-		intergenic		4	12	5	6	2	8		0	0	0	1	0	0		8	5	7	6	2	3
masiRNA_u_0939	CUAUAUACUAGUGACUGUAAUGAU	Chr2	3357345	3357368	-		gene		0	14	14	22	5	13		0	0	0	0	0	0		10	15	9	14	4	9
masiRNA_u_0940	CUAAUAUAAGUACACCUGAACCGG	Chr2	5849909	5849932	-		repeat		7	16	7	9	4	6		0	0	0	0	0	0		13	14	12	4	7	7
masiRNA_u_0941	CUAGCUCUUGUUAUCUGUACCAGU	Chr2	5903851	5903874	-		intergenic		3	2	10	4	8	14		0	0	0	0	0	0		0	2	4	3	8	5
masiRNA_u_0942	CCUCUUGUAGAUACUAAUAUCAGU	Chr2	5904154	5904177	-		intergenic		3	1	6	1	6	6		0	0	0	0	0	0		2	0	1	2	3	1
masiRNA_u_0943	CAUAUAAGACUGAAGUUGACUGGC	Chr2	5905009	5905032	-		repeat		3	10	9	6	11	20		0	0	0	1	0	1		4	6	12	9	17	7
masiRNA_u_0944	CAAGCUUCCGUUGUUCUCUGAAAU	Chr2	5905277	5905300	-		repeat		23	28	35	54	61	99		0	0	0	0	0	0		29	20	40	26	71	44
masiRNA_u_0945	CAACCGGCUGAUUCUCCAUCUAAC	Chr2	5906264	5906287	-		intergenic		4	8	5	5	10	12		0	0	1	0	0	0		3	3	7	2	12	7
masiRNA_u_0946	CUAACUAAGUAACAACAUCUUCAC	Chr2	5937502	5937525	-		intergenic		0	0	0	0	2	9		0	0	0	0	0	0		0	0	0	0	0	0
masiRNA_u_0947	CAACGAUAAUUCAAUAGACAUGAC	Chr2	6001520	6001543	-		24-PHAS		0	0	4	12	15	49		0	0	0	0	0	1		0	0	1	0	2	3
masiRNA_u_0948	CAACUGUGCACAAUACGAGGAAAG	Chr2	6001596	6001619	-		24-PHAS		0	0	1	2	7	11		0	0	0	0	0	0		0	0	0	0	0	0
masiRNA_u_0949	CAAUAAAACUAAGACGCGACAAUC	Chr2	6011073	6011096	-		intergenic		1	0	2	7	10	17		0	0	0	1	0	1		0	0	0	0	0	0
masiRNA_u_0950	CUACAGCCAACUGAACAACGCCAU	Chr2	6011181	6011204	-		intergenic		0	0	4	4	3	10		0	0	0	0	0	0		0	0	0	0	1	2
masiRNA_u_0951	CUAUUCUUUGGACUUCAUCUCAAU	Chr2	6034730	6034753	-		24-PHAS		0	0	1	5	11	30		0	0	0	0	1	0		0	0	0	0	0	0
masiRNA_u_0952	CUUAUCCAAGUAGAACUAGGGAAA	Chr2	6165192	6165215	-		repeat		0	5	1	11	2	11		0	0	0	0	0	0		19	14	9	13	4	8
masiRNA_u_0953	CUAUCUAACUGUUGUCGACAUGGC	Chr2	6165508	6165531	-		repeat		15	18	16	12	7	13		0	0	0	0	0	0		27	21	12	9	5	7
masiRNA_u_0954	CAAUAUUAUCGAUUAUAGGAGUGU	Chr2	6397037	6397060	-		intergenic		5	6	7	5	6	4		0	1	1	0	0	0		2	7	4	1	4	3
masiRNA_u_0955	CAAUUGAUUUGUGCCGACGGAAAG	Chr2	6840382	6840405	-		24-PHAS		0	0	6	3	3	12		0	0	1	0	0	0		0	0	0	0	0	0
masiRNA_u_0956	CAACGGCUUAGAAUUAUUGAUGAU	Chr2	7639774	7639797	-		intergenic		42	186	24	66	13	34		1	3	0	0	0	0		118	65	61	48	18	28
masiRNA_u_0957	CAUGGCUACAAAUAGAUGAACUGU	Chr2	8256271	8256294	-		repeat		3	7	6	8	8	11		0	0	1	0	0	0		3	2	2	2	3	7
masiRNA_u_0958	CAAAGACUUUCAGGCACCAUUGAU	Chr2	8344219	8344242	-		intergenic		4	10	2	17	15	23		0	0	0	0	0	0		8	5	18	6	15	20
masiRNA_u_0959	CAAGAUUCAUUGGAUUGACGUCAG	Chr2	8345747	8345770	-		intergenic		0	2	0	0	2	9		0	0	0	0	0	0		0	3	2	1	2	5
masiRNA_u_0960	CUAUUUUUUUAAAUCGGAUCCAUG	Chr2	8351408	8351431	-		repeat		12	23	10	14	11	13		0	0	0	0	0	0		25	22	22	16	6	12
masiRNA_u_0961	CGGUUGAAAGUAAAACGAUGUGAU	Chr2	8358706	8358729	-		repeat		23	72	21	61	15	39		0	0	0	0	0	0		65	60	51	50	19	33
masiRNA_u_0962	CUAACCGUCCAUUUUUACUUAAAU	Chr2	8947687	8947710	-		repeat		5	15	3	8	12	6		0	0	0	0	0	0		17	6	10	5	0	2
masiRNA_u_0963	CAAAAUAAGGUCUAUUGCUGAGAU	Chr2	10216800	10216823	-		repeat		3	5	1	8	6	7		0	0	0	0	0	0		6	6	6	1	0	3
masiRNA_u_0964	CGAACUCUAGAACACUAUGUGUAU	Chr2	10876701	10876724	-		repeat		6	22	7	16	7	11		0	1	0	0	0	0		23	19	11	9	9	10
masiRNA_u_0965	CUUGACUGCACGGACCCUGUGGGA	Chr2	13139428	13139451	-		gene		0	5	1	3	6	6		0	0	0	0	0	0		3	3	5	3	4	5
masiRNA_u_0966	CUUUUCACUCUUGACUGCACGGAC	Chr2	13139437	13139460	-		gene		2	3	2	0	3	9		0	0	0	0	0	0		3	1	4	1	7	4
masiRNA_u_0967	CUAAGGUAAACGAAUUCUCACUUU	Chr2	13139528	13139551	-		gene		1	4	5	4	2	9		0	0	0	0	0	0		2	2	1	6	5	6
masiRNA_u_0968	CAGCUUUGAUUUGAGACAUUUGAG	Chr2	13584693	13584716	-		gene		0	3	1	7	4	14		0	0	0	0	0	0		5	2	10	2	4	4
masiRNA_u_0969	CGGGUGCUCGUAUUUAUGACUAAU	Chr2	17242094	17242117	-		repeat		23	20	21	13	10	14		0	0	0	0	0	0		9	8	7	4	8	7
masiRNA_u_0970	CAAUUUCUGAGAAUCUGUAAAAGC	Chr2	17967700	17967723	-		repeat		8	13	11	0	18	7		0	1	0	0	0	0		7	7	7	5	4	9
masiRNA_u_0971	CUCAAGACUUUUCUCGGACAUCGG	Chr2	17986479	17986502	-		repeat		14	17	4	4	5	6		0	1	0	0	0	0		14	7	9	3	3	6
masiRNA_u_0972	CUAUCAUUGUAUCGACUCUCUGAU	Chr2	19306778	19306801	-		intergenic		3	5	9	11	5	16		0	0	0	0	0	0		2	7	10	6	2	6
masiRNA_u_0973	CUAAAAAUAGAUCUUUAGGACUAA	Chr2	19390828	19390851	-		repeat		2	1	1	5	6	4		0	0	0	0	0	0		5	8	3	6	1	1
masiRNA_u_0974	CGAGGACGAUGACACUGAACAGUC	Chr2	19470049	19470072	-		gene		6	1	6	3	9	12		0	1	0	0	1	0		0	6	5	1	2	5
masiRNA_u_0975	CAGCAACAUGACGAGGACGAUGAC	Chr2	19470060	19470083	-		gene		2	5	6	5	5	20		0	1	0	0	0	0		6	5	3	2	18	4
masiRNA_u_0976	CAGUGGCGUAUCUAGAAAAUUGAU	Chr2	20051696	20051719	-		repeat		14	31	6	12	6	16		0	0	0	1	0	0		12	25	15	3	6	8
masiRNA_u_0977	CAAACAUAAGACUCUAAAGACAUG	Chr2	20687872	20687895	-		repeat		9	15	13	7	4	11		1	1	0	0	0	0		13	9	7	2	3	10
masiRNA_u_0978	CAUCUGAUGUGAUAGGGACUUAAA	Chr2	20840045	20840068	-		repeat		1	4	2	5	3	7		1	0	0	0	0	0		4	4	2	2	2	5
masiRNA_u_0979	CAACUGUGCAACUUAGGUCCCAAG	Chr2	22075083	22075106	-		intergenic		9	3	4	2	8	5		0	0	0	0	0	0		5	4	1	1	2	1
masiRNA_u_0980	CAAAGACAGUGUGUGUAUGACAAG	Chr2	24059045	24059068	-		repeat		12	16	15	12	14	8		0	0	0	0	0	0		9	13	10	8	9	9
masiRNA_u_0981	CUAACUGACGUAGAGACCACCCUC	Chr2	24368394	24368417	-		repeat		11	12	6	2	9	11		0	0	0	0	0	0		19	8	2	1	4	3
masiRNA_u_0982	CGGUCCUUUAGAAGUUAUCAUGAG	Chr2	24816662	24816685	-		repeat		14	9	6	3	3	8		0	0	0	0	0	0		2	4	4	1	3	1
masiRNA_u_0983	CAUACAACGAAUCUCUGGACAAAG	Chr2	33029980	33030003	-		repeat		3	4	5	2	6	5		0	0	0	0	0	0		1	3	1	2	1	0
masiRNA_u_0984	CAACGAAUCUUUGAACAUAUACAU	Chr2	33465670	33465693	-		repeat		5	9	3	2	5	6		0	0	0	0	0	0		3	6	3	5	2	0
masiRNA_u_0985	CUUCUCUUAUGUAAACUCUCAGUC	Chr2	33654731	33654754	-		repeat		6	8	4	2	9	2		1	0	0	0	1	0		4	10	5	3	3	5
masiRNA_u_0986	CUAAAAUGUUUUAGGGCGAAUGAA	Chr2	34357509	34357532	-		intergenic		5	5	2	7	3	10		0	0	0	0	0	0		15	15	13	1	6	9
masiRNA_u_0987	CUUCCAUCUUUAUGAUACUCUAAU	Chr2	34384925	34384948	-		repeat		14	12	41	25	48	31		0	0	1	0	0	0		10	8	26	17	16	28
masiRNA_u_0988	CGAAUUUAAACGGAUUGUGCUAAG	Chr2	35079253	35079276	-		intergenic		2	12	1	9	6	8		0	0	0	0	0	0		13	9	6	2	5	8
masiRNA_u_0989	CUUUCGGUUUCGGACGGACGUGUC	Chr2	942217	942240	-		repeat		16	12	6	4	4	3		0	0	1	0	0	2		2	4	3	3	2	0
masiRNA_u_0990	CGACAUGUGGGACAAUAAAAGAGU	Chr2	3357374	3357397	-		gene		14	11	11	3	0	5		3	3	1	1	1	0		12	2	7	2	1	7
masiRNA_u_0991	CAAGGCCUUAUCGGCUCUGGGCGU	Chr2	6167451	6167474	-		repeat		7	11	6	5	1	4		0	0	0	0	0	0		4	5	3	3	2	4
masiRNA_u_0992	CUACGAAUUAGAAUUAUUGAUGAU	Chr2	7639519	7639542	-		intergenic		4	15	3	10	0	7		0	0	0	0	0	0		9	5	2	11	1	6
masiRNA_u_0993	CUUCGUAUUGUUGAGCCACUUCAU	Chr2	10177541	10177564	-		repeat		6	19	3	9	0	5		0	0	0	0	0	0		7	7	7	4	0	3
masiRNA_u_0994	CAAGUGAUAUGAAUAAAUGACAGU	Chr2	11346420	11346443	-		gene		4	19	8	4	0	1		1	0	0	0	0	0		4	5	6	6	4	6
masiRNA_u_0995	CAAAUCGUAAUGGAUGGGACAGAU	Chr2	12773107	12773130	-		repeat		2	5	6	4	2	3		0	0	0	0	0	0		6	3	3	0	4	4
masiRNA_u_0996	CAAAACUUUGACAUCUAGUCCCAU	Chr2	20015756	20015779	-		intergenic		0	10	4	7	1	6		0	0	0	0	0	0		14	10	7	9	3	3
masiRNA_u_0997	CAAUUACGCGGCUAGUAUCUAGAU	Chr2	20026316	20026339	-		intergenic		0	2	3	8	1	0		0	0	0	0	0	0		3	2	4	1	1	0
masiRNA_u_0998	CAAAAGCAUAGUAACUUUAAACGU	Chr2	20962137	20962160	-		intergenic		0	0	4	7	0	0		0	0	0	0	0	0		1	0	3	4	1	1
masiRNA_u_0999	CAAUGAUACUGUGUUUGCUUUGGU	Chr2	26474999	26475022	-		intergenic		6	11	5	5	2	6		0	0	0	0	0	0		11	7	3	6	0	1
masiRNA_u_1000	CCAAAAAAAAUUGUAGAUUGCGGU	Chr2	27609764	27609787	-		repeat		0	3	0	11	0	1		0	0	0	0	0	0		4	4	4	3	0	2
masiRNA_u_1001	CACUUCUCUUAUGUAAACUCUCAG	Chr2	33654733	33654756	-		repeat		6	7	6	4	3	3		1	2	0	0	0	0		6	4	1	2	1	1
masiRNA_u_1002	CUUCCUUACAACGAAUCUGAACAG	Chr2	72753	72776	-		intergenic		5	5	0	3	4	4		0	0	0	0	0	0		6	4	6	2	3	6
masiRNA_u_1003	CAUUUUCUUACUUUAGCUCAUCGA	Chr2	848205	848228	-		intergenic		4	11	1	1	0	2		0	2	0	0	0	0		4	4	6	2	0	1
masiRNA_u_1004	CAAUGACAUGUGGGUCAGGAUGGC	Chr2	3674472	3674495	-		repeat		3	8	5	1	2	1		1	0	1	0	0	0		6	3	2	3	1	1
masiRNA_u_1005	CAUGUCACAGUAAAUCUUCCCAAC	Chr2	6108184	6108207	-		intergenic		6	10	3	2	1	0		0	0	0	0	0	0		10	2	11	0	0	1
masiRNA_u_1006	CCAGGAAAAUAAGAAGAAUGCGAG	Chr2	7373312	7373335	-		intergenic		4	6	1	0	1	0		0	0	0	0	0	0		3	1	0	2	0	2
masiRNA_u_1007	CUAAAAGAAGGUGACUAGAUGAGU	Chr2	7639841	7639864	-		intergenic		9	17	3	3	0	0		0	1	0	0	0	0		7	3	2	1	2	0
masiRNA_u_1008	CUUUCGGAUCAAAAUACUUACAUU	Chr2	8857540	8857563	-		gene		3	7	0	3	0	0		0	0	0	0	0	0		0	1	1	2	0	0
masiRNA_u_1009	CAAGUAAUUUCUGAGACCAUUGUU	Chr2	8857965	8857988	-		gene		1	14	0	3	0	0		0	0	0	0	0	0		9	3	3	2	1	3
masiRNA_u_1010	CUUCUGUUCAAUAUGUCAAUCUUU	Chr2	8858319	8858342	-		gene		3	10	0	1	0	2		0	0	0	0	0	0		1	3	2	2	0	0
masiRNA_u_1011	CAACUUCUGUUCAAUAUGUCAAUC	Chr2	8858322	8858345	-		gene		2	15	3	3	0	2		0	1	0	0	1	0		3	5	7	4	1	4
masiRNA_u_1012	CAACCAAAAAUAGGCCGUGGGCUC	Chr2	14615978	14616001	-		repeat		5	12	2	6	4	5		0	0	0	0	0	0		8	11	6	1	4	3
masiRNA_u_1013	CUUUAACCUGUACUCCCGAUUCGU	Chr2	16557306	16557329	-		repeat		8	4	3	1	1	3		0	0	0	0	0	0		3	1	1	1	0	1
masiRNA_u_1014	CUUCCGUCUCUAAAUACAAUAAAU	Chr2	18402121	18402144	-		repeat		5	6	3	1	2	5		0	0	0	0	0	0		4	4	1	1	3	3
masiRNA_u_1015	CUAGAAGCUGAAAAGGAAAAAAAU	Chr2	20016266	20016289	-		intergenic		5	21	0	4	0	4		0	0	0	0	0	0		12	8	3	6	3	5
masiRNA_u_1016	CUAUUUUAAGUGGAGCUGAAACUG	Chr2	20088673	20088696	-		repeat		6	12	3	4	5	0		0	0	0	0	0	0		9	5	5	1	4	5
masiRNA_u_1017	CGGUCUCUAAAACACAAUUUUGAU	Chr2	25203000	25203023	-		repeat		5	8	2	6	1	8		0	0	0	0	0	0		5	3	6	1	0	4
masiRNA_u_1018	CUUAUCUGACGUGUCUUGAGUGAU	Chr2	28009125	28009148	-		repeat		4	11	4	0	3	2		0	0	0	0	0	0		7	5	4	1	3	2
masiRNA_u_1019	CUUCAAUACGUUGUGUGUCUCUAG	Chr2	28293262	28293285	-		repeat		3	11	3	1	5	2		0	0	0	0	0	0		10	2	4	4	0	4
masiRNA_u_1020	CGGUCUCCGAAAUACUAUUUUGAU	Chr2	33462847	33462870	-		repeat		4	11	2	3	1	3		0	0	0	0	0	0		8	3	2	1	2	1
masiRNA_u_1021	CAAAAACUCUAAGACGUUACGUGU	Chr2	33882194	33882217	-		repeat		6	4	2	1	1	2		0	0	0	0	0	0		0	4	1	1	0	0
masiRNA_u_1022	CUGAGGAACACUGAGAGGCACAAG	Chr2	35108754	35108777	-		intergenic		8	4	0	1	2	0		0	0	0	0	0	0		3	2	1	0	0	3
masiRNA_u_1023	CUAUACAUCUGUAGCCCGUUGCUC	Chr3	548055	548078	-		repeat		6	5	2	0	4	8		0	1	0	0	0	1		9	5	1	4	1	1
masiRNA_u_1024	CGUCUCUGACUUAACUACUGCAUG	Chr3	1687773	1687796	-		gene		37	11	23	10	16	13		0	1	0	0	0	0		30	27	12	23	12	12
masiRNA_u_1025	CUGACAUGUGAACCCAGAGAUUAU	Chr3	1821607	1821630	-		intergenic		13	31	5	11	6	9		0	0	0	0	0	0		18	12	8	10	3	3
masiRNA_u_1026	CAUCUUGAUCUUGUCGUCUCCGAU	Chr3	2051901	2051924	-		intergenic		2	0	2	3	5	5		0	0	1	0	0	0		1	0	0	2	2	0
masiRNA_u_1027	CUAUCUCUCGUUUUCUGUGUACAC	Chr3	6889253	6889276	-		repeat		7	15	7	4	7	7		0	0	0	0	1	0		17	12	9	3	1	5
masiRNA_u_1028	CGAUCUCUAAUAUGCUACUUUGAC	Chr3	7811719	7811742	-		repeat		6	7	8	3	2	8		0	0	0	0	0	0		9	6	5	5	1	4
masiRNA_u_1029	CUUGGUCUGAUGAAAUUCUUAAAC	Chr3	7946378	7946401	-		intergenic		2	7	0	1	2	8		1	0	0	0	0	0		5	2	3	2	4	0
masiRNA_u_1030	CGAUUACGAAUAUAUGGAUGAAAU	Chr3	8968761	8968784	-		intergenic		10	24	17	30	9	20		0	0	0	0	1	0		30	23	18	15	15	18
masiRNA_u_1031	CUGAACCUGUAUAAAUCCUUUGUC	Chr3	9098388	9098411	-		repeat		5	13	1	6	6	8		0	0	0	0	0	0		16	7	4	3	3	1
masiRNA_u_1032	CAACCUCCAGCUGUCUAGAAACCU	Chr3	9303591	9303614	-		repeat		1	6	2	2	4	9		0	0	0	0	0	0		3	3	5	3	6	3
masiRNA_u_1033	CAUAAAUAAAUUAGAGAUGUGGAG	Chr3	9402216	9402239	-		repeat		1	5	3	4	3	9		0	1	1	0	0	0		7	1	3	3	3	4
masiRNA_u_1034	CGACACGGUCUCUAAAACACAAAU	Chr3	9688424	9688447	-		repeat		6	16	14	12	6	9		0	0	0	0	0	0		11	9	13	2	9	5
masiRNA_u_1035	CCUCUCUAGUUAUAUUUGAACAAG	Chr3	9698885	9698908	-		repeat		6	5	8	1	7	3		0	0	0	0	0	0		8	4	0	3	3	1
masiRNA_u_1036	CAAAUAUCUGAUGUGACACCCAAC	Chr3	10786124	10786147	-		repeat		4	4	1	3	8	3		0	0	0	0	0	0		5	9	3	1	5	2
masiRNA_u_1037	CAAAGUUGUGUUUUGGAGACCGUG	Chr3	11052080	11052103	-		repeat		45	28	33	17	32	35		2	1	0	0	0	0		22	34	26	20	14	18
masiRNA_u_1038	CAACUUAAAUCCGUCUCUAGUCAG	Chr3	11966502	11966525	-		repeat		16	11	14	8	10	19		0	0	0	0	0	0		17	6	5	9	4	7
masiRNA_u_1039	CUACGACUAUACGGAUUUUCCGAU	Chr3	13190168	13190191	-		gene		11	21	17	10	10	12		0	0	0	0	0	0		9	21	23	5	1	10
masiRNA_u_1040	CAGAGGAUUGUAGAACACAGAGAA	Chr3	13949190	13949213	-		repeat		5	8	4	4	3	9		0	1	0	0	0	0		14	11	7	7	9	11
masiRNA_u_1041	CUUAAAGACUGUGUCGAGAUUGAA	Chr3	14140452	14140475	-		repeat		17	25	20	18	14	33		0	0	0	0	0	0		21	25	14	13	12	9
masiRNA_u_1042	CUAAACCGUUUAACUUCUAGAAGC	Chr3	14533523	14533546	-		intergenic		12	24	18	16	13	21		0	0	0	0	0	0		28	18	21	22	13	20
masiRNA_u_1043	CAACACGAAUCUGGAUAGAACUAG	Chr3	15148115	15148138	-		repeat		1	3	1	1	6	5		0	0	0	0	0	0		2	1	2	4	0	1
masiRNA_u_1044	CUAAUAUCACGAAUCUGAACAAAG	Chr3	15903157	15903180	-		repeat		3	4	1	4	2	9		0	0	0	0	0	0		4	2	4	0	2	0
masiRNA_u_1045	CAUGUAUAUGUCACGUAGACCAAA	Chr3	16863701	16863724	-		repeat		2	5	2	5	1	14		0	1	0	0	0	0		27	18	16	11	5	7
masiRNA_u_1046	CAAAAUACGCUCGAUAGACAUGAU	Chr3	17120606	17120629	-		gene		8	30	11	16	4	23		0	1	0	0	0	0		32	38	23	17	8	4
masiRNA_u_1047	CAUUUAAUAGGGGUAAGACUGAAU	Chr3	17576085	17576108	-		repeat		63	225	59	124	44	197		1	1	4	0	0	0		184	165	127	87	76	95
masiRNA_u_1048	CAUUCUUCAGACAACUGUAUUCGC	Chr3	22254637	22254660	-		gene		6	1	10	16	7	10		0	0	0	0	0	0		8	5	3	0	0	3
masiRNA_u_1049	CUAGAUGAGACUUUCAGUGGUGAU	Chr3	22408579	22408602	-		intergenic		0	5	1	4	2	8		0	0	0	0	0	0		1	0	3	0	3	4
masiRNA_u_1050	CAAAUUUGAAAAUGUGGAGUAGAG	Chr3	22409068	22409091	-		intergenic		2	6	0	1	6	9		0	0	0	0	0	0		4	2	4	3	3	7
masiRNA_u_1051	CAAAGAUGAGUCAUCUCUGACGGG	Chr3	22715726	22715749	-		intergenic		64	47	34	13	42	36		2	2	0	1	0	0		21	33	24	17	14	17
masiRNA_u_1052	CUUUGAUUUGUUGGAAAAAUAGAG	Chr3	22863174	22863197	-		repeat		3	16	12	11	14	23		0	0	0	0	0	0		18	20	8	13	7	17
masiRNA_u_1053	CUAUCACAAGUGAGAGUAGACGGU	Chr3	23602119	23602142	-		intergenic		11	17	10	6	9	2		0	0	0	0	0	0		5	6	2	4	2	6
masiRNA_u_1054	CUAAUUUUUAAUUUCGGGACUAAG	Chr3	24462301	24462324	-		intergenic		17	30	7	6	8	11		0	0	0	0	0	0		15	15	13	13	5	13
masiRNA_u_1055	CUAUUACUACUUCUUGAACUGCGU	Chr3	24569778	24569801	-		repeat		1	2	2	1	3	7		0	0	0	0	0	0		2	1	4	0	1	3
masiRNA_u_1056	CUACUGACAAUAGGACUAUGAGAG	Chr3	24865400	24865423	-		intergenic		3	13	4	5	8	8		0	0	1	0	0	0		13	5	4	3	2	9
masiRNA_u_1057	CUAGUACAACGAAUCUGACAUGAC	Chr3	25185659	25185682	-		repeat		17	32	17	11	18	31		0	1	1	0	0	0		33	28	33	15	8	10
masiRNA_u_1058	CAAGACGGAAUAUGUGUAUGACAU	Chr3	25562993	25563016	-		repeat		5	11	4	5	7	10		0	0	0	0	0	0		12	3	3	5	4	4
masiRNA_u_1059	CUUCCGUCAGUGCUGAGGAUCAAG	Chr3	26124451	26124474	-		intergenic		1	1	1	2	4	6		0	0	0	0	0	0		3	0	5	2	3	4
masiRNA_u_1060	CUAGAUUUAGUUUUUUGGACGGAG	Chr3	26505348	26505371	-		gene		3	9	5	11	2	8		0	0	0	0	0	0		9	7	8	2	3	3
masiRNA_u_1061	CACGGAAAAAAUAAGUACAGACAG	Chr3	27331707	27331730	-		intergenic		3	6	4	4	4	10		0	1	0	0	0	0		5	3	3	2	2	2
masiRNA_u_1062	CUAAUACAAUGAAUCUGGACGGGU	Chr3	28913767	28913790	-		repeat		69	33	25	16	29	16		0	0	0	0	0	0		14	19	10	7	5	3
masiRNA_u_1063	CUUUAUCGUAUUCUAUGGACACAU	Chr3	30355349	30355372	-		intergenic		4	6	4	3	4	6		0	0	0	0	0	0		3	2	4	1	2	1
masiRNA_u_1064	UAUUAUAUACUCUUCUGUCUGAUU	Chr3	30572124	30572147	-		gene		1	1	4	3	8	3		0	0	0	1	2	1		0	0	0	1	1	3
masiRNA_u_1065	CAAGGGGUUACGAACCGGGACUAC	Chr3	30967159	30967182	-		repeat		3	7	3	6	3	7		0	0	0	0	0	0		9	3	3	1	2	1
masiRNA_u_1066	CAAGACUUAGAGCAUCUCCAACAG	Chr3	31019737	31019760	-		intergenic		7	6	6	5	7	8		0	0	0	0	0	0		13	2	6	6	2	3
masiRNA_u_1067	CUUUCCGACAUACAGACAAACAUC	Chr3	34514344	34514367	-		repeat		27	54	26	25	22	31		0	0	1	0	0	0		30	29	38	20	12	16
masiRNA_u_1068	CUAGGAAUUGAACCCGAAAGACAG	Chr3	34989015	34989038	-		repeat		8	7	3	0	8	5		0	0	0	0	0	1		8	10	9	5	1	1
masiRNA_u_1069	CUAUAUGAUGACAGAAGACGUGAU	Chr3	36368413	36368436	-		repeat		8	11	7	3	6	14		0	1	0	0	0	0		7	12	4	5	0	3
masiRNA_u_1070	CAAAUUAAAGAUGAUGUGACUGAA	Chr3	1037364	1037387	-		repeat		0	21	4	8	2	7		0	0	0	0	0	0		6	7	9	5	2	4
masiRNA_u_1071	CUACGAGCUGUUUGUUACUCCAAU	Chr3	4377474	4377497	-		intergenic		2	11	4	8	2	4		0	0	0	0	0	0		10	11	5	6	1	6
masiRNA_u_1072	CGACCGGAUUCGGAUUCCACCGCC	Chr3	7367346	7367369	-		gene		4	3	6	5	3	0		0	0	0	0	0	0		2	2	2	0	1	1
masiRNA_u_1073	CUAAACGUCGCUCUUCGAACAGAG	Chr3	8806961	8806984	-		intergenic		3	2	9	5	4	3		0	0	1	0	0	0		6	11	4	2	0	5
masiRNA_u_1074	CAACGGACUACAAAAGAAUACAAU	Chr3	14143749	14143772	-		intergenic		5	6	5	8	1	2		0	0	0	0	0	0		9	0	2	4	3	4
masiRNA_u_1075	CAAGACCUAUUACAUCUGCACGUG	Chr3	22326997	22327020	-		intergenic		22	14	9	3	6	1		0	0	0	0	0	0		2	6	1	2	1	1
masiRNA_u_1076	CAUCUUCUGUUAGAACUUAACGGU	Chr3	26685030	26685053	-		intergenic		6	4	8	4	1	1		0	0	0	0	0	0		0	5	1	2	3	1
masiRNA_u_1077	CCGAAAAUAGUAGGACCAUGUGAG	Chr3	35864628	35864651	-		intergenic		11	9	4	9	2	4		0	0	0	0	0	0		8	6	7	6	2	7
masiRNA_u_1078	CAUCUCUGUGCUCAGCCUCGGCCC	Chr3	461336	461359	-		intergenic		7	13	1	2	0	0		2	0	0	0	0	0		5	9	3	2	0	0
masiRNA_u_1079	CAUAAGAGAGACUAGAGACAAGAG	Chr3	461736	461759	-		intergenic		3	11	1	1	2	1		1	1	0	0	0	0		6	4	2	0	0	1
masiRNA_u_1080	CUCUUCACUGUAAACAUAUGGUCC	Chr3	3450846	3450869	-		repeat		5	5	3	3	4	5		0	1	0	1	0	0		14	7	5	4	1	3
masiRNA_u_1081	CAAAUGCACGCCGAGAUCACUUAG	Chr3	4456875	4456898	-		intergenic		1	9	2	0	3	0		0	0	0	0	0	0		4	0	1	0	0	0
masiRNA_u_1082	CAACAUUGUCAUGCCGGUCUAGAU	Chr3	8325037	8325060	-		repeat		11	6	1	4	1	2		0	0	0	0	0	0		4	3	2	3	1	4
masiRNA_u_1083	CUACGUAGCGAUGUUGACUCAGUC	Chr3	8919224	8919247	-		repeat		4	6	5	3	1	4		0	0	0	0	0	0		13	4	1	3	2	2
masiRNA_u_1084	CAUGAUCAGAUAGAGCGCUCUCAU	Chr3	9402237	9402260	-		repeat		7	12	4	3	1	6		0	0	0	0	0	0		10	0	3	2	2	0
masiRNA_u_1085	CUAGAAUAAAAAAAAUGAUGUGGC	Chr3	11366558	11366581	-		repeat		4	6	1	1	2	2		0	1	0	0	0	0		3	3	1	0	2	1
masiRNA_u_1086	CUAUUCAUUGGGCUUAGACGAAAU	Chr3	12227890	12227913	-		intergenic		3	10	4	2	1	2		0	0	0	0	0	0		8	3	4	0	2	3
masiRNA_u_1087	CAUCUAAUUUUAGCAUGGACAGAG	Chr3	14074729	14074752	-		repeat		3	7	1	0	2	1		0	0	0	0	0	0		2	4	6	1	2	2
masiRNA_u_1088	CAACACACGGUACUUCAGAUUCAC	Chr3	14297082	14297105	-		gene		3	9	3	1	0	3		0	0	0	0	0	0		9	4	2	3	3	2
masiRNA_u_1089	CAUAUUCACGAUCUCUCAGCCACC	Chr3	17120402	17120425	-		gene		21	20	4	2	0	3		2	4	1	0	0	0		9	5	2	1	0	1
masiRNA_u_1090	CAAUGAGACAUAUUGAACAAAGGU	Chr3	20703204	20703227	-		intergenic		2	9	1	3	0	2		0	0	0	0	0	0		7	5	1	5	1	1
masiRNA_u_1091	CUACUAAUCAAUCUGGACACGUGU	Chr3	21063815	21063838	-		repeat		3	7	7	2	1	1		0	0	0	0	0	0		2	2	2	4	3	1
masiRNA_u_1092	CAUGUGCUCUCUAAUCAAAUUAAG	Chr3	22918707	22918730	-		intergenic		10	8	6	0	2	2		0	0	0	0	0	0		2	3	2	0	0	2
masiRNA_u_1093	CUACAAUGUAUUAGAGACGCGAGC	Chr3	24463456	24463479	-		repeat		6	6	4	2	3	2		0	1	0	0	0	0		4	3	2	0	0	2
masiRNA_u_1094	CAUUACUAAAUACUACUCUACAUC	Chr3	24586706	24586729	-		repeat		3	7	0	1	0	0		0	0	0	0	0	0		3	6	2	2	1	3
masiRNA_u_1095	CGGACGGAGUAAUUUAUGAGUAAU	Chr3	24801236	24801259	-		repeat		3	8	0	0	0	1		0	0	0	0	0	0		4	2	1	0	2	1
masiRNA_u_1096	CUUCAGACUAAUGUUGCACCGGUU	Chr3	26465351	26465374	-		repeat		5	5	0	1	1	0		0	0	0	0	0	0		1	1	0	0	0	0
masiRNA_u_1097	CUAUCCGUCGAACCAAACAAAAAU	Chr3	30632358	30632381	-		repeat		1	9	0	4	0	7		0	0	0	0	0	0		7	4	9	1	1	2
masiRNA_u_1098	CCAACCAAGGAUCUGUAAUGCUAC	Chr3	31664823	31664846	-		intergenic		8	8	4	1	2	3		0	0	0	0	0	0		2	2	2	1	1	2
masiRNA_u_1099	CUAAGUCUAUCUCUCUCAUCUGAU	Chr3	31767424	31767447	-		repeat		2	11	3	1	3	5		0	0	0	0	0	0		6	6	3	1	3	1
masiRNA_u_1100	CAAGUCUGACUAGAGCGAGCCCAG	Chr3	33203884	33203907	-		intergenic		6	4	1	0	0	4		0	0	0	0	0	0		2	1	3	1	1	4
masiRNA_u_1101	CUUCCUAAAAUUAACUCCGUAAAU	Chr3	33263396	33263419	-		intergenic		3	7	2	3	0	2		0	0	0	0	0	0		2	0	4	2	2	1
masiRNA_u_1102	CAACCUAUUGACAACUCAAACAUG	Chr3	33263851	33263874	-		intergenic		6	6	5	2	0	0		0	0	0	0	0	0		3	3	4	1	0	1
masiRNA_u_1103	CUUUUUACUGUCCUCGUCAUUGAC	Chr3	33361986	33362009	-		gene		7	8	3	2	4	3		0	0	0	0	0	0		5	4	2	3	0	1
masiRNA_u_1104	CUAAGGAAGUUUGAAUUGAUAAGC	Chr3	33742656	33742679	-		intergenic		8	5	7	0	0	0		0	0	0	0	0	0		6	8	6	3	0	1
masiRNA_u_1105	CGACUAACUCUUUAAACUUAACAU	Chr3	34733090	34733113	-		repeat		3	8	0	4	2	6		0	0	0	0	2	0		5	5	3	2	3	3
masiRNA_u_1106	CUAACAUGUGAGCCCGAAAAUAGU	Chr3	35864641	35864664	-		intergenic		1	10	2	1	0	0		0	1	0	0	0	0		3	0	1	0	0	0
masiRNA_u_1107	CUAUUACAACGAAUCUGGACAAAG	Chr4	2288843	2288866	-		repeat		6	9	6	2	12	11		0	0	1	0	0	0		5	14	11	10	7	12
masiRNA_u_1108	CAGAUUUAUAGCCAGCUGUAGCAC	Chr4	2406292	2406315	-		repeat		3	8	4	15	2	8		0	0	0	0	0	0		9	5	4	2	3	5
masiRNA_u_1109	CCGGGUGACGAAGUUGGAUACGAG	Chr4	4972185	4972208	-		repeat		11	18	10	4	3	13		0	0	0	0	0	0		18	12	5	5	6	4
masiRNA_u_1110	CUGAUCUAGUUGGCGUGACAUAAU	Chr4	6485463	6485486	-		intergenic		12	20	5	4	8	5		0	1	0	0	0	0		13	7	3	4	1	1
masiRNA_u_1111	CUAAAAAACAUUGCGGAUAGACUG	Chr4	11524747	11524770	-		intergenic		20	48	16	25	8	16		0	0	0	1	0	0		16	26	16	12	2	9
masiRNA_u_1112	CGACCACGCAGCAUUCCUGAAAAU	Chr4	14218057	14218080	-		intergenic		4	5	9	11	15	11		0	0	0	0	0	0		7	4	5	5	20	17
masiRNA_u_1113	CUGGAAUUCAUGGAUUUGGUAAGA	Chr4	16016668	16016691	-		24-PHAS		0	0	15	8	20	25		0	0	0	0	1	0		0	0	0	0	0	1
masiRNA_u_1114	CAUAAAUUUGUAGUUCUGCUUGAG	Chr4	17576392	17576415	-		intergenic		13	14	6	15	5	12		0	0	0	0	0	0		15	20	4	18	1	7
masiRNA_u_1115	CUACUGUACUUCUCUAACUAGCUC	Chr4	18217974	18217997	-		repeat		0	0	3	4	1	13		0	0	1	0	1	0		0	0	0	0	0	0
masiRNA_u_1116	CUAGCUUAGUCCUCAUGAAUUCAA	Chr4	18234280	18234303	-		24-PHAS		0	0	2	2	3	9		0	0	0	0	0	1		0	0	0	1	1	3
masiRNA_u_1117	CAAAACUAGGUCGUUUUGACGUGA	Chr4	18234378	18234401	-		24-PHAS		0	0	2	0	2	14		0	0	0	0	0	0		0	0	0	0	0	2
masiRNA_u_1118	CUAAGAACUGUAUUUGCCACAUGC	Chr4	19248007	19248030	-		intergenic		11	4	8	2	12	6		0	0	0	0	0	0		9	9	7	7	4	6
masiRNA_u_1119	CAAUGACGUGUAGGGUAUCUCAAU	Chr4	19328898	19328921	-		repeat		66	95	55	60	59	82		0	0	2	0	0	0		64	75	57	32	47	41
masiRNA_u_1120	CAGUGGUAACUAGUAAGAAGAGAU	Chr4	20940237	20940260	-		intergenic		6	17	6	5	4	6		0	0	0	0	0	0		5	5	6	5	4	3
masiRNA_u_1121	CAACGACAUAGUCACUGGGACACU	Chr4	21291688	21291711	-		gene		19	38	13	19	10	21		0	1	2	0	0	0		31	29	10	6	17	14
masiRNA_u_1122	CUAAAACAACGAAUCUGAUCAAGC	Chr4	22195883	22195906	-		repeat		13	13	6	6	14	8		0	0	0	0	0	0		6	7	4	1	4	8
masiRNA_u_1123	CUAUCCUAAAACAACGAAUCUGAU	Chr4	22195888	22195911	-		repeat		3	7	5	19	1	21		0	0	0	0	0	0		16	20	16	12	9	18
masiRNA_u_1124	CAAUCUCAAGAUAUGUCGGUCCAG	Chr4	22221396	22221419	-		repeat		9	6	6	3	7	5		0	0	0	0	0	0		4	3	1	0	1	1
masiRNA_u_1125	CAAAGAUUGAUGAAAUGCGGGCGU	Chr4	22264888	22264911	-		repeat		8	17	5	4	3	7		2	1	1	0	0	0		15	7	8	2	1	4
masiRNA_u_1126	CCAAAAUAUGAUACCAGGCCUGAU	Chr4	22321026	22321049	-		intergenic		15	26	5	8	1	12		0	0	0	0	0	0		16	5	20	3	7	9
masiRNA_u_1127	CAGUCGACUGCAGAGGAUCCCAAU	Chr4	23142887	23142910	-		intergenic		6	18	1	11	2	11		0	0	1	0	0	0		20	3	5	2	9	4
masiRNA_u_1128	CAAACAGGAGUAGAGUAUUAUGAG	Chr4	24085465	24085488	-		repeat		3	7	4	2	7	5		0	0	0	0	0	0		10	2	1	2	4	2
masiRNA_u_1129	CUAUAGUUUAUUAAAGGUACUGGU	Chr4	26009456	26009479	-		intergenic		0	6	2	15	2	8		0	0	0	0	0	0		8	6	9	13	3	7
masiRNA_u_1130	CAAGUAAUUUCCGAACUAAUUUGU	Chr4	26730932	26730955	-		repeat		1	2	3	4	7	5		0	0	0	0	0	0		0	0	4	1	1	2
masiRNA_u_1131	CAACGGCUGGUAGAGUUUGAUACC	Chr4	27606555	27606578	-		gene		7	8	9	1	9	3		0	0	0	0	0	0		7	6	5	2	3	2
masiRNA_u_1132	CUUCGGAUCUUGGACGGACGUGCC	Chr4	27689739	27689762	-		repeat		210	104	77	19	59	40		4	2	0	1	0	1		62	66	33	22	19	17
masiRNA_u_1133	CUAGACAUGUAUAUCCGGAUUCGU	Chr4	27848736	27848759	-		repeat		6	18	8	17	5	12		1	1	0	0	0	0		19	9	12	9	5	2
masiRNA_u_1134	CAGUGGGCUAUAAAUUUUAAGGAG	Chr4	28862448	28862471	-		repeat		4	10	3	4	8	2		0	1	0	0	0	0		5	3	1	1	3	1
masiRNA_u_1135	CAAGGACGUUAGCUCUCAUGCAAG	Chr4	29436672	29436695	-		repeat		14	2	13	1	11	5		0	0	0	0	0	0		5	6	3	1	4	1
masiRNA_u_1136	CUACAAAUCUUAAUAUAACUCUGU	Chr4	29848330	29848353	-		repeat		8	8	9	10	6	18		0	0	1	0	0	0		11	14	16	7	5	7
masiRNA_u_1137	CAACUGACAUGUGGGCUCUACGGU	Chr4	33114392	33114415	-		repeat		6	9	2	0	7	6		0	0	0	0	0	0		4	5	0	1	0	3
masiRNA_u_1138	CUUCUAACAUCUGUUCAAACGUUC	Chr4	33695159	33695182	-		repeat		22	9	11	8	4	9		1	0	0	0	0	0		9	5	1	4	2	3
masiRNA_u_1139	CGGCAAAAAAUAUUGGAUUAUGAG	Chr4	35051738	35051761	-		intergenic		7	18	26	19	28	42		0	0	0	0	0	0		16	8	19	18	18	28
masiRNA_u_1140	CUAAGGCGGGUCUGUCGAUGUGGU	Chr4	35052235	35052258	-		intergenic		0	6	2	2	3	7		0	0	0	0	1	1		1	1	1	2	4	2
masiRNA_u_1141	CUAGCCGACCUGGAUUAAAGUCUC	Chr4	35054348	35054371	-		repeat		7	2	5	4	11	3		0	0	1	0	0	0		8	9	9	5	7	6
masiRNA_u_1142	CUAGAUCUAUGUAACCAUGAACAG	Chr4	349871	349894	-		intergenic		12	8	5	5	1	5		0	0	0	1	0	0		10	6	9	5	2	6
masiRNA_u_1143	CUACCGUUUGAUCAAAAAAUAGAC	Chr4	4489481	4489504	-		repeat		1	2	3	8	1	3		0	0	0	0	0	0		2	1	1	2	1	2
masiRNA_u_1144	CUAAAAGAGUCUCUGCAAGAACAG	Chr4	6926209	6926232	-		gene		3	2	6	5	4	5		0	0	0	0	0	0		5	6	5	2	1	0
masiRNA_u_1145	UGUCCGUGAGAUUUGGGAUUUGUG	Chr4	16016701	16016724	-		24-PHAS		0	0	6	4	0	1		0	0	0	0	0	0		0	0	0	0	0	0
masiRNA_u_1146	CUGCCAGAUCUAUAGAGACAUCGU	Chr4	25750125	25750148	-		intergenic		3	4	7	3	4	1		0	0	0	0	0	0		3	2	0	0	1	1
masiRNA_u_1147	CUAUCAAUUGCAUGCGACUCAAAU	Chr4	26809472	26809495	-		intergenic		5	5	7	6	2	6		0	0	0	0	0	0		11	7	6	11	2	4
masiRNA_u_1148	CAAAUAUUUGAUGUGACGGAAAAG	Chr4	30722134	30722157	-		repeat		5	7	4	6	5	4		0	0	0	0	0	0		5	5	1	4	5	2
masiRNA_u_1149	CUUCAAGGUGUAUGUGUGUAUGAU	Chr4	34455236	34455259	-		repeat		4	8	2	8	4	2		0	0	0	0	0	0		6	2	4	3	0	2
masiRNA_u_1150	CAGUCAAAUGAGGCUUUGGACCGG	Chr4	34743117	34743140	-		repeat		5	7	3	7	2	4		1	0	0	0	0	0		3	6	4	5	2	2
masiRNA_u_1151	CUUCCGAGAGAGAAACCUGCAACG	Chr4	633965	633988	-		intergenic		6	7	1	0	0	1		2	0	0	0	0	0		2	3	3	0	0	2
masiRNA_u_1152	CUUAACUUAAACGAUGGACGUAAU	Chr4	1265208	1265231	-		intergenic		3	21	0	2	3	5		0	0	0	0	0	0		45	21	9	22	16	35
masiRNA_u_1153	CUAUAUUUUAAUGUAUGACGCCGU	Chr4	1769297	1769320	-		repeat		3	7	1	0	0	2		0	0	0	0	0	0		6	3	0	1	1	1
masiRNA_u_1154	CCACAAAAAUGUAACACGGCUGAU	Chr4	5484405	5484428	-		repeat		2	8	6	2	3	5		0	0	1	0	0	0		7	8	5	4	2	3
masiRNA_u_1155	CUAGGCGACGUACUUAUUAACAAC	Chr4	7141015	7141038	-		repeat		2	8	2	3	3	6		0	0	0	0	0	0		10	6	1	5	2	6
masiRNA_u_1156	CAAAUGUUGGAACUUCCGUACCCU	Chr4	11522800	11522823	-		intergenic		4	8	2	3	1	1		0	0	0	0	0	0		5	4	0	1	0	0
masiRNA_u_1157	CCAUGAUCUUUAGAGCUAAUAAAA	Chr4	16834313	16834336	-		intergenic		5	9	3	4	3	2		0	0	0	0	0	0		9	10	2	4	0	1
masiRNA_u_1158	CUAGGAACUGUGCCGCGACCAAAU	Chr4	18235014	18235037	-		intergenic		9	17	1	1	1	0		0	0	0	0	0	0		7	2	1	3	0	1
masiRNA_u_1159	CUUAAAAAAAUAGAAAAGGACUAG	Chr4	20637126	20637149	-		repeat		8	5	5	2	2	2		0	0	0	0	0	0		6	5	3	1	1	3
masiRNA_u_1160	CUGACAUGUAGACCCUGGGUCAAC	Chr4	21275177	21275200	-		intergenic		3	7	0	1	2	0		1	0	0	0	0	0		1	1	0	0	3	0
masiRNA_u_1161	CAAAUUGGUGACAUGUAGGGCGUU	Chr4	22996943	22996966	-		intergenic		5	7	1	1	3	0		0	0	0	0	0	0		0	0	0	0	0	0
masiRNA_u_1162	CUUACUCGUGUUGACGUGGACGAA	Chr4	23385663	23385686	-		repeat		2	10	2	6	1	4		0	0	0	0	0	0		3	4	0	1	0	1
masiRNA_u_1163	CAUCCGAUCUUAGGUUUAUAGUAU	Chr4	24009004	24009027	-		repeat		4	8	3	1	4	3		0	1	0	0	0	0		2	4	2	1	1	0
masiRNA_u_1164	CAACAAACAGCAGAACCAGACGAG	Chr4	25228323	25228346	-		gene		6	5	3	0	2	4		0	0	0	0	0	0		0	0	0	0	0	0
masiRNA_u_1165	CUAUCCCCUGAAACUGAACACAGC	Chr4	25640002	25640025	-		repeat		5	7	0	1	2	2		0	0	0	0	0	0		6	1	1	0	0	0
masiRNA_u_1166	CAUCUAUACUGAGUCGGCCCCGUG	Chr4	27242506	27242529	-		intergenic		8	6	0	1	0	1		0	0	0	0	0	0		5	2	1	0	3	2
masiRNA_u_1167	CAUCAAAUAUUUGGACACAUGCAU	Chr4	30431141	30431164	-		repeat		1	11	1	0	1	1		0	0	0	0	0	0		6	2	1	1	2	1
masiRNA_u_1168	CUCUCCAGAUUUGUUGUACUAGAU	Chr4	30585123	30585146	-		repeat		3	9	1	1	2	2		0	0	0	0	0	0		4	4	4	3	1	0
masiRNA_u_1169	CGAUCUCACUAAAAUCCUGUUGAA	Chr5	338262	338285	-		intergenic		2	4	1	4	2	9		0	0	0	0	0	0		9	6	2	4	6	3
masiRNA_u_1170	CUACGAAUCUGAAUAUAUCCAUAU	Chr5	967191	967214	-		repeat		2	12	4	7	7	9		0	0	2	0	0	0		13	8	14	4	3	2
masiRNA_u_1171	CAUCGGAUCCUUCCUUAGAGCAAG	Chr5	2120807	2120830	-		repeat		9	4	7	5	8	4		0	1	0	0	0	0		7	5	4	2	3	5
masiRNA_u_1172	CUAUCAUAUGUUGGGCUCUGUGGU	Chr5	2441672	2441695	-		repeat		12	6	6	2	7	3		0	0	0	0	0	0		4	2	2	4	0	4
masiRNA_u_1173	CAAGACAACCGUUCCUGAGCACAG	Chr5	8299001	8299024	-		repeat		14	7	5	1	11	7		0	0	1	0	0	0		9	11	1	3	6	2
masiRNA_u_1174	CAAGAAUUCUUUGACAUGUGACAA	Chr5	10918737	10918760	-		intergenic		0	0	1	2	4	9		0	0	0	0	0	0		0	0	1	2	2	4
masiRNA_u_1175	CAUGACAUGGUUGUAGGUACAAUU	Chr5	11243146	11243169	-		intergenic		2	4	2	2	8	10		0	0	0	0	0	0		5	4	3	1	3	3
masiRNA_u_1176	CAGCCCAAAUUAAUUGAACAUGAU	Chr5	11243820	11243843	-		intergenic		1	2	1	8	2	8		0	0	1	0	0	0		4	7	3	2	6	6
masiRNA_u_1177	CUAAGAGAGAUAGAUGUUGGACGU	Chr5	11244300	11244323	-		intergenic		2	3	2	7	9	9		0	1	0	0	0	0		5	2	3	1	4	2
masiRNA_u_1178	CAAGGACUAUCGGAACCAAGCAAG	Chr5	11244478	11244501	-		intergenic		7	10	12	13	11	20		0	0	1	0	0	0		12	7	11	16	11	13
masiRNA_u_1179	CUGGAUUGUGCACUGAGUGAAAAG	Chr5	11244879	11244902	-		intergenic		1	3	1	0	9	9		0	1	0	0	0	0		4	2	4	3	7	3
masiRNA_u_1180	CUAGCCGACUAGGACCGCACUCAU	Chr5	11245001	11245024	-		intergenic		6	7	2	1	9	8		0	0	0	0	0	0		2	3	9	3	3	8
masiRNA_u_1181	CAAACAUCUGAUGUGACAAGGACU	Chr5	11251056	11251079	-		repeat		1	6	2	6	0	12		0	0	0	0	0	0		10	14	4	11	2	8
masiRNA_u_1182	CAAAUAGUAGAUUAAUGAGCCGAU	Chr5	12293745	12293768	-		repeat		3	6	5	7	2	18		0	0	1	0	0	0		5	6	6	8	1	5
masiRNA_u_1183	CAAGAACUCGUCCUGCGUCAUUGC	Chr5	16667856	16667879	-		gene		8	2	3	0	6	4		0	0	0	0	0	0		4	1	0	0	1	3
masiRNA_u_1184	CAAAAGGUUGGAGUCUAGUGCAAG	Chr5	18853638	18853661	-		intergenic		39	83	7	9	7	8		0	3	1	0	0	0		35	21	12	8	7	6
masiRNA_u_1185	CUAAGAUGAAAAGUGACGUGGCAA	Chr5	19041676	19041699	-		repeat		6	7	1	1	7	3		0	0	0	0	0	0		5	4	1	1	2	2
masiRNA_u_1186	CAUGGAGUAUUAAUUGUGGACGAA	Chr5	19965020	19965043	-		repeat		4	14	5	3	3	16		0	0	1	0	0	2		12	7	8	5	5	2
masiRNA_u_1187	CUACGAAUUCAGGACUAAAGAUCC	Chr5	20759073	20759096	-		repeat		0	1	1	1	2	10		0	0	0	0	0	0		0	2	3	1	1	0
masiRNA_u_1188	CAAAAACGUGAAUUGCCUAAGGAC	Chr5	21187527	21187550	-		repeat		1	6	1	8	5	8		0	0	0	0	0	0		8	10	4	3	7	2
masiRNA_u_1189	CAAGACGUAGUAUGUGUAUGACAG	Chr5	21652161	21652184	-		repeat		10	24	11	9	6	15		0	1	1	0	0	0		27	22	18	8	5	7
masiRNA_u_1190	CAAGGAAAAUCAAUCAUGUAGUAG	Chr5	22030403	22030426	-		repeat		4	14	7	8	3	7		0	0	0	0	0	0		11	8	8	7	0	4
masiRNA_u_1191	CUACGACUUAUGGAAUAUACCGAU	Chr5	22144988	22145011	-		repeat		34	38	28	29	38	62		0	1	1	0	0	0		29	35	27	12	14	14
masiRNA_u_1192	CUAAGAACUGUAUUUAUCAUAUGC	Chr5	23460597	23460620	-		intergenic		7	14	13	11	17	22		0	0	0	0	0	0		9	17	12	10	2	12
masiRNA_u_1193	CAAAGUUGAACGUAGAAAACCAUG	Chr5	24737490	24737513	-		repeat		3	10	8	3	6	13		0	0	0	0	0	0		8	5	7	7	3	5
masiRNA_u_1194	CAAGGCGAUGUCGGCGUAGUCCAC	Chr5	25355666	25355689	-		repeat		1	4	1	5	3	7		0	1	0	1	1	0		1	3	1	3	3	1
masiRNA_u_1195	CAACCUUGUAUGAUAUGAACGAUG	Chr5	25355900	25355923	-		intergenic		5	12	9	18	20	25		0	0	1	0	0	0		10	12	16	8	9	19
masiRNA_u_1196	CUUCAAAAGAGAGUGUAGUUCAAG	Chr5	25620198	25620221	-		repeat		6	11	6	17	3	17		1	0	0	0	0	0		12	6	13	7	8	16
masiRNA_u_1197	CUAGAGACUAUAUGCUACAACAAU	Chr5	28469692	28469715	-		intergenic		4	14	8	8	6	11		0	0	1	0	0	0		12	15	7	6	6	6
masiRNA_u_1198	CUACGUUAUCUAGAGACUAUAUGC	Chr5	28469701	28469724	-		intergenic		6	3	3	6	4	13		0	0	0	0	0	0		9	10	12	3	3	1
masiRNA_u_1199	CAGAUAGCAAUAUUUUAGGACGAG	Chr5	28877729	28877752	-		intergenic		2	11	5	6	6	6		0	0	0	0	0	0		3	3	2	2	1	4
masiRNA_u_1200	CAAGUGAAGUUGUGGAUAUAUGAU	Chr5	1750252	1750275	-		intergenic		7	21	6	6	2	6		0	0	0	0	0	0		9	5	3	5	2	7
masiRNA_u_1201	CUGUAGUGACUAGAAAGAGACGAG	Chr5	3661733	3661756	-		gene		5	11	7	5	6	3		0	0	0	0	0	0		5	6	4	1	2	1
masiRNA_u_1202	CUGAAAAAGAAUGUAGACGCUACC	Chr5	7576789	7576812	-		intergenic		11	14	6	6	1	1		0	0	1	0	0	1		9	8	5	6	3	4
masiRNA_u_1203	CUAAAGCUAGUAUAGAAGUCACGU	Chr5	13751874	13751897	-		intergenic		4	13	7	9	2	5		0	0	0	0	0	0		9	2	10	8	1	7
masiRNA_u_1204	CAAAUACCAGACGGACCGAACAAU	Chr5	14731064	14731087	-		repeat		8	21	2	8	3	3		1	1	1	0	0	0		8	4	5	0	3	1
masiRNA_u_1205	CAAGACGAUGAAGCUGACGGUGAU	Chr5	15076980	15077003	-		gene		17	27	3	7	2	2		1	0	0	0	0	0		12	16	2	6	3	4
masiRNA_u_1206	CAAAAUAGAACAGACUCAUGCUAG	Chr5	16013829	16013852	-		intergenic		29	62	9	13	4	5		0	0	0	0	0	0		45	33	15	27	2	10
masiRNA_u_1207	CUUGUGGAUUUUAUUUAUGAACGU	Chr5	17439168	17439191	-		repeat		11	17	6	7	1	2		0	1	0	0	0	0		7	15	8	7	1	5
masiRNA_u_1208	CAAACGUUAGACAUGAAAAUCAAG	Chr5	18617797	18617820	-		repeat		2	5	4	8	0	2		0	0	0	0	0	0		2	6	2	3	0	7
masiRNA_u_1209	CUAGGAUCGUAUGUGAUGUAUCAU	Chr5	19113973	19113996	-		repeat		3	14	6	8	2	4		0	1	0	0	0	0		11	1	6	5	5	7
masiRNA_u_1210	CGACUAACUUUUGAUGAAAAAUAU	Chr5	19737976	19737999	-		repeat		2	9	3	10	7	2		0	0	0	0	0	0		7	9	3	2	2	5
masiRNA_u_1211	CUUCAAACCAAAUAGACACUAAAC	Chr5	22278136	22278159	-		repeat		3	6	6	6	1	1		0	0	0	0	0	0		10	8	2	6	1	7
masiRNA_u_1212	CCAACCUUGUAUGAUAUGAACGAU	Chr5	25355901	25355924	-		intergenic		0	0	4	8	1	7		0	0	0	0	0	0		0	1	4	2	2	8
masiRNA_u_1213	CUUCUGUUGCCUUAACCACUCAAU	Chr5	463356	463379	-		intergenic		3	12	4	3	0	1		0	0	0	0	0	1		3	4	10	2	3	0
masiRNA_u_1214	CUAGGACAAUGAAUCUGGACAUGU	Chr5	2348999	2349022	-		repeat		3	11	3	5	3	4		0	0	0	0	0	0		8	4	4	2	2	4
masiRNA_u_1215	CUAUGGAUCUAUGGAAAAAAGAAU	Chr5	2819360	2819383	-		intergenic		5	5	6	1	1	5		0	0	0	0	0	0		2	4	5	1	2	2
masiRNA_u_1216	CGUCUCUUUCUAGUCACUGCAGAG	Chr5	3661380	3661403	-		gene		4	7	4	2	3	4		0	0	0	0	0	0		9	11	9	3	2	2
masiRNA_u_1217	CAAAAACCAAGGGAAAUCAAAGAU	Chr5	3685350	3685373	-		gene		6	12	0	1	0	0		0	0	0	0	0	0		7	1	4	1	0	5
masiRNA_u_1218	CUAAGGAAAAUAAAGUUGGUAGAG	Chr5	5996246	5996269	-		intergenic		3	8	3	2	2	3		0	0	0	0	0	0		2	1	0	1	0	0
masiRNA_u_1219	CAGGACAGCUAAAAUCAAAGAAAU	Chr5	6876753	6876776	-		intergenic		4	33	1	4	3	1		0	0	0	0	0	0		15	6	6	5	2	5
masiRNA_u_1220	CUAGCUUUGGAAGAUCUGUUGUAC	Chr5	7537413	7537436	-		gene		11	13	1	2	1	0		0	0	0	0	0	0		3	5	3	0	2	0
masiRNA_u_1221	CUGCACAAAAUUGAUCAAGACGAG	Chr5	8363950	8363973	-		gene		18	27	6	3	3	4		0	0	0	0	0	0		21	9	7	6	2	4
masiRNA_u_1222	CAACGACGUGAUCCUGAUAGAGAG	Chr5	8945968	8945991	-		intergenic		7	4	2	0	3	1		0	0	0	0	0	0		3	0	1	2	1	0
masiRNA_u_1223	CUACAUACCAGUGACUGUAAUGAU	Chr5	10890536	10890559	-		intergenic		1	9	1	4	1	3		0	0	0	0	0	0		4	1	5	8	3	3
masiRNA_u_1224	CAUCUUUGAUCGGUCCGCUAGAUU	Chr5	13630207	13630230	-		repeat		8	7	1	3	4	1		0	1	0	0	0	1		9	3	3	3	3	3
masiRNA_u_1225	CCAUCUUUGAUCGGUCCGCUAGAU	Chr5	13630208	13630231	-		repeat		6	7	4	3	2	2		0	0	0	0	0	0		5	0	3	1	1	1
masiRNA_u_1226	CUAUCUUUACACUAUCGUCGUCUC	Chr5	13752164	13752187	-		repeat		11	12	6	0	0	1		0	1	0	0	0	0		7	9	3	1	1	0
masiRNA_u_1227	CUAAUCCAAGGGAACGUGUGUGAU	Chr5	14464980	14465003	-		repeat		4	6	0	0	0	1		0	0	0	0	0	0		2	1	1	0	0	1
masiRNA_u_1228	CUUCCCCUAUGUCACUAAAAAGUU	Chr5	16441753	16441776	-		repeat		6	4	2	1	0	1		0	0	0	0	0	0		1	0	0	2	0	1
masiRNA_u_1229	CAAAGAAAUGAUGUAAACUCGAGG	Chr5	16676872	16676895	-		intergenic		3	9	4	0	0	1		0	0	0	0	0	0		4	3	3	0	1	4
masiRNA_u_1230	CUUGAACUUUCAACAUCGGACGAA	Chr5	19812053	19812076	-		repeat		3	8	0	2	0	3		0	0	0	0	0	0		4	3	4	1	2	0
masiRNA_u_1231	CAUCCGUAUCUUAGCACUAUCAAU	Chr5	21932291	21932314	-		intergenic		6	7	1	0	0	0		0	0	0	0	0	0		4	0	2	0	2	1
masiRNA_u_1232	CAUACGGACUCGGAAUCAGGCAAA	Chr5	24617932	24617955	-		repeat		4	6	2	2	1	5		0	0	1	0	0	0		10	10	6	2	7	0
masiRNA_u_1233	CAAACGGACGAAAUAUGUGGCAUG	Chr5	24964290	24964313	-		repeat		7	6	4	3	3	4		0	0	0	0	0	0		7	7	6	4	4	3
masiRNA_u_1234	CUACCAUACUGCCAUAGGACAAAG	Chr5	28107274	28107297	-		repeat		3	8	3	2	2	2		0	0	0	0	0	0		2	3	4	1	3	2
masiRNA_u_1235	CUAUAAUAAAGAGACCUCUGUUGC	Chr6	524723	524746	-		repeat		23	17	12	9	8	8		0	0	0	0	0	0		26	14	14	4	2	6
masiRNA_u_1236	CAGAGAUUUUCCGACUAGCUCCAU	Chr6	1659684	1659707	-		repeat		10	9	8	3	6	6		0	0	0	0	0	0		17	18	6	2	2	0
masiRNA_u_1237	CAAAAGAUGGUGGAGUCUAGUCGU	Chr6	1665753	1665776	-		24-PHAS		0	0	3	1	4	8		0	0	0	0	0	0		0	0	0	0	0	0
masiRNA_u_1238	CUAAGAUAAUGAAUCUGGACAGAG	Chr6	1956379	1956402	-		repeat		2	8	2	0	2	13		0	0	0	0	0	0		8	9	0	5	4	5
masiRNA_u_1239	CAUUCACAUAUCGAAGAGUAGAUC	Chr6	2132062	2132085	-		repeat		5	11	3	16	1	16		0	0	0	0	0	0		27	19	14	13	5	5
masiRNA_u_1240	CGAGACUAUUAACCGUUUAGACGU	Chr6	3975015	3975038	-		repeat		3	3	6	4	3	8		0	0	0	0	0	0		5	2	1	5	0	2
masiRNA_u_1241	CUUCGAAUCUUAAUACUAUGAAAU	Chr6	4422128	4422151	-		repeat		1	8	5	14	4	16		0	0	0	0	0	0		7	7	10	7	6	9
masiRNA_u_1242	CUUAGAUCUAUAAACUUGUAAAAU	Chr6	4458700	4458723	-		intergenic		1	4	3	2	7	10		0	0	0	0	0	0		1	2	0	3	1	5
masiRNA_u_1243	CAAGACGUAAUGUGUGUAUGACAG	Chr6	5318047	5318070	-		repeat		35	48	26	23	29	29		0	3	1	0	1	0		38	42	27	17	5	22
masiRNA_u_1244	CUUCCUCUAACGUAACGACUUGAC	Chr6	5488032	5488055	-		intergenic		5	17	5	4	4	6		1	0	0	1	0	0		12	16	6	4	4	5
masiRNA_u_1245	CUAUACAUAGUAAAAUAUUCUGAG	Chr6	6454614	6454637	-		repeat		2	4	1	4	2	8		0	0	0	0	0	0		4	9	3	4	3	2
masiRNA_u_1246	CAGACUCUAAAACAAUAUAUGUAU	Chr6	6834073	6834096	-		repeat		1	9	2	5	1	9		0	0	1	0	0	0		7	6	2	2	1	2
masiRNA_u_1247	CUAGAUCACCAUUGAUAGAACGAG	Chr6	6989602	6989625	-		intergenic		4	25	8	15	7	26		0	1	0	0	0	0		33	26	27	17	13	12
masiRNA_u_1248	CUAGACUUUUGUGUUCCGAUGACC	Chr6	7355724	7355747	-		intergenic		8	6	5	1	5	5		0	0	0	0	0	0		3	7	0	2	0	0
masiRNA_u_1249	CUAAUAUUAUGAAUGUGGACUAAG	Chr6	8950079	8950102	-		repeat		5	14	3	7	5	13		0	0	0	0	0	0		6	2	6	3	2	6
masiRNA_u_1250	CAACGACGUCAAAUAUUUAGGGAU	Chr6	10911031	10911054	-		repeat		47	83	44	42	35	58		0	0	0	0	0	0		57	50	51	27	39	38
masiRNA_u_1251	CAAGUACGUGUCGGCUAUAAAGAU	Chr6	11236542	11236565	-		intergenic		7	8	5	9	7	10		0	0	0	0	0	0		8	6	2	5	6	4
masiRNA_u_1252	CUAGGGAUGUAUGGUCAUGUGCAG	Chr6	11303170	11303193	-		intergenic		5	0	7	1	5	8		0	0	0	0	0	0		0	4	3	2	1	0
masiRNA_u_1253	CUAAAUUAAAUGAAAAUCGACGGU	Chr6	13014635	13014658	-		repeat		6	17	5	6	6	5		0	0	0	1	0	0		7	8	3	3	2	6
masiRNA_u_1254	CAAACUAAGGUAGAGAGAGAACAC	Chr6	13427082	13427105	-		intergenic		2	3	3	7	12	7		0	0	0	0	0	0		5	2	4	1	10	7
masiRNA_u_1255	CAACGACAAAGACAAAGUGAGCAC	Chr6	13427318	13427341	-		intergenic		2	3	6	1	7	16		0	0	1	0	0	0		9	6	5	3	14	9
masiRNA_u_1256	CUUAUUAAUGUAAAACAGGACCAU	Chr6	13429808	13429831	-		gene		4	14	6	15	9	12		0	0	0	0	0	0		14	13	29	9	10	15
masiRNA_u_1257	CUUCAUGAAAUCGAGUACUCUGUC	Chr6	13430126	13430149	-		gene		5	1	4	3	3	13		0	0	0	0	0	0		2	3	2	8	0	9
masiRNA_u_1258	CUAGAAAACACAGUAGGGGUAGAA	Chr6	13430404	13430427	-		gene		1	0	2	3	4	7		0	0	0	0	0	0		4	5	5	2	8	5
masiRNA_u_1259	CAAGACAAGACGCCGGAUAUCGAC	Chr6	14953698	14953721	-		repeat		26	49	10	19	10	30		0	1	0	0	0	0		44	40	19	13	9	14
masiRNA_u_1260	CUUCUAUCUGUGACGGGCUCUAAU	Chr6	16437423	16437446	-		repeat		13	29	8	9	7	9		1	0	0	0	0	0		17	22	10	6	7	3
masiRNA_u_1261	CGAGGAUCUACGUAGUACGACAUC	Chr6	17238381	17238404	-		repeat		5	18	9	4	10	16		0	0	1	0	0	0		15	11	8	5	7	6
masiRNA_u_1262	CAAACUACUGUUCUGCUCCGGCGU	Chr6	21225925	21225948	-		intergenic		0	3	2	2	6	4		0	0	0	0	0	0		0	0	3	4	4	0
masiRNA_u_1263	CAAAGCUGAUGGAAUUUUGGAAUG	Chr6	25263248	25263271	-		24-PHAS		1	0	17	16	21	53		0	0	0	0	3	6		0	0	0	0	0	2
masiRNA_u_1264	CUAUUGAGUGAGCCAACUAAAAAC	Chr6	25366433	25366456	-		24-PHAS		0	0	1	5	2	11		0	0	1	0	0	1		0	0	0	0	0	0
masiRNA_u_1265	CUAGAACAAAAAAAAUGAUGUGGC	Chr6	26380579	26380602	-		repeat		5	10	6	6	3	7		0	0	0	0	0	0		7	7	4	2	1	1
masiRNA_u_1266	CAAGUGAUCUUCUAGUAAACCAAU	Chr6	27804527	27804550	-		intergenic		0	0	4	4	2	10		0	0	0	0	0	0		3	1	0	3	3	5
masiRNA_u_1267	CUAUCUAAUGUAGCGGUGCUCAAA	Chr6	28909116	28909139	-		intergenic		25	40	24	26	18	43		0	1	0	0	0	0		23	45	41	20	13	10
masiRNA_u_1268	CUAUUUAUUGUAGCGGUGCUCAAA	Chr6	28909150	28909173	-		repeat		10	11	9	11	3	8		0	0	0	0	0	0		3	9	14	16	3	1
masiRNA_u_1269	CUUCUACUGUAAUAAUCUUCUGGA	Chr6	29377182	29377205	-		intergenic		0	0	2	0	4	12		0	0	0	0	0	0		2	1	0	2	2	2
masiRNA_u_1270	CAAAGCCAGUGCGUGGAAACUCUC	Chr6	29377854	29377877	-		repeat		0	5	1	5	3	8		0	0	0	0	0	0		6	0	2	7	5	3
masiRNA_u_1271	CAGAUCCUUUUGGUGUAGCUCGGU	Chr6	29377935	29377958	-		repeat		1	10	2	3	2	11		0	0	0	0	1	1		5	10	10	2	4	2
masiRNA_u_1272	CAUGAUCGUGCAGGCUGGCGUGCA	Chr6	29379006	29379029	-		intergenic		3	5	7	5	6	11		0	0	0	0	0	0		3	6	5	1	10	4
masiRNA_u_1273	CGACUAUGAUCUCGCCGAACACCG	Chr6	29379254	29379277	-		intergenic		32	27	38	17	47	31		0	0	0	2	0	1		14	14	19	8	32	20
masiRNA_u_1274	CAUAAGAGGAUACUGUGUCGUGGU	Chr6	29455843	29455866	-		intergenic		63	144	21	22	5	9		8	25	3	2	1	3		53	47	22	9	2	3
masiRNA_u_1275	CUAUAUUAUCUAGAGACUAGCACC	Chr6	5049912	5049935	-		intergenic		4	11	5	7	3	6		0	0	0	0	0	0		12	8	7	3	3	4
masiRNA_u_1276	CACAACCUGUUGAACUCAUCUAAG	Chr6	6193541	6193564	-		intergenic		14	40	7	11	3	6		0	0	0	0	0	0		39	14	9	13	6	6
masiRNA_u_1277	CUAAUACAAUAAAUCUGAACAACC	Chr6	6417542	6417565	-		repeat		1	11	3	7	3	6		0	0	0	0	0	0		10	5	6	8	3	1
masiRNA_u_1278	CAAAUCAUCUAUAGCUAACUUAAU	Chr6	7206853	7206876	-		repeat		3	7	9	5	1	7		0	0	0	0	0	0		6	3	10	7	3	7
masiRNA_u_1279	CUGCUCUAGCCUCCCUGUAACAAU	Chr6	7537508	7537531	-		intergenic		4	10	4	8	4	5		0	0	0	0	0	0		3	1	5	2	10	4
masiRNA_u_1280	CAAACUAGAUGUGUACUCCAACAG	Chr6	7551979	7552002	-		repeat		2	0	6	5	5	2		0	0	0	0	0	0		3	5	1	0	1	2
masiRNA_u_1281	CAAUUAAAAAUCGUGUGGCUCUUU	Chr6	21362670	21362693	-		repeat		16	23	2	10	5	4		0	0	0	0	0	0		10	3	3	3	1	1
masiRNA_u_1282	CUGUUUCCUGGGACUGGUAUCGAU	Chr6	524668	524691	-		repeat		6	8	4	5	1	3		1	0	1	0	0	0		8	0	3	1	1	1
masiRNA_u_1283	CAAUCUUCAGAUUUGCCGGCCCAG	Chr6	665595	665618	-		repeat		4	6	1	1	1	2		0	0	0	0	0	0		3	6	0	1	0	0
masiRNA_u_1284	CAAACACACGAAGGCCUGAGAGAU	Chr6	2752698	2752721	-		repeat		8	19	2	7	5	3		0	0	0	0	0	0		4	6	5	2	1	1
masiRNA_u_1285	CAUAGAGUAUAUGUAGGAGUACAU	Chr6	2838097	2838120	-		repeat		3	12	1	4	3	5		0	0	0	0	0	0		6	4	2	5	3	5
masiRNA_u_1286	CAAACGGCUGUCACAAGUGAGGGU	Chr6	4287807	4287830	-		repeat		10	4	1	2	1	2		1	2	0	0	0	0		3	2	3	1	0	0
masiRNA_u_1287	CUAUCAUAUCUGUAGCCCGCUGCU	Chr6	5636262	5636285	-		repeat		2	10	2	4	2	3		0	0	0	0	0	0		8	4	3	0	1	5
masiRNA_u_1288	CAAAACGAGAGAUAGUGAUGGAGC	Chr6	6374925	6374948	-		gene		6	4	1	0	0	0		0	0	0	0	0	0		3	0	0	0	1	0
masiRNA_u_1289	CAUAACUAUGCAAACCGGACGAAU	Chr6	6713650	6713673	-		repeat		1	12	2	4	0	3		0	0	0	0	0	0		3	1	2	1	0	0
masiRNA_u_1290	CAAUAAAUCAAUGCGUGUGAACAG	Chr6	7047017	7047040	-		intergenic		4	6	1	7	4	2		0	0	0	0	0	0		12	8	2	3	2	2
masiRNA_u_1291	CAAUUAUUUUGGGACGGAGGUAGU	Chr6	11189673	11189696	-		repeat		4	6	1	4	3	0		0	0	0	0	0	0		4	6	1	0	1	1
masiRNA_u_1292	CAAAUAGAAUUUGAGAGGAAUAGA	Chr6	11481476	11481499	-		intergenic		6	6	3	4	1	2		0	1	0	0	0	0		7	3	4	7	1	2
masiRNA_u_1293	CUUCUAGAAUCAGCGAUCUGUAAU	Chr6	11481897	11481920	-		intergenic		6	13	1	3	1	4		0	0	0	0	0	0		8	6	9	7	1	7
masiRNA_u_1294	CUAUACGCGUGCUUCUAGAAUCAG	Chr6	11481908	11481931	-		intergenic		7	6	1	1	2	1		0	0	0	0	0	0		6	1	3	0	4	1
masiRNA_u_1295	CAAAUGACUGCACCUGAUCCCAAU	Chr6	11669363	11669386	-		intergenic		1	9	1	0	0	2		0	0	0	0	0	0		6	2	2	1	1	0
masiRNA_u_1296	CUAUCUCAAUCGGGCAAACGGCGU	Chr6	13646987	13647010	-		repeat		8	4	1	0	1	0		0	0	0	0	0	0		1	0	2	2	0	0
masiRNA_u_1297	CUUCCGCUUGUUAAACUCUGAAUU	Chr6	14221320	14221343	-		repeat		6	8	6	3	1	2		0	0	0	0	0	0		10	11	2	1	3	4
masiRNA_u_1298	CAGGACUACUCUCUCGCUGUAAAG	Chr6	14789999	14790022	-		intergenic		6	5	0	0	2	0		0	0	0	0	0	0		6	1	1	1	0	1
masiRNA_u_1299	CGAGUGUGUUAUUGAUUGUAUGAU	Chr6	14910742	14910765	-		repeat		0	12	2	2	0	3		0	0	0	0	0	0		0	2	1	1	1	1
masiRNA_u_1300	CCAAGACAAGACGCCGGAUAUCGA	Chr6	14953699	14953722	-		repeat		4	6	1	2	0	6		0	0	0	0	0	0		4	2	0	3	3	1
masiRNA_u_1301	CAAGGGAAGAUUGUAAGAGAUAAC	Chr6	17731618	17731641	-		repeat		10	13	5	1	1	4		0	0	0	0	0	0		5	2	1	1	1	2
masiRNA_u_1302	CUAGCUGUGCUCCUAUUUUAAGAU	Chr6	26061912	26061935	-		repeat		7	6	2	2	4	2		0	0	0	0	0	0		5	6	1	2	0	2
masiRNA_u_1303	CUUGUAGAUUUUAUUUGUGACGUU	Chr6	27513146	27513169	-		repeat		11	16	5	3	1	4		0	2	0	1	1	0		4	7	2	2	0	0
masiRNA_u_1304	CAUUUAUAUUGGAACGGAGAUAGU	Chr6	30922320	30922343	-		intergenic		5	5	1	0	0	1		0	0	0	0	0	0		3	2	3	1	0	0
masiRNA_u_1305	CUAAUAAUUGAGACUAUGUGCAGC	Chr7	136381	136404	-		gene		9	18	6	5	3	9		0	1	1	0	0	0		9	7	13	4	2	5
masiRNA_u_1306	CUAUGACUUAUAUUACACACUAAU	Chr7	136755	136778	-		gene		5	32	8	24	7	25		0	0	0	0	0	0		20	20	17	13	6	16
masiRNA_u_1307	CUAUGACUGACAUUGAUGACGAGU	Chr7	137094	137117	-		gene		23	25	20	7	11	9		0	1	0	0	0	0		12	21	6	12	3	8
masiRNA_u_1308	CUGGAACAUCUAGAACUAUGACUG	Chr7	137109	137132	-		gene		20	13	15	5	10	11		0	0	0	0	0	0		10	15	6	5	4	6
masiRNA_u_1309	CACCCGAGGAUCUAGACGAGCGAG	Chr7	138423	138446	-		gene		5	19	5	2	2	8		0	1	0	0	0	0		10	10	8	3	0	2
masiRNA_u_1310	CUUGCACCCGAGGAUCUAGACGAG	Chr7	138427	138450	-		gene		75	54	44	27	28	34		0	1	1	0	0	0		30	55	21	14	17	29
masiRNA_u_1311	CUUCUACUCGUCAUCAUUGUUAGU	Chr7	138731	138754	-		gene		57	48	55	30	33	21		1	0	0	0	0	0		46	33	21	20	8	13
masiRNA_u_1312	CUUCCGACCGAUAACAGUAGAUUC	Chr7	3335267	3335290	-		repeat		11	9	10	4	13	4		0	0	0	0	0	0		6	4	4	3	2	4
masiRNA_u_1313	CAACAGAAACAAAUCGGACGACGU	Chr7	3358587	3358610	-		gene		7	5	4	3	8	2		0	0	0	0	0	0		2	0	2	2	1	1
masiRNA_u_1314	CUAUUAAUAAUUGAGACGAUGUAC	Chr7	4144555	4144578	-		gene		4	3	3	6	4	6		0	0	0	0	0	1		1	6	2	2	2	3
masiRNA_u_1315	CGACCAACUACUACUUUGACAAGU	Chr7	4352302	4352325	-		gene		14	4	27	4	21	16		0	0	0	0	0	0		9	2	10	4	8	14
masiRNA_u_1316	CAAACACAUAACAUCUCUGACAAG	Chr7	4352692	4352715	-		gene		10	5	8	7	20	14		0	0	1	0	0	0		4	6	5	2	11	7
masiRNA_u_1317	CAAUAAUGAAAUGUACUGAGAAAU	Chr7	4374279	4374302	-		intergenic		4	2	7	10	3	12		0	0	0	0	0	0		0	1	7	7	5	5
masiRNA_u_1318	CUAAAGUGUGCUACUGAUAAUAAG	Chr7	4374592	4374615	-		intergenic		2	3	9	11	17	16		0	0	0	0	0	0		4	3	4	8	3	20
masiRNA_u_1319	CAAGUGAAUUCUGGUAUACGUGAG	Chr7	4374712	4374735	-		intergenic		4	11	9	11	8	13		0	0	0	0	0	0		15	4	14	13	12	10
masiRNA_u_1320	CAAGAAAUUAGAACGAUGUGACAG	Chr7	4855850	4855873	-		repeat		7	19	9	11	8	9		0	0	0	0	0	0		21	13	9	4	4	8
masiRNA_u_1321	CUAUAUCUUUCAUUGGAAUCUGAA	Chr7	5846279	5846302	-		24-PHAS		0	0	0	0	5	10		0	0	0	0	0	0		0	0	0	0	0	0
masiRNA_u_1322	CGACUCUAUAUCUUUCAUUGGAAU	Chr7	5846284	5846307	-		24-PHAS		0	1	59	64	91	146		0	0	1	2	8	2		0	0	1	0	1	2
masiRNA_u_1323	CUUUCAAUACUGGACGAAUUACCC	Chr7	8485735	8485758	-		repeat		6	6	9	3	8	6		0	0	0	0	0	0		2	5	6	6	3	2
masiRNA_u_1324	CAAGGAUUCAAACAAGUAGGCUAA	Chr7	8833027	8833050	-		gene		10	21	9	5	4	18		0	0	0	0	0	0		15	10	9	5	8	3
masiRNA_u_1325	CUUCAGGAUGAAGAGACAAGAGAG	Chr7	11363548	11363571	-		intergenic		21	12	8	4	5	10		0	0	0	0	0	0		0	0	0	0	0	0
masiRNA_u_1326	CUACAAGUCUUACACUGAACUCGU	Chr7	13060428	13060451	-		repeat		8	14	7	4	7	8		0	0	0	0	0	0		4	15	5	10	2	4
masiRNA_u_1327	CAGAACUUUUCAGACCUGGACGAC	Chr7	13061005	13061028	-		repeat		7	24	5	7	5	6		0	0	0	0	0	0		29	20	20	13	4	8
masiRNA_u_1328	CUGAACUAUCGCGGUCGACCGAAU	Chr7	15314488	15314511	-		repeat		6	6	5	5	2	9		0	2	0	0	0	0		8	9	6	1	1	3
masiRNA_u_1329	CUAAUUUUUGUUGGGUCUAUGAGU	Chr7	15989434	15989457	-		intergenic		0	4	3	1	4	8		0	0	0	0	0	0		1	0	1	2	1	2
masiRNA_u_1330	CAUCCGCUCUAGAUUUGUAGUAAU	Chr7	17452576	17452599	-		repeat		1	4	1	3	5	10		0	0	0	0	0	0		3	5	2	0	1	0
masiRNA_u_1331	CUAAGGAAAGAUUACUGUUGUGCU	Chr7	18746326	18746349	-		intergenic		6	28	4	9	1	10		0	0	0	0	0	0		16	11	8	5	1	1
masiRNA_u_1332	CGAACUUUGCAUACACGUAUACAA	Chr7	20600921	20600944	-		repeat		0	0	0	0	3	7		0	0	0	0	0	0		0	0	0	1	0	0
masiRNA_u_1333	CUAUACUAUUUAUACCGGACGAAU	Chr7	20655711	20655734	-		intergenic		3	8	1	4	5	6		0	0	0	0	0	0		4	5	4	3	0	2
masiRNA_u_1334	CAAGACCAUAUAGACACCUCCAUC	Chr7	20712016	20712039	-		intergenic		300	324	109	71	80	102		1	2	4	4	1	0		208	140	113	85	60	62
masiRNA_u_1335	UUGAUACAAAUGACGGAGACAAUG	Chr7	21302842	21302865	-		repeat		19	18	9	2	7	3		1	0	1	0	0	0		12	6	13	6	4	4
masiRNA_u_1336	CUAAAACCGAAGGAUGGACUCUAG	Chr7	21394017	21394040	-		repeat		2	7	3	4	4	8		0	0	0	0	0	0		11	6	7	2	8	2
masiRNA_u_1337	CAAAUCAUUUCUGAUCGUUGGAUC	Chr7	24309837	24309860	-		repeat		6	0	3	3	3	7		1	0	0	0	0	0		5	11	4	5	2	2
masiRNA_u_1338	CUAUAAACACAUAUAAAGACUGAG	Chr7	24339270	24339293	-		repeat		4	10	2	4	6	6		0	0	0	0	0	0		5	9	8	8	2	6
masiRNA_u_1339	CUUCCGACAUCUGAUUAAACAUUC	Chr7	24638165	24638188	-		repeat		24	23	34	8	20	11		0	0	0	0	0	0		16	17	12	6	2	7
masiRNA_u_1340	CAGAUUUGUAGCCAGCUGCAGCAC	Chr7	25391102	25391125	-		repeat		10	4	6	2	5	7		0	2	0	0	0	0		6	14	4	2	4	1
masiRNA_u_1341	CCAAAACUGAACGAUCUUAAGAAC	Chr7	26396834	26396857	-		repeat		2	4	2	6	6	9		0	0	0	0	0	0		6	5	4	5	1	3
masiRNA_u_1342	CGAUAUGACAAUAAAUCUGGACAU	Chr7	27014042	27014065	-		repeat		3	11	1	4	3	7		0	1	0	0	0	1		16	9	7	5	3	8
masiRNA_u_1343	CAACUUAAGACUGUUCAGAUUCAU	Chr7	28159233	28159256	-		intergenic		3	8	0	6	2	9		0	0	0	0	0	0		3	1	3	2	2	4
masiRNA_u_1344	CAGCGUCCAAUUACUUUUCUCGAU	Chr7	136548	136571	-		gene		5	11	7	5	2	4		0	1	0	1	0	0		8	4	8	11	2	2
masiRNA_u_1345	CAUGUGCUACGAAUCUGGAUAUAC	Chr7	3822380	3822403	-		repeat		20	12	16	3	2	3		0	1	0	0	0	1		5	8	2	3	2	3
masiRNA_u_1346	CUAGACAAGAAAUCAAGAAUGCAU	Chr7	4374879	4374902	-		intergenic		0	3	3	7	2	5		0	0	0	0	1	0		1	3	2	2	2	12
masiRNA_u_1347	CUUAAGAACGAUGAGACAAAAGAG	Chr7	5536221	5536244	-		repeat		4	3	4	11	2	3		0	0	1	0	0	0		8	1	3	2	2	3
masiRNA_u_1348	CAGCGAAUUAACGAACGAGACUAU	Chr7	9334578	9334601	-		intergenic		8	9	10	5	4	4		0	0	0	0	1	0		5	4	1	4	0	3
masiRNA_u_1349	CUUUUUGUUAAAGACGUUUUAGAA	Chr7	9363490	9363513	-		intergenic		1	1	3	7	0	0		0	0	0	0	0	0		3	4	1	1	0	3
masiRNA_u_1350	CCAACGAACGUACUCAGUAAAAAG	Chr7	13062586	13062609	-		repeat		2	4	7	3	1	1		0	0	0	0	0	0		10	1	3	2	3	4
masiRNA_u_1351	CUAAGAGAAAUACUGUGAUACAUU	Chr7	20712448	20712471	-		intergenic		2	2	3	7	1	0		0	0	0	0	0	0		1	2	0	2	1	1
masiRNA_u_1352	AGAGUAACGGUAGUUCAUUGAGAG	Chr7	21307075	21307098	-		repeat		8	16	8	13	6	3		0	0	0	1	0	0		7	9	5	3	3	2
masiRNA_u_1353	CUAUAAAAAAGCGAGCUGGAACAU	Chr7	137124	137147	-		gene		2	8	0	1	0	0		0	0	0	0	0	0		5	2	1	2	0	1
masiRNA_u_1354	UGAGGAAUGUCGGCACGACGAGAG	Chr7	137705	137728	-		gene		4	8	1	0	1	2		0	0	0	0	0	0		2	4	1	4	0	2
masiRNA_u_1355	CGUCUAUACUCUGGCAACAUCAAG	Chr7	138090	138113	-		gene		4	15	2	6	4	4		0	0	0	0	0	0		9	3	10	7	1	5
masiRNA_u_1356	CUAAUUCAACGAAUCUGGACAGGU	Chr7	840154	840177	-		gene		4	10	5	3	3	1		0	0	0	0	0	0		3	2	8	2	1	4
masiRNA_u_1357	CUAAUACUACGAAUCUGGAUACGU	Chr7	1589446	1589469	-		repeat		9	3	1	1	2	2		0	0	0	0	0	0		1	3	3	0	0	1
masiRNA_u_1358	CAGGAAAAUAUUUGGUGUAGUAGU	Chr7	2726749	2726772	-		repeat		6	4	3	2	2	0		0	0	0	0	0	0		4	6	2	2	0	1
masiRNA_u_1359	CAGACUAUAGCCGACUAUAAACAU	Chr7	3347759	3347782	-		repeat		3	9	6	2	6	3		0	0	0	0	0	0		4	5	3	3	0	1
masiRNA_u_1360	CUAUAUAAGGAAUGUGUUGAUGAU	Chr7	3406764	3406787	-		intergenic		2	9	0	2	0	0		0	0	0	0	0	0		3	2	0	3	1	0
masiRNA_u_1361	CUGCGAAGUGUAGAAGAGACGUGC	Chr7	4125018	4125041	-		intergenic		7	6	0	0	0	0		0	1	0	0	0	0		1	3	0	0	0	0
masiRNA_u_1362	CUAUACAAAUUAGGACGGAGCCAG	Chr7	5711533	5711556	-		repeat		9	5	4	3	3	4		0	0	0	0	0	0		3	3	2	0	2	1
masiRNA_u_1363	CUAACUUUCGUUGACCCAUGUGCU	Chr7	7950455	7950478	-		intergenic		2	11	3	4	3	4		0	0	0	0	0	0		9	3	6	3	3	2
masiRNA_u_1364	CUAGAUCGCGUCGUGGGCUACAAG	Chr7	8681244	8681267	-		repeat		7	13	5	2	1	3		0	0	0	0	0	0		19	9	4	0	5	3
masiRNA_u_1365	CUAUUAGAUUGGCUAUAAAUGAAU	Chr7	11586276	11586299	-		repeat		1	11	2	6	1	6		0	0	0	0	0	0		4	8	10	8	4	6
masiRNA_u_1366	CUACCUUAAUCCGUGCGUCCAAGU	Chr7	13059525	13059548	-		repeat		7	4	4	0	1	5		0	0	0	0	0	0		2	0	1	0	0	2
masiRNA_u_1367	CAGGUCCGUUGGAUUGGACGACGU	Chr7	13059577	13059600	-		repeat		11	11	4	2	1	0		0	1	0	0	0	0		4	10	1	0	0	1
masiRNA_u_1368	CUAAGGAGCUCUCUGGACUAAAAG	Chr7	13062829	13062852	-		repeat		10	4	2	2	4	4		0	0	1	0	0	0		10	6	8	2	1	4
masiRNA_u_1369	CAACGAGAUUGCGAAUGGGCGAAC	Chr7	18306390	18306413	-		repeat		2	8	3	0	0	4		0	1	0	0	0	0		0	0	0	0	0	0
masiRNA_u_1370	UGCUCAGACUCUGCCCUUCUUGUG	Chr7	18746212	18746235	-		intergenic		11	9	0	0	0	0		1	4	0	0	0	0		12	3	0	0	0	0
masiRNA_u_1371	CAAGAUCUUGUAGUAGUACGUGCG	Chr7	19433647	19433670	-		intergenic		5	9	4	3	4	4		0	0	0	0	0	0		4	2	2	0	0	0
masiRNA_u_1372	CAAGAAGUGUGUGCGUAGACUACC	Chr7	21029361	21029384	-		repeat		13	8	5	0	3	4		1	0	0	0	0	0		5	7	1	2	1	0
masiRNA_u_1373	CAAGUUAGGAAGGACGAUGAUGAU	Chr7	21303252	21303275	-		repeat		6	8	2	5	3	1		0	0	1	0	0	0		1	5	2	3	2	5
masiRNA_u_1374	CGAAUUUGGGAGGACGCUUGCAAG	Chr7	21303622	21303645	-		repeat		11	22	4	4	2	3		0	0	0	1	0	0		16	8	7	7	5	4
masiRNA_u_1375	CUUGCCAUCUAUCUCCCUACCAGU	Chr7	21305092	21305115	-		repeat		5	5	3	0	1	0		0	0	0	0	0	0		2	1	1	0	2	2
masiRNA_u_1376	CUUUCAAUUUUGGCGUGGAACUAA	Chr7	22383107	22383130	-		repeat		2	8	1	1	1	2		0	1	0	0	0	0		4	2	1	3	1	0
masiRNA_u_1377	CUAUUAAAUAGCCGACUGGAGAAG	Chr7	24114988	24115011	-		intergenic		6	8	1	0	1	6		0	0	0	0	0	0		5	3	1	2	2	2
masiRNA_u_1378	CAUUGACGUGUAGCCGGGACCUAU	Chr7	24263728	24263751	-		intergenic		4	6	0	1	2	1		0	0	0	0	0	0		1	1	1	0	0	2
masiRNA_u_1379	CUAAUAUAAUGAAUCUGGACAGGC	Chr7	24993653	24993676	-		repeat		6	6	4	1	1	6		0	0	0	0	0	0		6	7	1	3	4	5
masiRNA_u_1380	CAUCGGGUGUAUUAUAUAGCGUGU	Chr7	25535754	25535777	-		repeat		7	3	5	2	2	1		0	0	0	0	0	0		1	6	2	1	0	0
masiRNA_u_1381	CUCUUCGUCCGAAAAAAACUCAAG	Chr7	26885021	26885044	-		repeat		10	3	7	1	4	3		0	0	0	0	0	0		7	3	1	4	4	1
masiRNA_u_1382	CAGCCCAAAGAGGACGGAGACGAA	Chr7	28073531	28073554	-		repeat		8	9	2	2	2	7		0	0	0	0	0	0		4	18	4	1	2	2
masiRNA_u_1383	CUUAGGUGUAAAGAGGUAUCGAAU	Chr7	29070555	29070578	-		repeat		4	8	1	1	0	3		0	0	0	0	0	0		4	1	1	0	0	2
masiRNA_u_1384	CUAGUACAACGAAUCUGAACAAUC	Chr7	29325085	29325108	-		repeat		3	7	4	3	6	1		0	0	0	0	0	0		5	5	3	7	5	3
masiRNA_u_1385	CUACGUAGCUAAUUUGAAUCAAUC	Chr8	2319823	2319846	-		repeat		20	25	20	15	15	17		1	0	0	0	0	0		24	20	24	7	7	11
masiRNA_u_1386	CUAGUACAACGAAUCUGAACAAAG	Chr8	2500701	2500724	-		repeat		2	2	7	7	5	6		0	0	0	0	0	0		12	10	7	6	1	7
masiRNA_u_1387	CAUCUGACUGUCGACGGGUACAUC	Chr8	2955156	2955179	-		repeat		29	16	17	15	23	13		0	0	0	0	0	0		18	19	8	5	12	10
masiRNA_u_1388	CUUCUCUCUGUAUUGAAAAUAUGC	Chr8	3941052	3941075	-		intergenic		10	6	5	2	4	7		0	0	0	0	0	0		3	4	4	2	4	2
masiRNA_u_1389	CAUCAGACGUUUGAUCGGACACGA	Chr8	4351651	4351674	-		repeat		7	7	5	6	7	14		0	0	0	0	0	0		21	22	10	6	9	9
masiRNA_u_1390	CUGAUACUUGUCGAACCGGCACAU	Chr8	5778815	5778838	-		intergenic		0	2	1	3	1	10		0	0	0	0	0	0		1	3	1	3	1	5
masiRNA_u_1391	CAAACCGUUCUUGACUGAAACAAU	Chr8	7768031	7768054	-		gene		1	11	12	30	23	36		0	0	0	0	0	0		19	8	27	24	17	24
masiRNA_u_1392	CAAAUUGUUGUAUCUGUGUCCACC	Chr8	7768096	7768119	-		gene		1	2	3	1	8	5		0	0	0	0	0	0		2	1	6	1	4	5
masiRNA_u_1393	CGACGGUACGUAUUUUGCAAACAG	Chr8	8229865	8229888	-		repeat		33	72	25	30	29	54		0	1	1	0	0	0		71	32	52	25	18	25
masiRNA_u_1394	CUUCGUCAUGAUGGGCUGUGCGAG	Chr8	10497509	10497532	-		repeat		3	8	12	12	18	15		0	0	0	0	0	0		3	5	7	6	12	17
masiRNA_u_1395	CAAAGACUAUGGUCCAUGGACAAG	Chr8	10497647	10497670	-		repeat		0	3	3	3	4	7		0	0	0	0	0	0		0	1	4	2	9	8
masiRNA_u_1396	CAACGUAAGUGUGAGUAAGGUGAU	Chr8	14926869	14926892	-		intergenic		13	11	10	12	5	15		0	0	0	0	0	0		28	16	14	13	13	10
masiRNA_u_1397	CAACUCUGAAGACGUGCUCCCGAU	Chr8	15456907	15456930	-		gene		11	5	18	10	17	25		0	0	1	0	0	0		3	5	4	8	7	9
masiRNA_u_1398	CUCAACUCUGAAGACGUGCUCCCG	Chr8	15456909	15456932	-		gene		11	3	4	0	13	6		0	0	0	1	0	0		1	2	3	1	2	2
masiRNA_u_1399	CUUGGACUCAACUCUGAAGACGUG	Chr8	15456915	15456938	-		gene		7	2	11	5	8	10		0	0	0	2	0	0		1	4	6	2	2	3
masiRNA_u_1400	CCUUGGACUCAACUCUGAAGACGU	Chr8	15456916	15456939	-		gene		5	2	9	5	14	3		0	0	0	0	0	0		0	1	3	4	3	4
masiRNA_u_1401	CUCGGGAAGAAUAAGAAAGUAAAG	Chr8	15457269	15457292	-		gene		2	3	5	1	7	6		0	0	0	0	0	0		2	0	0	4	4	5
masiRNA_u_1402	CAGUGAUCUGGUGUAGUUGUCGAU	Chr8	15457645	15457668	-		gene		0	2	1	4	4	8		0	0	0	0	0	0		1	2	2	1	1	4
masiRNA_u_1403	CUUGGACUUAACUAUGAAGACGUG	Chr8	15457998	15458021	-		gene		16	4	19	13	26	16		0	0	0	0	0	0		6	6	2	3	3	9
masiRNA_u_1404	CAAUCUUGAGCUGUGGCGGCUGGA	Chr8	15458068	15458091	-		gene		1	3	1	8	4	7		0	0	0	0	0	0		6	2	4	1	6	5
masiRNA_u_1405	CGAUUUAUAUCGGUGAUGACACGG	Chr8	15458578	15458601	-		gene		2	1	6	3	3	9		0	0	0	0	0	1		6	5	7	4	7	7
masiRNA_u_1406	CCUUGGACUCCACUCUGAAGACGU	Chr8	15458607	15458630	-		gene		5	2	2	1	7	5		0	1	0	0	1	0		1	3	1	1	1	5
masiRNA_u_1407	CAUUCAAAGAAUUCCUGGAACAAG	Chr8	15458659	15458682	-		gene		1	3	3	1	3	7		0	0	0	0	0	0		1	1	2	6	9	8
masiRNA_u_1408	CUUGAAUAUGUGGUCGACGGUUAG	Chr8	15459457	15459480	-		repeat		6	11	3	4	13	20		0	0	0	0	0	0		7	3	6	7	13	6
masiRNA_u_1409	CGACAACCGUAUUUGUAGAGUAUG	Chr8	15459614	15459637	-		gene		0	0	7	3	5	13		0	0	0	0	0	0		3	6	12	4	6	8
masiRNA_u_1410	CAAGAAGGUGAGUUAGAGCUCGAG	Chr8	15459814	15459837	-		gene		1	2	2	9	4	9		0	0	0	0	0	0		0	3	3	0	2	4
masiRNA_u_1411	CUGGACAAGAUAUAUUCAUAGUAG	Chr8	15460704	15460727	-		gene		0	4	3	5	5	19		0	0	0	1	0	0		4	4	8	6	6	6
masiRNA_u_1412	CUUUUAGAUUCCCAGCGUGACGAU	Chr8	15460879	15460902	-		gene		0	1	4	4	4	8		0	0	0	0	0	0		1	1	3	2	1	4
masiRNA_u_1413	CCAGAACGAUGGGACGGAUGAGAG	Chr8	15461565	15461588	-		repeat		2	7	2	3	7	14		0	1	0	1	1	1		6	0	5	3	10	9
masiRNA_u_1414	CACCAGAACGAUGGGACGGAUGAG	Chr8	15461567	15461590	-		repeat		5	1	5	5	11	19		0	0	0	0	0	1		5	4	4	1	23	15
masiRNA_u_1415	CUAACUGAUCUACUUGAACCUGAG	Chr8	16977377	16977400	-		intergenic		0	1	1	2	5	5		0	0	0	0	0	0		0	0	4	3	4	4
masiRNA_u_1416	CUUCCCGACUUAUAUGUAGACUAU	Chr8	18292471	18292494	-		repeat		30	27	14	7	16	8		0	0	0	0	0	0		20	23	14	11	1	9
masiRNA_u_1417	CUUUAAUCAUUUGGACUGUGAUAG	Chr8	19821484	19821507	-		intergenic		13	14	11	12	11	17		0	2	0	0	0	0		14	16	14	12	5	3
masiRNA_u_1418	CGGUCUUCAAAAUAUAACUUUGAU	Chr8	20073078	20073101	-		repeat		1	2	1	9	3	7		0	0	1	0	0	0		2	6	4	4	1	0
masiRNA_u_1419	CAACUGAAGGACGUACUGACGAAG	Chr8	20984593	20984616	-		repeat		0	1	3	2	11	6		0	0	0	0	0	0		2	2	3	1	4	6
masiRNA_u_1420	CAUCAAUUCUUUGUCGUCGACGUU	Chr8	21052615	21052638	-		gene		8	5	11	8	10	8		0	0	0	0	0	0		2	9	5	4	1	2
masiRNA_u_1421	CUAGUACAACGAAUCUGAACAGAG	Chr8	21142910	21142933	-		repeat		4	7	1	4	4	8		0	0	0	0	0	0		4	6	1	3	2	2
masiRNA_u_1422	CAUAAAUCUUUGGAUGAUCUCCUG	Chr8	21693483	21693506	-		intergenic		2	2	2	3	2	8		0	0	0	0	1	0		0	0	1	4	2	6
masiRNA_u_1423	CGAAUAGACGAAUUGUAGUGGUAU	Chr8	22280704	22280727	-		repeat		5	13	2	6	1	9		0	0	0	0	0	0		7	5	2	6	4	8
masiRNA_u_1424	CGAAAAGCUGUAGUUGUAGAAUAC	Chr8	22741629	22741652	-		repeat		9	16	7	8	14	6		0	0	0	0	0	0		17	13	5	2	2	6
masiRNA_u_1425	CUUUUUAAGUACGUGUUUGAACAU	Chr8	22925601	22925624	-		repeat		5	7	6	5	2	10		0	0	1	0	0	0		2	11	1	4	2	0
masiRNA_u_1426	CUUCCGACAUCCGAACAAACGUCC	Chr8	24739108	24739131	-		repeat		6	4	4	1	5	6		0	0	0	0	0	0		3	4	1	0	2	0
masiRNA_u_1427	CUACCACUGACAUGUGGGACCGGU	Chr8	24789359	24789382	-		intergenic		4	8	3	6	2	8		0	1	0	0	0	0		8	7	4	3	1	6
masiRNA_u_1428	CAUCUGAACGGGGUAUCAACCGAU	Chr8	27471413	27471436	-		intergenic		2	4	2	1	4	7		0	0	0	0	0	0		2	6	5	4	2	1
masiRNA_u_1429	ACUGCAUAUCUGUUGAGCGCUGGC	Chr8	808862	808885	-		24-PHAS		0	0	7	9	3	6		0	0	2	0	2	2		0	1	0	0	5	1
masiRNA_u_1430	CUACCUAUAUAACUCCUGACGAAU	Chr8	1486648	1486671	-		intergenic		5	18	5	5	4	5		0	0	0	0	0	0		11	9	6	5	6	6
masiRNA_u_1431	CAAAAAUCCCUGUAGAAAAAAGAG	Chr8	3240228	3240251	-		intergenic		5	6	8	10	4	5		0	0	1	0	0	0		19	13	16	9	6	12
masiRNA_u_1432	CUAUGAAUCUGAACAGGAACUCGU	Chr8	3781442	3781465	-		repeat		4	2	4	7	2	5		0	0	0	0	0	0		1	8	8	3	4	1
masiRNA_u_1433	CAACUUAUCAACUGUUAGAAAAAG	Chr8	8131058	8131081	-		intergenic		4	12	4	11	0	4		0	0	0	0	0	0		14	19	14	15	2	5
masiRNA_u_1434	CUAUAAAUGGAUAAGUGAGACGAC	Chr8	14974088	14974111	-		intergenic		4	7	4	7	2	5		0	0	0	0	0	0		6	1	1	1	2	1
masiRNA_u_1435	CUAAAUAUUGUUGGUAAGAAGAUU	Chr8	15457534	15457557	-		gene		0	3	5	7	2	3		0	0	0	0	0	0		2	4	5	5	4	7
masiRNA_u_1436	CGAGAAAUAUUAGAACAAAUGCGU	Chr8	16294966	16294989	-		intergenic		1	13	5	8	2	4		0	0	0	0	0	0		4	4	5	1	0	2
masiRNA_u_1437	CUAAAAUACUUUGACGCCCAAAAU	Chr8	18174957	18174980	-		intergenic		2	4	3	7	0	3		0	0	0	1	0	0		4	4	4	3	3	1
masiRNA_u_1438	CUUGUUACUUGUGGCUCCGUACAG	Chr8	20239926	20239949	-		intergenic		5	9	7	3	1	3		0	0	0	0	0	0		7	5	6	3	1	0
masiRNA_u_1439	CUACACUUUAAUAUCUGAUCCCAC	Chr8	4389641	4389664	-		repeat		1	9	4	1	1	3		0	0	0	0	0	0		3	3	1	1	0	2
masiRNA_u_1440	CGAUUUUUUGUAAACAUGACCAGU	Chr8	8966033	8966056	-		intergenic		5	7	2	6	4	5		0	0	0	0	0	0		9	2	2	3	4	6
masiRNA_u_1441	CUGUGACGUGUGGACCCGGAAGAU	Chr8	11715137	11715160	-		repeat		13	10	1	1	1	1		0	4	0	0	0	0		2	4	1	0	0	1
masiRNA_u_1442	CAAAAUAGACGGAACCCUAAUGGC	Chr8	12357619	12357642	-		repeat		9	2	6	1	3	2		0	0	0	0	0	0		5	2	2	1	1	4
masiRNA_u_1443	CAGGACCUUCUCUCAUGUACUAGU	Chr8	17221344	17221367	-		intergenic		8	5	3	2	0	1		0	0	0	0	0	0		1	0	1	1	1	1
masiRNA_u_1444	CAACCGGGACUAAAGUAUUGAUCU	Chr8	18821178	18821201	-		repeat		7	7	3	0	1	1		0	0	0	0	0	0		5	3	2	2	1	2
masiRNA_u_1445	CUUCCCUUCAUGAAAUCUGAAAUC	Chr8	20240373	20240396	-		repeat		6	8	1	4	4	2		0	0	0	0	0	0		2	6	4	1	0	1
masiRNA_u_1446	CGAACUUCCCUUCAUGAAAUCUGA	Chr8	20240377	20240400	-		repeat		13	8	1	4	3	5		1	0	0	0	0	0		6	7	6	5	1	1
masiRNA_u_1447	CUUCCCUACUCCCUGUCUCCCAAC	Chr8	20241044	20241067	-		repeat		7	6	2	0	0	1		0	2	0	0	0	0		1	5	2	0	0	0
masiRNA_u_1448	CUGAAAAAGGAAGAAGGAAAUGAG	Chr8	22237853	22237876	-		intergenic		1	11	3	2	0	4		0	0	0	0	0	0		5	5	1	2	1	5
masiRNA_u_1449	CAAGUACACCGUCUGUCUCAAGAU	Chr8	23591907	23591930	-		repeat		3	8	0	2	0	2		0	0	0	0	0	0		1	2	2	0	0	1
masiRNA_u_1450	CAAUGAAAAAAUGAAUGGGGACGU	Chr8	23642874	23642897	-		intergenic		7	11	2	3	2	2		0	0	0	0	0	0		7	11	8	5	2	1
masiRNA_u_1451	CAAGACGAUUUGUGUGUAUGACAU	Chr8	23898726	23898749	-		repeat		5	9	3	3	2	2		0	0	0	0	0	0		1	8	4	2	3	1
masiRNA_u_1452	CUUCCACUAAUAAACUUACCCAUC	Chr8	24509858	24509881	-		gene		8	9	3	3	2	2		0	0	0	0	0	0		4	0	0	1	4	1
masiRNA_u_1453	CUAAGAUAUUUUAGGACUACGAAU	Chr8	25096527	25096550	-		intergenic		1	27	0	7	0	7		0	0	0	0	1	0		0	4	4	2	3	4
masiRNA_u_1454	CAGGAAUUUAUUGUGCUCAAGGAU	Chr8	25365577	25365600	-		intergenic		4	7	1	1	0	2		0	0	0	0	0	0		11	7	1	0	3	2
masiRNA_u_1455	CUGAACGGUCUAGAUUUAUUGUAU	Chr9	692584	692607	-		repeat		6	6	4	10	7	7		0	0	2	0	1	0		9	4	9	4	3	1
masiRNA_u_1456	GCAGAACAGAAGUGUGAGCUAAAU	Chr9	6634400	6634423	-		intergenic		10	15	36	39	29	38		0	0	0	0	0	0		4	2	13	26	38	43
masiRNA_u_1457	CAGAACAGUCGUGUGAGCUAAAUU	Chr9	6656639	6656662	-		intergenic		8	15	15	23	21	34		0	0	0	0	2	0		10	9	14	18	8	29
masiRNA_u_1458	CAUCUUGGUGUAUGUGAGAAUGAA	Chr9	7162128	7162151	-		repeat		19	60	19	30	3	18		0	3	1	2	0	2		63	61	40	29	8	20
masiRNA_u_1459	CAGCGAUCUUUAGUCCCAAGUGAA	Chr9	10032233	10032256	-		repeat		4	4	8	4	10	14		0	0	0	0	0	0		1	10	5	6	5	3
masiRNA_u_1460	UAAUUUUUUGUAGAACUUUUCGUG	Chr9	11810959	11810982	-		repeat		8	9	17	9	9	6		0	0	0	0	0	0		7	4	4	5	1	5
masiRNA_u_1461	CGGCUACAAAUAGAUGAACUAUGU	Chr9	12761093	12761116	-		repeat		16	3	10	6	7	4		0	0	0	0	0	0		9	3	4	2	2	3
masiRNA_u_1462	CACUGACAUGUAGACCCGAGGGGA	Chr9	17189219	17189242	-		intergenic		13	5	0	4	2	14		0	0	0	0	0	0		16	8	8	2	3	4
masiRNA_u_1463	CAAAUUUGUAGCCAGCUGUAGCAC	Chr9	17402220	17402243	-		repeat		9	18	6	7	7	11		0	0	0	0	0	0		16	15	8	4	9	3
masiRNA_u_1464	CUUCGGGACUAUAUAUCAGGGCAU	Chr9	18477083	18477106	-		repeat		32	34	11	20	10	17		0	0	0	0	1	1		20	13	14	7	4	8
masiRNA_u_1465	CAAGACUGAGUACUACCCACUGUA	Chr9	18625543	18625566	-		repeat		2	5	2	2	2	9		0	0	0	0	1	0		12	8	14	3	4	2
masiRNA_u_1466	CGAUUUACUGCGGAAAUUACUAAG	Chr9	19170530	19170553	-		intergenic		9	4	7	10	10	12		0	0	0	0	0	0		5	10	7	10	8	12
masiRNA_u_1467	CUAUUAUGCAUGUACUGUAGCAGU	Chr9	20533281	20533304	-		intergenic		10	16	19	15	10	27		0	0	0	0	0	0		14	28	13	19	3	8
masiRNA_u_1468	CUAACAUAACGAAUCUGGACUAAG	Chr9	20693261	20693284	-		repeat		30	67	31	10	27	43		0	0	0	0	0	0		41	34	36	17	20	33
masiRNA_u_1469	CUAAACUAUGUAUACCGGACGAAU	Chr9	20873611	20873634	-		repeat		6	19	12	10	2	9		0	0	0	0	1	0		20	8	10	5	5	8
masiRNA_u_1470	CUAAUAUGUGUGCUCGGAUAUCAU	Chr9	20927875	20927898	-		intergenic		34	43	34	19	25	25		1	0	0	0	0	0		9	28	13	11	12	11
masiRNA_u_1471	CUAGAAGUUUGUGUGUAGAAAAAU	Chr9	21291599	21291622	-		repeat		2	5	4	6	5	15		0	1	0	0	0	0		7	4	17	4	1	1
masiRNA_u_1472	CAUCAACACGUUGUAACUACUCCC	Chr9	21304791	21304814	-		intergenic		6	4	6	3	2	8		0	0	0	0	0	0		13	2	4	0	3	3
masiRNA_u_1473	CUAGUACGAUGAAUCUGAACAGAU	Chr9	22104209	22104232	-		repeat		2	7	1	8	2	8		0	0	0	0	0	0		7	5	10	4	4	3
masiRNA_u_1474	CUUUCGAAAGAUGUAUAGGUACUC	Chr9	22444395	22444418	-		repeat		2	11	6	9	0	15		0	0	0	0	0	0		20	14	11	7	8	6
masiRNA_u_1475	CUUUUACAAAUCCGUCUCAUGCAG	Chr9	5117447	5117470	-		intergenic		3	6	7	5	4	4		0	0	0	0	0	0		4	1	3	3	2	6
masiRNA_u_1476	CAUCUAAAAAAAGUUGAGACUAGA	Chr9	10390384	10390407	-		repeat		10	2	6	6	1	4		0	0	0	0	0	0		2	8	1	4	2	7
masiRNA_u_1477	CUUUUUUGUUGGACCGGAGCAAAU	Chr9	13856199	13856222	-		repeat		2	8	3	9	3	2		0	0	0	0	0	0		2	4	5	3	3	0
masiRNA_u_1478	CUAACCCAAUAAGUAGGAUGAUGU	Chr9	19950521	19950544	-		repeat		3	4	7	8	2	6		0	0	0	0	0	0		5	6	2	3	4	6
masiRNA_u_1479	CUAGACAACGACGAUCUGACCGAC	Chr9	698652	698675	-		repeat		7	8	3	1	5	1		0	0	0	0	0	0		2	0	1	1	1	1
masiRNA_u_1480	CAAGCCGAUCUUUUAGCUGGACAG	Chr9	6217138	6217161	-		repeat		3	8	1	1	3	0		0	0	0	0	0	0		2	2	0	3	0	0
masiRNA_u_1481	CCGGAAAUUAACUACUUAGACACC	Chr9	7162471	7162494	-		repeat		5	6	0	3	0	2		0	0	0	0	0	0		9	2	0	1	2	0
masiRNA_u_1482	CAAGGACAUGCUCAAAUACAUAUU	Chr9	7163491	7163514	-		intergenic		4	8	2	2	1	2		0	0	0	0	0	0		3	6	1	3	1	1
masiRNA_u_1483	CGAAGGAUUGGUAUCAUGCACGAG	Chr9	8806330	8806353	-		repeat		7	8	2	1	0	0		0	0	0	0	0	0		0	1	0	2	0	0
masiRNA_u_1484	CUCUCCGUCCUAGAAUGUAGCUAU	Chr9	9378409	9378432	-		repeat		10	8	4	1	2	2		0	0	0	0	0	0		12	2	8	2	4	1
masiRNA_u_1485	CAUUCCAUCCACCUUCUGUUAGAG	Chr9	11816332	11816355	-		intergenic		8	12	2	0	5	2		1	0	0	0	0	0		6	6	4	1	1	2
masiRNA_u_1486	CAGGCAUAUCUUGAGAUCGACGAA	Chr9	13706158	13706181	-		repeat		5	10	3	6	2	7		1	0	0	0	0	0		6	6	5	4	3	3
masiRNA_u_1487	CUUUACGCUGUAGAUCUGCCCCUG	Chr9	14151073	14151096	-		repeat		4	7	0	2	0	0		0	0	0	0	0	0		2	0	2	1	1	0
masiRNA_u_1488	CAAGCAACAGUGGUCUUAAGACGU	Chr9	14979886	14979909	-		repeat		3	9	2	3	2	0		0	0	0	0	0	0		5	4	3	1	1	3
masiRNA_u_1489	CAAGAGUUGGAUGAAGAUUAAGAU	Chr9	15595141	15595164	-		repeat		2	8	0	2	0	4		0	0	0	0	0	0		6	5	1	1	4	2
masiRNA_u_1490	CUAAUAGACGAAUUGUAAUGGCAU	Chr9	16102712	16102735	-		repeat		2	8	0	2	1	4		1	1	0	0	0	0		9	5	9	8	3	2
masiRNA_u_1491	CAAGAUAUUAGAAGGACCAGAAAG	Chr9	17360813	17360836	-		repeat		6	6	3	1	2	4		0	0	0	0	0	0		5	2	1	1	1	1
masiRNA_u_1492	CAAAUCCGUCGUGUGUAUAGCAUU	Chr9	17901960	17901983	-		intergenic		3	7	4	1	2	5		0	0	0	0	0	0		5	0	0	0	2	0
masiRNA_u_1493	CCGAGGACUACAAUAAAACACGAG	Chr9	18043413	18043436	-		intergenic		5	7	3	1	2	1		0	0	0	0	0	0		2	0	1	0	2	2
masiRNA_u_1494	CGAUCUACUUUGGGCCUGUUCAGU	Chr9	19877219	19877242	-		intergenic		8	2	1	1	2	0		0	0	0	0	0	0		1	3	0	0	0	2
masiRNA_u_1495	CUAACUUUAGCAGUCGGAGCACGU	Chr9	20554653	20554676	-		intergenic		9	8	1	2	0	3		0	0	0	0	0	0		4	3	1	1	1	3
masiRNA_u_1496	CAACGUGGUGUAGCGUUGGACAGU	Chr10	108824	108847	-		repeat		0	6	2	6	6	7		0	0	0	0	0	0		1	2	3	1	3	8
masiRNA_u_1497	CUGAUGACGAUUAUCGGUGGUGAG	Chr10	708401	708424	-		intergenic		0	4	3	4	2	8		0	0	0	1	0	0		3	3	4	3	5	2
masiRNA_u_1498	CUUCCAAAGGAUUGUAAAGCUGGA	Chr10	728090	728113	-		intergenic		24	34	13	20	9	16		2	9	4	0	0	1		35	46	15	21	2	11
masiRNA_u_1499	CUUUCACAACCAAUGUAGGACUAU	Chr10	1903583	1903606	-		repeat		10	25	7	9	3	8		0	1	0	0	0	0		20	27	27	19	5	4
masiRNA_u_1500	CGGUCUUCAAAACACAACUUUGAC	Chr10	2254588	2254611	-		repeat		2	4	5	5	3	7		0	0	0	0	0	0		2	9	0	6	1	6
masiRNA_u_1501	CUUCUCAAGGACUAUAAAAUCGAU	Chr10	2855242	2855265	-		gene		9	9	7	6	10	10		1	1	0	0	0	0		7	5	8	10	4	7
masiRNA_u_1502	CUACUCUACUUUUAUUUAAAAAAU	Chr10	3900324	3900347	-		intergenic		2	7	1	4	6	4		0	0	0	0	0	0		3	0	5	4	1	7
masiRNA_u_1503	CAACAAUUGAUAGACGACGUCCUG	Chr10	5565070	5565093	-		intergenic		34	49	10	7	9	7		0	1	0	0	0	0		28	32	13	7	8	10
masiRNA_u_1504	CUUCGACUAGUGGUAUCUCUUCCU	Chr10	5927804	5927827	-		repeat		3	1	2	3	8	5		0	0	0	0	0	0		1	0	1	0	2	3
masiRNA_u_1505	CAAUCGAUUUGUGUCGCGACUCCG	Chr10	5928674	5928697	-		repeat		2	2	5	1	14	19		0	0	0	0	0	0		4	3	3	5	7	8
masiRNA_u_1506	CAAGUGAAGGCUGACGAUCUACUA	Chr10	5929645	5929668	-		intergenic		2	1	0	0	4	6		0	0	0	0	0	0		0	1	0	0	2	3
masiRNA_u_1507	CUAGGGCUUCAAGUAUCGAUCUGU	Chr10	5930017	5930040	-		repeat		1	2	2	4	5	6		0	0	0	0	0	0		6	2	2	1	4	2
masiRNA_u_1508	CCGGAAUGAGCAGAAUAGAAAGGA	Chr10	5930149	5930172	-		repeat		1	0	0	1	6	5		0	0	0	0	0	0		0	0	0	1	1	1
masiRNA_u_1509	CAAAUCAGAUUGAAGCUCACCGGA	Chr10	5930168	5930191	-		repeat		1	5	6	9	13	13		0	0	0	0	0	0		6	4	7	6	10	5
masiRNA_u_1510	CAACAAAUCAGAUUGAAGCUCACC	Chr10	5930171	5930194	-		repeat		1	5	4	4	2	11		0	0	0	0	0	0		4	4	5	3	2	5
masiRNA_u_1511	CAUCGAAUCUUUAGACACAUGCAU	Chr10	6291037	6291060	-		repeat		4	7	7	4	4	6		0	0	0	0	0	0		11	12	4	5	3	3
masiRNA_u_1512	CUAUAUAUUUUAGGACAAAGGAAG	Chr10	9768664	9768687	-		repeat		6	5	5	4	5	8		0	0	0	1	0	0		5	9	4	4	4	6
masiRNA_u_1513	CUUGGAAACUAUCGUUGGAUCGAG	Chr10	10219396	10219419	-		repeat		48	53	38	50	51	93		1	1	5	0	1	0		84	91	61	51	24	68
masiRNA_u_1514	CGGGAUCUCGACCUCCACAUCCAU	Chr10	10320755	10320778	-		repeat		15	33	13	18	14	17		0	0	0	0	0	0		20	22	16	14	14	17
masiRNA_u_1515	CGACCGGCAAUGAUCACUAUAGAG	Chr10	10687886	10687909	-		repeat		5	5	0	1	5	5		1	0	0	0	0	1		3	1	1	2	0	1
masiRNA_u_1516	CACAACCCAAAAGACUAGUCUGAU	Chr10	10948163	10948186	-		repeat		8	20	6	21	6	18		0	0	0	0	0	1		30	27	15	23	19	9
masiRNA_u_1517	CAAUUCGAUGCGGACUACUAACUG	Chr10	11843088	11843111	-		24-PHAS		0	0	2	10	5	7		0	0	0	0	0	0		0	0	0	0	0	0
masiRNA_u_1518	CAACUGAGUACAAUGACCAUGAUC	Chr10	11843184	11843207	-		24-PHAS		0	0	4	5	14	26		0	0	0	0	0	0		0	0	0	0	0	0
masiRNA_u_1519	CUUUCAAUUUUAGCGUGAACCGGA	Chr10	11845536	11845559	-		repeat		2	5	2	5	5	6		0	0	0	0	0	0		7	5	2	3	1	2
masiRNA_u_1520	CGAUUGAAUUUGGUAGACUCCAAU	Chr10	11861509	11861532	-		24-PHAS		0	1	2	12	5	44		0	0	0	0	0	0		0	0	0	0	2	0
masiRNA_u_1521	UUGGCACUACUGAGUACAAUGACG	Chr10	11861919	11861942	-		24-PHAS		1	0	2	3	4	6		0	0	0	1	1	2		0	0	0	0	1	1
masiRNA_u_1522	CUACGAAUCCGGGACUAAAGAUAG	Chr10	13738242	13738265	-		repeat		6	12	9	5	6	16		0	2	0	0	0	0		9	10	8	3	3	7
masiRNA_u_1523	CUUCCGUCUUAGAAAUUCGCUCGC	Chr10	13910043	13910066	-		intergenic		7	3	1	0	4	7		0	0	0	0	0	0		4	2	3	1	2	1
masiRNA_u_1524	CUAAUGAUGGUACACAGUAGACGU	Chr10	14510457	14510480	-		intergenic		4	2	8	3	12	7		0	0	0	0	0	0		6	4	3	2	3	2
masiRNA_u_1525	CUCCGUCUAUAAAAAGAAUUCAAU	Chr10	14708805	14708828	-		gene		6	2	6	2	7	3		0	0	0	0	0	0		2	0	2	3	2	1
masiRNA_u_1526	CUAACCUUCGUUGUGGCAAAGUGU	Chr10	15626405	15626428	-		repeat		4	15	6	10	2	9		0	0	0	0	0	0		10	5	8	5	0	3
masiRNA_u_1527	CUGGUACUACGAAUCUGAACAAAC	Chr10	15811106	15811129	-		repeat		12	8	5	5	7	8		0	1	0	0	0	1		9	8	4	3	2	3
masiRNA_u_1528	CAAAAUACGAAUGACGGCAAAAAU	Chr10	17382813	17382836	-		repeat		9	25	6	12	4	8		0	0	0	0	0	0		25	9	10	12	8	7
masiRNA_u_1529	CUAAAACUGGUUGAAACUGACUGC	Chr10	18598396	18598419	-		intergenic		5	11	8	14	9	11		0	0	0	0	0	0		12	14	9	5	6	8
masiRNA_u_1530	CACUGACGUGUGGAGUAAUAAGAG	Chr10	19107963	19107986	-		intergenic		16	6	7	5	7	11		0	0	0	1	0	0		13	10	9	2	4	1
masiRNA_u_1531	CUAUUCAUAGUCAAAACUGUUAUU	Chr10	20090674	20090697	-		24-PHAS		1	0	5	13	10	26		0	0	1	0	0	0		0	1	0	0	0	0
masiRNA_u_1532	CAAUCCAACGGUGUAGGACGAGAG	Chr10	21467362	21467385	-		repeat		4	4	1	4	5	6		0	0	0	0	0	0		5	9	7	5	5	3
masiRNA_u_1533	CAAAAAAGGAUAACGUAAGACCAG	Chr10	21769070	21769093	-		intergenic		1	5	3	5	2	11		0	0	0	0	0	0		6	4	5	4	0	4
masiRNA_u_1534	CAAAGGAUUGUAAAGCUGGAUAUG	Chr10	728086	728109	-		intergenic		11	7	4	6	2	0		0	0	1	0	0	0		13	8	6	5	3	4
masiRNA_u_1535	CAAGUCAUCUAUAGCAAAUCUAAU	Chr10	799817	799840	-		repeat		1	2	6	6	0	2		0	0	0	0	0	0		1	2	7	1	1	0
masiRNA_u_1536	CUUCCUUAAGAACUGUAGAAUUGC	Chr10	2368817	2368840	-		repeat		10	2	6	5	5	3		0	0	0	0	0	0		5	4	3	4	2	1
masiRNA_u_1537	CAAAUAUGUGUCUGUAUAUCCGAU	Chr10	7812829	7812852	-		repeat		3	8	3	8	0	4		0	0	0	0	0	0		3	2	4	1	1	3
masiRNA_u_1538	CGACCUCCACAUCCAUAUCCCACU	Chr10	10320747	10320770	-		repeat		5	9	6	5	4	3		0	0	0	0	0	0		5	2	8	0	3	1
masiRNA_u_1539	CGAAUCUAUAGUGUAAGGACUGAU	Chr10	13106247	13106270	-		repeat		8	5	6	5	3	3		0	0	0	0	0	0		7	2	2	1	1	7
masiRNA_u_1540	CAUUUUUUAGUUGGUGUGCACGUG	Chr10	22638754	22638777	-		repeat		27	12	17	8	7	0		0	0	0	0	0	0		7	10	2	2	2	2
masiRNA_u_1541	CAAUGUUAAGCGGGCGGAUAAGGU	Chr10	728726	728749	-		intergenic		5	5	2	1	0	0		0	1	0	0	0	0		0	0	2	0	0	0
masiRNA_u_1542	CUUCUCACUGUUUUAUUUGUUCAU	Chr10	3880563	3880586	-		gene		7	9	2	3	2	3		0	0	0	0	0	0		5	6	1	2	1	1
masiRNA_u_1543	CAUUUUUAGAUGGACUUAGACGAU	Chr10	3886870	3886893	-		intergenic		7	10	2	4	4	3		0	0	0	0	0	0		3	4	0	2	1	1
masiRNA_u_1544	CAAUUGAUAGACGACGUCCUGGGU	Chr10	5565067	5565090	-		intergenic		5	5	0	0	1	0		2	0	0	0	0	0		5	2	0	2	1	0
masiRNA_u_1545	CAUUUUUUUAGAGUUGGACACGGU	Chr10	10786391	10786414	-		repeat		13	8	5	0	3	1		0	1	0	0	0	0		5	2	5	4	0	0
masiRNA_u_1546	CUAACGUGUACCCACCUGACAAAU	Chr10	11235368	11235391	-		repeat		6	8	5	4	3	4		0	0	0	1	0	0		4	1	4	1	3	5
masiRNA_u_1547	CAACGCCACAUGGGACGAAGACAG	Chr10	11547390	11547413	-		repeat		3	7	2	0	0	2		0	0	0	0	0	0		2	1	0	0	0	0
masiRNA_u_1548	CAAUGUUUUAACGAGGGGUGGGAG	Chr10	11713236	11713259	-		repeat		8	2	0	0	1	0		0	0	0	0	0	0		1	1	0	1	2	1
masiRNA_u_1549	CAAUCUAAAGAGGUCUCUGUACAG	Chr10	11962827	11962850	-		repeat		4	6	1	5	6	3		0	0	0	0	0	0		5	5	2	4	5	2
masiRNA_u_1550	CAGCCAGAGGAUGUGGAGACCGAG	Chr10	12764002	12764025	-		intergenic		6	21	2	2	3	3		0	1	0	0	0	0		5	7	5	3	1	1
masiRNA_u_1551	CAAUCUAAGUACUGUGGGAUACGC	Chr10	13620626	13620649	-		repeat		4	9	1	1	0	0		0	1	0	0	0	0		10	2	2	2	0	0
masiRNA_u_1552	CUAUAGAUAAAGUAGAUAAAGAUG	Chr10	13621397	13621420	-		intergenic		5	11	2	3	0	2		0	1	1	0	0	0		6	7	1	5	1	4
masiRNA_u_1553	CUUUUGCUAGUAGAUCUGAAACUG	Chr10	13910004	13910027	-		intergenic		4	8	2	3	1	1		0	1	0	0	0	0		5	6	3	4	0	1
masiRNA_u_1554	CUAUGACAUGUAUUCGAGACUAGU	Chr10	19027762	19027785	-		intergenic		5	7	2	2	1	1		0	1	0	0	0	0		3	3	3	1	1	2
masiRNA_u_1555	CAAGUCAUCUCUGUUUCCUCACGU	Chr10	19388642	19388665	-		intergenic		6	9	6	1	0	3		0	0	0	0	0	0		3	3	1	0	2	2
masiRNA_u_1556	CAUAACAACUGAGACCGAAGAGAG	Chr10	21551572	21551595	-		repeat		1	9	2	0	0	1		0	0	0	0	0	0		6	1	2	1	0	1
masiRNA_u_1557	CUUCGAAUGUAUGAGCGUGCCAGA	Chr10	21878726	21878749	-		repeat		6	5	1	1	3	5		0	0	0	0	0	0		5	5	1	2	2	0
masiRNA_u_1558	CAGAGAAUUGGUGAGUGACGCAAG	Chr11	1020769	1020792	-		gene		6	4	4	0	9	3		0	0	0	0	0	0		2	4	3	0	2	1
masiRNA_u_1559	CUAACGUGUGGACCCUCUAUCCAG	Chr11	2285554	2285577	-		intergenic		9	8	5	3	9	10		0	0	0	0	0	0		5	12	3	3	2	3
masiRNA_u_1560	CUGACUUUUGAACAUAUGUUUGAU	Chr11	2574719	2574742	-		repeat		2	3	5	5	3	10		0	0	0	0	0	0		3	12	2	4	2	3
masiRNA_u_1561	CGAUCGGCAGAACAAAAAUAGAGC	Chr11	3230559	3230582	-		intergenic		9	2	20	9	21	15		0	0	0	0	2	0		5	3	3	6	18	7
masiRNA_u_1562	CUGUACAAGAUAGAACAUGACAUG	Chr11	3231032	3231055	-		intergenic		3	2	6	7	6	11		0	0	1	0	0	0		4	4	9	3	4	10
masiRNA_u_1563	CAUCUCCAUGGAGUCAGGACCAGC	Chr11	3231261	3231284	-		intergenic		3	2	3	3	6	6		0	0	0	0	0	0		5	2	4	0	2	2
masiRNA_u_1564	CGACAUGUUGUGCUCAGCCAUUUU	Chr11	4125056	4125079	-		repeat		0	0	1	0	15	5		0	0	0	0	3	0		0	0	1	0	12	9
masiRNA_u_1565	CAAAGAGACUGUCUUGACAUAGAG	Chr11	4164947	4164970	-		intergenic		11	22	12	10	3	14		0	2	0	0	0	0		25	17	15	6	9	0
masiRNA_u_1566	CAAAGAUGAGUGCAUUGUAGAGAG	Chr11	6508306	6508329	-		intergenic		22	24	6	8	2	9		0	0	1	0	0	0		29	22	8	3	3	5
masiRNA_u_1567	CGAAAAGACAAAAUUAGACGUGAA	Chr11	6946013	6946036	-		repeat		0	3	1	3	2	8		0	0	0	0	0	0		3	2	4	2	1	1
masiRNA_u_1568	CUUCAUAUCAAGGAGACGAGCCAG	Chr11	7121521	7121544	-		intergenic		6	15	6	3	3	13		0	1	0	0	1	0		17	9	10	3	8	7
masiRNA_u_1569	CCAAGAUUUGAACUUCACCGCCGC	Chr11	7732449	7732472	-		intergenic		1	5	2	4	7	5		0	0	0	0	0	0		1	2	1	1	5	3
masiRNA_u_1570	CAAGAUGACAUGUUUUACUAUGGA	Chr11	7732686	7732709	-		intergenic		0	1	0	3	2	8		0	0	0	0	0	0		1	1	2	3	1	1
masiRNA_u_1571	CAUGAAUGUCCAUUGUAGAACAAG	Chr11	7734910	7734933	-		intergenic		0	0	1	2	1	9		0	0	0	0	0	0		1	1	1	0	6	4
masiRNA_u_1572	CAAGCCGACUCGGGCGGACGUGGC	Chr11	7738393	7738416	-		repeat		3	2	6	1	16	10		0	0	0	0	0	1		0	0	1	2	5	5
masiRNA_u_1573	CAAAACUAUAGAGGUCGACCGAAU	Chr11	11338768	11338791	-		repeat		7	4	2	4	3	7		0	0	0	0	0	0		7	5	2	2	2	2
masiRNA_u_1574	CAAAAAGACGUACUGGUUUAGCAC	Chr11	14972972	14972995	-		gene		26	13	13	7	12	11		0	0	0	0	0	0		13	16	10	7	6	4
masiRNA_u_1575	CAACGUAUCCUAGAACUCAAGAGG	Chr11	16333187	16333210	-		intergenic		10	5	21	10	39	26		0	0	0	0	1	0		5	9	9	7	14	17
masiRNA_u_1576	CAACUGUGCAAGGACCGUUUGUGU	Chr11	16335286	16335309	-		repeat		0	2	6	4	4	6		0	0	0	0	0	0		2	1	5	1	2	4
masiRNA_u_1577	CAAUCUGACUAUAGGUUACUCUAU	Chr11	16942969	16942992	-		intergenic		8	15	6	9	11	9		0	0	1	0	0	0		10	8	2	5	2	5
masiRNA_u_1578	CAAGGUAAAGAACAAAAGCAACAG	Chr11	17385126	17385149	-		repeat		13	11	8	4	4	8		0	0	0	0	0	0		0	0	1	0	0	0
masiRNA_u_1579	CUAAAUGUGUUGUACUGUAGCAGU	Chr11	18416724	18416747	-		intergenic		2	7	3	5	5	12		0	0	0	0	0	0		5	6	8	2	4	4
masiRNA_u_1580	CUCGGACUUGUGGUUUGACUCCAC	Chr11	18416752	18416775	-		intergenic		8	27	12	7	7	23		0	2	1	0	1	0		16	13	12	10	7	5
masiRNA_u_1581	CUAUGGUAGAGAGACGGACUAAAG	Chr11	18586202	18586225	-		repeat		8	2	6	0	6	5		0	0	0	0	0	0		2	1	2	3	0	1
masiRNA_u_1582	CAACAACUUAAUAAACUAGACGAU	Chr11	18686365	18686388	-		repeat		0	5	7	7	4	7		0	0	0	0	0	0		8	3	4	7	3	4
masiRNA_u_1583	CUAGGUAACAUUGUUGAACUCAUG	Chr11	19100655	19100678	-		intergenic		13	37	15	15	5	15		0	1	1	0	1	0		46	41	13	10	7	14
masiRNA_u_1584	CAACUGUGAAUUUCUGUGUCUAAC	Chr11	19255467	19255490	-		repeat		9	12	10	10	16	8		0	0	0	0	0	0		17	10	10	4	3	6
masiRNA_u_1585	CAAGGGAUUGUAGGUUUAAAAUAG	Chr11	21681076	21681099	-		gene		2	14	6	7	2	12		0	0	0	0	0	0		4	1	6	3	0	3
masiRNA_u_1586	CUUUGAAUCGUUAUUGCAAAACUG	Chr11	21803493	21803516	-		repeat		1	16	5	15	2	18		1	0	0	0	0	0		17	17	16	18	4	13
masiRNA_u_1587	CAACCUAAGGUACGGGCUGUCGAG	Chr11	22339130	22339153	-		repeat		0	1	5	5	6	13		0	0	0	0	0	0		1	4	3	5	6	3
masiRNA_u_1588	CUAAAAGUUGUUAUAUUCUGGGAC	Chr11	22542865	22542888	-		repeat		2	7	3	11	6	4		0	0	0	0	0	0		3	7	7	1	7	6
masiRNA_u_1589	CUAUUUAGUGCCCACCCCAUCUUC	Chr11	23103416	23103439	-		24-PHAS		0	0	9	8	16	16		0	0	0	0	0	1		0	0	0	0	0	0
masiRNA_u_1590	CUACCACUCUCAAUUAAACUAAAU	Chr11	23106634	23106657	-		24-PHAS		0	0	5	14	10	13		0	0	0	0	0	0		0	0	0	0	0	0
masiRNA_u_1591	CAAACGACUGUACUGCAUUAGCAC	Chr11	23323376	23323399	-		intergenic		7	10	9	5	6	7		0	0	0	0	0	0		10	9	8	7	5	10
masiRNA_u_1592	CAGACCAAGUAUGUCCUAGACGAU	Chr11	24087708	24087731	-		repeat		9	18	9	12	5	14		0	0	0	0	0	0		11	20	8	9	4	14
masiRNA_u_1593	CAUCGUGAGGCAGAGACAUCUAAG	Chr11	24392552	24392575	-		intergenic		5	6	3	8	6	18		0	0	0	0	2	0		2	6	5	3	8	8
masiRNA_u_1594	CUACUCAUCGUGAGGCAGAGACAU	Chr11	24392557	24392580	-		intergenic		2	5	2	3	2	10		0	0	0	0	0	0		0	0	1	3	1	1
masiRNA_u_1595	CAAAUUAUGACUGUGUGUGCCCAU	Chr11	24393795	24393818	-		intergenic		23	28	69	55	72	108		0	0	0	0	1	0		38	28	56	27	68	39
masiRNA_u_1596	CAGGAAUAGGAAAAAUAUAGGAAU	Chr11	24805943	24805966	-		repeat		3	9	2	5	4	9		0	0	0	0	0	0		5	10	3	3	3	5
masiRNA_u_1597	CAAAAUCUCACAAAGUAGCCGCUU	Chr11	25567099	25567122	-		24-PHAS		0	0	0	7	5	15		0	0	0	0	0	1		0	0	0	0	0	0
masiRNA_u_1598	CUUAGUGACUAUUUGAAUGGCAAU	Chr11	26766378	26766401	-		intergenic		7	9	11	17	9	17		1	1	0	0	0	0		8	9	10	14	6	8
masiRNA_u_1599	CUCAAAACCGCCGAGGGACCUAAU	Chr11	28470564	28470587	-		repeat		5	16	4	9	2	12		0	1	0	0	0	0		14	12	10	1	8	6
masiRNA_u_1600	CUAUAGUAUUAUGAAUCCGGACAU	Chr11	4434705	4434728	-		repeat		3	11	8	6	2	1		0	0	0	0	0	0		5	3	11	4	2	3
masiRNA_u_1601	CCAAUUUAAAUGAAAAUCGACGGU	Chr11	6444429	6444452	-		repeat		5	4	6	4	0	7		0	0	0	0	0	0		4	12	2	4	2	3
masiRNA_u_1602	CUAACACAUGCUGUAAGAGACGGA	Chr11	7026162	7026185	-		intergenic		11	5	5	5	2	6		0	0	0	0	0	0		1	7	1	5	0	1
masiRNA_u_1603	CUUAAAAACUAUCGUUGGAUCGAG	Chr11	17249144	17249167	-		repeat		4	3	2	9	3	2		0	0	0	0	0	0		7	4	6	5	2	4
masiRNA_u_1604	CUAAGACUAUAAAUCUGAACGGAG	Chr11	18739923	18739946	-		repeat		4	12	2	9	3	4		0	0	0	0	0	0		15	10	12	3	2	2
masiRNA_u_1605	CGAUCUAGAGUAGAAUAAUUUAAG	Chr11	22019068	22019091	-		repeat		5	7	9	3	0	8		0	1	0	0	0	0		3	11	3	2	0	2
masiRNA_u_1606	CAGGGCAAUAUUGUACGCGACAGC	Chr11	26482142	26482165	-		intergenic		8	14	10	5	4	3		1	0	0	0	0	0		7	7	4	1	3	1
masiRNA_u_1607	CUAGGACUACGAAUCUGGACAUGU	Chr11	1144271	1144294	-		repeat		4	6	6	1	1	6		0	1	0	0	0	0		2	5	0	3	2	1
masiRNA_u_1608	CUACUCUCACUUGUGACAUCCGAU	Chr11	5217330	5217353	-		intergenic		6	10	1	5	0	3		0	0	0	0	0	0		7	2	4	7	2	0
masiRNA_u_1609	CAAGAGAAAAAAAACCACGGACGC	Chr11	5285292	5285315	-		repeat		9	5	4	0	1	2		0	0	0	0	0	0		6	1	2	4	5	0
masiRNA_u_1610	CAUUCUUCUGAUGGUGGGACUGAG	Chr11	6075294	6075317	-		intergenic		8	13	0	6	1	2		0	0	0	0	0	0		11	7	3	5	4	1
masiRNA_u_1611	CAGAGACAAAGGAUUUAGACAGGU	Chr11	6287251	6287274	-		repeat		13	15	4	2	3	2		0	2	0	0	0	0		7	2	1	2	3	1
masiRNA_u_1612	CUACGUCACGUUGGAAAAAACCGC	Chr11	9693747	9693770	-		repeat		5	5	2	3	0	3		0	0	0	0	0	0		6	7	5	2	1	3
masiRNA_u_1613	CAAUCUGUAGCGCACCCAACACGU	Chr11	13666610	13666633	-		repeat		6	4	3	6	1	2		0	0	0	0	0	0		2	4	0	0	1	0
masiRNA_u_1614	CGAAGGAAAGUAGUCGAUUGACAG	Chr11	16506412	16506435	-		repeat		5	9	2	5	1	2		0	0	0	0	0	0		6	1	3	2	1	3
masiRNA_u_1615	CAGACUACAGCUUUCCGACACGCU	Chr11	16721464	16721487	-		repeat		9	2	1	0	0	1		0	0	0	0	0	0		0	0	0	0	0	0
masiRNA_u_1616	CUACGGUCUAAAGAGGGUAUUGAU	Chr11	20439001	20439024	-		intergenic		12	11	2	4	2	6		1	0	0	0	0	0		14	6	9	2	3	1
masiRNA_u_1617	CUUUCCCGGUACGUGUAAUCUGAG	Chr11	20618859	20618882	-		intergenic		3	8	2	2	4	5		0	0	0	0	0	0		2	5	2	4	2	3
masiRNA_u_1618	CUGGGCAAAGGUCACUGAUGUGAG	Chr11	20832974	20832997	-		repeat		9	5	4	1	1	6		0	0	0	0	1	0		2	1	1	1	5	5
masiRNA_u_1619	CUGAAUAUCGUAUAAAGAGGAGAC	Chr11	21661736	21661759	-		intergenic		3	11	3	1	2	1		0	0	0	0	0	0		6	3	1	2	1	0
masiRNA_u_1620	CUAGGGCUAGUGUGAUAAAUCAGU	Chr11	21935038	21935061	-		intergenic		11	21	5	2	0	2		0	0	0	1	0	0		7	5	5	2	4	0
masiRNA_u_1621	CAAUUGUUCGUCCCAGCUUUCGUG	Chr11	26756170	26756193	-		intergenic		6	11	0	3	1	0		0	1	0	0	0	0		5	1	1	1	0	1
masiRNA_u_1622	CAAAGACAUAAAUAAUGAUAAGAC	Chr11	26766044	26766067	-		intergenic		1	9	0	5	0	1		0	0	0	0	0	0		2	4	3	3	0	0
masiRNA_u_1623	CUUAAAAAAAAAGCCGACACUGAU	Chr11	28749238	28749261	-		repeat		2	9	1	4	1	7		0	0	0	0	0	0		6	9	5	5	4	2
masiRNA_u_1624	CAAGAAGUGUGUGCGUGGACUAAC	Chr12	888482	888505	-		repeat		75	67	25	16	31	25		0	0	1	0	0	0		34	46	21	8	25	11
masiRNA_u_1625	CAAAAAUAUAUUUUGUAGACCGUG	Chr12	1077843	1077866	-		repeat		2	4	7	1	3	8		0	0	0	0	0	0		3	2	2	0	2	2
masiRNA_u_1626	CAAGACGAUGUGUAUGUAUGAGAU	Chr12	1821903	1821926	-		repeat		11	14	5	5	6	4		0	0	0	0	0	0		8	10	6	4	2	3
masiRNA_u_1627	CUCUUCCAAGUAGAAAAAUAUGCU	Chr12	1884212	1884235	-		repeat		5	10	5	9	5	11		0	0	0	0	0	0		8	7	2	4	1	5
masiRNA_u_1628	CUAUAGAUCUGUAGCCCGCUGCUC	Chr12	3689936	3689959	-		repeat		15	13	8	9	11	7		2	3	0	0	0	1		8	8	3	2	3	0
masiRNA_u_1629	CUAAGACAACGAAUCUGGAGGGGU	Chr12	3951224	3951247	-		repeat		22	15	11	4	5	7		0	1	0	0	0	0		7	9	2	6	5	2
masiRNA_u_1630	CAAAGACUUGUGGUAUCUUAGAGU	Chr12	4230305	4230328	-		repeat		2	10	4	2	3	11		0	0	0	0	0	0		6	2	1	2	2	3
masiRNA_u_1631	CUAAGGAAAGUUAAGGUGGUUUGU	Chr12	4735135	4735158	-		gene		2	2	1	2	6	5		0	0	0	0	0	0		0	0	1	1	0	2
masiRNA_u_1632	CUGAAGAUCUUUUUUACACCUAUU	Chr12	4735409	4735432	-		intergenic		1	2	2	0	5	7		0	0	0	0	0	0		0	1	2	3	1	3
masiRNA_u_1633	CUACUGAAGAUCUUUUUUACACCU	Chr12	4735412	4735435	-		intergenic		6	3	11	6	13	20		0	0	0	0	0	0		4	7	11	14	5	4
masiRNA_u_1634	CAAACGGAAAUCGAACAAGGUGAU	Chr12	4736106	4736129	-		repeat		3	6	9	11	8	26		0	0	1	0	0	0		5	8	5	9	10	18
masiRNA_u_1635	CAAAGAUCUGUAGAUAAUCCUAUG	Chr12	4901343	4901366	-		intergenic		4	2	27	16	44	49		0	0	1	0	0	0		6	8	18	9	19	15
masiRNA_u_1636	CUAUUUAUGAUAUCGGCUACGUGU	Chr12	5205372	5205395	-		repeat		16	17	14	12	14	7		0	0	1	0	0	0		5	4	2	4	1	4
masiRNA_u_1637	CUUGGACUAAUUCACGAGACGAAU	Chr12	6975201	6975224	-		repeat		2	20	6	14	4	15		0	0	0	0	0	2		10	13	15	6	9	9
masiRNA_u_1638	CGGUCAAAUGUUGUAUAUGAACAG	Chr12	7803011	7803034	-		repeat		3	11	8	11	4	16		0	0	0	0	0	0		25	15	11	11	11	12
masiRNA_u_1639	CUAUAUAAUGUUGACGUGGCACUU	Chr12	13439089	13439112	-		intergenic		9	12	6	3	3	7		0	0	0	0	0	0		7	11	8	5	1	4
masiRNA_u_1640	CUAGACAAAAUUGUGUGUGCUCGC	Chr12	14750481	14750504	-		gene		7	9	8	2	3	10		0	0	0	0	0	0		7	1	2	5	4	0
masiRNA_u_1641	CUUUUUCAAACUGUUAAACGACGU	Chr12	16917533	16917556	-		repeat		9	13	14	4	4	11		0	0	0	0	0	0		6	6	5	5	1	3
masiRNA_u_1642	CUUCCAACGUUGAACCAACUCAUU	Chr12	17986616	17986639	-		intergenic		3	5	4	2	10	9		0	0	0	0	0	0		2	3	6	3	4	1
masiRNA_u_1643	CCUUCCAACGUUGAACCAACUCAU	Chr12	17986617	17986640	-		intergenic		6	20	8	12	9	13		0	0	0	0	0	0		6	1	16	3	13	9
masiRNA_u_1644	CAAAGGACGAUGGGCUUAAAAGAG	Chr12	18362438	18362461	-		intergenic		11	16	12	6	18	28		0	0	0	0	0	0		36	15	11	3	11	9
masiRNA_u_1645	CUUCCUUAAUUAGUCUACCUGAGC	Chr12	18396395	18396418	-		gene		1	2	5	5	4	12		0	0	1	0	0	0		9	5	5	5	3	5
masiRNA_u_1646	CAUGACAUCGUUGUGCGCCUCACC	Chr12	18865260	18865283	-		intergenic		3	6	6	1	8	9		0	0	0	0	0	0		7	4	3	2	5	5
masiRNA_u_1647	CAAAAACGUGACAUAGCUGAUGGA	Chr12	19501308	19501331	-		repeat		17	31	15	9	12	25		0	0	0	0	0	0		28	41	28	18	7	17
masiRNA_u_1648	CUGAUUGCUGAUAUAUAUGAAAAU	Chr12	20979209	20979232	-		intergenic		1	3	7	3	4	13		0	0	0	0	0	0		2	2	9	4	6	11
masiRNA_u_1649	CUUAUAUACGCUGUCUGCAAAGAU	Chr12	22496816	22496839	-		intergenic		5	4	7	4	2	8		0	0	0	0	0	0		3	1	3	5	3	4
masiRNA_u_1650	CAUGAAAGAACCGAUCCAAACACA	Chr12	23208228	23208251	-		intergenic		0	0	1	0	1	15		0	0	0	0	0	1		0	0	0	0	2	0
masiRNA_u_1651	CAUUUAAAAUAUUAAACGUAGACU	Chr12	23492910	23492933	-		repeat		0	5	1	8	0	11		0	0	0	1	0	2		4	6	5	7	2	4
masiRNA_u_1652	CGAAUCUGGACAGACUCCCUGCAC	Chr12	23700640	23700663	-		repeat		27	17	16	4	23	29		0	0	0	0	0	0		15	10	8	3	8	10
masiRNA_u_1653	CACACUGAUCAACUGGAACUUAAG	Chr12	23793691	23793714	-		24-PHAS		0	0	1	2	5	12		0	0	0	0	0	0		0	0	0	0	0	0
masiRNA_u_1654	CAAAGUCUGACAUGUGCGCCCGAU	Chr12	24040691	24040714	-		intergenic		9	16	15	13	4	9		0	0	0	0	0	0		8	10	2	3	4	5
masiRNA_u_1655	CAAAUCGUUUCCGAUCGUUGGAUC	Chr12	24344511	24344534	-		repeat		5	10	6	6	2	8		0	2	0	0	0	0		10	17	9	9	2	4
masiRNA_u_1656	CAAAAUACUGUGCUCCUCUGACGU	Chr12	24721834	24721857	-		intergenic		25	26	18	6	9	11		0	0	0	0	0	0		21	15	5	7	2	4
masiRNA_u_1657	CUAGAGACUGCAAGAUAAGGACUG	Chr12	24729496	24729519	-		gene		3	0	7	3	4	7		0	0	0	1	1	0		1	1	1	3	5	5
masiRNA_u_1658	CUAAACGGUGGAUUGAGAUCAAAU	Chr12	24729529	24729552	-		gene		3	8	5	5	3	22		0	0	1	0	0	0		4	3	5	1	13	8
masiRNA_u_1659	CUAAGAAGACUCUACCGGUGACGC	Chr12	24729739	24729762	-		gene		8	13	5	4	19	37		0	0	1	0	1	0		16	9	15	4	15	13
masiRNA_u_1660	CGAGACUAAGAAGACUCUACCGGU	Chr12	24729744	24729767	-		gene		22	46	19	50	15	47		0	0	0	0	0	0		35	32	44	35	31	50
masiRNA_u_1661	CGCUGGGCUGCGGAGAUGGCAGAG	Chr12	24729771	24729794	-		gene		0	1	1	1	6	4		0	0	0	0	0	1		2	0	0	0	1	2
masiRNA_u_1662	CGACCGAUUGACCGAUCCACCGAC	Chr12	24730595	24730618	-		intergenic		11	35	14	15	16	13		0	0	0	0	0	0		14	18	21	7	11	13
masiRNA_u_1663	CUAGGACGUAUCACAUCCAGUGAC	Chr12	24731612	24731635	-		repeat		8	12	10	17	11	49		0	0	0	0	0	1		11	26	34	21	25	36
masiRNA_u_1664	CUAUGAAUUUUGGUGCUAGAACGU	Chr12	25697799	25697822	-		repeat		14	30	10	15	12	19		0	0	0	0	0	0		24	22	16	10	11	7
masiRNA_u_1665	CAAAGGUAAACUUAUCUGGAGACU	Chr12	25874640	25874663	-		gene		6	23	8	2	2	18		0	3	0	0	0	0		14	35	14	7	3	7
masiRNA_u_1666	CUGGACUGCUAUAUCAUGGGAUAU	Chr12	26492358	26492381	-		intergenic		7	13	2	6	3	11		0	0	0	0	0	0		8	7	2	2	6	7
masiRNA_u_1667	CAUAGGAACAUAGGUCACUGACGU	Chr12	26788080	26788103	-		repeat		28	19	26	14	9	24		1	0	0	0	0	0		29	26	15	7	7	6
masiRNA_u_1668	CUAAAUCAACGUGUGGGAUAUAAU	Chr12	2640625	2640648	-		repeat		4	9	3	8	1	6		0	0	0	0	1	0		10	9	4	6	5	6
masiRNA_u_1669	CAAUGAGAAUGUAUUCCUUAGGAC	Chr12	3393822	3393845	-		gene		2	9	5	10	3	2		0	1	0	1	0	0		9	9	6	9	2	2
masiRNA_u_1670	CUAUAAAACAAAAAACGUGAACUU	Chr12	5901657	5901680	-		repeat		1	4	2	9	1	1		0	0	0	0	0	0		3	2	4	1	2	3
masiRNA_u_1671	CAUCUAAUUGACUGACCGACCAUU	Chr12	6249744	6249767	-		intergenic		3	4	6	4	1	1		1	0	0	0	0	0		4	3	0	0	0	1
masiRNA_u_1672	CAGCCUGACAACGUGUUAAACCAG	Chr12	7556887	7556910	-		repeat		1	6	5	6	2	0		0	0	0	0	0	0		4	4	5	1	2	7
masiRNA_u_1673	CCGCAAAAACGUGACAUAGCUGAU	Chr12	19501311	19501334	-		repeat		2	10	4	8	1	5		0	0	0	0	0	0		11	13	21	8	6	3
masiRNA_u_1674	CAACGAAUCUGUACAUACUCUAUG	Chr12	21003415	21003438	-		repeat		6	1	7	3	2	4		0	0	0	0	0	0		1	0	3	1	0	3
masiRNA_u_1675	GCAUAGCGCGGCGAUGACUGAAAU	Chr12	24266094	24266117	-		gene		2	1	6	15	2	6		0	0	0	0	0	0		2	0	3	3	11	11
masiRNA_u_1676	CUAUAAUUUGUAGUCUGACAUAUG	Chr12	24645059	24645082	-		repeat		2	9	5	5	0	5		0	0	0	0	0	0		9	7	7	9	4	11
masiRNA_u_1677	CAUUCAGACGACUAGCAUAACAGC	Chr12	24731124	24731147	-		intergenic		2	2	8	4	3	2		0	0	0	0	0	0		0	0	2	3	0	1
masiRNA_u_1678	CUUCGGACGUCUGAUGGAUAACAG	Chr12	928948	928971	-		intergenic		11	9	2	2	1	4		0	0	0	0	0	0		10	5	3	0	4	1
masiRNA_u_1679	CAUCAAGAUCUAUUGUAGCCCUAU	Chr12	940662	940685	-		intergenic		6	5	0	1	1	0		0	0	0	0	0	0		0	0	0	0	0	0
masiRNA_u_1680	CUGUAGCAUAAACUCCAAGACGAU	Chr12	1821918	1821941	-		repeat		1	9	4	3	0	4		0	0	0	0	0	0		4	2	3	2	5	4
masiRNA_u_1681	CAAUCGAUCUUACAGCUCCUGGCC	Chr12	2937735	2937758	-		intergenic		8	9	5	4	2	6		0	0	0	0	0	0		10	8	1	3	4	1
masiRNA_u_1682	CGUAAAACUGGAGUGGUAAGAAAU	Chr12	6250024	6250047	-		intergenic		3	10	1	0	1	1		0	1	0	0	0	0		3	0	2	0	1	0
masiRNA_u_1683	CCAUCUAACUGAGUGACUGAUCAU	Chr12	6541269	6541292	-		intergenic		4	12	5	4	2	5		0	0	0	0	0	0		11	9	5	6	3	2
masiRNA_u_1684	CGGGCACUUGUAUUAUUGAAAGGU	Chr12	8420146	8420169	-		repeat		12	10	5	1	4	2		0	0	0	0	0	0		13	0	7	4	1	1
masiRNA_u_1685	CUAAACUUGUGCGGACGUGUCAUC	Chr12	8732491	8732514	-		repeat		10	8	1	1	0	3		0	1	0	0	0	0		8	9	1	1	3	1
masiRNA_u_1686	CAACUGACGGUAGUGGUAUGAGAG	Chr12	11076789	11076812	-		repeat		6	15	2	6	1	5		0	0	0	0	0	0		12	7	7	6	5	4
masiRNA_u_1687	CUUCUAUAUUUAAGGGACGCAGAU	Chr12	16260307	16260330	-		intergenic		3	7	1	5	3	3		0	1	0	0	0	0		14	3	5	4	2	0
masiRNA_u_1688	CCAAUUUAAGUGAAAAUGGACGGU	Chr12	18729316	18729339	-		repeat		2	8	2	2	0	2		0	1	0	0	0	0		0	2	4	5	1	3
masiRNA_u_1689	CAGCCGAUCGAUCCGAGUUAUGAG	Chr12	22536503	22536526	-		repeat		10	6	4	4	3	5		0	0	0	0	0	0		3	2	5	1	2	2
masiRNA_u_1690	CAGUCACUCAACGUCAAAGAACAG	Chr12	23886272	23886295	-		gene		3	17	4	4	2	7		0	1	0	0	0	0		10	9	8	4	1	2
masiRNA_u_1691	CAAUCCGUCAACGUGUACUGCAGU	Chr12	24529435	24529458	-		repeat		10	10	4	1	3	0		0	0	0	0	0	0		5	4	4	1	0	0
masiRNA_u_1692	CAAGAAUCAUCGGACCCACAUGUU	Chr12	24738728	24738751	-		intergenic		5	14	6	0	4	4		0	0	0	0	0	0		15	2	3	3	4	1
masiRNA_u_1693	CAAGUAUUAUUAAUUCGGAGGAAG	Chr12	25213366	25213389	-		repeat		7	5	4	1	1	6		0	0	0	0	0	0		5	3	1	3	0	4
masiRNA_u_1694	CAUCUCCGUCUGUUUAAACCACAC	Chr12	26333328	26333351	-		intergenic		9	4	2	1	1	0		0	1	0	0	0	0		6	1	0	1	1	0
masiRNA_u_1695	CUAUCGAACCUGUCGAACUGCGGU	Chr12	27151400	27151423	-		repeat		7	10	4	4	5	4		0	0	0	0	0	0		7	7	2	1	3	2
masiRNA_u_1696	CGACGCAUAAGAACAGAACAAUCC	Chr5	1010105	1010128	-		24-PHAS		0	0	3	3	6	7		1	0	0	0	1	2		0	0	0	0	0	0
masiRNA_u_1697	UGUUGCUUGUGACUCAUGACUGAG	Chr5	1028296	1028319	+		24-PHAS		0	0	13	18	5	12		0	2	2	1	4	1		0	0	0	0	0	0
masiRNA_u_1698	CAUCGAAUGAGAGAAAGAACAGCU	Chr5	1028392	1028415	+		24-PHAS		0	0	5	7	2	14		1	0	1	0	0	3		0	0	0	0	0	0
masiRNA_u_1699	CAAGAACUGUACAACUAUGUGACA	Chr5	6713722	6713745	-		24-PHAS		0	0	0	6	7	22		2	0	2	1	1	4		0	0	1	0	0	0
masiRNA_u_1700	CAAAAUAGUUUGCAAUGGUGGUAG	Chr5	18834406	18834429	-		24-PHAS		0	0	1	0	4	14		1	0	1	0	2	2		0	0	0	0	0	0
masiRNA_u_1701	CGGAAAUAGAGGAACAACAUAAUU	Chr6	25366651	25366674	+		24-PHAS		0	0	0	2	5	9		0	0	1	0	0	1		0	0	0	0	0	0
masiRNA_u_1702	CAAGACGAGUGUCCUCAUGGCCGA	Chr6	25428257	25428280	-		24-PHAS		0	0	14	21	81	94		4	1	2	5	15	14		1	0	0	0	0	1
masiRNA_u_1703	CUAAGAUCUUCUGCACUUUAUGUU	Chr7	745806	745829	-		24-PHAS		0	1	13	17	29	49		2	0	0	0	1	1		0	0	0	0	0	0
masiRNA_u_1704	CAUGAGUGGAGACUAUUUUUUAAU	Chr11	25573728	25573751	-		24-PHAS		0	0	24	40	12	21		0	1	0	0	3	2		0	0	0	0	0	1
masiRNA_u_1705	CAACCAAACUGAACUAAACCCCAU	Chr12	4660674	4660697	-		24-PHAS		1	0	7	7	33	34		2	1	1	0	4	3		1	0	0	1	2	5
masiRNA_u_1706	CUACUGUGAGACUCUAAUUUGUUA	Chr12	22749705	22749728	-		24-PHAS		0	1	9	34	10	73		1	0	1	0	2	4		0	1	0	0	0	2
masiRNA_u_1707	CGAGAUCCGACGAUUUACGGUGGA	Chr12	22777966	22777989	+		24-PHAS		0	0	1	2	1	13		0	0	1	0	0	3		0	0	0	0	0	0
masiRNA_u_1708	CAAGGCUGGAUCACUGCGAUAAAU	Chr12	22833921	22833944	-		24-PHAS		0	0	43	86	29	110		1	1	4	1	6	11		0	0	0	0	0	0
masiRNA_u_1709	CAGAGAAAAAGGGAGUUCCAACAG	Chr8	809126	809149	-		24-PHAS		0	0	23	28	44	64		1	0	1	0	1	1		0	0	0	2	8	9
masiRNA_u_1710	CAAUCGUCGCCGGGUCAGAUUAAG	Chr8	808790	808813	+		24-PHAS		0	0	10	17	1	6		0	0	0	1	0	1		0	0	0	0	0	1
masiRNA_u_1711	CAACUUGAUCAGGAAGACUUUACU	Chr4	18234210	18234233	-		24-PHAS		0	0	1	1	4	12		0	1	0	0	0	0		0	0	0	0	0	0
masiRNA_u_1712	CGACUAUAUAUGCUCAAUCUUACA	Chr6	25509838	25509861	+		24-PHAS		0	0	0	1	2	8		0	0	1	0	0	0		0	0	0	0	0	0

## Sheet: Fig 7 & S12 (2)
Fig 7 Reads of multi-hit 24-nt masiRNAs
masiRNA ID	Sequence (5'-3')		Number of reads in MEL1-RIP-seq (in each sample)
			WT							mel1							eat1-4
			ST.1_1	ST.1_2	ST.2_1	ST.2_2	ST.4_1	ST.4_2		ST.1_1	ST.1_2	ST.2_1	ST.2_2	ST.4_1	ST.4_2		ST.1_1	ST.1_2	ST.2_1	ST.2_2	ST.4_1	ST.4_2
masiRNA_m_0001	CUUUCCGACAUCCGAUCAAACAUC		5	7	2	2	5	2		0	0	1	0	0	0		6	2	3	3	1	0
masiRNA_m_0002	CAGGAUCAAACUGACUGGCACGCC		9	8	3	0	0	4		0	0	0	1	0	0		3	3	3	0	3	0
masiRNA_m_0003	CAAAUAGCGAAGGAUAAGAGUUGU		4	5	5	5	1	2		0	0	1	0	0	0		2	3	4	4	1	1
masiRNA_m_0004	CAAACUGACUGGCACGCCCGCAUC		6	9	2	5	5	8		2	2	1	0	0	0		10	11	2	2	1	4
masiRNA_m_0005	CUAGACAUGUGGAAGUACGGUAGU		7	4	1	4	0	2		0	0	0	0	0	0		7	4	6	3	1	2
masiRNA_m_0006	CAAAAUGAACUAGAGAUGUAGAGC		0	4	2	3	2	9		0	0	0	0	0	0		4	2	4	1	3	3
masiRNA_m_0007	CCAACUACUGUUGAGAGAACCAUG		4	7	4	2	1	1		0	0	0	0	0	0		4	1	2	1	0	1
masiRNA_m_0008	CUAGAUUUCCUGUAGGUUCCACAG		5	6	5	3	4	4		0	0	0	0	0	0		8	2	6	3	3	2
masiRNA_m_0009	CAACGGCGUUAAAUAUUUAGGGAC		3	7	1	0	2	2		0	0	0	0	0	0		4	0	2	1	1	1
masiRNA_m_0010	CAGCCACGUCGGGAGACCUCCAAG		6	7	2	1	1	1		0	0	0	0	0	0		0	2	3	0	0	0
masiRNA_m_0011	CAACCGGGACUAAAGAUGAUCUUU		6	3	7	4	3	5		0	0	0	0	0	0		4	3	5	2	2	2
masiRNA_m_0012	CAAAUUUUGGAUCACUGGAUGUGC		5	5	2	3	2	1		0	0	0	0	0	0		6	4	2	2	0	3
masiRNA_m_0013	CUUUUGUAUUUGAGUCCCUGUAAU		3	9	1	2	0	0		0	0	1	1	0	0		4	3	1	3	0	2
masiRNA_m_0014	CAACUAGGAACCGUGUGCACUCAA		0	1	1	2	3	10		0	0	0	0	0	0		0	2	1	1	2	0
masiRNA_m_0015	CAAAAUAAACUAGAGAGAUGGAGC		5	7	1	3	5	3		0	0	0	0	0	0		6	2	2	6	0	2
masiRNA_m_0016	CAUGUACUCUCUCCGUUUCACAAU		5	9	3	3	1	6		1	0	0	0	0	0		10	5	5	2	3	2
masiRNA_m_0017	CUUUUAGGUCUCGUGCGCUACCCC		6	7	4	1	4	7		1	1	0	0	0	0		4	5	1	0	5	3
masiRNA_m_0018	CUUUUUUAAAUAUGUUUGACCGUU		2	12	2	5	1	4		0	1	0	0	0	0		11	6	3	6	0	2
masiRNA_m_0019	CAGUCCAGCAUAUUGUACCUCGAG		3	8	0	2	3	5		0	0	0	0	0	0		6	2	4	7	4	5
masiRNA_m_0020	CGAUCUGACGUGGUAUGACGUGGC		9	2	4	1	4	3		0	0	0	0	0	0		5	3	2	1	0	3
masiRNA_m_0021	CAUGUGUAGAUCUAAUGAUGCGUU		6	1	4	1	5	5		0	1	0	0	0	0		3	7	6	3	0	2
masiRNA_m_0022	CUAUGAAUUUUUUUGUUAGACGGG		2	3	6	5	2	2		0	0	0	0	0	0		1	3	1	2	2	0
masiRNA_m_0023	CAGGUUGAUGUGAUAGAAAAUGAC		1	9	1	2	2	3		1	0	0	0	0	0		9	6	6	2	2	1
masiRNA_m_0024	CUUCUAACUUUUCCGUCACAUCGU		5	8	4	3	1	0		0	1	5	2	0	3		4	2	6	2	0	2
masiRNA_m_0025	CUUUGAUCGUCCGUCUUAUUUGAA		2	1	3	1	3	11		0	1	0	0	0	0		7	6	5	1	2	2
masiRNA_m_0026	CUAUCACAUCGGAUGUUUGGACAC		4	5	5	5	3	1		0	0	0	0	0	0		3	4	4	2	2	4
masiRNA_m_0027	CUAUAAAUCUGUAGCCCACUGCUC		3	7	4	3	3	7		0	0	0	0	0	0		2	6	10	5	6	3
masiRNA_m_0028	CGGUUUCUUGAAGACGUUGCUGAG		3	2	9	2	8	5		0	0	0	0	0	0		2	3	2	3	6	7
masiRNA_m_0029	CUAGACUAGUACGCCGGUACCCAU		1	7	5	7	5	11		0	0	0	0	0	0		10	3	6	8	9	10
masiRNA_m_0030	CGGUCAAACGUUGAACGUGAAUAG		5	16	7	9	2	9		0	0	0	0	0	0		17	17	6	6	1	6
masiRNA_m_0031	CAUCCAGAUUUAUUGUACUAGAAU		5	4	3	1	5	13		0	1	0	0	0	0		0	7	4	5	2	1
masiRNA_m_0032	CUAAUUUAUAUUUUUGUAGGCGGU		11	7	9	2	3	3		0	0	0	0	0	0		2	2	3	4	0	1
masiRNA_m_0033	CAAUUCCUGUCAGAAUCCUGUGUU		7	11	6	6	1	8		2	1	0	0	0	1		18	11	9	9	3	3
masiRNA_m_0034	CGAACUAUCCAAGAAUUAUCCGAU		5	6	9	2	2	10		0	1	0	0	0	0		3	9	8	3	2	5
masiRNA_m_0035	CAAGCGAUUGUGGGCCCACGUGAG		7	14	4	2	1	4		0	0	0	0	0	0		6	10	2	4	7	4
masiRNA_m_0036	CAAAAAUAAAAAAUCGGACGUCUC		7	11	8	4	1	4		0	0	0	0	0	0		5	3	3	1	1	3
masiRNA_m_0037	CAACCGUCUGCCCUCACUUGUGAC		10	7	4	3	2	3		0	0	0	0	0	0		6	7	2	1	1	1
masiRNA_m_0038	CAGGAAUGUAAGUGUAAAACAGAG		3	13	6	7	4	7		0	0	0	0	0	0		6	3	7	4	4	3
masiRNA_m_0039	CUGACAUACUGUGUGACCAAUGAG		6	11	5	4	7	8		0	0	0	0	0	0		31	13	12	9	4	4
masiRNA_m_0040	CGAUCGACUAUACUCUGCAACAGU		13	7	10	1	5	4		0	0	0	0	0	0		7	5	1	0	4	4
masiRNA_m_0041	CAACCGGGACUAAAGAUCAAUCUU		6	16	3	3	7	3		0	0	0	0	0	0		5	7	2	4	3	3
masiRNA_m_0042	CAAGGACUACUCGGAUUGUAUCCA		2	5	4	7	4	15		0	1	0	0	0	0		6	19	6	11	4	8
masiRNA_m_0043	CCACAAAAACGUGACACGGCUGAU		6	12	5	5	3	16		0	0	0	0	0	0		8	14	6	8	2	6
masiRNA_m_0044	CAACCGGGACUAAAAUUAAACACG		10	7	6	6	1	5		0	0	0	0	0	0		6	8	9	3	3	2
masiRNA_m_0045	CGACUGUUGGUAUUUCUUAAUGAC		9	10	5	2	2	4		0	1	0	0	0	0		0	4	8	2	1	1
masiRNA_m_0046	CUGUAAUCUGUAAUUUGGACCAAC		2	11	8	13	7	13		0	1	0	0	0	0		14	19	15	9	1	7
masiRNA_m_0047	CAAUCUCUCGUAAUUUGGACUAGC		4	8	4	3	0	1		0	0	0	0	0	0		6	2	1	4	0	0
masiRNA_m_0048	CUUAACUAUGCAAACCGGACGAAU		6	11	2	7	5	3		0	0	0	0	0	0		5	4	3	5	2	2
masiRNA_m_0049	CAUGCCGACUAUUUUUUGAUGAAA		4	7	7	6	7	8		0	0	0	0	0	0		7	10	8	3	1	11
masiRNA_m_0050	CAAAGAAUUAAUCUUCGAGUGGGC		4	13	1	0	1	3		0	0	0	0	0	0		6	8	4	1	2	1
masiRNA_m_0051	CUUCUCUUACCAUAUACAUUGUAG		7	12	9	7	5	4		1	0	0	0	0	0		10	14	10	7	0	2
masiRNA_m_0052	CUAUCGUUGGAUCGAGAAAUAGAC		2	4	7	8	4	9		0	0	1	0	0	0		12	9	7	9	4	7
masiRNA_m_0053	CAAUCUCAAGAUAUGUCGGUCUAG		14	4	7	4	3	1		0	0	0	0	0	0		10	7	4	1	1	1
masiRNA_m_0054	CUUUUACUUGCACUGUUUGACCAC		8	13	4	6	8	3		0	0	1	0	0	0		5	11	7	5	4	6
masiRNA_m_0055	CAAGACAAGUAAUAUGGGACGAAG		9	8	2	4	1	10		0	0	0	0	0	0		11	5	8	4	5	1
masiRNA_m_0056	CAAUUCAUCUAUAGCUAAUCUAAU		2	6	7	9	3	8		0	0	0	2	0	0		5	9	8	1	0	2
masiRNA_m_0057	CAUACAUGUGUUCAAAGAUUCGAU		1	10	1	4	1	2		0	1	1	0	0	0		3	1	1	1	0	3
masiRNA_m_0058	CUAGAUAAUGUAGAGCUCAUAUCU		5	9	3	5	4	3		0	0	0	0	0	0		3	10	4	5	2	4
masiRNA_m_0059	CUAAAAUUAGUGGCGCUGAGAUGU		6	13	1	4	2	4		0	0	0	0	0	0		8	7	3	3	2	2
masiRNA_m_0060	CAUUGCCUCGUUUUUCUCUAUAGA		4	3	4	3	7	3		0	0	0	0	0	0		4	5	9	2	0	0
masiRNA_m_0061	CUUUAAAAGUGACCCGAAUCUAAU		5	7	0	0	0	2		0	0	0	0	0	0		3	1	3	3	1	2
masiRNA_m_0062	CUACGAAUCUGAACAUAUAUAUGU		5	9	9	2	1	3		0	0	0	0	0	0		6	5	0	2	0	3
masiRNA_m_0063	CUUUGACUGUAGCGCUAUGCAAAC		2	9	3	2	1	0		0	0	0	0	0	0		1	1	3	1	2	1
masiRNA_m_0064	CUUACUUUACUAUUGCGGGUGCUC		7	7	4	0	7	4		0	0	0	0	0	0		3	0	4	1	0	2
masiRNA_m_0065	CUGAGAACUAAAUAAUGACGUGGC		15	8	8	2	6	1		0	0	0	0	0	0		8	6	6	9	4	4
masiRNA_m_0066	CUUCGAGAUGUUAUUUUGACCAAC		9	8	7	5	7	11		0	0	0	0	0	0		7	8	4	2	1	4
masiRNA_m_0067	CUUCCGACAUCUGAUCAAACAUCC		13	5	7	2	7	3		0	0	0	0	1	0		9	5	4	0	3	3
masiRNA_m_0068	CGAGGUGAGCUAUUAGUACAUGAU		7	4	3	1	4	8		0	0	0	0	0	0		3	2	4	2	2	2
masiRNA_m_0069	CAAACCACGGAUGUUCGACAGAGU		2	16	7	3	1	8		0	0	0	0	0	0		10	5	5	5	5	4
masiRNA_m_0070	CAUUCCGUCACUAUUCUGUUUGGU		7	10	7	3	2	3		0	0	0	0	0	0		8	5	4	1	0	0
masiRNA_m_0071	CUUCCCCGCGCGACUGGACACGUG		7	7	12	5	11	9		0	0	1	0	0	0		5	3	5	4	4	4
masiRNA_m_0072	CAUCUUUCGUCGGUCGGCCGAAUU		4	9	5	3	7	11		1	4	2	1	0	1		9	9	10	2	0	5
masiRNA_m_0073	CAUCUGUUGGCAAAAAUAAACAAU		2	2	1	3	2	9		0	0	0	0	0	0		6	3	0	5	5	3
masiRNA_m_0074	CAUGGCACUAUAGACACUACUUAU		4	6	7	5	5	8		1	0	0	0	0	0		5	9	6	7	1	1
masiRNA_m_0075	CAAAGAGUGAAAGAGAGAUGGAAC		5	4	7	6	6	10		0	0	1	0	0	0		5	5	9	6	17	10
masiRNA_m_0076	CUAAGAAUCUGUGAGACCCAUGUG		6	10	5	3	2	4		0	0	0	0	0	0		9	8	5	4	3	4
masiRNA_m_0077	CAAAAUUUGCUACAGGACACCGAA		5	11	1	2	0	6		0	0	0	0	0	0		3	0	3	3	0	1
masiRNA_m_0078	CAAUCGGACGAUGUCGAGAACCAG		2	7	4	4	1	10		0	0	0	0	0	0		8	3	9	6	6	3
masiRNA_m_0079	CUUCCGCUGUUGUUCUCUGAUAGU		13	6	9	2	2	3		0	0	0	0	0	1		4	3	3	0	1	1
masiRNA_m_0080	CAAGUAAAUUUAGUGACGUGGAAG		1	12	6	2	6	4		0	0	0	0	0	0		6	7	5	1	4	1
masiRNA_m_0081	CAAUUUAAAAUAGAGGGACGACGA		9	21	5	3	4	5		0	1	0	0	0	0		15	3	1	5	4	6
masiRNA_m_0082	CAUGAUCUUCGGGUGUCUCACAGU		8	11	9	7	6	5		0	0	0	0	0	1		5	8	7	0	1	1
masiRNA_m_0083	CUUGCACUGUUUGACCAUUCGUCU		3	10	2	3	0	6		1	0	0	0	0	0		4	4	3	4	1	3
masiRNA_m_0084	CUAGAAUGACUUAUAUUGUGAAAC		3	14	7	7	3	8		0	0	0	0	0	0		15	4	11	13	4	14
masiRNA_m_0085	UCAAGUUGUUGCACUCGGACGUUU		11	24	6	7	4	8		0	2	2	1	0	1		9	7	4	7	6	3
masiRNA_m_0086	CGGGCCUACCAAUUUAUUAGAGAG		7	9	5	2	2	4		0	0	0	0	0	0		7	3	3	4	1	3
masiRNA_m_0087	CUUAACGGGAUAAAGGAACAACUU		0	1	4	7	14	25		1	1	0	0	2	5		0	0	0	0	0	0
masiRNA_m_0088	CUAAGAACUGUUGGGGUCCGGGCA		4	6	0	1	2	2		0	0	0	0	0	0		4	3	3	2	2	1
masiRNA_m_0089	CAAACUGUCCUAGAGCAUCUCAAC		9	11	2	7	6	22		0	0	3	0	0	0		20	12	5	7	6	13
masiRNA_m_0090	CUUAGAGAUAUGUUUGGGCAAAAG		5	5	1	6	7	12		0	0	0	0	0	0		8	5	3	2	4	8
masiRNA_m_0091	CAAAUAUCGGAUGGAUGACUAGAU		2	2	5	7	0	3		0	0	0	0	0	0		9	5	5	2	2	3
masiRNA_m_0092	CAACAACAACUAAUACCCACUGAC		7	7	0	2	2	1		0	0	0	0	0	0		6	2	2	1	0	3
masiRNA_m_0093	CGAACUGAAAAGACCGAGACCGAG		10	3	3	3	1	5		0	0	0	0	0	0		7	6	4	2	1	1
masiRNA_m_0094	CAAAAUGAACUAGAGAUGUGAAGC		5	6	5	6	7	11		0	1	0	0	0	0		6	6	7	1	3	2
masiRNA_m_0095	CAGCUUCUGAGAAUCUGUAGUUAC		6	4	6	9	5	9		0	0	0	0	0	0		7	7	5	6	0	2
masiRNA_m_0096	CAACGGCGUCAUCUAUUAAAAAAU		5	13	6	9	10	6		0	1	1	1	0	0		8	7	6	4	1	1
masiRNA_m_0097	CAAAAUAAACUAAAGAGGUGGAGC		5	7	3	2	2	1		0	0	0	0	0	0		5	2	1	0	0	3
masiRNA_m_0098	CAAGACGUUGUGUGUGUAUGAGAG		9	6	2	3	3	2		0	0	0	0	0	0		6	3	3	2	3	1
masiRNA_m_0099	CAAACUUUAGAUCUAAACACAGCC		4	7	4	8	6	9		0	0	0	0	0	0		15	8	6	5	6	1
masiRNA_m_0100	CUAGGUUGCUAUAUUCUGAGACGG		24	6	13	3	11	7		0	1	0	1	0	0		4	19	4	2	1	7
masiRNA_m_0101	CCAUUCGUCUUAUUCAAAAACUUU		6	16	3	11	2	9		0	0	0	0	0	0		6	11	6	6	0	3
masiRNA_m_0102	CAACAGGAUGUAGGGUUAUUACCU		4	12	2	6	3	8		0	0	0	0	0	0		10	13	7	6	2	3
masiRNA_m_0103	CAAGUCUAGGCUGAGGCUCGCAAG		5	11	9	5	7	7		0	0	0	0	0	0		17	7	6	3	4	3
masiRNA_m_0104	CUAGGACAGUUUGUUGGGAUGCUC		4	12	8	6	1	2		0	0	0	0	0	0		10	2	6	1	2	3
masiRNA_m_0105	CCACUCCUGUAUGAUUUUCCCAGU		6	5	1	4	2	1		0	0	1	0	0	0		6	2	2	0	7	0
masiRNA_m_0106	CUAAAUAUUUGACGCCGUUGACUU		5	5	2	0	0	3		0	1	0	0	0	0		6	3	1	0	0	0
masiRNA_m_0107	CUUUCGUGUCUUCAGUGUCGCUGC		10	6	6	0	4	3		0	0	0	0	0	0		1	3	1	1	0	0
masiRNA_m_0108	CUAAUAAAUGUAGAGGUAACAUGU		1	6	4	6	2	2		0	0	0	0	0	0		4	4	6	3	0	3
masiRNA_m_0109	CGAAAGUAGAAACCGUCUGAGAUU		3	12	3	6	3	2		1	4	0	0	0	1		4	6	3	3	1	3
masiRNA_m_0110	CAAACUUUUAAUUUUAGCGUGAAC		0	3	0	9	2	15		0	0	0	1	0	0		5	6	8	5	1	1
masiRNA_m_0111	CUAACUGGGCCUAGUACAUGCAAU		9	11	1	5	3	12		0	1	1	0	0	0		10	8	8	7	1	1
masiRNA_m_0112	CUGAACUAUCUAUACCGGACGAAU		9	15	7	4	3	13		0	0	0	2	0	0		18	7	9	5	4	1
masiRNA_m_0113	CUACGGGGCGAAGAAAAAUCGGUG		7	7	1	3	2	2		0	0	0	0	0	0		5	2	5	1	2	0
masiRNA_m_0114	CUACGAUUGUACUGUAAUUACAUC		14	22	19	24	20	45		0	2	0	1	0	0		27	36	24	35	8	19
masiRNA_m_0115	CUUGAAAACUAUCGUUGGAUCGAG		10	16	9	10	2	26		0	0	1	0	0	0		25	31	9	12	7	10
masiRNA_m_0116	CAAGCUAAUCAAGAACAAAGAGAG		8	17	6	2	2	7		0	0	0	0	0	0		16	6	6	7	1	3
masiRNA_m_0117	CUACCGUUAGAUUAAGAUCCAGAG		8	8	6	6	5	4		0	0	0	0	0	0		12	4	4	6	5	4
masiRNA_m_0118	CUAGGACAUAUAAUGGAUUGUAAU		15	50	10	33	9	33		0	1	0	0	0	0		45	35	21	23	9	17
masiRNA_m_0119	CUAAAAAACUGUGGCAUGACUAAC		0	13	3	4	6	3		0	0	0	0	0	0		8	10	4	2	3	5
masiRNA_m_0120	CAACGGCGUCAAAUAUUUAGAAAC		4	16	7	12	11	13		0	2	0	0	0	0		15	11	7	8	4	7
masiRNA_m_0121	CAGUGACCUGAGUAGUACCCCAAG		18	20	13	17	20	38		0	0	1	0	0	0		19	19	20	18	13	12
masiRNA_m_0122	CGGGUGCUUGUAUUUACGACUAAU		10	15	9	6	6	8		0	0	1	0	0	0		7	15	2	6	4	3
masiRNA_m_0123	CUUCAAACUUUUAACUUUUCCAUC		1	13	11	12	2	8		1	0	0	0	0	0		10	6	5	9	1	6
masiRNA_m_0124	CGGCCUAAAGUAGAGUAAAGCAAG		8	12	8	7	10	11		0	0	0	0	0	0		6	4	6	2	5	4
masiRNA_m_0125	CAAUAAUACACUCGGCGGAUCAAU		8	12	4	5	4	5		2	0	0	0	1	0		15	8	6	3	4	0
masiRNA_m_0126	CGAGUAUUUGAACUGGGACUAAAG		10	14	5	3	7	10		0	0	1	0	0	0		10	11	2	4	8	2
masiRNA_m_0127	CGAUCUAACGUUGGACACAGAAAU		22	36	29	30	29	25		0	1	0	0	0	0		26	24	21	12	10	13
masiRNA_m_0128	CUAAAAGUGGAUGGAUGCAGAGAC		10	24	6	2	2	11		0	2	0	0	0	0		25	12	15	4	14	5
masiRNA_m_0129	CUAGGAGGAAGAGAAAUGCUCAAA		0	0	13	14	51	105		0	0	2	0	0	0		0	0	0	0	0	0
masiRNA_m_0130	CUUUUACCAAAUCUGAAGACUGUG		5	14	8	18	11	18		2	0	0	0	0	0		12	11	7	11	3	6
masiRNA_m_0131	CAAUGGAGCUCUGACCGUGUUGUC		2	5	5	3	9	15		0	0	0	0	0	0		1	1	5	3	5	3
masiRNA_m_0132	CAUAGUAUAGUAGUAUAAGGACGA		0	1	1	5	10	14		0	0	0	0	0	0		4	3	6	4	6	7
masiRNA_m_0133	CAAAGACUUAUGGUAUCUUAGAGU		4	5	5	14	8	11		0	0	0	0	0	0		13	8	9	7	2	12
masiRNA_m_0134	CUAUCACAUCGGAUGUUUGAAAAU		6	12	3	17	5	18		0	0	0	1	0	0		15	11	16	18	4	15
masiRNA_m_0135	CUUGGAUAUUGUGUAGAAACCAUG		4	19	5	18	10	26		1	1	0	0	0	0		16	26	17	18	5	21
masiRNA_m_0136	CUAAUACAACGAAUCUGGACAGAC		10	15	15	10	5	16		0	1	0	0	0	1		20	20	14	6	6	12
masiRNA_m_0137	CUAUAACUAGUCGGAUAACCAUGC		5	5	7	6	1	5		0	0	0	0	1	0		7	4	5	4	6	5
masiRNA_m_0138	CUAUGACUUGUAUAUAACUUUGCU		9	33	15	17	8	15		0	0	0	0	0	0		28	24	13	14	5	9
masiRNA_m_0139	CGAGGCAAUGGAUUAGAGAGCUAU		4	12	7	6	4	4		1	0	0	0	0	0		10	7	6	5	2	6
masiRNA_m_0140	UCUCGACGCGACCUACAACUUUGU		19	27	24	11	10	13		1	0	0	0	0	2		8	22	7	6	5	6
masiRNA_m_0141	CGAACUCAAGAUCUCUCACCUCAG		4	8	1	0	3	2		1	0	0	0	0	0		2	0	4	1	0	0
masiRNA_m_0142	CUACGUGGCGAUGUUGACUCAGUC		10	12	4	3	0	2		0	1	1	0	0	0		5	4	3	0	1	1
masiRNA_m_0143	CUAAAACUUUUAAGUCCCUAUCAC		5	7	3	4	2	2		1	1	0	1	0	1		7	8	4	1	1	3
masiRNA_m_0144	CUAUGACUAGUGGGACCAAAAGAG		6	15	4	5	1	7		0	0	0	0	0	0		4	4	4	2	2	1
masiRNA_m_0145	CAAGUAGAAAAAUAUGCUGACAUG		13	66	18	46	31	44		0	0	1	0	1	0		40	51	30	32	15	37
masiRNA_m_0146	CAAGACAUGAAGAAGAAUUAUCGG		9	12	12	17	10	15		0	1	0	0	0	0		18	20	11	10	8	14
masiRNA_m_0147	CAACUGACGGUAGUGACAUGAGAG		6	20	8	4	10	15		0	0	0	0	0	0		14	11	10	2	9	6
masiRNA_m_0148	CGAAUACAGACGGUACUGAGAAAG		6	10	7	8	7	8		0	0	0	0	0	0		11	4	5	4	7	7
masiRNA_m_0149	CAAGACGAGAUUGUGAAGACGAAU		9	29	7	19	6	13		0	0	0	0	1	0		16	17	20	7	5	7
masiRNA_m_0150	CAAAAUGAGAUGGUAGUAACGUGU		17	10	11	4	6	4		0	0	0	0	0	0		2	5	4	3	2	1
masiRNA_m_0151	CUUCAAACUUUUAACUUUUUCAUC		6	11	4	5	1	4		0	0	0	0	0	0		9	8	3	5	1	5
masiRNA_m_0152	CAGAGGAUUGCAAAACACAGGAAA		12	20	12	3	11	12		2	2	2	0	1	0		22	33	11	10	8	12
masiRNA_m_0153	CUUUGUACUGUUAAUGUGGCCCAA		2	7	2	2	3	13		0	1	0	0	0	0		11	6	4	3	4	3
masiRNA_m_0154	CGAGACUCCGAUUACUUCAUGUAC		10	10	6	3	4	8		0	0	0	0	0	0		12	12	13	7	3	2
masiRNA_m_0155	CAAACUUUCAAUUUUGACGUGAAC		4	13	6	16	4	19		0	0	0	0	0	1		13	25	11	16	3	9
masiRNA_m_0156	CAUCCGAAUGUAUUGUAAACUAUU		11	21	38	24	20	32		0	0	0	0	0	0		7	7	13	18	21	30
masiRNA_m_0157	CUAGAAAGUCUUGCAUUGUGAAAC		1	3	0	2	6	5		0	0	0	0	0	1		3	3	2	2	2	1
masiRNA_m_0158	CGGCCAUUGAAAUAGGGAACUUAG		33	17	11	12	5	10		0	0	0	0	0	0		14	9	9	9	3	4
masiRNA_m_0159	CUUCGUCAAUCUGACUCUCAAGUC		23	22	14	5	5	2		0	3	1	0	0	0		15	15	6	7	1	2
masiRNA_m_0160	CUUUCACCUGUACAGACUUUUACU		3	10	0	0	0	2		0	0	0	0	0	0		3	1	0	0	0	0
masiRNA_m_0161	CUAAACCCUAAACCCUAAACCCUA		17	28	10	15	8	7		1	0	0	0	3	0		35	15	10	9	13	3
masiRNA_m_0162	CAUUGACAGGAUGUGGCAAAUCGU		4	11	0	2	1	4		1	0	0	0	0	0		1	2	0	4	1	1
masiRNA_m_0163	CAAGUAUAUUUGGUGACGUGGAAG		5	10	4	1	2	6		0	0	0	0	0	1		11	8	4	3	5	4
masiRNA_m_0164	CUUGAUCCAGAAGAGGUAGACCAU		2	3	6	1	7	8		0	0	0	0	0	0		3	4	4	1	2	2
masiRNA_m_0165	CUAGAUCUUGUAGCACUUAGCAAC		2	1	5	2	5	12		0	0	1	0	0	0		1	9	7	5	2	5
masiRNA_m_0166	CUACACAGUAUAACAUGAACAGAU		3	13	5	11	6	15		0	0	0	0	0	0		14	8	7	13	2	10
masiRNA_m_0167	UAUACGGUAGAAUGUGAAUUUGCU		0	0	10	25	3	4		0	0	0	0	0	0		0	0	0	0	0	0
masiRNA_m_0168	CUAAAUUAAAUUGUUGAUCGGAAU		7	6	7	10	2	5		0	0	0	0	0	0		7	2	5	9	5	8
masiRNA_m_0169	CAAAAUGUACUAGAGUUGUGGAGC		24	40	18	12	20	21		2	2	2	3	0	1		41	28	22	11	17	15
masiRNA_m_0170	CAAUCGUGAAUUUCUGUGUCCAAC		12	14	19	4	9	13		0	0	1	0	0	0		11	12	15	4	8	7
masiRNA_m_0171	CAAACAUCCGAUGUGAUAGGGACU		2	15	5	12	1	26		0	3	0	0	0	0		10	25	11	21	5	4
masiRNA_m_0172	CGAACCAAAAAGACCGAGACCGAG		7	6	1	2	4	3		0	0	0	0	0	0		4	2	4	1	2	1
masiRNA_m_0173	CGAUCUAACCGUGAGCGCCAUGAG		67	51	57	23	33	35		2	2	2	0	0	1		80	50	41	17	14	28
masiRNA_m_0174	CGGGACAUUUCACAGAGAAUCAAU		33	63	33	39	14	30		1	0	1	2	1	1		48	38	39	30	22	30
masiRNA_m_0175	CUUCCAAUUUUGGCGUGAACUAAA		6	8	13	12	7	19		1	0	0	0	0	0		21	28	8	11	7	6
masiRNA_m_0176	CAACGUAAAAAUGUCAGGACCGAC		6	18	8	6	3	11		0	0	0	0	0	0		16	13	13	5	8	1
masiRNA_m_0177	CAAAGCGACGACGGCACUUUCGGC		21	24	13	21	8	14		1	5	1	0	0	1		24	23	30	16	5	16
masiRNA_m_0178	CUACCACUGAAAGAAUAAUUAGCC		10	13	8	6	4	11		0	0	0	0	0	0		17	13	11	4	9	7
masiRNA_m_0179	CUUCGGACUAUAGCAUAUAAAGAU		1	6	5	5	1	9		0	0	0	0	0	0		2	2	3	1	5	2
masiRNA_m_0180	CAAUGAAAAGCUGUAUAGAAACAC		10	13	10	8	12	13		0	0	0	0	0	0		2	2	0	0	1	0
masiRNA_m_0181	CAAAUCGAAGAACUCUCAAAGUAG		3	7	6	5	7	15		0	0	0	0	0	0		9	3	3	2	2	5
masiRNA_m_0182	CAUCAAAAAAUAGUCGGCAUGUAU		21	24	14	22	7	21		0	0	1	0	0	0		22	13	11	15	2	14
masiRNA_m_0183	CAACCGGGACUAAAGAUAAAUCUU		15	9	7	7	3	7		0	0	0	0	0	1		10	6	9	2	7	3
masiRNA_m_0184	CUUCCGGAUUCACCUAGGCACGAG		11	10	7	6	8	6		0	0	0	0	0	0		5	8	3	3	2	4
masiRNA_m_0185	CUAUGUGAAUGAGACUGUAUCAAC		71	140	40	53	24	54		2	6	0	0	1	1		132	111	78	49	41	40
masiRNA_m_0186	CCAUCUUUCGUCGGUCGGCCGAUU		23	21	19	15	15	19		7	3	0	2	1	3		8	22	6	7	5	8
masiRNA_m_0187	CAUCGAAUAUUUGGACACAUGCAU		21	49	13	29	10	27		0	0	0	0	0	1		27	36	20	14	4	10
masiRNA_m_0188	CAUCAGAUCCAUAAUAAUAAACUU		5	25	6	16	3	4		1	0	0	0	0	1		15	4	14	14	1	7
masiRNA_m_0189	CUAUUUUGAACCGGGACUAAAAAU		13	17	8	10	10	9		0	0	0	0	0	0		13	4	5	6	4	5
masiRNA_m_0190	CUAAUACAACGAAUCUGGACAUAC		15	17	3	11	8	8		0	0	0	0	0	0		13	8	8	5	6	2
masiRNA_m_0191	CUGGAUCUAUUAGAACAAAAACAU		6	14	3	8	12	19		0	0	0	0	0	0		8	13	1	9	3	7
masiRNA_m_0192	CUACAAAUCUGUAGCCCGCUGCUC		10	19	10	8	5	14		0	1	1	0	0	1		19	11	7	9	3	3
masiRNA_m_0193	CUAGAACUAUGUAGCCAAGGAGAU		6	13	3	4	2	3		0	0	0	0	0	0		11	10	10	2	1	2
masiRNA_m_0194	CGAGACCUAAAAGUGGAUGGAUGU		32	52	18	22	5	16		1	3	2	1	1	1		21	24	23	7	10	12
masiRNA_m_0195	CUAAAGACAGGGACUAAAGUUAAG		10	15	10	6	9	16		0	0	0	0	0	0		6	9	12	5	4	9
masiRNA_m_0196	CAUCGAAUGUUUGGACACAUGCAU		6	19	9	14	5	24		0	0	0	0	0	0		7	21	14	21	8	12
masiRNA_m_0197	UGAUGCGCCGAAGUUGUAUUGGAU		5	16	7	8	6	11		0	0	0	0	0	0		13	15	16	14	6	11
masiRNA_m_0198	CAUUCCAAGUCCGGCCGGUCUGAG		6	5	3	1	5	3		0	1	0	0	0	0		5	6	11	2	2	5
masiRNA_m_0199	CCAUCAUCUGUGACGUGCACCAAC		6	8	4	2	0	3		0	0	0	0	0	0		6	4	1	0	0	0
masiRNA_m_0200	CAAAUCGCGACACCUGUACACAAG		6	10	3	3	2	6		1	2	0	0	0	0		10	3	2	0	1	4
masiRNA_m_0201	CAAAGUUUGGAUUUUGGUUGAAAU		3	20	8	20	10	13		0	0	0	0	0	0		5	12	12	13	4	6
masiRNA_m_0202	CCAUCUUUCGUCGGUCGGCCGAAU		14	20	15	8	12	19		2	3	4	1	2	2		14	18	7	9	5	3
masiRNA_m_0203	CCUAAGGACCUUGUGCGUGACGAG		17	14	14	11	6	12		0	0	0	0	0	1		12	12	10	3	6	7
masiRNA_m_0204	CUUGGAAACUACUGUUGGAUCGAG		7	6	2	10	10	11		0	0	0	0	0	0		9	10	9	9	6	6
masiRNA_m_0205	CAUCCCAACAAACUGUCCUAGAGC		12	6	8	2	20	9		0	0	0	1	1	0		13	5	8	5	5	5
masiRNA_m_0206	CUGACUAGUGACGACUGACGAGAG		13	18	11	10	6	13		0	0	0	0	0	1		25	11	4	8	8	4
masiRNA_m_0207	CUAUUAGAUUGGCUAUAGAUGAAU		4	21	10	21	3	15		0	2	0	0	0	0		13	18	15	15	5	14
masiRNA_m_0208	CAAAAUGAACUAGAGAGGUGGAGC		18	17	8	3	9	7		1	0	0	0	0	0		7	6	7	3	6	6
masiRNA_m_0209	CAGGUUGAUGUGAUGGAAAAUGAC		5	6	3	2	2	3		0	0	0	0	0	0		5	3	3	1	2	2
masiRNA_m_0210	CUUCAAACUUUCAACUUUUCCAUC		4	12	4	1	4	0		1	0	0	3	0	0		7	5	4	3	1	3
masiRNA_m_0211	CAAAUAAGACGGACGGUCAAACGU		6	6	4	1	2	3		0	1	0	0	0	1		4	1	4	1	0	1
masiRNA_m_0212	CUAUUGUGUGAACUAUGUAAUAAU		8	5	15	12	6	18		1	0	0	0	0	0		8	6	9	12	6	6
masiRNA_m_0213	CUUGCACUGUUUGACCACUCGUCU		7	18	4	4	5	6		0	0	0	0	0	1		9	3	10	2	2	2
masiRNA_m_0214	CAAGAGGACAAUGAAGACAGGAAG		7	7	2	2	0	3		0	0	0	0	0	0		8	5	1	0	0	1
masiRNA_m_0215	CAGUGACUUCUAGUCUGUGACGGA		10	13	9	9	9	15		1	1	0	0	0	0		12	17	8	3	6	8
masiRNA_m_0216	CUAGUACUACGAAUCUGGACAGAG		9	16	5	9	3	12		0	0	0	0	0	0		14	11	5	3	5	5
masiRNA_m_0217	CUUGGCCUUAUAGAAUUCUUUCAG		9	18	7	5	6	3		0	0	0	0	0	0		15	9	7	3	2	4
masiRNA_m_0218	CUUGGACAAGGGGACACCUAUGGG		17	20	7	6	9	11		0	0	0	2	3	0		9	11	6	6	6	6
masiRNA_m_0219	CUUUGAAUCGUUAUUGUAAGACUG		7	19	14	11	10	22		0	0	0	0	0	0		11	13	20	16	2	12
masiRNA_m_0220	CAAUUUGUUAUUGUGUGCCUCGGC		13	41	7	12	4	16		0	0	0	0	0	0		20	12	19	12	10	11
masiRNA_m_0221	CCAAAAGUGAACGAUCUUAAAAAC		14	25	12	11	3	9		0	1	0	0	0	0		15	18	8	7	2	5
masiRNA_m_0222	CUUCUAAUUUUGGCGUGAACUAAA		15	12	9	17	6	24		1	0	0	0	0	0		17	20	19	12	2	7
masiRNA_m_0223	CAAGACUGAGUACAACCACCGUAC		15	24	20	19	8	32		0	0	1	0	0	0		22	21	36	8	15	15
masiRNA_m_0224	CUUUUUCAUGUGAACUCUAAUGAA		1	3	2	6	2	10		0	0	0	0	0	0		14	15	5	8	5	2
masiRNA_m_0225	CAACCGGGACUAAAGAUCAAAAAG		7	11	8	5	7	5		0	0	0	0	0	0		14	7	5	5	4	3
masiRNA_m_0226	CAAGUAGGAAAAUAUGCUGACAUG		25	26	12	22	5	22		4	1	0	1	0	1		22	22	17	20	10	15
masiRNA_m_0227	CAAAUCAAUAGAGUGGAGCCAAAU		5	17	3	3	7	7		0	0	0	0	0	0		16	12	7	2	3	10
masiRNA_m_0228	CUAAAAGUGGAUGGAUGUGGAGAC		20	34	10	7	6	16		0	2	0	0	0	0		24	11	12	1	7	5
masiRNA_m_0229	CCGGGCACCAUUGUUGAAAUUGAG		230	247	156	103	129	139		1	1	0	1	0	1		257	172	163	82	87	103
masiRNA_m_0230	CAAAAAUAGGCCGUGGACUCAGCG		11	14	7	7	3	7		0	0	0	0	0	0		18	5	10	5	1	5
masiRNA_m_0231	CAAACGUUGAACAUGAACAGUGCU		2	8	1	10	1	10		0	0	0	0	0	0		13	10	5	11	6	3
masiRNA_m_0232	CUAUAAAAUAUAGGACGUAGCGAG		9	6	9	13	8	19		0	0	0	0	0	0		9	6	9	10	5	8
masiRNA_m_0233	CUAGAUUGUUAUAUUAUGGGACGG		8	1	4	3	11	8		1	0	0	1	0	1		0	5	0	1	0	3
masiRNA_m_0234	CGAUGGCAUAUUGUAGAACGUGAU		5	9	4	6	6	3		0	0	0	0	0	0		10	4	5	3	1	4
masiRNA_m_0235	CAAGAAGAAGCUUAGGCCUGACGG		14	4	0	0	2	1		0	0	0	0	1	1		7	5	0	1	2	1
masiRNA_m_0236	CAUUGACAAGCACUCUAAUCCCAG		5	5	1	3	3	2		0	0	0	0	0	0		4	2	1	2	1	2
masiRNA_m_0237	CUUAAACUUGUAGAGGUGUGUCAU		4	9	1	6	0	6		0	0	0	0	0	0		6	9	4	3	4	3
masiRNA_m_0238	CAACGGCUGGUAGAGUUUGGUACC		7	6	6	2	6	1		0	0	0	0	0	0		7	8	8	3	4	5
masiRNA_m_0239	CAGACUACAGCUUUCCGACACGCC		16	9	5	2	4	3		1	1	0	0	0	0		7	7	1	5	0	1
masiRNA_m_0240	CAAGCAUAUUUGGUGACGUGGAAG		8	7	1	1	6	4		0	0	0	0	1	0		5	4	4	0	3	4
masiRNA_m_0241	CUAAAGAUUAGUUUUGGAGACCGU		5	6	3	1	2	8		0	0	0	0	0	0		3	9	1	6	0	1
masiRNA_m_0242	CUACAGAUCUGUAGCCCGCUGCUC		9	8	3	7	4	7		1	7	2	2	0	2		11	16	10	7	2	5
masiRNA_m_0243	CAAUGCACUCAACCGGUCUGUGAC		1	10	1	1	1	5		0	1	0	0	0	0		10	6	3	2	4	1
masiRNA_m_0244	CAAAAUGAACUAGAGUUGUGGAGC		40	40	26	22	24	33		2	1	0	0	0	0		33	32	31	18	21	28
masiRNA_m_0245	CUAGUCAAGAGGUGUGGAACUAAU		7	22	3	9	8	8		0	0	0	0	0	0		10	5	3	5	4	2
masiRNA_m_0246	CAUGCCGAGACAGUAUAAAUCACU		15	25	16	13	17	17		0	2	0	2	0	1		23	21	19	7	6	6
masiRNA_m_0247	CAUAAAAUUUUUGAAUAAGACGAA		0	0	2	8	2	15		0	0	0	0	0	0		12	5	8	3	2	6
masiRNA_m_0248	CAUAUGGACUAUAACUAUUGUUAU		10	24	21	16	13	19		0	0	0	0	0	0		16	23	11	16	0	10
masiRNA_m_0249	CUUUAAUAUAUUAUAGGUGUCGGU		5	12	2	10	4	7		0	0	0	0	0	0		8	4	3	1	2	2
masiRNA_m_0250	CUAUGAACUGUUGGGGUCCGGGCA		1	9	4	4	1	5		0	0	0	1	0	0		3	5	2	1	3	1
masiRNA_m_0251	CUUAAGACGGCCGCAUGCGAAAAU		4	8	1	1	1	1		0	0	0	0	0	1		5	2	2	1	2	1
masiRNA_m_0252	CUAACGAGCCUAGUAAUAUAUGAU		1	11	2	4	1	6		0	0	0	0	0	0		8	2	6	3	0	1
masiRNA_m_0253	CUUCCUCUAUUGGACUAGUCUUUU		7	7	2	2	3	2		0	0	0	0	0	0		0	4	2	4	0	1
masiRNA_m_0254	CAAGGAUGUUGGCUCUCAUGCAAG		11	6	4	3	5	5		0	1	0	0	0	0		5	6	7	2	4	2
masiRNA_m_0255	CUUCCGCAUAUUAACUUCUGAAAU		5	7	4	3	1	2		0	0	0	0	0	0		5	4	1	1	0	0
masiRNA_m_0256	CAAAAACUGGCGGACAAACUCGUC		3	10	7	2	2	4		0	0	0	0	0	0		4	8	4	3	1	4
masiRNA_m_0257	CUUGGACUAAUUCGCGAGACGAAU		9	16	5	8	9	17		1	0	1	0	0	0		2	26	8	11	5	5
masiRNA_m_0258	CAUCGAAUCUUUGAACACAUACAU		2	19	5	5	5	13		0	0	0	0	0	0		10	14	7	6	2	2
masiRNA_m_0259	CAAUGUCUCUUAUACUCUCACACC		9	25	6	11	6	10		1	0	0	0	0	0		18	7	12	1	5	2
masiRNA_m_0260	CUUGUCCAAGUAGAACUAGGGAAA		11	48	19	51	10	68		0	1	1	1	1	0		86	93	72	64	36	50
masiRNA_m_0261	CAUCGAACGUUUGAACACCUGCAU		12	22	15	20	4	13		0	0	0	2	0	0		20	9	14	8	8	9
masiRNA_m_0262	CCGCAAAAACGAGACACGGCUGAU		4	17	14	9	0	11		0	0	1	0	0	0		11	9	13	5	4	7
masiRNA_m_0263	CUAGGUUGCUAUAUUCUGGGACGG		2	7	5	6	3	4		0	0	0	0	0	0		3	2	3	3	2	1
masiRNA_m_0264	CGAUCUUUAGUCCCGGAUUGGUAG		4	11	4	5	3	12		2	0	0	0	0	1		11	12	4	4	5	3
masiRNA_m_0265	CGGGUAUUUGAACCGGGACUAAAG		12	12	4	5	4	7		1	0	0	0	0	0		5	6	3	1	1	4
masiRNA_m_0266	CUAUUCGAAUAGUUUUACUCUGAU		5	16	8	19	5	66		0	1	0	0	0	0		23	42	33	37	14	26
masiRNA_m_0267	CUAGCCGACCUAUAAUUUUGCGAU		12	10	13	8	12	13		0	0	0	0	0	1		7	18	10	6	3	3
masiRNA_m_0268	CCUCAGAAAACACUGUAGCGUGGC		34	33	19	10	10	21		1	3	1	0	0	0		26	17	12	6	10	6
masiRNA_m_0269	CAAAGAGUGUUAAUGGAUUGAAAC		4	12	4	7	2	12		0	0	0	0	0	0		17	4	8	5	3	5
masiRNA_m_0270	CUUCCAACUUUUCCGUCACAUCGU		16	18	7	4	2	6		3	3	0	6	0	7		8	8	9	3	3	2
masiRNA_m_0271	CUAACUCGUGUGCCCUCAAAUAAC		19	11	9	5	8	2		0	0	0	0	0	0		0	0	1	0	0	0
masiRNA_m_0272	CUAACGAUCAUAUGUGCUCAUGCC		6	7	5	0	3	2		0	0	0	0	0	0		3	4	2	2	1	1
masiRNA_m_0273	CGAUCCAACGGUGUAGGAUGAGAG		4	14	5	5	3	2		0	0	0	0	0	0		12	7	5	7	1	1
masiRNA_m_0274	CUAGCUCAUAAAUCUCCACAUCAG		4	7	1	2	6	2		0	0	0	0	0	0		3	2	1	1	3	2
masiRNA_m_0275	CAUCGAACAUUUGAACACCUACAU		1	10	4	8	3	3		0	0	0	0	0	0		9	3	6	6	3	9
masiRNA_m_0276	CGAUAAAGUGAUUUGUAAGAUUGU		0	10	4	14	2	21		0	0	0	0	0	0		8	10	7	8	6	11
masiRNA_m_0277	CAAUGACAUGUGGAUCAGGAUGAC		15	30	12	13	9	19		0	0	0	0	0	0		42	21	10	11	5	18
masiRNA_m_0278	CUUUUCGUGGACACUGUAAAAAAG		16	10	11	13	9	14		0	0	0	0	0	1		18	24	13	12	9	13
masiRNA_m_0279	CAACUUUCAUCGUACUGUGCUCUC		6	10	9	14	8	6		0	0	0	0	0	0		11	3	13	5	5	5
masiRNA_m_0280	CUAUCAAUAGAACUUCGCACCGUC		19	25	16	20	12	19		0	2	0	2	0	1		26	14	17	9	6	8
masiRNA_m_0281	CAAAGAGAGGUAGACCGAGCAGAG		21	24	18	10	17	12		0	0	0	0	0	0		13	10	12	10	11	6
masiRNA_m_0282	CUAGGUUUGUUUAUUUUGGGACGG		266	211	147	76	139	129		6	23	8	20	6	27		153	150	76	76	33	74
masiRNA_m_0283	CGAGACCUAAAAGUGGAUGGAUGC		81	64	37	31	42	29		2	2	0	6	2	0		39	46	27	23	19	21
masiRNA_m_0284	CAGCGCAUUAUACUGGGACAACGU		7	12	5	8	6	6		0	0	0	0	0	0		7	10	6	4	3	3
masiRNA_m_0285	CUAAAAGUGGAUGGAUGCGGAGAC		22	22	6	12	4	12		0	0	0	1	0	0		21	12	4	3	8	5
masiRNA_m_0286	CUGACUCUGAAGGAACUCGUGUGU		9	10	4	3	1	2		0	0	0	0	0	0		12	5	5	3	0	1
masiRNA_m_0287	CUGAAACUGUUUGGCUGAGCUCCA		11	9	4	7	4	18		0	4	0	1	0	2		24	28	8	6	3	14
masiRNA_m_0288	CUUUUUGAAUCUGAAUCAGCCGUG		27	35	34	7	23	23		1	1	0	0	0	1		15	18	20	10	10	11
masiRNA_m_0289	CAGAACCACUGAGACCGAAGAGAG		16	13	2	6	2	3		1	0	0	0	0	0		7	6	3	1	4	1
masiRNA_m_0290	CAAGUGUGGCCAUCAAAUUUUGAG		10	5	0	0	0	1		0	0	0	0	0	0		7	8	5	7	3	0
masiRNA_m_0291	CUUUCGAGCCUCGUCGGAAUGUCG		25	22	12	3	18	24		0	0	1	0	0	0		17	16	13	14	9	8
masiRNA_m_0292	CUUCGACUCCUUGGUACUCCUAGU		8	2	4	1	4	6		0	0	0	0	0	2		0	0	1	1	2	2
masiRNA_m_0293	CAUCCACUUUUAGGUCUCGUGCGC		106	160	48	49	39	88		3	18	5	5	1	5		149	141	74	44	33	24
masiRNA_m_0294	CAAAAAGAACCGGGACUAAAGAUU		5	10	3	2	5	5		0	0	0	0	0	0		6	8	1	3	1	2
masiRNA_m_0295	CAUCCGAUGUGAUAGGGACUUAAA		7	52	10	42	20	109		0	1	2	1	1	0		99	84	54	42	40	52
masiRNA_m_0296	CUAGAAAGUCUUACAUUAUGAAAC		3	10	8	13	0	10		0	1	0	0	0	0		11	10	5	17	2	16
masiRNA_m_0297	CAAAAACCUGAUCGCCCGCCCGUC		7	6	2	1	1	1		0	0	0	0	0	0		1	6	2	1	3	1
masiRNA_m_0298	CUAGACACUACUCUUCCAAUACAA		2	9	3	5	6	8		1	0	0	0	0	0		8	17	8	5	6	6
masiRNA_m_0299	CCGUUCGUCUUAUUCAAAAACUUU		6	18	2	6	2	9		0	0	2	0	0	1		14	7	12	6	4	3
masiRNA_m_0300	CAACCGGGACUAAAAAUAGAUCUU		6	12	10	3	6	4		0	1	0	0	0	0		8	4	4	2	0	0
masiRNA_m_0301	CAGCGAACUGUGGUAUCAUCCCGC		10	4	5	0	6	11		0	0	0	0	0	0		4	6	0	4	1	4
masiRNA_m_0302	CAACUGACGGUAGUGGCAUGAGAG		27	32	23	20	12	23		1	0	0	0	0	0		38	23	34	8	21	14
masiRNA_m_0303	CUCUUACUUGUAUUGUACUCCAAG		3	9	8	10	6	15		0	1	0	0	0	0		10	10	7	5	5	6
masiRNA_m_0304	CUUUGGAUCUUUGAGCUCUUUCUC		2	1	4	2	7	3		0	0	0	0	0	0		3	0	1	2	1	0
masiRNA_m_0305	CUUGGAAACUACCGUUGGAUCGAG		25	31	17	24	21	26		0	1	0	0	0	1		32	39	34	17	12	15
masiRNA_m_0306	CUAUCCGACGUGGGCUGAAAGAUU		8	15	3	2	3	9		0	0	0	1	0	2		6	3	1	1	1	2
masiRNA_m_0307	CUUCGAAUGUAUGAGCGUGCCAGU		26	19	8	4	11	7		0	0	0	0	0	0		11	11	11	3	6	5
masiRNA_m_0308	CUUCCAUCUGUGACGGCCCAUAAC		12	19	12	4	9	13		0	0	0	0	0	0		20	10	2	5	4	8
masiRNA_m_0309	CACGAGACCUAAAAGUGGAUGGAU		37	67	24	23	21	24		12	11	6	9	6	15		40	37	32	12	7	19
masiRNA_m_0310	CUACCGGAUAUAUUAGAAGAAGAG		29	20	22	13	18	15		1	0	2	0	1	0		32	10	13	13	13	12
masiRNA_m_0311	CUAAAGAACUUUGACGUUAAGUGU		10	30	16	22	8	13		0	0	0	0	0	0		8	19	11	15	4	18
masiRNA_m_0312	CUAGAAAGUCUUAUAAUAUGAAAU		1	5	1	8	0	11		0	0	0	0	0	0		4	4	7	11	0	6
masiRNA_m_0313	CUCUCACACUUAGACUCUCAUGAG		7	3	6	7	5	11		0	0	0	0	0	0		9	8	5	5	5	9
masiRNA_m_0314	UUAACAACGGAAUUUUGCAUCAGA		11	10	6	9	2	13		0	1	0	0	1	0		5	9	8	4	0	4
masiRNA_m_0315	CAACCGGGACUAAAGAUCAUUUUU		7	10	3	5	5	8		0	0	0	0	0	0		3	2	4	5	3	0
masiRNA_m_0316	CAAUAAAAAAAUAACGUGUAAGAU		2	19	6	16	5	16		0	0	0	0	0	0		13	11	6	13	7	13
masiRNA_m_0317	CGACGCGACCUACAACUUUGUAGU		15	13	10	3	10	8		0	3	1	2	0	0		6	7	12	3	2	3
masiRNA_m_0318	CAACGGCGUCAUCUAUUAAAAAAC		12	18	11	9	10	14		1	2	0	1	0	0		22	14	17	1	10	6
masiRNA_m_0319	CGACUUUUGCUUAACUUCUACGAU		3	11	4	7	3	11		0	0	4	2	0	0		8	12	7	6	2	8
masiRNA_m_0320	CUAGAAAGUCUUACAUUGUGAAAC		8	22	12	23	9	14		0	0	0	0	0	1		12	10	12	21	5	20
masiRNA_m_0321	CUUUUCCUGCUAAUAUAUUGACGU		10	8	7	5	6	4		0	0	0	0	0	0		1	3	4	3	1	2
masiRNA_m_0322	CAAACUUCAGUCCUUUUCCAUCAC		5	6	8	5	3	2		1	0	0	0	0	1		2	5	5	2	2	5
masiRNA_m_0323	CUAGAAAGUCUUACAUUGUGAAAU		4	6	2	8	1	3		0	0	0	0	0	0		4	10	8	2	2	2
masiRNA_m_0324	CAAAGUAAUAUCGUAUCGUAGGAU		5	11	4	10	0	9		0	0	0	0	0	0		6	10	4	6	3	6
masiRNA_m_0325	CGAUGGCAUAUUGUAGAACGUGAC		4	8	4	4	0	5		0	0	0	0	0	0		13	4	6	5	1	2
masiRNA_m_0326	CCAAACCUCAUAGACUGUGACUAG		5	11	3	6	2	4		0	0	0	0	0	0		7	8	5	6	1	3
masiRNA_m_0327	CUUUUUCUCACAUGUUUGACCAUU		6	6	5	3	0	2		0	0	0	1	0	0		0	1	3	3	0	2
masiRNA_m_0328	CGACCCUAAACUCUAUAUAUCAGU		1	9	3	1	2	0		0	0	0	0	0	0		3	2	1	3	1	0
masiRNA_m_0329	CUUCGGAUGUAUGAGCGUGCCAGU		4	7	1	4	1	2		0	1	0	0	0	0		3	2	1	0	3	3
masiRNA_m_0330	CUUUUCUGUUUAGAUUCCGACGUU		4	13	6	4	3	6		0	0	0	0	0	0		3	4	2	7	1	2
masiRNA_m_0331	CAAGUCCUUGGUGUAAUCUUCAGA		6	8	1	1	1	4		0	0	0	0	1	0		4	2	8	4	1	3
masiRNA_m_0332	CAUUCCAAGUCCGGCCAGUCUGAG		5	9	3	2	1	0		0	0	0	0	0	0		13	6	4	1	1	0
masiRNA_m_0333	CUAACUGCUGCUGUCCUACUAACC		1	12	2	1	4	3		1	1	0	0	0	0		5	2	5	2	1	4
masiRNA_m_0334	CAACCGGGACUAAAGAUCAAAUAU		4	12	3	0	0	2		1	1	2	0	0	0		2	1	1	3	0	1
masiRNA_m_0335	CUUAAAAUCGUUGCUAGCCGUGGU		7	6	0	0	1	2		0	1	0	0	0	0		7	1	0	1	1	0
masiRNA_m_0336	CAAACGGCCGCCGAAUCUGCAUAC		11	8	8	1	1	3		0	0	0	0	0	0		5	2	2	1	4	0
masiRNA_m_0337	CGAGGACUUGGAAACGACGCUGAC		1	11	3	3	0	4		1	1	0	0	0	0		5	9	3	3	4	3
masiRNA_m_0338	CUGGAAUUUGCGGGCCGUCACAAG		10	7	4	1	1	6		0	0	0	0	0	0		7	3	6	3	4	5
masiRNA_m_0339	CAACCCACCAAUUAGUAGACUGAU		4	11	0	5	2	3		0	0	0	0	0	0		3	3	3	4	6	3
masiRNA_m_0340	CAAAGAACAACUAUCGGACAAGAU		8	8	4	2	2	3		0	0	0	0	0	0		9	4	2	4	1	1
masiRNA_m_0341	CUAGAUAACGUAGAGCUCAUAUCU		3	8	6	2	1	5		0	0	0	0	0	0		9	6	3	8	1	1
masiRNA_m_0342	CUCGAUCCAACGGUAGUUUCCAAG		25	31	17	24	21	26		0	1	0	0	0	1		32	39	34	17	12	15
masiRNA_m_0343	CCACUCGAGCUAUUAGAAUCCAUC		5	7	0	6	3	1		1	0	0	1	0	0		5	2	2	1	3	0
masiRNA_m_0344	CAGAUAACGUUAUCUCUGACGGGU		5	6	3	1	0	2		0	0	0	0	0	0		0	0	1	0	1	1
masiRNA_m_0345	CAUGAUUUGACAAUGUGGUGCUAC		6	7	1	3	2	5		0	0	0	0	0	1		6	5	3	3	1	1
masiRNA_m_0346	CUUAAACUUGUAGGGGUGUGUCAU		6	10	2	2	0	4		0	1	0	0	0	0		5	5	3	1	1	0
masiRNA_m_0347	CUAUCUAUCUAUCUAUCUAUCUAU		5	10	4	3	1	7		0	0	0	1	0	0		7	2	2	5	2	4
masiRNA_m_0348	CAAAAUUUUUAUAACCGGGACUAA		19	20	10	11	10	11		0	0	0	0	0	0		14	11	15	6	6	12
masiRNA_m_0349	CGAGACGAAUCUUUUGAGCCUAAU		33	113	43	87	30	77		3	2	2	1	2	3		105	105	68	49	36	54
masiRNA_m_0350	CCAAAGACUGUCGACAGCCACGAC		6	7	8	3	6	7		0	0	0	0	0	0		6	5	6	3	2	4
masiRNA_m_0351	CUACGAAUCCGGGACUAAAGAUCG		13	8	6	3	13	13		0	0	0	1	0	0		10	8	9	5	5	8
masiRNA_m_0352	CAAUAAAAACCGGGGCUAAAGAUG		13	15	7	5	6	12		1	0	0	1	0	0		16	10	7	4	13	1
masiRNA_m_0353	CCAAAUCUCAUAGACUGUGACUAG		2	5	4	4	6	4		0	0	0	0	0	0		5	7	3	3	0	1
masiRNA_m_0354	CAAUUCUCGAUCGUUUUCCGUCCG		7	2	8	2	3	2		0	0	0	0	0	0		4	5	3	1	1	2
masiRNA_m_0355	CAUUUGUUGAACUAUAGGGUAGAU		7	18	10	4	3	3		0	0	0	0	0	1		10	9	5	3	1	5
masiRNA_m_0356	CAGCCAUCUGUUGAUACAAGAAAC		15	12	20	10	19	14		0	0	0	1	0	0		24	16	8	9	12	12
masiRNA_m_0357	CAAUCCGGGACUAAAGAUCGCUAU		9	5	4	9	4	2		0	2	1	2	1	2		5	4	6	5	3	4
masiRNA_m_0358	CUUCGGACGAUUUAUUUUACAAAU		3	9	2	2	1	1		0	0	0	0	0	0		7	3	1	0	1	2
masiRNA_m_0359	CAAGGGAACGUGUGUGAUUAUCUC		5	8	5	0	1	4		0	1	0	0	0	0		1	4	1	1	0	0
masiRNA_m_0360	CGGGUGUAUAUUGAUCUGACGAUC		9	4	3	1	1	5		0	0	0	0	0	0		6	1	2	1	2	1
masiRNA_m_0361	CAACCGGGACUAAAGAGACAAUAG		10	13	2	1	4	3		0	0	0	0	0	0		7	4	5	1	5	3
masiRNA_m_0362	CGAGGACGCGCUCACCGAACGGGA		10	6	2	1	1	0		1	1	0	0	0	0		1	3	0	2	1	0
masiRNA_m_0363	CAUCCACUUUAGGUCUCGUACGCU		21	56	17	16	9	16		0	1	0	1	0	0		34	30	19	3	13	11
masiRNA_m_0364	CUACUAUAUGAUUGUGUGCAUGAG		2	2	2	2	3	8		0	0	0	0	0	0		5	3	4	1	0	4
masiRNA_m_0365	CAAAUCGUAGACGUGUGAUAAAGU		8	3	7	3	6	2		0	0	0	0	0	0		7	4	4	2	0	3
masiRNA_m_0366	CAAGUACAAAUGGUUCAUCGGCGU		3	8	0	3	1	0		0	0	0	0	0	0		5	4	0	0	0	1
masiRNA_m_0367	CAUUAACAUAUAUAUGAAUGUAGG		3	10	4	7	1	7		0	0	1	0	0	0		8	11	10	11	2	5
masiRNA_m_0368	CGAUGGCAUAUUGUAGAACAUGAU		2	10	3	4	2	2		0	0	0	0	0	0		4	8	6	5	2	8
masiRNA_m_0369	CAAAUUUGUACUACGGGGGUGGAG		2	10	0	1	2	2		0	0	0	0	0	0		1	0	0	0	1	1
masiRNA_m_0370	CAACUGACGGGAGUGGCAUGAGAG		2	12	1	2	3	0		0	0	0	0	0	0		5	1	1	2	2	1
masiRNA_m_0371	CAAGGUAUCAUUAGGAGAAGAGAG		41	44	18	14	23	33		0	1	0	0	1	0		37	16	17	9	13	23
masiRNA_m_0372	CGAGACGAAUCUAUUGAGCCUAAU		21	34	28	16	37	30		0	0	0	1	0	0		18	37	22	16	17	20
masiRNA_m_0373	CUUCCGGCUGUAGACUAGCCCUCA		4	2	7	10	13	22		0	1	0	0	0	0		7	25	3	8	6	10
masiRNA_m_0374	CGAUCUUUAGUCCCGGAUUGGUAC		10	5	7	4	3	2		2	2	1	0	0	2		11	6	1	1	4	1
masiRNA_m_0375	CUACUGUUUUACUUAUCUUAAAUC		2	2	7	3	2	1		0	0	0	0	0	0		0	5	2	1	1	0
masiRNA_m_0376	CUAUAGAAUUCUGUGGAAAGCCGU		4	8	5	9	2	4		0	0	0	0	0	0		12	3	3	2	2	1
masiRNA_m_0377	CAAAACUACAGAUACUAUGACCAA		5	5	3	6	5	4		0	0	0	0	1	0		19	9	11	2	3	4
masiRNA_m_0378	CAAGUAAAUUUGGUGACGUGGAAG		21	12	15	4	14	13		0	0	0	0	0	0		12	7	14	2	2	10
masiRNA_m_0379	CGUGGGUGCGUAGUUUUUAACCGG		5	11	11	10	4	3		0	0	0	0	0	0		12	11	6	4	4	2
masiRNA_m_0380	CAGAUUUGUAGCCAGCUGUAGCAC		97	121	68	62	66	99		2	5	2	3	1	1		120	114	65	41	53	46
masiRNA_m_0381	CUUCGCUACUGUAUCUUCACGGGA		3	9	3	1	3	5		0	0	0	0	0	0		2	3	3	3	1	1
masiRNA_m_0382	CUUUUCUUUCCGGUCAAAAACAUC		4	22	8	6	6	4		1	1	0	0	0	0		9	10	5	8	2	2
masiRNA_m_0383	CCGGGUGUUUAUUGAUCUGACGAU		6	9	2	8	1	7		0	0	0	0	0	0		15	10	3	3	3	3
masiRNA_m_0384	CAACCGGGACUAAAGAUCGAUCUU		19	37	8	17	8	14		0	1	1	0	0	1		19	18	11	7	10	9
masiRNA_m_0385	CUUUGAAUCGUAGGAAUGAAAAAA		6	8	4	12	3	16		0	0	0	0	0	0		13	16	17	5	5	11
masiRNA_m_0386	CUAUCUCAAUCGGGCCACAACUAG		23	21	8	4	6	11		1	0	0	0	0	2		16	12	5	3	5	2
masiRNA_m_0387	CGGUUAUUUCACCCGGGACUAAAG		22	21	20	12	26	28		0	1	0	0	0	3		17	24	7	8	2	14
masiRNA_m_0388	CUAAAGAUCGAUCUUUACUCCCGG		29	23	15	9	14	4		0	1	0	0	0	0		25	17	10	10	4	6
masiRNA_m_0389	CAAGCUCUCUCGGUAUGUGGAAAG		11	7	9	2	8	4		0	0	0	0	2	0		3	10	5	0	4	1
masiRNA_m_0390	CGAUAAACUCUUAGCUAGAACAAG		6	6	4	7	0	8		0	0	0	0	0	0		12	3	3	4	2	7
masiRNA_m_0391	CUAACGGAAUAUGCAGAUACAGAU		2	9	5	9	2	6		0	0	0	0	0	0		3	2	11	7	1	4
masiRNA_m_0392	CGAUCCGUCGUAGUAGAAUUCACC		7	14	5	2	4	3		0	0	0	0	0	0		5	6	1	2	2	3
masiRNA_m_0393	CAUCUGAUGGACGAGAAGACCAUG		13	10	4	3	2	1		0	1	0	0	0	0		4	7	0	3	2	0
masiRNA_m_0394	CAACUCGAUCCGGCUUCUGAACGA		5	6	3	9	4	10		0	1	0	0	0	0		7	5	5	3	2	1
masiRNA_m_0395	CUAAACCCAGCUCCACAACUCUAG		11	8	1	2	2	2		0	1	0	0	0	0		10	3	3	3	2	3
masiRNA_m_0396	CUUCCCCUAUUGGACUAGUCUUUU		41	25	15	10	12	5		0	1	0	0	0	0		11	9	7	5	2	6
masiRNA_m_0397	CAACCGGGACUAAAGAUCAUCUUU		28	18	18	11	23	13		1	0	0	0	0	0		17	18	17	9	10	3
masiRNA_m_0398	CUAAGUGUUGGUGAAGAAGACGAG		19	18	6	2	9	4		0	0	0	0	0	0		4	8	9	2	4	2

## Sheet: Fig 7 & S12 (3)
Fig 7 Position of multi-hit 24-nt masiRNAs
masiRNA ID	Position					overlap
	chromosome	from	to	direction
masiRNA_m_0001_001	Chr1	33605752	33605775	+		repeat
masiRNA_m_0001_002	Chr1	36501112	36501135	+		repeat
masiRNA_m_0001_003	Chr9	11637368	11637391	+		repeat
masiRNA_m_0002_001	Chr10	12810038	12810061	-		repeat
masiRNA_m_0002_002	Chr4	22264869	22264892	+		repeat
masiRNA_m_0002_003	Chr5	14352477	14352500	-		repeat
masiRNA_m_0003_001	Chr10	21917327	21917350	-		repeat
masiRNA_m_0003_002	Chr12	9407530	9407553	-		repeat
masiRNA_m_0003_003	Chr12	9412051	9412074	-		repeat
masiRNA_m_0003_004	Chr5	7486394	7486417	+		repeat
masiRNA_m_0003_005	Chr5	7490989	7491012	+		repeat
masiRNA_m_0003_006	Chr7	23485923	23485946	+		repeat
masiRNA_m_0003_007	Chr7	23490521	23490544	+		repeat
masiRNA_m_0004_001	Chr10	12810032	12810055	-		repeat
masiRNA_m_0004_002	Chr5	14352471	14352494	-		repeat
masiRNA_m_0004_003	Chr5	18661696	18661719	+		repeat
masiRNA_m_0005_001	Chr4	2690241	2690264	-		repeat
masiRNA_m_0005_002	Chr6	14222266	14222289	+		repeat
masiRNA_m_0005_003	Chr6	21519286	21519309	+		repeat
masiRNA_m_0005_004	Chr6	8578342	8578365	+		repeat
masiRNA_m_0006_001	Chr3	35912337	35912360	+		repeat
masiRNA_m_0006_002	Chr7	4901771	4901794	+		repeat
masiRNA_m_0006_003	Chr9	1282124	1282147	-		repeat
masiRNA_m_0007_001	Chr11	16101522	16101545	-		repeat
masiRNA_m_0007_002	Chr8	16195169	16195192	+		repeat
masiRNA_m_0007_003	Chr8	18349337	18349360	+		repeat
masiRNA_m_0007_004	Chr9	646444	646467	+		repeat
masiRNA_m_0008_001	Chr2	11951183	11951206	+		repeat
masiRNA_m_0008_002	Chr2	11977499	11977522	+		repeat
masiRNA_m_0008_003	Chr8	26665405	26665428	+		repeat
masiRNA_m_0009_001	Chr10	13264859	13264882	+		repeat
masiRNA_m_0009_002	Chr7	4283398	4283421	+		repeat
masiRNA_m_0009_003	Chr9	8763990	8764013	-		intergenic
masiRNA_m_0009_004	Chr9	8764024	8764047	-		intergenic
masiRNA_m_0009_005	Chr9	8764058	8764081	-		repeat
masiRNA_m_0010_001	Chr11	587556	587579	+		repeat
masiRNA_m_0010_002	Chr2	25825939	25825962	-		repeat
masiRNA_m_0010_003	Chr6	525462	525485	+		repeat
masiRNA_m_0011_001	Chr1	3240752	3240775	-		repeat
masiRNA_m_0011_002	Chr12	18212640	18212663	+		repeat
masiRNA_m_0011_003	Chr12	18745452	18745475	+		repeat
masiRNA_m_0011_004	Chr5	1772037	1772060	-		repeat
masiRNA_m_0011_005	Chr8	17878182	17878205	-		repeat
masiRNA_m_0012_001	Chr1	29575900	29575923	+		intergenic
masiRNA_m_0012_002	Chr12	9359654	9359677	+		gene
masiRNA_m_0012_003	Chr2	5652881	5652904	-		intergenic
masiRNA_m_0012_004	Chr4	28919480	28919503	-		gene
masiRNA_m_0012_005	Chr5	28001079	28001102	+		intergenic
masiRNA_m_0012_006	Chr5	29765115	29765138	+		gene
masiRNA_m_0013_001	Chr1	30123503	30123526	-		repeat
masiRNA_m_0013_002	Chr11	7480866	7480889	+		repeat
masiRNA_m_0013_003	Chr12	12945635	12945658	+		repeat
masiRNA_m_0013_004	Chr4	20795052	20795075	-		repeat
masiRNA_m_0014_001	Chr1	28215668	28215691	-		intergenic
masiRNA_m_0014_002	Chr1	9040343	9040366	+		intergenic
masiRNA_m_0014_003	Chr3	29752044	29752067	+		gene
masiRNA_m_0015_001	Chr1	8971917	8971940	-		repeat
masiRNA_m_0015_002	Chr2	6581908	6581931	+		repeat
masiRNA_m_0015_003	Chr8	27452291	27452314	+		repeat
masiRNA_m_0016_001	Chr1	13394553	13394576	-		repeat
masiRNA_m_0016_002	Chr3	11492149	11492172	-		repeat
masiRNA_m_0016_003	Chr4	17920170	17920193	-		repeat
masiRNA_m_0017_001	Chr1	20841242	20841265	-		repeat
masiRNA_m_0017_002	Chr11	6839980	6840003	-		repeat
masiRNA_m_0017_003	Chr4	2432526	2432549	-		repeat
masiRNA_m_0017_004	Chr6	18978878	18978901	-		repeat
masiRNA_m_0018_001	Chr1	42925380	42925403	-		repeat
masiRNA_m_0018_002	Chr5	13792616	13792639	+		repeat
masiRNA_m_0018_003	Chr8	27089380	27089403	+		repeat
masiRNA_m_0019_001	Chr1	21539853	21539876	-		repeat
masiRNA_m_0019_002	Chr2	35605090	35605113	+		repeat
masiRNA_m_0019_003	Chr3	6798473	6798496	-		repeat
masiRNA_m_0019_004	Chr8	25957564	25957587	-		repeat
masiRNA_m_0019_005	Chr9	9460588	9460611	+		repeat
masiRNA_m_0020_001	Chr1	27044684	27044707	+		repeat
masiRNA_m_0020_002	Chr4	27419552	27419575	-		repeat
masiRNA_m_0020_003	Chr6	27446519	27446542	-		repeat
masiRNA_m_0020_004	Chr7	28681627	28681650	-		repeat
masiRNA_m_0021_001	Chr11	22323576	22323599	+		repeat
masiRNA_m_0021_002	Chr3	15484571	15484594	-		repeat
masiRNA_m_0021_003	Chr5	21660211	21660234	-		repeat
masiRNA_m_0021_004	Chr9	5371201	5371224	+		repeat
masiRNA_m_0022_001	Chr1	19959543	19959566	+		repeat
masiRNA_m_0022_002	Chr10	22516709	22516732	+		repeat
masiRNA_m_0022_003	Chr4	29670189	29670212	+		repeat
masiRNA_m_0022_004	Chr6	6258331	6258354	-		repeat
masiRNA_m_0022_005	Chr7	8841325	8841348	-		repeat
masiRNA_m_0023_001	Chr1	4917222	4917245	-		repeat
masiRNA_m_0023_002	Chr11	2927367	2927390	+		repeat
masiRNA_m_0023_003	Chr11	7964385	7964408	+		repeat
masiRNA_m_0023_004	Chr6	18141525	18141548	-		repeat
masiRNA_m_0023_005	Chr6	9044462	9044485	+		repeat
masiRNA_m_0024_001	Chr3	14263602	14263625	+		repeat
masiRNA_m_0024_002	Chr6	21381035	21381058	-		repeat
masiRNA_m_0024_003	Chr7	20440075	20440098	+		repeat
masiRNA_m_0025_001	Chr1	27932499	27932522	-		repeat
masiRNA_m_0025_002	Chr12	7933728	7933751	+		repeat
masiRNA_m_0025_003	Chr12	7933846	7933869	-		repeat
masiRNA_m_0025_004	Chr2	32560010	32560033	+		repeat
masiRNA_m_0026_001	Chr12	6975272	6975295	-		repeat
masiRNA_m_0026_002	Chr3	6151374	6151397	+		repeat
masiRNA_m_0026_003	Chr4	23386335	23386358	+		repeat
masiRNA_m_0026_004	Chr6	16200319	16200342	-		repeat
masiRNA_m_0027_001	Chr1	18420728	18420751	+		repeat
masiRNA_m_0027_002	Chr1	27497678	27497701	+		repeat
masiRNA_m_0027_003	Chr1	7243567	7243590	-		repeat
masiRNA_m_0027_004	Chr12	7275594	7275617	-		repeat
masiRNA_m_0027_005	Chr3	25461845	25461868	-		repeat
masiRNA_m_0027_006	Chr5	22244607	22244630	-		repeat
masiRNA_m_0027_007	Chr6	24340457	24340480	-		repeat
masiRNA_m_0028_001	Chr1	28207876	28207899	-		repeat
masiRNA_m_0028_002	Chr10	19586726	19586749	-		repeat
masiRNA_m_0028_003	Chr12	11526603	11526626	-		repeat
masiRNA_m_0029_001	Chr1	14336460	14336483	-		intergenic
masiRNA_m_0029_002	Chr1	14338787	14338810	-		intergenic
masiRNA_m_0030_001	Chr1	9592084	9592107	-		repeat
masiRNA_m_0030_002	Chr3	12631388	12631411	-		repeat
masiRNA_m_0031_001	Chr2	12377874	12377897	-		repeat
masiRNA_m_0031_002	Chr2	4179250	4179273	+		repeat
masiRNA_m_0032_001	Chr2	9001128	9001151	-		repeat
masiRNA_m_0032_002	Chr5	15653165	15653188	-		repeat
masiRNA_m_0032_003	Chr9	15261915	15261938	-		repeat
masiRNA_m_0033_001	Chr1	34175249	34175272	-		repeat
masiRNA_m_0033_002	Chr2	23595242	23595265	-		repeat
masiRNA_m_0034_001	Chr2	28251310	28251333	-		repeat
masiRNA_m_0034_002	Chr8	18649193	18649216	-		repeat
masiRNA_m_0034_003	Chr8	19026033	19026056	+		repeat
masiRNA_m_0035_001	Chr3	4034722	4034745	-		intergenic
masiRNA_m_0035_002	Chr3	6341992	6342015	-		intergenic
masiRNA_m_0036_001	Chr10	21845199	21845222	+		intergenic
masiRNA_m_0036_002	Chr3	9775002	9775025	-		intergenic
masiRNA_m_0037_001	Chr3	15981322	15981345	-		repeat
masiRNA_m_0037_002	Chr8	21919973	21919996	-		repeat
masiRNA_m_0038_001	Chr2	15685549	15685572	+		repeat
masiRNA_m_0038_002	Chr3	20887657	20887680	-		repeat
masiRNA_m_0039_001	Chr3	23898603	23898626	-		intergenic
masiRNA_m_0039_002	Chr3	23898642	23898665	-		intergenic
masiRNA_m_0040_001	Chr5	1342094	1342117	-		intergenic
masiRNA_m_0040_002	Chr5	1364195	1364218	+		intergenic
masiRNA_m_0041_001	Chr10	2542001	2542024	+		repeat
masiRNA_m_0041_002	Chr5	6218179	6218202	-		repeat
masiRNA_m_0042_001	Chr4	10072094	10072117	+		repeat
masiRNA_m_0042_002	Chr6	14953863	14953886	-		repeat
masiRNA_m_0043_001	Chr6	11253310	11253333	+		repeat
masiRNA_m_0043_002	Chr6	17615608	17615631	-		repeat
masiRNA_m_0044_001	Chr2	799287	799310	+		repeat
masiRNA_m_0044_002	Chr6	30939701	30939724	-		repeat
masiRNA_m_0045_001	Chr6	13956615	13956638	-		repeat
masiRNA_m_0045_002	Chr7	8656592	8656615	-		repeat
masiRNA_m_0046_001	Chr8	20900118	20900141	-		repeat
masiRNA_m_0046_002	Chr8	20900985	20901008	+		repeat
masiRNA_m_0047_001	Chr8	8130268	8130291	-		intergenic
masiRNA_m_0047_002	Chr8	8130517	8130540	-		intergenic
masiRNA_m_0048_001	Chr6	13539808	13539831	-		repeat
masiRNA_m_0048_002	Chr8	17158646	17158669	-		repeat
masiRNA_m_0049_001	Chr10	2257196	2257219	-		repeat
masiRNA_m_0049_002	Chr9	20776017	20776040	-		repeat
masiRNA_m_0050_001	Chr5	21661058	21661081	+		repeat
masiRNA_m_0050_002	Chr9	5370439	5370462	-		repeat
masiRNA_m_0051_001	Chr12	23279702	23279725	+		intergenic
masiRNA_m_0051_002	Chr9	13000230	13000253	-		intergenic
masiRNA_m_0052_001	Chr1	31261771	31261794	-		repeat
masiRNA_m_0052_002	Chr10	10219388	10219411	-		repeat
masiRNA_m_0052_003	Chr11	17249136	17249159	-		repeat
masiRNA_m_0053_001	Chr11	9140587	9140610	-		repeat
masiRNA_m_0053_002	Chr6	24599967	24599990	+		repeat
masiRNA_m_0054_001	Chr1	42366243	42366266	-		repeat
masiRNA_m_0054_002	Chr12	937861	937884	-		repeat
masiRNA_m_0055_001	Chr12	2185615	2185638	-		intergenic
masiRNA_m_0055_002	Chr12	2185644	2185667	-		repeat
masiRNA_m_0056_001	Chr1	17716507	17716530	+		repeat
masiRNA_m_0056_002	Chr4	28250258	28250281	+		repeat
masiRNA_m_0057_001	Chr1	10833470	10833493	+		repeat
masiRNA_m_0057_002	Chr1	14606042	14606065	-		repeat
masiRNA_m_0057_003	Chr12	9294550	9294573	-		repeat
masiRNA_m_0057_004	Chr4	25081075	25081098	-		repeat
masiRNA_m_0057_005	Chr4	34109956	34109979	-		repeat
masiRNA_m_0057_006	Chr5	13715716	13715739	+		repeat
masiRNA_m_0057_007	Chr9	1812253	1812276	-		repeat
masiRNA_m_0058_001	Chr1	30652321	30652344	+		intergenic
masiRNA_m_0058_002	Chr3	19944250	19944273	+		intergenic
masiRNA_m_0059_001	Chr1	37819615	37819638	+		repeat
masiRNA_m_0059_002	Chr11	17304550	17304573	+		intergenic
masiRNA_m_0060_001	Chr1	31405934	31405957	-		repeat
masiRNA_m_0060_002	Chr12	1075719	1075742	+		repeat
masiRNA_m_0060_003	Chr12	1884282	1884305	-		repeat
masiRNA_m_0060_004	Chr12	23385501	23385524	-		repeat
masiRNA_m_0060_005	Chr12	25414873	25414896	+		repeat
masiRNA_m_0060_006	Chr2	2218495	2218518	+		repeat
masiRNA_m_0060_007	Chr3	8841016	8841039	-		repeat
masiRNA_m_0060_008	Chr4	29486363	29486386	+		repeat
masiRNA_m_0060_009	Chr5	19329508	19329531	-		repeat
masiRNA_m_0061_001	Chr1	12765947	12765970	-		repeat
masiRNA_m_0061_002	Chr2	4014280	4014303	+		repeat
masiRNA_m_0061_003	Chr3	13838427	13838450	-		repeat
masiRNA_m_0061_004	Chr3	34351199	34351222	-		intergenic
masiRNA_m_0062_001	Chr3	32618816	32618839	+		repeat
masiRNA_m_0062_002	Chr5	20567525	20567548	-		repeat
masiRNA_m_0063_001	Chr1	6559905	6559928	+		repeat
masiRNA_m_0063_002	Chr3	16506456	16506479	-		repeat
masiRNA_m_0063_003	Chr3	7857678	7857701	+		repeat
masiRNA_m_0063_004	Chr5	22353595	22353618	+		repeat
masiRNA_m_0063_005	Chr6	2312024	2312047	+		repeat
masiRNA_m_0063_006	Chr7	29279621	29279644	+		repeat
masiRNA_m_0063_007	Chr9	17419276	17419299	+		repeat
masiRNA_m_0064_001	Chr12	1884403	1884426	+		repeat
masiRNA_m_0064_002	Chr3	8841137	8841160	+		repeat
masiRNA_m_0065_001	Chr3	34699201	34699224	+		intergenic
masiRNA_m_0065_002	Chr9	15149319	15149342	-		intergenic
masiRNA_m_0066_001	Chr3	22372734	22372757	-		repeat
masiRNA_m_0066_002	Chr4	20619851	20619874	+		repeat
masiRNA_m_0067_001	Chr12	7806789	7806812	+		repeat
masiRNA_m_0067_002	Chr4	585591	585614	+		repeat
masiRNA_m_0068_001	Chr3	35443887	35443910	+		repeat
masiRNA_m_0068_002	Chr3	6158119	6158142	-		repeat
masiRNA_m_0068_003	Chr5	23912825	23912848	+		repeat
masiRNA_m_0068_004	Chr8	12694781	12694804	-		repeat
masiRNA_m_0069_001	Chr5	3556446	3556469	+		repeat
masiRNA_m_0069_002	Chr5	3556619	3556642	+		repeat
masiRNA_m_0070_001	Chr11	23927995	23928018	+		gene
masiRNA_m_0070_002	Chr5	5657353	5657376	+		intergenic
masiRNA_m_0071_001	Chr11	24392777	24392800	+		intergenic
masiRNA_m_0071_002	Chr6	3443591	3443614	+		intergenic
masiRNA_m_0072_001	Chr1	40525252	40525275	-		repeat
masiRNA_m_0072_002	Chr2	19111110	19111133	+		repeat
masiRNA_m_0072_003	Chr5	10821324	10821347	+		repeat
masiRNA_m_0072_004	Chr6	21523945	21523968	+		repeat
masiRNA_m_0073_001	Chr3	26138434	26138457	-		repeat
masiRNA_m_0073_002	Chr3	8253677	8253700	-		repeat
masiRNA_m_0073_003	Chr6	23795284	23795307	+		repeat
masiRNA_m_0073_004	Chr7	8610215	8610238	+		repeat
masiRNA_m_0073_005	Chr8	11639546	11639569	+		repeat
masiRNA_m_0074_001	Chr1	35798858	35798881	-		repeat
masiRNA_m_0074_002	Chr10	260939	260962	-		repeat
masiRNA_m_0074_003	Chr2	13177997	13178020	+		repeat
masiRNA_m_0074_004	Chr6	27084202	27084225	+		repeat
masiRNA_m_0075_001	Chr1	11196189	11196212	-		repeat
masiRNA_m_0075_002	Chr1	11196247	11196270	-		repeat
masiRNA_m_0075_003	Chr6	29378003	29378026	+		repeat
masiRNA_m_0076_001	Chr6	27340954	27340977	+		intergenic
masiRNA_m_0076_002	Chr6	27341028	27341051	+		intergenic
masiRNA_m_0077_001	Chr2	28965816	28965839	-		repeat
[truncated: 5,665 more rows]

## Sheet: Fig 7 & S12 (4)
	Fig 7B
[truncated: 17 more rows]

[truncated: 10 more sheets: S1, S2, S3, S5A, S5B, S6, S7, S8, S9, S10]
